# Supplementary material for: Sex Chromosome-wide Transcriptional Suppression and Compensatory Cis-Regulatory Evolution Mediate Gene Expression in the Drosophila Male Germline
Source: PLoS Biol. 2016 Jul 12;14(7):e1002499. doi: 10.1371/journal.pbio.1002499 (PMC4942098; doi:10.1371/journal.pbio.1002499)
Supplement: S2 Data — (XLSX) [file pbio.1002499.s002.xlsx]

## Sheet: gene_info
fbtr	fbgn	chrom	XA	TS8	HK2	strand	GeneSym	RPKM_testis	log(RPKM_testis)	tissue_max_exp_FlyAtlas	max_exp_FlyAtlas	tau	tes_avg	motif_count	motif2_YN	motif_strand
FBtr0080074	FBgn0032208	2L	A	NTS8	HK2	-	CG5604	49	5.64386	abr_avg	9.32825	0.0706241	8.96491	0	No	NONE
FBtr0081179	FBgn0051800	2L	A	NTS8	HK2	-	CG31800	18	4.24793	abr_avg	8.37381	0.0769196	8.23668	0	No	NONE
FBtr0074819	FBgn0005198	3L	A	NTS8	HK2	+	gig	4	2.32193	abr_avg	7.76558	0.0789539	5.68845	0	No	NONE
FBtr0089173	FBgn0011747	4	A	NTS8	HK2	-	Ank	4	2.32193	abr_avg	9.8723	0.080655	7.56958	0	No	NONE
FBtr0302616	FBgn0026620	3R	A	NTS8	HK2	-	tacc	20	4.39232	abr_avg	9.19078	0.0868128	7.88239	0	No	NONE
FBtr0310542	FBgn0051992	4	A	NTS8	HK2	-	gw	8	3.16993	abr_avg	10.1908	0.0902339	7.75394	0	No	NONE
FBtr0086072	FBgn0033028	2R	A	NTS8	HK2	-	CG11665	10	3.45943	abr_avg	8.82525	0.0960849	7.95909	0	No	NONE
FBtr0085160	FBgn0046247	3R	A	NTS8	HK2	+	CG5938	40	5.35755	abr_avg	8.78328	0.105694	8.31293	0	No	NONE
FBtr0088239	FBgn0017414	2R	A	NTS8	HK2	-	cag	18	4.24793	abr_avg	7.08916	0.107684	6.55301	0	No	NONE
FBtr0076940	FBgn0035720	3L	A	NTS8	HK2	-	CG10077	111	6.80735	abr_avg	11.4488	0.111529	10.8095	0	No	NONE
FBtr0336457	FBgn0037261	3R	A	NTS8	HK2	-	CG9775	33	5.08746	abr_avg	9.97455	0.112632	7.61045	0	No	NONE
FBtr0072142	FBgn0001123	2R	A	NTS8	HK2	+	Galphas	11	3.58496	abr_avg	10.5392	0.114572	6.38733	0	No	NONE
FBtr0089110	FBgn0026262	4	A	NTS8	HK2	-	bip2	6	2.80735	abr_avg	9.76946	0.115002	7.74411	0	No	NONE
FBtr0083663	FBgn0051229	3R	A	NTS8	HK2	+	CG31229	89	6.49185	abr_avg	8.02848	0.116241	7.4208	0	No	NONE
FBtr0086607	FBgn0034379	2R	A	NTS8	HK2	+	CG15073	7	3	abr_avg	6.4584	0.117116	6.1873	0	No	NONE
FBtr0084577	FBgn0039159	3R	A	NTS8	HK2	-	mRpS24	29	4.90689	abr_avg	8.08599	0.117739	7.03827	0	No	NONE
FBtr0076821	FBgn0035807	3L	A	NTS8	HK2	-	CG7492	34	5.12928	abr_avg	8.56597	0.119671	6.97237	0	No	NONE
FBtr0087019	FBgn0034180	2R	A	NTS8	HK2	-	Ehbp1	18	4.24793	abr_avg	8.57163	0.122532	5.40203	0	No	NONE
FBtr0073293	FBgn0035540	3L	A	NTS8	HK2	+	Syx17	20	4.39232	abr_avg	7.9564	0.125677	6.7076	0	No	NONE
FBtr0089111	FBgn0039907	4	A	NTS8	HK2	-	lgs	26	4.75489	abr_avg	8.84072	0.128276	8.71253	0	No	NONE
FBtr0077882	FBgn0031357	2L	A	NTS8	HK2	+	mRpL48	28	4.85798	abr_avg	7.86231	0.128813	5.34449	0	No	NONE
FBtr0089636	FBgn0031883	2L	A	NTS8	HK2	+	CG11266	8	3.16993	abr_avg	9.56079	0.129943	5.67054	0	No	NONE
FBtr0086111	FBgn0000054	2R	A	NTS8	HK2	+	Adf1	12	3.70044	abr_avg	9.34822	0.130966	7.08116	0	No	NONE
FBtr0088452	FBgn0011241	2R	A	NTS8	HK2	-	cbx	8	3.16993	abr_avg	8.52236	0.138672	7.65855	0	No	NONE
FBtr0072551	FBgn0035142	3L	A	NTS8	HK2	+	hipk	4	2.32193	abr_avg	10.0457	0.1389	6.45465	0	No	NONE
FBtr0081259	FBgn0032814	2L	A	NTS8	HK2	+	CG10366	17	4.16993	abr_avg	7.52805	0.140465	6.8029	0	No	NONE
FBtr0082134	FBgn0037747	3R	A	NTS8	HK2	+	CG8481	8	3.16993	abr_avg	9.12277	0.140951	6.76861	0	No	NONE
FBtr0076062	FBgn0036237	3L	A	NTS8	HK2	-	viaf	38	5.2854	abr_avg	8.82899	0.14444	6.98395	0	No	NONE
FBtr0300945	FBgn0033638	2R	A	NTS8	HK2	-	CG9005	8	3.16993	abr_avg	8.01121	0.145304	4.79692	0	No	NONE
FBtr0078121	FBgn0016977	2L	A	NTS8	HK2	+	spen	2	1.58496	abr_avg	10.1462	0.146937	5.02998	0	No	NONE
FBtr0072201	FBgn0034951	2R	A	NTS8	HK2	-	CG3860	23	4.58496	abr_avg	9.74287	0.147925	8.10544	0	No	NONE
FBtr0113028	FBgn0031893	2L	A	NTS8	HK2	+	CG4495	8	3.16993	abr_avg	8.35738	0.149777	5.83001	0	No	NONE
FBtr0086283	FBgn0034504	2R	A	NTS8	HK2	+	CG8929	15	4	abr_avg	9.49206	0.152253	6.57308	0	No	NONE
FBtr0075314	FBgn0025558	3L	A	NTS8	HK2	+	CG4101	26	4.75489	abr_avg	7.89512	0.152527	6.98003	0	No	NONE
FBtr0300543	FBgn0037614	3R	A	NTS8	HK2	+	CG8116	34	5.12928	abr_avg	8.25991	0.153483	4.34589	0	No	NONE
FBtr0087383	FBgn0026370	2R	A	NTS8	HK2	+	SRPK	45	5.52356	abr_avg	8.66129	0.15428	4.76311	1	Yes	SAME
FBtr0085767	FBgn0039836	3R	A	NTS8	HK2	-	CG1750	0	0	abr_avg	6.63376	0.15445	3.74224	0	No	NONE
FBtr0339185	FBgn0039751	3R	A	NTS8	HK2	-	CG1983	5	2.58496	abr_avg	7.23945	0.155532	4.10014	1	Yes	DIFF
FBtr0072903	FBgn0000543	3L	A	NTS8	HK2	-	ecd	23	4.58496	abr_avg	7.10789	0.157282	5.46937	0	No	NONE
FBtr0080561	FBgn0019890	2L	A	NTS8	HK2	-	Smg5	26	4.75489	abr_avg	9.2766	0.15769	8.01256	0	No	NONE
FBtr0083255	FBgn0086370	3R	A	NTS8	HK2	+	sra	129	7.02237	abr_avg	9.35344	0.158246	7.84495	0	No	NONE
FBtr0110835	FBgn0051151	3R	A	NTS8	HK2	-	wge	2	1.58496	abr_avg	8.28188	0.159672	4.47891	0	No	NONE
FBtr0075505	FBgn0040230	3L	A	NTS8	HK2	+	dbo	21	4.45943	abr_avg	9.02819	0.159781	5.00281	0	No	NONE
FBtr0085322	FBgn0039600	3R	A	NTS8	HK2	+	CG1646	22	4.52356	abr_avg	8.9402	0.159989	7.28584	0	No	NONE
FBtr0075945	FBgn0260945	3L	A	NTS8	HK2	-	Atg1	4	2.32193	abr_avg	9.60525	0.160588	5.85673	0	No	NONE
FBtr0099993	FBgn0086690	3L	A	NTS8	HK2	-	cp309	1	1	abr_avg	8.17331	0.161056	5.28045	0	No	NONE
FBtr0081001	FBgn0027885	2L	A	NTS8	HK2	-	Aac11	21	4.45943	abr_avg	10.3847	0.161121	8.12834	0	No	NONE
FBtr0089214	FBgn0011642	4	A	NTS8	HK2	-	Zyx	9	3.32193	abr_avg	9.9774	0.161409	7.38766	0	No	NONE
FBtr0300011	FBgn0036255	3L	A	NTS8	HK2	+	Atg12	38	5.2854	abr_avg	8.69919	0.16171	6.50607	0	No	NONE
FBtr0089207	FBgn0039928	4	A	NTS8	HK2	-	Cals	5	2.58496	abr_avg	10.7961	0.162465	6.41962	0	No	NONE
FBtr0077457	FBgn0027609	2L	A	NTS8	HK2	-	morgue	26	4.75489	abr_avg	7.76139	0.163697	6.63279	0	No	NONE
FBtr0079651	FBgn0032032	2L	A	NTS8	HK2	+	CG17294	3	2	abr_avg	7.47426	0.163966	4.38742	0	No	NONE
FBtr0082091	FBgn0037734	3R	A	NTS8	HK2	-	trbd	56	5.83289	abr_avg	7.29483	0.164996	5.18278	0	No	NONE
FBtr0086506	FBgn0010434	2R	A	NTS8	HK2	+	cora	10	3.45943	abr_avg	9.18642	0.167603	5.66705	0	No	NONE
FBtr0078661	FBgn0037391	3R	A	NTS8	HK2	-	CG2017	21	4.45943	abr_avg	9.2337	0.169487	8.51449	0	No	NONE
FBtr0089086	FBgn0025936	4	A	NTS8	HK2	+	Eph	4	2.32193	abr_avg	8.78117	0.169493	6.45292	0	No	NONE
FBtr0083754	FBgn0038678	3R	A	NTS8	HK2	-	mRpL55	7	3	abr_avg	8.86619	0.170697	6.43362	0	No	NONE
FBtr0080187	FBgn0032305	2L	A	NTS8	HK2	-	CG6700	9	3.32193	abr_avg	9.54874	0.171005	6.2723	0	No	NONE
FBtr0086125	FBgn0028579	2R	A	NTS8	HK2	+	phtf	80	6.33985	abr_avg	8.78533	0.171372	8.68112	0	No	NONE
FBtr0082174	FBgn0037780	3R	A	NTS8	HK2	+	CG3925	60	5.93074	abr_avg	7.66341	0.175998	7.34818	0	No	NONE
FBtr0300783	FBgn0036134	3L	A	NTS8	HK2	-	fd68A	16	4.08746	abr_avg	9.21798	0.176656	6.98965	0	No	NONE
FBtr0089090	FBgn0024728	4	A	NTS8	HK2	+	Slip1	11	3.58496	abr_avg	9.34396	0.178343	7.24975	0	No	NONE
FBtr0079653	FBgn0032036	2L	A	NTS8	HK2	+	CG13384	4	2.32193	abr_avg	9.25662	0.179098	6.37106	0	No	NONE
FBtr0083286	FBgn0038424	3R	A	NTS8	HK2	+	CG17565	31	5	abr_avg	7.83613	0.179314	6.76333	0	No	NONE
FBtr0078459	FBgn0037120	3L	A	NTS8	HK2	-	CG11247	12	3.70044	abr_avg	9.45709	0.180292	7.50976	1	Yes	SAME
FBtr0085608	FBgn0039730	3R	A	NTS8	HK2	-	CG7903	16	4.08746	abr_avg	7.60166	0.180667	5.3684	0	No	NONE
FBtr0091489	FBgn0053526	2L	A	NTS8	HK2	+	PNUTS	7	3	abr_avg	8.91577	0.181458	4.75717	0	No	NONE
FBtr0072708	FBgn0028577	3L	A	NTS8	HK2	-	pUf68	5	2.58496	abr_avg	9.67519	0.183809	6.29516	0	No	NONE
FBtr0085122	FBgn0042111	3R	A	NTS8	HK2	-	CG18766	7	3	abr_avg	8.151	0.184055	5.109	0	No	NONE
FBtr0084562	FBgn0043884	3R	A	NTS8	HK2	+	mask	22	4.52356	abr_avg	9.59772	0.184647	5.38794	0	No	NONE
FBtr0082070	FBgn0261049	3R	A	NTS8	HK2	+	Vps45	3	2	abr_avg	6.93276	0.187099	4.88466	0	No	NONE
FBtr0083691	FBgn0051224	3R	A	NTS8	HK2	-	CG31224	23	4.58496	abr_avg	8.95201	0.187715	5.34119	0	No	NONE
FBtr0072670	FBgn0035207	3L	A	NTS8	HK2	+	CG9153	40	5.35755	abr_avg	8.14604	0.188126	7.39373	0	No	NONE
FBtr0089673	FBgn0027780	2L	A	NTS8	HK2	-	U26	0	0	abr_avg	6.34954	0.193458	2.01066	0	No	NONE
FBtr0074963	FBgn0036896	3L	A	NTS8	HK2	-	wnd	1	1	abr_avg	8.77759	0.195129	3.75479	0	No	NONE
FBtr0077174	FBgn0052423	3L	A	NTS8	HK2	-	shep	6	2.80735	abr_avg	8.95751	0.195146	5.42886	0	No	NONE
FBtr0085351	FBgn0015589	3R	A	NTS8	HK2	-	Apc	9	3.32193	abr_avg	9.8298	0.196878	6.59244	0	No	NONE
FBtr0084699	FBgn0039229	3R	A	NTS8	HK2	+	Saf-B	14	3.90689	abr_avg	8.9658	0.19724	6.14724	0	No	NONE
FBtr0086921	FBgn0028953	2R	A	NTS8	HK2	+	CG14478	12	3.70044	abr_avg	9.34336	0.197263	5.29751	0	No	NONE
FBtr0087858	FBgn0086904	2R	A	NTS8	HK2	-	Nacalpha	227	7.83289	acg_avg	12.189	0.0629946	9.77954	0	No	NONE
FBtr0112393	FBgn0085229	2R	A	NTS8	HK2	+	CG34200	86	6.44294	acg_avg	9.88706	0.0635155	9.88471	2	Yes	MULTI
FBtr0334985	FBgn0040007	2R	A	NTS8	HK2	-	RpL38	177	7.47573	acg_avg	13.2617	0.0675624	10.2062	0	No	NONE
FBtr0076892	FBgn0035753	3L	A	NTS8	HK2	-	RpL18	231	7.85798	acg_avg	12.8328	0.0686662	9.60266	0	No	NONE
FBtr0080017	FBgn0025366	2L	A	NTS8	HK2	+	Ip259	37	5.24793	acg_avg	11.732	0.0730302	8.21161	0	No	NONE
FBtr0077960	FBgn0031310	2L	A	NTS8	HK2	+	CG4764	24	4.64386	acg_avg	8.14197	0.0761492	7.79631	0	No	NONE
FBtr0072174	FBgn0034968	2R	A	NTS8	HK2	+	RpL12	201	7.65821	acg_avg	12.9085	0.0781892	9.54494	0	No	NONE
FBtr0079888	FBgn0011272	2L	A	NTS8	HK2	+	RpL13	106	6.74147	acg_avg	12.9498	0.0794939	9.39714	0	No	NONE
FBtr0342637	FBgn0032518	2L	A	NTS8	HK2	-	RpL24	453	8.82655	acg_avg	12.6258	0.0809233	9.65168	0	No	NONE
FBtr0087579	FBgn0033902	2R	A	NTS8	HK2	-	Tango7	73	6.20945	acg_avg	11.1389	0.0815398	8.49567	0	No	NONE
FBtr0076398	FBgn0045823	3L	A	NTS8	HK2	+	vsg	395	8.62936	acg_avg	11.6049	0.0854262	8.57519	0	No	NONE
FBtr0073082	FBgn0035440	3L	A	NTS8	HK2	-	CG14969	15	4	acg_avg	7.52056	0.0873691	6.10516	0	No	NONE
FBtr0080065	FBgn0005322	2L	A	NTS8	HK2	-	nmd	32	5.04439	acg_avg	9.42642	0.0873877	7.89069	0	No	NONE
FBtr0340319	FBgn0086710	2L	A	NTS8	HK2	-	RpL30	271	8.08746	acg_avg	12.8123	0.0899506	9.12459	0	No	NONE
FBtr0082239	FBgn0037808	3R	A	NTS8	HK2	-	Bruce	10	3.45943	acg_avg	7.88442	0.0921705	7.80674	0	No	NONE
FBtr0079905	FBgn0004867	2L	A	NTS8	HK2	-	RpS2	230	7.85175	acg_avg	12.985	0.0923307	9.7363	0	No	NONE
FBtr0079053	FBgn0015834	2L	A	NTS8	HK2	-	Trip1	41	5.39232	acg_avg	11.6828	0.0927017	8.64558	0	No	NONE
FBtr0078707	FBgn0051549	3R	A	NTS8	HK2	+	CG31549	41	5.39232	acg_avg	9.09938	0.0943337	8.39863	0	No	NONE
FBtr0304117	FBgn0032246	2L	A	NTS8	HK2	+	CG5168	40	5.35755	acg_avg	10.5989	0.0944417	8.67957	0	No	NONE
FBtr0076022	FBgn0036258	3L	A	NTS8	HK2	-	CG5642	121	6.93074	acg_avg	11.335	0.0949803	8.97635	0	No	NONE
FBtr0088387	FBgn0027619	2R	A	NTS8	HK2	+	Adam	99	6.64386	acg_avg	10.5021	0.0964378	9.21251	0	No	NONE
FBtr0079030	FBgn0022023	2L	A	NTS8	HK2	-	eIF-3p40	101	6.67243	acg_avg	11.2363	0.0974135	8.72379	0	No	NONE
FBtr0088955	FBgn0033191	2R	A	NTS8	HK2	-	CG1598	74	6.22882	acg_avg	9.66065	0.0977859	8.48648	0	No	NONE
FBtr0075345	FBgn0025582	3L	A	NTS8	HK2	-	Int6	142	7.15987	acg_avg	11.1014	0.0994831	8.64105	0	No	NONE
FBtr0076217	FBgn0052076	3L	A	NTS8	HK2	+	Alg10	6	2.80735	acg_avg	7.83024	0.101729	7.19934	1	Yes	SAME
FBtr0300813	FBgn0024814	3L	A	NTS8	HK2	+	Clc	74	6.22882	acg_avg	11.1337	0.102327	8.28066	0	No	NONE
FBtr0086079	FBgn0033010	2R	A	NTS8	HK2	+	Atf6	2	1.58496	acg_avg	8.64262	0.105307	5.13766	0	No	NONE
FBtr0086211	FBgn0022224	2R	A	NTS8	HK2	-	ubl	46	5.55459	acg_avg	9.34043	0.111386	7.2262	0	No	NONE
FBtr0302597	FBgn0003261	3R	A	NTS8	HK2	-	Rm62	42	5.42626	acg_avg	11.6179	0.114953	9.04865	0	No	NONE
FBtr0081568	FBgn0037478	3R	A	NTS8	HK2	+	CG2656	15	4	acg_avg	7.76684	0.115106	6.96165	0	No	NONE
FBtr0086684	FBgn0034345	2R	A	NTS8	HK2	+	CG5174	44	5.49185	acg_avg	10.6897	0.12216	8.66577	0	No	NONE
FBtr0086230	FBgn0034534	2R	A	NTS8	HK2	+	maf-S	195	7.61471	acg_avg	10.879	0.122201	9.07288	0	No	NONE
FBtr0087941	FBgn0033751	2R	A	NTS8	HK2	-	CG8818	34	5.12928	acg_avg	9.21619	0.123751	7.6359	0	No	NONE
FBtr0076717	FBgn0027569	3L	A	NTS8	HK2	-	cert	9	3.32193	acg_avg	10.0306	0.124917	7.24134	0	No	NONE
FBtr0086941	FBgn0034237	2R	A	NTS8	HK2	+	eIF3-S9	84	6.40939	acg_avg	12.0891	0.12633	8.97596	0	No	NONE
FBtr0300649	FBgn0028473	2R	A	NTS8	HK2	-	CG8801	66	6.06609	acg_avg	11.7526	0.128877	6.78358	0	No	NONE
FBtr0340269	FBgn0034258	2R	A	NTS8	HK2	+	eIF3-S8	83	6.39232	acg_avg	10.4933	0.133358	6.99643	0	No	NONE
FBtr0085437	FBgn0015622	3R	A	NTS8	HK2	-	Cnx99A	152	7.25739	acg_avg	11.3851	0.135075	10.0839	0	No	NONE
FBtr0076706	FBgn0035867	3L	A	NTS8	HK2	+	CG13671	3	2	acg_avg	6.96305	0.136496	4.01101	0	No	NONE
FBtr0071933	FBgn0034753	2R	A	NTS8	HK2	-	CG2852	335	8.39232	acg_avg	12.896	0.137002	10.1375	0	No	NONE
FBtr0083758	FBgn0038704	3R	A	NTS8	HK2	+	CG5316	36	5.20945	acg_avg	8.50961	0.137911	7.65809	0	No	NONE
FBtr0079839	FBgn0040070	2L	A	NTS8	HK2	+	Trx-2	21	4.45943	acg_avg	11.604	0.138629	7.65221	0	No	NONE
FBtr0079540	FBgn0031979	2L	A	NTS8	HK2	+	CG7429	46	5.55459	acg_avg	7.07506	0.140673	6.70798	0	No	NONE
FBtr0086961	FBgn0034214	2R	A	NTS8	HK2	-	CG6550	4	2.32193	acg_avg	7.8587	0.142589	5.22385	0	No	NONE
FBtr0071670	FBgn0034654	2R	A	NTS8	HK2	+	CG10306	207	7.70044	acg_avg	11.1152	0.144646	8.79897	0	No	NONE
FBtr0088058	FBgn0033663	2R	A	NTS8	HK2	-	ERp60	580	9.18239	acg_avg	12.6582	0.148566	10.2615	0	No	NONE
FBtr0079493	FBgn0031950	2L	A	NTS8	HK2	-	Herp	33	5.08746	acg_avg	10.7871	0.148959	9.17707	0	No	NONE
FBtr0082354	FBgn0037885	3R	A	NTS8	HK2	+	CG17721	2	1.58496	acg_avg	7.61808	0.15361	6.75807	0	No	NONE
FBtr0075184	FBgn0036745	3L	A	NTS8	HK2	+	CG7484	36	5.20945	acg_avg	10.2875	0.155325	7.46589	0	No	NONE
FBtr0075624	FBgn0036460	3L	A	NTS8	HK2	+	CG5114	24	4.64386	acg_avg	8.59179	0.156318	7.49605	0	No	NONE
FBtr0088212	FBgn0033540	2R	A	NTS8	HK2	+	Elp2	4	2.32193	acg_avg	7.09142	0.159775	5.28577	0	No	NONE
FBtr0083426	FBgn0038473	3R	A	NTS8	HK2	-	Ns1	11	3.58496	acg_avg	8.77489	0.159883	6.19478	0	No	NONE
FBtr0077815	FBgn0031379	2L	A	NTS8	HK2	+	CG7289	75	6.24793	acg_avg	8.79685	0.16011	8.27424	0	No	NONE
FBtr0075547	FBgn0036500	3L	A	NTS8	HK2	+	CG7275	14	3.90689	acg_avg	7.99437	0.160419	5.92203	0	No	NONE
FBtr0335026	FBgn0038535	3R	A	NTS8	HK2	-	alt	63	6	acg_avg	9.28241	0.161508	7.24881	0	No	NONE
FBtr0334615	FBgn0027549	3L	A	NTS8	HK2	+	CG7927	91	6.52356	acg_avg	9.63958	0.162521	9.46831	0	No	NONE
FBtr0078955	FBgn0027866	3R	A	NTS8	HK2	-	CG9776	31	5	acg_avg	8.70526	0.163355	8.06916	0	No	NONE
FBtr0083992	FBgn0038830	3R	A	NTS8	HK2	-	CG17272	5	2.58496	acg_avg	10.2141	0.163469	6.24869	0	No	NONE
FBtr0073034	FBgn0052281	3L	A	NTS8	HK2	+	CG32281	5	2.58496	acg_avg	7.4605	0.164113	7.13166	0	No	NONE
FBtr0334618	FBgn0005585	3R	A	NTS8	HK2	-	Crc	621	9.28077	acg_avg	12.9901	0.168543	8.82856	0	No	NONE
FBtr0301278	FBgn0259152	3R	A	NTS8	HK2	+	Clbn	3	2	acg_avg	8.93945	0.168949	6.31297	0	No	NONE
FBtr0336740	FBgn0033117	2R	A	NTS8	HK2	+	CG3358	5	2.58496	acg_avg	7.41439	0.169621	4.24593	0	No	NONE
FBtr0301139	FBgn0035944	3L	A	NTS8	HK2	+	CG5021	39	5.32193	acg_avg	11.1743	0.170874	8.139	0	No	NONE
FBtr0084555	FBgn0039165	3R	A	NTS8	HK2	+	CG6204	3	2	acg_avg	7.55878	0.17224	5.63763	0	No	NONE
FBtr0084760	FBgn0039265	3R	A	NTS8	HK2	+	CG11790	18	4.24793	acg_avg	10.486	0.17327	6.76881	0	No	NONE
FBtr0113101	FBgn0034645	2R	A	NTS8	HK2	+	CG10320	248	7.96	acg_avg	6.00745	0.173777	3.44025	0	No	NONE
FBtr0084049	FBgn0038868	3R	A	NTS8	HK2	+	CG5862	55	5.80735	acg_avg	9.81477	0.175603	8.31713	0	No	NONE
FBtr0076403	FBgn0036038	3L	A	NTS8	HK2	+	defl	2	1.58496	acg_avg	6.65781	0.175986	4.51445	0	No	NONE
FBtr0308693	FBgn0031245	2L	A	NTS8	HK2	-	CG3625	11	3.58496	acg_avg	11.3326	0.177966	8.28213	0	No	NONE
FBtr0331435	FBgn0031603	2L	A	NTS8	HK2	+	CG15432	48	5.61471	acg_avg	7.90725	0.178001	5.87762	0	No	NONE
FBtr0332077	FBgn0036342	3L	A	NTS8	HK2	+	CG11279	23	4.58496	acg_avg	9.25512	0.178756	7.38515	0	No	NONE
FBtr0076770	FBgn0035825	3L	A	NTS8	HK2	-	CG8111	16	4.08746	acg_avg	7.30614	0.178918	6.42155	0	No	NONE
FBtr0339535	FBgn0022985	2R	A	NTS8	HK2	+	qkr58E-2	46	5.55459	acg_avg	9.74523	0.178959	5.48466	0	No	NONE
FBtr0080705	FBgn0001978	2L	A	NTS8	HK2	+	stc	32	5.04439	acg_avg	9.26973	0.179359	8.40127	0	No	NONE
FBtr0086827	FBgn0034242	2R	A	NTS8	HK2	+	CG14480	306	8.26209	acg_avg	5.30254	0.180419	1.46595	0	No	NONE
FBtr0113139	FBgn0035541	3L	A	NTS8	HK2	-	CG15019	13	3.80735	acg_avg	9.80623	0.180813	5.66277	0	No	NONE
FBtr0077121	FBgn0035630	3L	A	NTS8	HK2	-	CG10576	208	7.70736	acg_avg	10.1632	0.182046	8.70513	0	No	NONE
FBtr0076124	FBgn0036196	3L	A	NTS8	HK2	-	CG11658	23	4.58496	acg_avg	7.76933	0.182496	7.37402	1	Yes	SAME
FBtr0081986	FBgn0260935	3R	A	NTS8	HK2	-	ird1	3	2	acg_avg	7.60499	0.182689	4.26236	0	No	NONE
FBtr0074990	FBgn0260857	3L	A	NTS8	HK2	+	Bet1	41	5.39232	acg_avg	9.84564	0.182731	7.69385	0	No	NONE
FBtr0085253	FBgn0039560	3R	A	NTS8	HK2	+	CG5514	53	5.75489	acg_avg	7.42129	0.186879	7.33118	0	No	NONE
FBtr0072537	FBgn0035102	3L	A	NTS8	HK2	-	CG7049	4	2.32193	acg_avg	8.40589	0.187302	6.0449	0	No	NONE
FBtr0083480	FBgn0051360	3R	A	NTS8	HK2	+	CG31360	179	7.49185	acg_avg	8.84892	0.187861	8.58196	0	No	NONE
FBtr0081697	FBgn0024912	3R	A	NTS8	HK2	-	agt	4	2.32193	acg_avg	6.831	0.188516	2.93072	0	No	NONE
FBtr0082431	FBgn0037943	3R	A	NTS8	HK2	+	CG14722	34	5.12928	acg_avg	8.17206	0.191183	6.56013	0	No	NONE
FBtr0085410	FBgn0041588	3R	A	NTS8	HK2	-	ligatin	29	4.90689	acg_avg	7.5744	0.192065	6.24455	0	No	NONE
FBtr0088674	FBgn0027607	2R	A	NTS8	HK2	-	CG8230	24	4.64386	acg_avg	10.078	0.192561	7.62597	0	No	NONE
FBtr0071589	FBgn0034611	2R	A	NTS8	HK2	+	MFS16	7	3	acg_avg	10.5442	0.193096	6.9386	0	No	NONE
FBtr0088684	FBgn0033341	2R	A	NTS8	HK2	-	MrgBP	48	5.61471	acg_avg	9.05295	0.193605	6.94741	0	No	NONE
FBtr0082371	FBgn0037875	3R	A	NTS8	HK2	-	CG6672	21	4.45943	acg_avg	9.61298	0.19386	6.36978	0	No	NONE
FBtr0332318	FBgn0032787	2L	A	NTS8	HK2	-	CG10195	1	1	acg_avg	8.39592	0.194094	3.75394	0	No	NONE
FBtr0082248	FBgn0037815	3R	A	NTS8	HK2	+	Rrp46	1	1	acg_avg	7.54422	0.197591	4.4672	0	No	NONE
FBtr0083051	FBgn0038304	3R	A	NTS8	HK2	+	CG12241	29	4.90689	acg_avg	9.12526	0.19983	7.95755	0	No	NONE
FBtr0343115	FBgn0025608	2L	A	NTS8	HK2	-	Faf	110	6.79442	acr_avg	8.95555	0.0509722	8.57235	0	No	NONE
FBtr0080290	FBgn0032393	2L	A	NTS8	HK2	+	CG12264	24	4.64386	acr_avg	8.94314	0.06359	7.55327	0	No	NONE
FBtr0300293	FBgn0033413	2R	A	NTS8	HK2	+	prel	36	5.20945	acr_avg	9.91698	0.0806188	9.10537	0	No	NONE
FBtr0080088	FBgn0024248	2L	A	NTS8	HK2	-	chico	4	2.32193	acr_avg	8.08788	0.0828343	5.33031	0	No	NONE
FBtr0088115	FBgn0041174	2R	A	NTS8	HK2	+	Vhl	1	1	acr_avg	8.14833	0.0928969	3.83563	0	No	NONE
FBtr0301008	FBgn0052221	3L	A	NTS8	HK2	+	CG32221	18	4.24793	acr_avg	7.59701	0.0966285	7.31662	0	No	NONE
FBtr0083240	FBgn0038388	3R	A	NTS8	HK2	-	CG4287	21	4.45943	acr_avg	8.87088	0.096653	8.34983	0	No	NONE
FBtr0076690	FBgn0035848	3L	A	NTS8	HK2	+	CG7979	17	4.16993	acr_avg	8.67984	0.0994499	6.06448	0	No	NONE
FBtr0084660	FBgn0000139	3R	A	NTS8	HK2	+	ash2	8	3.16993	acr_avg	8.20877	0.107065	6.18018	0	No	NONE
FBtr0076654	FBgn0035906	3L	A	NTS8	HK2	-	GstO2	40	5.35755	acr_avg	10.4619	0.115546	8.83807	0	No	NONE
FBtr0075521	FBgn0036556	3L	A	NTS8	HK2	-	CG5830	2	1.58496	acr_avg	8.95921	0.119363	5.24208	0	No	NONE
FBtr0072195	FBgn0034958	2R	A	NTS8	HK2	-	CG3907	14	3.90689	acr_avg	9.51984	0.12114	6.53366	0	No	NONE
FBtr0305210	FBgn0260442	3L	A	NTS8	HK2	+	rhea	13	3.80735	acr_avg	10.8307	0.122663	7.68806	0	No	NONE
FBtr0076344	FBgn0036059	3L	A	NTS8	HK2	+	nudE	45	5.52356	acr_avg	9.33101	0.123505	6.28505	0	No	NONE
FBtr0078238	FBgn0027565	3L	A	NTS8	HK2	-	CG5498	12	3.70044	acr_avg	7.8853	0.128846	6.609	0	No	NONE
FBtr0087492	FBgn0001332	2R	A	NTS8	HK2	+	L	5	2.58496	acr_avg	10.1252	0.131315	5.75064	0	No	NONE
FBtr0078083	FBgn0043364	2L	A	NTS8	HK2	-	cbt	2	1.58496	acr_avg	10.4765	0.133202	5.45381	0	No	NONE
FBtr0342602	FBgn0032407	2L	A	NTS8	HK2	+	Pex19	35	5.16993	acr_avg	10.012	0.133407	7.28812	0	No	NONE
FBtr0089518	FBgn0000083	3R	A	NTS8	HK2	+	AnxB9	30	4.9542	acr_avg	11.7059	0.144175	7.75984	0	No	NONE
FBtr0076543	FBgn0000116	3L	A	NTS8	HK2	-	Argk	127	7	acr_avg	12.2609	0.144765	9.48325	0	No	NONE
FBtr0075161	FBgn0036760	3L	A	NTS8	HK2	-	CG5567	39	5.32193	acr_avg	9.24632	0.148013	7.38747	1	Yes	SAME
FBtr0079642	FBgn0031987	2L	A	NTS8	HK2	-	CG12375	17	4.16993	acr_avg	9.543	0.152866	6.3063	0	No	NONE
FBtr0081844	FBgn0020249	3R	A	NTS8	HK2	+	stck	46	5.55459	acr_avg	11.1427	0.153477	7.50638	0	No	NONE
FBtr0080024	FBgn0032247	2L	A	NTS8	HK2	+	CG5188	6	2.80735	acr_avg	6.98028	0.154166	5.35986	0	No	NONE
FBtr0083819	FBgn0014006	3R	A	NTS8	HK2	+	Pk92B	6	2.80735	acr_avg	8.62134	0.156647	5.77551	0	No	NONE
FBtr0078803	FBgn0037315	3R	A	NTS8	HK2	-	Cerk	25	4.70044	acr_avg	9.29477	0.16092	7.5918	0	No	NONE
FBtr0072578	FBgn0000575	3L	A	NTS8	HK2	+	emc	4	2.32193	acr_avg	10.6974	0.162778	5.86636	0	No	NONE
FBtr0113236	FBgn0038286	3R	A	NTS8	HK2	-	CG6966	16	4.08746	acr_avg	9.02922	0.163059	7.35417	0	No	NONE
FBtr0084580	FBgn0015765	3R	A	NTS8	HK2	-	Mpk2	6	2.80735	acr_avg	8.78393	0.164674	7.36318	0	No	NONE
FBtr0078155	FBgn0025683	2L	A	NTS8	HK2	-	CG3164	18	4.24793	acr_avg	12.0801	0.165001	7.04592	0	No	NONE
FBtr0082418	FBgn0037924	3R	A	NTS8	HK2	+	CG14712	61	5.9542	acr_avg	6.20959	0.166987	2.81059	0	No	NONE
FBtr0078305	FBgn0028427	3L	A	NTS8	HK2	+	Ilk	4	2.32193	acr_avg	9.80183	0.167393	6.06544	0	No	NONE
FBtr0086245	FBgn0034542	2R	A	NTS8	HK2	-	Fem-1	7	3	acr_avg	8.98624	0.171363	6.90005	0	No	NONE
FBtr0082947	FBgn0003862	3R	A	NTS8	HK2	-	trx	1	1	acr_avg	9.1031	0.171421	4.4558	0	No	NONE
FBtr0304975	FBgn0036534	3L	A	NTS8	HK2	-	Dcp2	24	4.64386	acr_avg	7.39533	0.171762	5.86114	1	Yes	DIFF
FBtr0089023	FBgn0033127	2R	A	NTS8	HK2	+	Tsp42Ef	11	3.58496	acr_avg	9.14193	0.176208	5.40625	0	No	NONE
FBtr0077095	FBgn0016756	3L	A	NTS8	HK2	+	Ubp64E	102	6.6865	acr_avg	9.92534	0.178745	9.55363	0	No	NONE
FBtr0332972	FBgn0031282	2L	A	NTS8	HK2	+	Pex12	1	1	acr_avg	7.15069	0.180609	2.99563	0	No	NONE
FBtr0078339	FBgn0037071	3L	A	NTS8	HK2	+	CG7632	3	2	acr_avg	7.91642	0.182722	5.25183	0	No	NONE
FBtr0079745	FBgn0003209	2L	A	NTS8	HK2	-	raw	3	2	acr_avg	9.86721	0.182943	5.75366	0	No	NONE
FBtr0073212	FBgn0003206	3L	A	NTS8	HK2	+	Ras64B	37	5.24793	acr_avg	10.898	0.186355	6.90267	0	No	NONE
FBtr0076130	FBgn0036194	3L	A	NTS8	HK2	-	CG11652	11	3.58496	acr_avg	8.13349	0.186748	6.56424	0	No	NONE
FBtr0306619	FBgn0013718	3L	A	NTS8	HK2	+	nuf	11	3.58496	acr_avg	10.8165	0.186975	7.04337	0	No	NONE
FBtr0076278	FBgn0052066	3L	A	NTS8	HK2	-	CG32066	17	4.16993	acr_avg	9.32168	0.188923	5.95168	0	No	NONE
FBtr0085215	FBgn0039537	3R	A	NTS8	HK2	+	CG5590	25	4.70044	acr_avg	10.2689	0.189192	6.35075	0	No	NONE
FBtr0302120	FBgn0020304	2L	A	NTS8	HK2	-	drongo	22	4.52356	acr_avg	10.4016	0.192287	7.17664	0	No	NONE
FBtr0080018	FBgn0032243	2L	A	NTS8	HK2	+	Klp31E	3	2	acr_avg	8.12977	0.192748	4.98505	0	No	NONE
FBtr0332800	FBgn0014011	3L	A	NTS8	HK2	-	Rac2	9	3.32193	acr_avg	9.36047	0.197252	4.86336	0	No	NONE
FBtr0301056	FBgn0260941	3L	A	NTS8	HK2	-	app	10	3.45943	acr_avg	9.28507	0.199419	5.82572	0	No	NONE
FBtr0078744	FBgn0250753	3R	A	NTS8	HK2	-	exba	225	7.82018	aeye_avg	11.175	0.0487102	10.609	0	No	NONE
FBtr0080465	FBgn0032509	2L	A	NTS8	HK2	+	CG6523	172	7.43463	aeye_avg	9.53285	0.0631609	8.06068	0	No	NONE
FBtr0088274	FBgn0033529	2R	A	NTS8	HK2	+	CG17765	84	6.40939	aeye_avg	9.9598	0.0638047	8.71701	0	No	NONE
FBtr0088647	FBgn0004921	2R	A	NTS8	HK2	+	Ggamma1	114	6.84549	aeye_avg	11.7453	0.067289	9.80635	0	No	NONE
FBtr0089553	FBgn0026316	2R	A	NTS8	HK2	-	UbcD10	98	6.62936	aeye_avg	8.90047	0.0682656	8.07553	0	No	NONE
FBtr0082751	FBgn0038145	3R	A	NTS8	HK2	+	Droj2	518	9.01959	aeye_avg	11.1975	0.0684196	10.787	0	No	NONE
FBtr0081301	FBgn0032833	2L	A	NTS8	HK2	+	CoIV	160	7.33092	aeye_avg	12.1911	0.0704887	8.65315	0	No	NONE
FBtr0333560	FBgn0036581	3L	A	NTS8	HK2	+	MED10	18	4.24793	aeye_avg	9.40562	0.073549	7.52952	0	No	NONE
FBtr0072177	FBgn0025806	2R	A	NTS8	HK2	+	Rap2l	31	5	aeye_avg	9.75546	0.0775725	9.07231	0	No	NONE
FBtr0273393	FBgn0031436	2L	A	NTS8	HK2	-	CG3214	148	7.21917	aeye_avg	10.3594	0.0872521	8.77805	0	No	NONE
FBtr0083712	FBgn0027785	3R	A	NTS8	HK2	+	NP15.6	191	7.58496	aeye_avg	11.2096	0.0884675	9.08351	0	No	NONE
FBtr0080850	FBgn0015338	2L	A	NTS8	HK2	-	CG5861	40	5.35755	aeye_avg	9.07368	0.0893774	7.54462	0	No	NONE
FBtr0078785	FBgn0037313	3R	A	NTS8	HK2	+	CG1161	25	4.70044	aeye_avg	10.4147	0.089438	7.35326	0	No	NONE
FBtr0084526	FBgn0013347	3R	A	NTS8	HK2	-	TfIIA-S	217	7.76818	aeye_avg	9.5929	0.0945402	8.07148	0	No	NONE
FBtr0110817	FBgn0083953	3R	A	NTS8	HK2	-	CG34117	86	6.44294	aeye_avg	8.36913	0.0950405	7.76519	0	No	NONE
FBtr0087739	FBgn0040754	2R	A	NTS8	HK2	+	CG17059	19	4.32193	aeye_avg	9.90479	0.0958029	6.88543	0	No	NONE
FBtr0086027	FBgn0033052	2R	A	NTS8	HK2	-	SCAP	3	2	aeye_avg	8.52942	0.0959002	5.10893	0	No	NONE
FBtr0088247	FBgn0033556	2R	A	NTS8	HK2	-	CG12343	100	6.65821	aeye_avg	8.5334	0.096846	8.32311	0	No	NONE
FBtr0083281	FBgn0038400	3R	A	NTS8	HK2	-	CG5903	148	7.21917	aeye_avg	11.054	0.0978947	9.74243	0	No	NONE
FBtr0329905	FBgn0031505	2L	A	NTS8	HK2	-	CG12400	82	6.37504	aeye_avg	10.8582	0.0981189	8.28471	0	No	NONE
FBtr0331653	FBgn0025681	2L	A	NTS8	HK2	+	CG3558	25	4.70044	aeye_avg	7.47177	0.0983418	6.95318	0	No	NONE
FBtr0335125	FBgn0031453	2L	A	NTS8	HK2	+	Bacc	6	2.80735	aeye_avg	11.4927	0.0983787	6.80802	0	No	NONE
FBtr0079730	FBgn0260861	2L	A	NTS8	HK2	+	Trs23	12	3.70044	aeye_avg	7.6987	0.099302	6.19692	0	No	NONE
FBtr0085366	FBgn0039635	3R	A	NTS8	HK2	+	CG11876	235	7.88264	aeye_avg	10.3982	0.101131	10.2235	1	Yes	SAME
FBtr0078758	FBgn0086768	3R	A	NTS8	HK2	-	Pcmt	54	5.78136	aeye_avg	9.29037	0.102818	8.47357	0	No	NONE
FBtr0306855	FBgn0036537	3L	A	NTS8	HK2	-	CG18081	116	6.87036	aeye_avg	9.99696	0.103178	8.29716	0	No	NONE
FBtr0304963	FBgn0000253	2R	A	NTS8	HK2	+	Cam	50	5.67243	aeye_avg	12.3663	0.107565	10.491	0	No	NONE
FBtr0076752	FBgn0010406	3L	A	NTS8	HK2	+	RNaseX25	14	3.90689	aeye_avg	9.42232	0.10831	7.94388	0	No	NONE
FBtr0071530	FBgn0034576	2R	A	NTS8	HK2	+	CG9350	82	6.37504	aeye_avg	11.057	0.108679	8.31913	0	No	NONE
FBtr0077964	FBgn0031315	2L	A	NTS8	HK2	+	CG14341	26	4.75489	aeye_avg	8.23879	0.108697	6.29259	0	No	NONE
FBtr0082869	FBgn0038195	3R	A	NTS8	HK2	+	CG3061	112	6.82018	aeye_avg	10.9256	0.108869	8.29886	1	Yes	DIFF
FBtr0078577	FBgn0037199	3L	A	NTS8	HK2	-	CG11137	83	6.39232	aeye_avg	10.5892	0.109459	9.31342	0	No	NONE
FBtr0072901	FBgn0035333	3L	A	NTS8	HK2	-	CG1317	113	6.83289	aeye_avg	9.49124	0.11093	6.49676	0	No	NONE
FBtr0083099	FBgn0041188	3R	A	NTS8	HK2	+	Atx2	28	4.85798	aeye_avg	10.1834	0.112573	7.68083	0	No	NONE
FBtr0081135	FBgn0032732	2L	A	NTS8	HK2	+	CG15168	40	5.35755	aeye_avg	9.00158	0.114136	8.27561	0	No	NONE
FBtr0088694	FBgn0022027	2R	A	NTS8	HK2	+	Vps25	94	6.56986	aeye_avg	8.61685	0.117656	7.53906	0	No	NONE
FBtr0087290	FBgn0034050	2R	A	NTS8	HK2	+	CG8297	31	5	aeye_avg	6.79913	0.12052	6.31563	1	Yes	DIFF
FBtr0084890	FBgn0027508	3R	A	NTS8	HK2	-	tankyrase	3	2	aeye_avg	7.84037	0.121678	5.62653	0	No	NONE
FBtr0072204	FBgn0034948	2R	A	NTS8	HK2	-	Gadd34	82	6.37504	aeye_avg	9.77518	0.12255	9.0032	0	No	NONE
FBtr0078856	FBgn0037262	3R	A	NTS8	HK2	+	MED31	175	7.45943	aeye_avg	7.91429	0.124193	7.65557	0	No	NONE
FBtr0332706	FBgn0036126	3L	A	NTS8	HK2	-	CG6272	13	3.80735	aeye_avg	8.27747	0.124934	4.82713	0	No	NONE
FBtr0077155	FBgn0035601	3L	A	NTS8	HK2	-	Uev1A	146	7.19967	aeye_avg	11.0772	0.125844	8.66449	0	No	NONE
FBtr0086591	FBgn0034418	2R	A	NTS8	HK2	-	CG15118	39	5.32193	aeye_avg	9.64956	0.127864	8.25097	0	No	NONE
FBtr0081638	FBgn0037469	3R	A	NTS8	HK2	+	Dpck	39	5.32193	aeye_avg	8.22896	0.12837	7.37891	0	No	NONE
FBtr0089797	FBgn0052442	3L	A	NTS8	HK2	-	CG32442	2	1.58496	aeye_avg	7.30419	0.128926	4.70386	0	No	NONE
FBtr0082642	FBgn0038065	3R	A	NTS8	HK2	+	Snx3	77	6.2854	aeye_avg	10.8486	0.130713	9.37415	0	No	NONE
FBtr0079216	FBgn0031771	2L	A	NTS8	HK2	-	CG9140	27	4.80735	aeye_avg	11.2829	0.131839	6.92518	0	No	NONE
FBtr0075918	FBgn0052109	3L	A	NTS8	HK2	+	CG32109	3	2	aeye_avg	7.51376	0.132538	5.34184	0	No	NONE
FBtr0079848	FBgn0032138	2L	A	NTS8	HK2	-	CG4364	99	6.64386	aeye_avg	10.6197	0.13336	6.17449	0	No	NONE
FBtr0087470	FBgn0033962	2R	A	NTS8	HK2	-	CG10153	10	3.45943	aeye_avg	8.53286	0.133751	5.11288	0	No	NONE
FBtr0089876	FBgn0013305	2R	A	NTS8	HK2	-	Nmda1	32	5.04439	aeye_avg	11.6573	0.134791	8.49787	0	No	NONE
FBtr0339475	FBgn0027525	2R	A	NTS8	HK2	-	CG7686	29	4.90689	aeye_avg	11.0639	0.134815	6.97847	0	No	NONE
FBtr0074896	FBgn0036921	3L	A	NTS8	HK2	+	RhoGDI	48	5.61471	aeye_avg	12.1293	0.136096	7.19765	0	No	NONE
FBtr0077796	FBgn0014010	2L	A	NTS8	HK2	-	Rab5	29	4.90689	aeye_avg	11.0727	0.136164	7.59756	0	No	NONE
FBtr0072435	FBgn0035060	2R	A	NTS8	HK2	-	Eps-15	51	5.70044	aeye_avg	7.75401	0.137422	7.71276	0	No	NONE
FBtr0082534	FBgn0017581	3R	A	NTS8	HK2	-	Lk6	77	6.2854	aeye_avg	12.0833	0.140633	8.58878	0	No	NONE
FBtr0072577	FBgn0035155	3L	A	NTS8	HK2	+	RabX6	3	2	aeye_avg	7.26763	0.14084	4.57588	0	No	NONE
FBtr0089597	FBgn0036900	3L	A	NTS8	HK2	-	CG8765	16	4.08746	aeye_avg	7.33034	0.141129	6.0994	0	No	NONE
FBtr0088631	FBgn0033375	2R	A	NTS8	HK2	-	CG8078	6	2.80735	aeye_avg	7.3486	0.141151	4.54436	1	Yes	SAME
FBtr0071958	FBgn0021979	2R	A	NTS8	HK2	+	l(2)k09913	34	5.12928	aeye_avg	11.4363	0.141776	7.54346	0	No	NONE
FBtr0084029	FBgn0038861	3R	A	NTS8	HK2	-	CG7009	10	3.45943	aeye_avg	7.54971	0.142082	5.51424	0	No	NONE
FBtr0301734	FBgn0050077	2R	A	NTS8	HK2	+	blos1	1	1	aeye_avg	7.78509	0.143023	4.58386	0	No	NONE
FBtr0079183	FBgn0031768	2L	A	NTS8	HK2	+	CG12393	25	4.70044	aeye_avg	8.05389	0.144077	6.65515	0	No	NONE
FBtr0080626	FBgn0015791	2L	A	NTS8	HK2	+	Rab14	42	5.42626	aeye_avg	10.1683	0.146842	9.42811	0	No	NONE
FBtr0334668	FBgn0037468	3R	A	NTS8	HK2	+	CG1943	71	6.16993	aeye_avg	11.4202	0.147759	8.60549	0	No	NONE
FBtr0333218	FBgn0020386	3L	A	NTS8	HK2	+	Pdk1	63	6	aeye_avg	9.57857	0.147858	4.86283	1	Yes	DIFF
FBtr0073234	FBgn0015829	3L	A	NTS8	HK2	+	TfIIEbeta	40	5.35755	aeye_avg	8.0981	0.149182	7.43153	0	No	NONE
FBtr0082403	FBgn0037899	3R	A	NTS8	HK2	-	RpL24-like	90	6.50779	aeye_avg	11.2903	0.149958	7.72008	0	No	NONE
FBtr0085483	FBgn0039698	3R	A	NTS8	HK2	+	CG7789	5	2.58496	aeye_avg	7.69781	0.152581	1.88078	0	No	NONE
FBtr0308076	FBgn0037536	3R	A	NTS8	HK2	+	CG2698	18	4.24793	aeye_avg	9.89957	0.15548	8.48841	0	No	NONE
FBtr0088423	FBgn0033486	2R	A	NTS8	HK2	+	CG11866	31	5	aeye_avg	8.86531	0.155575	7.8343	0	No	NONE
FBtr0079291	FBgn0031836	2L	A	NTS8	HK2	+	CG11050	4	2.32193	aeye_avg	10.4435	0.156953	5.15382	0	No	NONE
FBtr0300058	FBgn0052441	3L	A	NTS8	HK2	+	CG32441	48	5.61471	aeye_avg	10.5986	0.157134	8.16351	0	No	NONE
FBtr0080397	FBgn0032451	2L	A	NTS8	HK2	+	spict	9	3.32193	aeye_avg	9.47254	0.159954	6.42918	0	No	NONE
FBtr0084185	FBgn0038925	3R	A	NTS8	HK2	-	Cchl	200	7.65105	aeye_avg	10.2364	0.160102	9.76876	0	No	NONE
FBtr0075599	FBgn0036505	3L	A	NTS8	HK2	-	CG7945	106	6.74147	aeye_avg	9.41783	0.160944	9.19347	0	No	NONE
FBtr0332727	FBgn0036911	3L	A	NTS8	HK2	-	Fibp	6	2.80735	aeye_avg	7.81724	0.161384	5.24177	0	No	NONE
FBtr0079895	FBgn0051713	2L	A	NTS8	HK2	-	Apf	24	4.64386	aeye_avg	8.62372	0.163766	6.2248	0	No	NONE
FBtr0305992	FBgn0022959	3L	A	NTS8	HK2	-	yps	185	7.53916	aeye_avg	11.3137	0.168896	9.82492	0	No	NONE
FBtr0075365	FBgn0036643	3L	A	NTS8	HK2	-	Syx8	33	5.08746	aeye_avg	8.18827	0.170005	5.82095	0	No	NONE
FBtr0085673	FBgn0039790	3R	A	NTS8	HK2	-	CG2246	7	3	aeye_avg	10.1821	0.170601	6.25016	2	Yes	MULTI
FBtr0305555	FBgn0032479	2L	A	NTS8	HK2	-	CG16974	7	3	aeye_avg	9.90569	0.170622	6.09202	0	No	NONE
FBtr0073171	FBgn0027552	3L	A	NTS8	HK2	-	CG10863	155	7.2854	aeye_avg	12.2403	0.173064	9.02855	0	No	NONE
FBtr0079130	FBgn0031708	2L	A	NTS8	HK2	-	CG7382	68	6.10852	aeye_avg	9.68601	0.177557	8.28258	0	No	NONE
FBtr0088594	FBgn0050343	2R	A	NTS8	HK2	+	CG30343	0	0	aeye_avg	7.19286	0.178227	3.50562	0	No	NONE
FBtr0081766	FBgn0037529	3R	A	NTS8	HK2	-	mRpS9	28	4.85798	aeye_avg	10.2862	0.18062	6.67338	0	No	NONE
FBtr0342936	FBgn0016076	2L	A	NTS8	HK2	+	vri	3	2	aeye_avg	9.51547	0.182331	5.43326	0	No	NONE
FBtr0112899	FBgn0020762	2L	A	NTS8	HK2	+	Atet	4	2.32193	aeye_avg	8.36165	0.187903	6.35727	0	No	NONE
FBtr0076748	FBgn0035824	3L	A	NTS8	HK2	+	CG8281	2	1.58496	aeye_avg	5.99146	0.188429	3.80145	0	No	NONE
FBtr0076417	FBgn0016081	3L	A	NTS8	HK2	-	fry	10	3.45943	aeye_avg	9.56126	0.192558	7.58263	0	No	NONE
FBtr0081325	FBgn0032815	2L	A	NTS8	HK2	-	CG10462	1	1	aeye_avg	8.49285	0.192572	5.64705	0	No	NONE
FBtr0305503	FBgn0032955	2L	A	NTS8	HK2	-	CG2201	10	3.45943	aeye_avg	9.7775	0.194728	7.64797	0	No	NONE
FBtr0339636	FBgn0045063	2R	A	NTS8	HK2	-	fdl	20	4.39232	aeye_avg	8.62252	0.194973	5.42719	1	Yes	DIFF
FBtr0111114	FBgn0260799	2R	A	NTS8	HK2	+	p120ctn	11	3.58496	aeye_avg	10.707	0.19766	7.36711	0	No	NONE
FBtr0087568	FBgn0001220	2R	A	NTS8	HK2	-	Hsc70-5	208	7.70736	afb_avg	10.7333	0.0742291	9.84294	1	Yes	SAME
FBtr0072676	FBgn0011361	3L	A	NTS8	HK2	+	mtacp1	105	6.72792	afb_avg	10.5756	0.0818244	8.57929	0	No	NONE
FBtr0072262	FBgn0034989	2R	A	NTS8	HK2	+	CG3356	47	5.58496	afb_avg	8.39701	0.0854319	8.35325	0	No	NONE
FBtr0072343	FBgn0016687	2R	A	NTS8	HK2	-	Nurf-38	91	6.52356	afb_avg	11.1233	0.0869352	8.23909	0	No	NONE
FBtr0076023	FBgn0011455	3L	A	NTS8	HK2	-	l(3)neo18	220	7.7879	afb_avg	11.4061	0.0959904	9.2314	0	No	NONE
FBtr0088997	FBgn0033179	2R	A	NTS8	HK2	-	p47	124	6.96578	afb_avg	9.57396	0.0983139	9.28882	0	No	NONE
FBtr0087788	FBgn0033781	2R	A	NTS8	HK2	+	CG13319	7	3	afb_avg	8.0458	0.104484	6.30217	0	No	NONE
FBtr0072889	FBgn0035334	3L	A	NTS8	HK2	+	CG8993	88	6.47573	afb_avg	9.82358	0.108597	7.17446	0	No	NONE
FBtr0081721	FBgn0037442	3R	A	NTS8	HK2	+	CG10277	43	5.45943	afb_avg	8.69061	0.112808	6.46424	0	No	NONE
FBtr0077412	FBgn0031635	2L	A	NTS8	HK2	-	CG15626	12	3.70044	afb_avg	9.35624	0.113719	7.20051	1	Yes	SAME
FBtr0305675	FBgn0050410	2R	A	NTS8	HK2	+	Rpi	98	6.62936	afb_avg	9.25438	0.11981	8.34178	0	No	NONE
FBtr0071758	FBgn0034694	2R	A	NTS8	HK2	+	CG6613	2	1.58496	afb_avg	7.06233	0.125379	3.97457	0	No	NONE
FBtr0113217	FBgn0037842	3R	A	NTS8	HK2	-	CG6567	24	4.64386	afb_avg	8.29195	0.127067	6.49778	0	No	NONE
FBtr0088975	FBgn0033178	2R	A	NTS8	HK2	+	CG11127	8	3.16993	afb_avg	7.84311	0.128702	5.20871	1	Yes	DIFF
FBtr0084675	FBgn0039209	3R	A	NTS8	HK2	-	CG13624	2	1.58496	afb_avg	7.93791	0.129434	3.99981	0	No	NONE
FBtr0072589	FBgn0052479	3L	A	NTS8	HK2	+	CG32479	17	4.16993	afb_avg	9.32663	0.132761	6.77669	0	No	NONE
FBtr0081957	FBgn0037643	3R	A	NTS8	HK2	+	skap	250	7.97154	afb_avg	11.0731	0.134922	10.7523	0	No	NONE
FBtr0086661	FBgn0034368	2R	A	NTS8	HK2	-	CG5482	141	7.14975	afb_avg	10.2844	0.135146	9.78085	0	No	NONE
FBtr0331544	FBgn0042138	3L	A	NTS8	HK2	+	CG18815	61	5.9542	afb_avg	11.183	0.13663	8.44796	0	No	NONE
FBtr0081414	FBgn0032884	2L	A	NTS8	HK2	+	Pomp	252	7.98299	afb_avg	10.1707	0.144804	7.85471	0	No	NONE
FBtr0088454	FBgn0027580	2R	A	NTS8	HK2	-	CG1516	60	5.93074	afb_avg	12.0983	0.146323	8.94868	0	No	NONE
FBtr0083947	FBgn0023212	3R	A	NTS8	HK2	-	Elongin-B	232	7.86419	afb_avg	11.065	0.148043	8.90722	0	No	NONE
FBtr0082160	FBgn0037749	3R	A	NTS8	HK2	-	CG9471	69	6.12928	afb_avg	9.87875	0.150352	8.55854	0	No	NONE
FBtr0082029	FBgn0037687	3R	A	NTS8	HK2	+	CG8132	2	1.58496	afb_avg	8.92444	0.151748	4.47673	0	No	NONE
FBtr0289939	FBgn0037443	3R	A	NTS8	HK2	-	CG1021	4	2.32193	afb_avg	9.87762	0.160606	6.24804	0	No	NONE
FBtr0082626	FBgn0086687	3R	A	NTS8	HK2	+	desat1	50	5.67243	afb_avg	12.6935	0.162689	8.8419	0	No	NONE
FBtr0072226	FBgn0025352	2R	A	NTS8	HK2	-	Thiolase	29	4.90689	afb_avg	10.7105	0.162843	6.50032	0	No	NONE
FBtr0084459	FBgn0015513	3R	A	NTS8	HK2	+	mbc	2	1.58496	afb_avg	9.08211	0.166363	5.67317	0	No	NONE
FBtr0082519	FBgn0037955	3R	A	NTS8	HK2	-	CG6950	15	4	afb_avg	9.61996	0.170371	6.17468	0	No	NONE
FBtr0333264	FBgn0015806	3L	A	NTS8	HK2	-	S6k	3	2	afb_avg	9.43609	0.170813	4.21113	0	No	NONE
FBtr0078736	FBgn0051548	3R	A	NTS8	HK2	-	CG31548	22	4.52356	afb_avg	10.2034	0.171049	5.15096	0	No	NONE
FBtr0075081	FBgn0036816	3L	A	NTS8	HK2	-	Indy	18	4.24793	afb_avg	12.1579	0.171837	9.28961	0	No	NONE
FBtr0077828	FBgn0004507	2L	A	NTS8	HK2	+	GlyP	18	4.24793	afb_avg	11.3979	0.173496	6.19713	0	No	NONE
FBtr0077987	FBgn0016926	2L	A	NTS8	HK2	-	Pino	22	4.52356	afb_avg	11.1689	0.179652	8.26431	0	No	NONE
FBtr0082583	FBgn0038038	3R	A	NTS8	HK2	+	CG5167	8	3.16993	afb_avg	9.90625	0.185931	4.15064	1	Yes	DIFF
FBtr0080438	FBgn0032480	2L	A	NTS8	HK2	+	Edem2	9	3.32193	afb_avg	6.75737	0.188593	1.44784	0	No	NONE
FBtr0333188	FBgn0039668	3R	A	NTS8	HK2	-	Trc8	147	7.20945	afb_avg	10.1183	0.191457	9.72264	0	No	NONE
FBtr0334334	FBgn0003134	3R	A	NTS8	HK2	+	Pp1alpha-96A	18	4.24793	afb_avg	10.1099	0.192426	6.90736	0	No	NONE
FBtr0089589	FBgn0086676	2R	A	NTS8	HK2	+	spin	15	4	afb_avg	11.0717	0.192722	7.35285	1	Yes	DIFF
FBtr0071687	FBgn0000326	2R	A	NTS8	HK2	-	clt	1	1	afb_avg	7.65566	0.193636	2.91958	1	Yes	SAME
FBtr0072706	FBgn0011204	3L	A	NTS8	HK2	-	cue	16	4.08746	afb_avg	10.0473	0.195134	6.54458	0	No	NONE
FBtr0077884	FBgn0031360	2L	A	NTS8	HK2	+	CG31937	13	3.80735	afb_avg	9.99988	0.199721	6.23874	0	No	NONE
FBtr0072061	FBgn0034877	2R	A	NTS8	HK2	+	levy	124	6.96578	ahg_avg	11.9371	0.0597884	8.83321	1	Yes	DIFF
FBtr0074972	FBgn0036887	3L	A	NTS8	HK2	-	CG9231	24	4.64386	ahg_avg	9.01248	0.0642964	7.96606	0	No	NONE
FBtr0087594	FBgn0020766	2R	A	NTS8	HK2	+	Aats-phe	21	4.45943	ahg_avg	8.36538	0.0696941	7.058	0	No	NONE
FBtr0087078	FBgn0010213	2R	A	NTS8	HK2	-	Sod2	176	7.46761	ahg_avg	10.2896	0.0746672	8.92959	0	No	NONE
FBtr0290271	FBgn0019960	3R	A	NTS8	HK2	-	CG6455	177	7.47573	ahg_avg	9.60447	0.0804014	9.44338	0	No	NONE
FBtr0335221	FBgn0037873	3R	A	NTS8	HK2	-	SdhC	27	4.80735	ahg_avg	11.0925	0.093599	8.04218	0	No	NONE
FBtr0075359	FBgn0004465	3L	A	NTS8	HK2	-	Su(P)	13	3.80735	ahg_avg	8.16992	0.0956828	5.83966	0	No	NONE
FBtr0079288	FBgn0031830	2L	A	NTS8	HK2	+	CoVb	32	5.04439	ahg_avg	11.8089	0.096408	8.03744	0	No	NONE
FBtr0072326	FBgn0035046	2R	A	NTS8	HK2	+	CG3683	72	6.18982	ahg_avg	10.258	0.0981621	8.73406	0	No	NONE
FBtr0083000	FBgn0038271	3R	A	NTS8	HK2	+	CG3731	843	9.7211	ahg_avg	11.4095	0.10091	9.73496	0	No	NONE
FBtr0073113	FBgn0035404	3L	A	NTS8	HK2	-	CG12079	77	6.2854	ahg_avg	10.2047	0.101303	8.27978	0	No	NONE
FBtr0077520	FBgn0021967	2L	A	NTS8	HK2	+	Pdsw	407	8.67243	ahg_avg	11.1368	0.101546	8.84265	0	No	NONE
FBtr0075220	FBgn0036726	3L	A	NTS8	HK2	+	CG7603	45	5.52356	ahg_avg	10.4523	0.105339	7.18871	0	No	NONE
FBtr0087231	FBgn0001124	2R	A	NTS8	HK2	+	Got1	274	8.10329	ahg_avg	11.3652	0.105369	10.2041	1	Yes	SAME
FBtr0086969	FBgn0023172	2R	A	NTS8	HK2	+	RhoGEF2	2	1.58496	ahg_avg	8.98581	0.105984	5.43408	0	No	NONE
FBtr0078512	FBgn0028500	3L	A	NTS8	HK2	-	Rich	10	3.45943	ahg_avg	7.86395	0.107752	6.79671	0	No	NONE
FBtr0086156	FBgn0014028	2R	A	NTS8	HK2	+	SdhB	44	5.49185	ahg_avg	10.6307	0.108036	6.32645	0	No	NONE
FBtr0078709	FBgn0037356	3R	A	NTS8	HK2	+	CG12170	18	4.24793	ahg_avg	8.04756	0.11045	6.71961	1	Yes	SAME
FBtr0080889	FBgn0000409	2L	A	NTS8	HK2	+	Cyt-c-p	104	6.71425	ahg_avg	12.0151	0.113139	8.19432	0	No	NONE
FBtr0082384	FBgn0037892	3R	A	NTS8	HK2	+	mRpL40	58	5.88264	ahg_avg	7.45135	0.114356	6.48331	0	No	NONE
FBtr0083637	FBgn0023083	3R	A	NTS8	HK2	+	fray	22	4.52356	ahg_avg	9.80181	0.121103	7.12939	0	No	NONE
FBtr0112421	FBgn0085257	2R	A	NTS8	HK2	+	CG34228	16	4.08746	ahg_avg	8.91747	0.126559	6.94002	1	Yes	DIFF
FBtr0308315	FBgn0014906	2L	A	NTS8	HK2	+	Hydr2	86	6.44294	ahg_avg	10.7444	0.126975	8.10074	0	No	NONE
FBtr0084311	FBgn0039025	3R	A	NTS8	HK2	+	Usp12-46	30	4.9542	ahg_avg	8.06648	0.128684	7.85536	0	No	NONE
FBtr0330615	FBgn0033523	2R	A	NTS8	HK2	-	CG12895	16	4.08746	ahg_avg	8.29655	0.132759	6.42086	0	No	NONE
FBtr0333400	FBgn0035228	3L	A	NTS8	HK2	-	CG12091	13	3.80735	ahg_avg	10.4173	0.135455	7.90332	0	No	NONE
FBtr0072348	FBgn0019886	2R	A	NTS8	HK2	-	Letm1	58	5.88264	ahg_avg	9.14572	0.137094	8.57214	0	No	NONE
FBtr0333052	FBgn0061515	3L	A	NTS8	HK2	-	endos	486	8.92778	ahg_avg	10.4138	0.137378	10.1697	0	No	NONE
FBtr0077065	FBgn0035674	3L	A	NTS8	HK2	-	CG13295	4	2.32193	ahg_avg	7.9689	0.148212	4.11507	0	No	NONE
FBtr0076138	FBgn0086254	3L	A	NTS8	HK2	-	CG6084	91	6.52356	ahg_avg	11.8207	0.150156	9.75225	1	Yes	SAME
FBtr0087926	FBgn0033734	2R	A	NTS8	HK2	+	CG8520	86	6.44294	ahg_avg	8.99016	0.15161	8.91677	0	No	NONE
FBtr0089497	FBgn0001098	3R	A	NTS8	HK2	-	Gdh	64	6.02237	ahg_avg	12.1373	0.153209	8.50891	0	No	NONE
FBtr0077736	FBgn0031457	2L	A	NTS8	HK2	-	CG3077	15	4	ahg_avg	7.46415	0.154775	5.84627	1	Yes	DIFF
FBtr0331984	FBgn0034182	2R	A	NTS8	HK2	+	CG9640	0	0	ahg_avg	5.61842	0.166678	1.48789	0	No	NONE
FBtr0082413	FBgn0037917	3R	A	NTS8	HK2	+	wkd	7	3	ahg_avg	9.61601	0.177257	6.02241	1	Yes	SAME
FBtr0082297	FBgn0037846	3R	A	NTS8	HK2	-	CG6574	2	1.58496	ahg_avg	7.05662	0.179671	4.58386	0	No	NONE
FBtr0087424	FBgn0033989	2R	A	NTS8	HK2	-	CG7639	24	4.64386	ahg_avg	8.53361	0.190471	7.97185	0	No	NONE
FBtr0082747	FBgn0027610	3R	A	NTS8	HK2	+	Dic1	18	4.24793	ahg_avg	11.3375	0.195338	7.26193	0	No	NONE
FBtr0083063	FBgn0016691	3R	A	NTS8	HK2	+	Oscp	258	8.01681	aht_avg	12.0189	0.0651757	8.93953	0	No	NONE
FBtr0082473	FBgn0019624	3R	A	NTS8	HK2	+	CoVa	545	9.09276	aht_avg	11.8942	0.071834	9.91197	0	No	NONE
FBtr0085631	FBgn0015222	3R	A	NTS8	HK2	-	Fer1HCH	298	8.224	aht_avg	12.736	0.08839	10.372	0	No	NONE
FBtr0333672	FBgn0010217	4	A	NTS8	HK2	+	ATPsyn-beta	43	5.45943	aht_avg	12.1662	0.0935003	8.01181	0	No	NONE
FBtr0084977	FBgn0260946	3R	A	NTS8	HK2	-	exo84	5	2.58496	aht_avg	7.64492	0.0966896	4.78866	0	No	NONE
FBtr0082082	FBgn0037728	3R	A	NTS8	HK2	+	CG16817	489	8.93664	aht_avg	11.4552	0.100757	10.3783	0	No	NONE
FBtr0085622	FBgn0015221	3R	A	NTS8	HK2	+	Fer2LCH	317	8.31288	aht_avg	12.7563	0.101155	10.1995	2	Yes	MULTI
FBtr0076229	FBgn0003462	3L	A	NTS8	HK2	-	Sod	106	6.74147	aht_avg	12.2865	0.102735	9.11358	1	Yes	DIFF
FBtr0087475	FBgn0028689	2R	A	NTS8	HK2	-	Rpn6	92	6.53916	aht_avg	11.0871	0.10282	10.4524	0	No	NONE
FBtr0076223	FBgn0036136	3L	A	NTS8	HK2	-	Ufd1-like	53	5.75489	aht_avg	9.22278	0.106323	9.21741	0	No	NONE
FBtr0072091	FBgn0034902	2R	A	NTS8	HK2	+	CG5532	13	3.80735	aht_avg	10.8238	0.111307	7.33753	0	No	NONE
FBtr0080122	FBgn0032292	2L	A	NTS8	HK2	-	CG6750	199	7.64386	aht_avg	9.28776	0.115146	8.71117	0	No	NONE
FBtr0074872	FBgn0036932	3L	A	NTS8	HK2	-	CG14184	25	4.70044	aht_avg	9.53174	0.118473	6.42567	0	No	NONE
FBtr0084206	FBgn0038947	3R	A	NTS8	HK2	+	Sar1	112	6.82018	aht_avg	11.6254	0.119928	9.21473	0	No	NONE
FBtr0088224	FBgn0029134	2R	A	NTS8	HK2	+	Prosbeta5	69	6.12928	aht_avg	11.2149	0.121138	8.10661	1	Yes	SAME
FBtr0086071	FBgn0039970	2R	A	NTS8	HK2	+	CG17508	9	3.32193	aht_avg	10.5202	0.124679	6.1449	0	No	NONE
FBtr0086669	FBgn0034335	2R	A	NTS8	HK2	+	GstE1	23	4.58496	aht_avg	9.0155	0.125323	6.55409	0	No	NONE
FBtr0081080	FBgn0032689	2L	A	NTS8	HK2	-	CG10413	14	3.90689	aht_avg	10.3291	0.126	7.76204	0	No	NONE
FBtr0075629	FBgn0023174	3L	A	NTS8	HK2	+	Prosbeta2	85	6.42626	aht_avg	11.3654	0.127838	8.43083	0	No	NONE
FBtr0078209	FBgn0037009	3L	A	NTS8	HK2	+	CG5104	9	3.32193	aht_avg	8.73006	0.129765	6.20971	0	No	NONE
FBtr0088524	FBgn0033428	2R	A	NTS8	HK2	+	Updo	56	5.83289	aht_avg	9.99846	0.130309	7.24724	0	No	NONE
FBtr0082246	FBgn0259938	3R	A	NTS8	HK2	+	cwo	4	2.32193	aht_avg	9.16017	0.130841	5.0522	0	No	NONE
FBtr0079948	FBgn0250843	2L	A	NTS8	HK2	+	Prosalpha6	87	6.45943	aht_avg	10.6671	0.136495	7.79733	0	No	NONE
FBtr0087592	FBgn0013770	2R	A	NTS8	HK2	+	Cp1	198	7.63662	aht_avg	12.8518	0.139107	10.0579	0	No	NONE
FBtr0342837	FBgn0029174	2L	A	NTS8	HK2	+	FKBP59	146	7.19967	aht_avg	9.7726	0.143266	8.5343	0	No	NONE
FBtr0084293	FBgn0038974	3R	A	NTS8	HK2	-	CG5377	1	1	aht_avg	7.12954	0.144379	2.64882	0	No	NONE
FBtr0078965	FBgn0037218	3R	A	NTS8	HK2	+	aux	22	4.52356	aht_avg	10.1281	0.14519	7.10005	0	No	NONE
FBtr0085211	FBgn0004387	3R	A	NTS8	HK2	-	Klp98A	17	4.16993	aht_avg	8.66101	0.146659	3.54625	0	No	NONE
FBtr0088008	FBgn0033698	2R	A	NTS8	HK2	-	CG8858	5	2.58496	aht_avg	7.38328	0.147139	5.56368	0	No	NONE
FBtr0084656	FBgn0039213	3R	A	NTS8	HK2	+	atl	76	6.26679	aht_avg	11.6758	0.149907	7.72222	0	No	NONE
FBtr0112544	FBgn0085370	2L	A	NTS8	HK2	-	Pde11	3	2	aht_avg	8.37472	0.150273	5.28291	0	No	NONE
FBtr0078805	FBgn0250746	3R	A	NTS8	HK2	-	Prosbeta7	140	7.13955	aht_avg	11.8724	0.152262	9.93179	0	No	NONE
FBtr0081253	FBgn0003231	2L	A	NTS8	HK2	+	ref(2)P	99	6.64386	aht_avg	11.7822	0.152794	8.80085	0	No	NONE
FBtr0084055	FBgn0038876	3R	A	NTS8	HK2	+	CG5919	13	3.80735	aht_avg	7.80496	0.156409	5.75616	0	No	NONE
FBtr0085849	FBgn0024891	3R	A	NTS8	HK2	-	ferrochelatase	61	5.9542	aht_avg	9.15573	0.156766	7.70648	0	No	NONE
FBtr0088464	FBgn0050005	2R	A	NTS8	HK2	+	GstT2	3	2	aht_avg	8.58042	0.158836	5.83981	0	No	NONE
FBtr0076884	FBgn0035763	3L	A	NTS8	HK2	-	CG8602	29	4.90689	aht_avg	11.2196	0.158898	7.62491	1	Yes	DIFF
FBtr0083595	FBgn0010877	3R	A	NTS8	HK2	-	l(3)05822	16	4.08746	aht_avg	10.2158	0.165378	5.45778	0	No	NONE
FBtr0077811	FBgn0031374	2L	A	NTS8	HK2	+	CG7337	7	3	aht_avg	8.91166	0.169583	6.56205	0	No	NONE
FBtr0077625	FBgn0031474	2L	A	NTS8	HK2	+	CG2991	4	2.32193	aht_avg	10.1338	0.169619	6.53254	0	No	NONE
FBtr0073256	FBgn0028664	3L	A	NTS8	HK2	-	VhaM9.7-c	28	4.85798	aht_avg	9.13792	0.176049	5.71293	0	No	NONE
FBtr0331832	FBgn0015793	3L	A	NTS8	HK2	+	Rab19	31	5	aht_avg	8.73801	0.179818	8.36255	0	No	NONE
FBtr0339908	FBgn0041094	3L	A	NTS8	HK2	+	scyl	6	2.80735	aht_avg	10.2721	0.180873	6.6905	0	No	NONE
FBtr0113140	FBgn0035542	3L	A	NTS8	HK2	+	DOR	28	4.85798	aht_avg	9.6552	0.183198	7.1874	0	No	NONE
FBtr0072236	FBgn0034913	2R	A	NTS8	HK2	-	usnp	52	5.72792	aht_avg	10.0427	0.187132	8.54549	0	No	NONE
FBtr0084171	FBgn0038923	3R	A	NTS8	HK2	+	mRpL35	20	4.39232	amg_avg	8.11904	0.0842145	6.51188	0	No	NONE
FBtr0072428	FBgn0041205	2R	A	NTS8	HK2	-	key	34	5.12928	amg_avg	8.8118	0.108529	7.44669	0	No	NONE
FBtr0072853	FBgn0027547	3L	A	NTS8	HK2	-	CG1927	17	4.16993	amg_avg	10.1831	0.114568	6.8821	0	No	NONE
FBtr0300775	FBgn0035529	3L	A	NTS8	HK2	+	CG1319	29	4.90689	amg_avg	8.7673	0.123967	7.67185	0	No	NONE
FBtr0088834	FBgn0033226	2R	A	NTS8	HK2	+	CG1882	148	7.21917	amg_avg	9.57376	0.12984	9.18817	0	No	NONE
FBtr0302084	FBgn0034083	2R	A	NTS8	HK2	+	lbk	8	3.16993	amg_avg	8.51151	0.146227	5.7369	0	No	NONE
FBtr0088531	FBgn0033434	2R	A	NTS8	HK2	+	CG1902	113	6.83289	amg_avg	10.6418	0.148252	9.54596	1	Yes	DIFF
FBtr0079325	FBgn0051633	2L	A	NTS8	HK2	-	CG31633	2	1.58496	amg_avg	7.44697	0.15518	6.62787	0	No	NONE
FBtr0075055	FBgn0036813	3L	A	NTS8	HK2	+	Aut1	20	4.39232	amg_avg	9.99177	0.156235	6.46308	0	No	NONE
FBtr0087523	FBgn0033905	2R	A	NTS8	HK2	+	CG18324	3	2	amg_avg	7.70026	0.157212	4.46557	1	Yes	SAME
FBtr0339562	FBgn0051673	2L	A	NTS8	HK2	+	CG31673	2	1.58496	amg_avg	9.93121	0.169687	5.54135	0	No	NONE
FBtr0085371	FBgn0039637	3R	A	NTS8	HK2	+	CG11880	25	4.70044	amg_avg	8.93228	0.176883	8.12092	0	No	NONE
FBtr0302165	FBgn0034971	2R	A	NTS8	HK2	+	CG3209	46	5.55459	amg_avg	9.78219	0.180903	7.41022	0	No	NONE
FBtr0081097	FBgn0032701	2L	A	NTS8	HK2	+	CG10341	14	3.90689	amg_avg	7.24033	0.185348	4.21395	0	No	NONE
FBtr0090015	FBgn0032456	2L	A	NTS8	HK2	+	MRP	7	3	amg_avg	10.5203	0.187138	7.4556	0	No	NONE
FBtr0078278	FBgn0037019	3L	A	NTS8	HK2	-	Pex16	4	2.32193	amg_avg	9.32429	0.196032	5.18218	0	No	NONE
FBtr0080472	FBgn0032511	2L	A	NTS8	HK2	-	CG9306	65	6.04439	asg_avg	10.9228	0.0645777	9.62485	0	No	NONE
FBtr0331227	FBgn0031660	2L	A	NTS8	HK2	+	mRpL28	54	5.78136	asg_avg	9.71484	0.0656571	8.2788	0	No	NONE
FBtr0082344	FBgn0037874	3R	A	NTS8	HK2	+	Tctp	266	8.0607	asg_avg	12.6344	0.0688264	9.86795	1	Yes	SAME
FBtr0334113	FBgn0000100	3L	A	NTS8	HK2	+	RpLP0	306	8.26209	asg_avg	13.1739	0.0700966	9.99567	0	No	NONE
FBtr0305994	FBgn0010612	2L	A	NTS8	HK2	-	l(2)06225	85	6.42626	asg_avg	11.9797	0.0706385	9.50134	0	No	NONE
FBtr0333709	FBgn0036825	3L	A	NTS8	HK2	+	RpL26	537	9.07146	asg_avg	13.1888	0.0717465	10.0472	0	No	NONE
FBtr0079946	FBgn0005593	2L	A	NTS8	HK2	+	RpL7	125	6.97728	asg_avg	13.0678	0.0753261	9.94283	0	No	NONE
FBtr0076479	FBgn0005533	3L	A	NTS8	HK2	-	RpS17	525	9.03892	asg_avg	13.4656	0.0760911	10.2771	0	No	NONE
FBtr0084868	FBgn0039300	3R	A	NTS8	HK2	-	RpS27	323	8.33985	asg_avg	13.0659	0.0768211	10.1136	1	Yes	SAME
FBtr0308238	FBgn0039681	3R	A	NTS8	HK2	-	CG7582	2	1.58496	asg_avg	12.8728	0.0770974	9.30297	0	No	NONE
FBtr0343002	FBgn0034743	2R	A	NTS8	HK2	+	RpS16	265	8.05528	asg_avg	13.1221	0.0783166	10.3264	0	No	NONE
FBtr0079546	FBgn0031980	2L	A	NTS8	HK2	-	RpL36A	153	7.26679	asg_avg	13.1058	0.0787506	9.89148	0	No	NONE
FBtr0273390	FBgn0052113	3L	A	NTS8	HK2	+	CG32113	1	1	asg_avg	6.55384	0.0788307	6.21904	0	No	NONE
FBtr0088013	FBgn0014184	2R	A	NTS8	HK2	-	Oda	170	7.41785	asg_avg	12.3342	0.0790694	9.01121	0	No	NONE
FBtr0307068	FBgn0001942	2L	A	NTS8	HK2	+	eIF-4a	433	8.76155	asg_avg	12.9126	0.0791146	10.5761	0	No	NONE
FBtr0076032	FBgn0036213	3L	A	NTS8	HK2	+	RpL10Ab	706	9.46557	asg_avg	13.1465	0.0796689	10.3192	0	No	NONE
FBtr0072405	FBgn0002607	2R	A	NTS8	HK2	-	RpL19	508	8.99152	asg_avg	13.3684	0.0797953	10.4537	0	No	NONE
FBtr0084010	FBgn0015790	3R	A	NTS8	HK2	+	Rab11	52	5.72792	asg_avg	11.2414	0.0799053	8.26286	0	No	NONE
FBtr0302047	FBgn0014037	3L	A	NTS8	HK2	-	Su(Tpl)	34	5.12928	asg_avg	9.78626	0.0816016	9.46297	0	No	NONE
FBtr0086073	FBgn0039969	2R	A	NTS8	HK2	-	Fis1	39	5.32193	asg_avg	11.3952	0.0825015	9.4377	0	No	NONE
FBtr0085248	FBgn0003279	3R	A	NTS8	HK2	+	RpL4	299	8.22882	asg_avg	13.1729	0.0826703	9.74433	1	Yes	DIFF
FBtr0334787	FBgn0003941	2L	A	NTS8	HK2	+	RpL40	594	9.21675	asg_avg	12.9249	0.0828041	9.67089	0	No	NONE
FBtr0083303	FBgn0038446	3R	A	NTS8	HK2	-	CG14903	16	4.08746	asg_avg	8.48768	0.0833822	6.9495	0	No	NONE
FBtr0332633	FBgn0064225	2L	A	NTS8	HK2	-	RpL5	137	7.10852	asg_avg	13.3554	0.0838953	10.0723	0	No	NONE
FBtr0072172	FBgn0034967	2R	A	NTS8	HK2	+	eIF-5A	395	8.62936	asg_avg	13.0943	0.084064	10.7096	0	No	NONE
FBtr0088525	FBgn0025286	2R	A	NTS8	HK2	+	RpL31	548	9.10066	asg_avg	13.3542	0.0845464	10.1413	0	No	NONE
FBtr0073095	FBgn0035422	3L	A	NTS8	HK2	-	RpL28	236	7.88874	asg_avg	13.1087	0.0848111	9.427	0	No	NONE
FBtr0072185	FBgn0023170	2R	A	NTS8	HK2	-	RpL39	439	8.78136	asg_avg	13.3829	0.0859601	10.5401	0	No	NONE
FBtr0076633	FBgn0017579	3L	A	NTS8	HK2	+	RpL14	522	9.03067	asg_avg	13.2972	0.0863221	9.97072	0	No	NONE
FBtr0075878	FBgn0260441	3L	A	NTS8	HK2	+	RpS12	408	8.67596	asg_avg	13.3683	0.0863841	10.2055	0	No	NONE
FBtr0330677	FBgn0021856	2L	A	NTS8	HK2	+	l(2)k14505	18	4.24793	asg_avg	8.58824	0.0874945	7.29735	0	No	NONE
FBtr0083969	FBgn0038834	3R	A	NTS8	HK2	+	RpS30	527	9.04439	asg_avg	13.078	0.0877731	10.0668	0	No	NONE
FBtr0307035	FBgn0015031	2L	A	NTS8	HK2	+	cype	162	7.34873	asg_avg	12.3265	0.0879081	8.97856	0	No	NONE
FBtr0072364	FBgn0035001	2R	A	NTS8	HK2	-	slik	28	4.85798	asg_avg	9.48881	0.0882176	7.47773	0	No	NONE
FBtr0340226	FBgn0015756	2L	A	NTS8	HK2	-	RpL9	295	8.20945	asg_avg	13.5093	0.0883697	10.1692	1	Yes	DIFF
FBtr0340533	FBgn0013325	2R	A	NTS8	HK2	+	RpL11	223	7.80735	asg_avg	13.4282	0.0883862	9.96792	0	No	NONE
FBtr0086273	FBgn0010411	2R	A	NTS8	HK2	+	RpS18	281	8.13955	asg_avg	13.6572	0.0892503	10.4648	0	No	NONE
FBtr0333519	FBgn0002566	2L	A	NTS8	HK2	+	lt	3	2	asg_avg	8.94655	0.0897063	6.9278	0	No	NONE
FBtr0085772	FBgn0039830	3R	A	NTS8	HK2	-	CG1746	100	6.65821	asg_avg	12.491	0.0900198	8.82513	0	No	NONE
FBtr0100231	FBgn0066084	2R	A	NTS8	HK2	-	RpL41	4029	11.9766	asg_avg	13.8497	0.0906191	11.4691	1	Yes	SAME
FBtr0085489	FBgn0039713	3R	A	NTS8	HK2	+	RpS8	288	8.17493	asg_avg	13.1769	0.0911709	9.7815	0	No	NONE
FBtr0075884	FBgn0011284	3L	A	NTS8	HK2	+	RpS4	88	6.47573	asg_avg	13.3204	0.0916698	9.80437	1	Yes	DIFF
FBtr0077906	FBgn0000579	2L	A	NTS8	HK2	-	Eno	155	7.2854	asg_avg	12.1597	0.0920221	9.90486	0	No	NONE
FBtr0071897	FBgn0010078	2R	A	NTS8	HK2	+	RpL23	494	8.95128	asg_avg	13.4706	0.0929584	10.1852	0	No	NONE
FBtr0333910	FBgn0024733	3L	A	NTS8	HK2	-	RpL10	126	6.98868	asg_avg	13.5574	0.0931846	10.6374	0	No	NONE
FBtr0078769	FBgn0037328	3R	A	NTS8	HK2	-	RpL35A	162	7.34873	asg_avg	13.2155	0.0933029	9.41336	0	No	NONE
FBtr0075217	FBgn0040793	3L	A	NTS8	HK2	+	CG7630	67	6.08746	asg_avg	12.3871	0.0937208	7.82955	0	No	NONE
FBtr0339183	FBgn0039757	3R	A	NTS8	HK2	-	RpS7	600	9.23122	asg_avg	13.4722	0.0941021	9.99503	0	No	NONE
FBtr0088007	FBgn0033699	2R	A	NTS8	HK2	-	RpS11	183	7.52356	asg_avg	13.4207	0.0952172	10.2148	0	No	NONE
FBtr0342577	FBgn0010408	3L	A	NTS8	HK2	-	RpS9	316	8.30834	asg_avg	13.2221	0.0957787	9.85501	0	No	NONE
FBtr0084107	FBgn0038871	3R	A	NTS8	HK2	-	CG3337	11	3.58496	asg_avg	7.57649	0.0957874	6.07923	0	No	NONE
FBtr0078705	FBgn0037351	3R	A	NTS8	HK2	+	RpL13A	278	8.12412	asg_avg	13.0491	0.0961644	9.69641	0	No	NONE
FBtr0273293	FBgn0015521	2L	A	NTS8	HK2	+	RpS21	248	7.96	asg_avg	13.5086	0.0961965	10.3847	1	Yes	SAME
FBtr0331238	FBgn0020618	2L	A	NTS8	HK2	-	Rack1	436	8.77149	asg_avg	13.1084	0.0962876	9.27437	1	Yes	SAME
FBtr0333328	FBgn0039858	3R	A	NTS8	HK2	-	CycG	71	6.16993	asg_avg	11.818	0.0965789	9.88152	0	No	NONE
FBtr0308296	FBgn0017545	4	A	NTS8	HK2	-	RpS3A	149	7.22882	asg_avg	13.8628	0.097045	10.7427	0	No	NONE
FBtr0331362	FBgn0039359	3R	A	NTS8	HK2	-	RpL27	479	8.90689	asg_avg	13.4357	0.0971514	8.6742	0	No	NONE
FBtr0339412	FBgn0040773	2R	A	NTS8	HK2	+	CoVIIc	104	6.71425	asg_avg	12.1868	0.0972323	7.94798	0	No	NONE
FBtr0336783	FBgn0020910	3R	A	NTS8	HK2	+	RpL3	170	7.41785	asg_avg	13.3901	0.097734	9.50215	0	No	NONE
FBtr0079988	FBgn0032217	2L	A	NTS8	HK2	+	CG4972	10	3.45943	asg_avg	9.30033	0.0981112	7.76187	0	No	NONE
FBtr0085592	FBgn0002626	3R	A	NTS8	HK2	-	RpL32	345	8.43463	asg_avg	13.5064	0.0985018	10.0081	0	No	NONE
FBtr0113192	FBgn0086605	3R	A	NTS8	HK2	-	CG9853	86	6.44294	asg_avg	9.00608	0.099358	8.80435	0	No	NONE
FBtr0077144	FBgn0035600	3L	A	NTS8	HK2	+	CG4769	24	4.64386	asg_avg	11.8307	0.0994294	6.93582	0	No	NONE
FBtr0300425	FBgn0010100	2L	A	NTS8	HK2	+	Acon	25	4.70044	asg_avg	11.704	0.0994975	7.1867	0	No	NONE
FBtr0087105	FBgn0003274	2R	A	NTS8	HK2	+	RpLP2	819	9.67948	asg_avg	13.7633	0.0995769	10.9213	0	No	NONE
FBtr0085896	FBgn0032949	2L	A	NTS8	HK2	+	Lamp1	287	8.16993	asg_avg	12.7877	0.100188	10.2675	0	No	NONE
FBtr0073042	FBgn0035416	3L	A	NTS8	HK2	+	gry	9	3.32193	asg_avg	8.04645	0.100854	5.98218	0	No	NONE
FBtr0331295	FBgn0032987	2L	A	NTS8	HK2	-	RpL21	681	9.41363	asg_avg	13.6475	0.1012	10.3123	0	No	NONE
FBtr0082369	FBgn0086472	3R	A	NTS8	HK2	-	RpS25	569	9.15482	asg_avg	14.0522	0.10209	11.1065	0	No	NONE
FBtr0086830	FBgn0016701	2R	A	NTS8	HK2	+	Rab4	18	4.24793	asg_avg	10.1667	0.102376	6.26312	0	No	NONE
FBtr0087575	FBgn0033912	2R	A	NTS8	HK2	-	RpS23	230	7.85175	asg_avg	13.7122	0.104184	10.4864	0	No	NONE
FBtr0076949	FBgn0035715	3L	A	NTS8	HK2	-	CG10103	37	5.24793	asg_avg	8.95589	0.104197	6.04441	0	No	NONE
FBtr0299924	FBgn0032997	2R	A	NTS8	HK2	+	CG17486	4	2.32193	asg_avg	9.64787	0.104243	6.71338	0	No	NONE
FBtr0081855	FBgn0040529	3R	A	NTS8	HK2	-	CG9603	203	7.67243	asg_avg	12.6806	0.104441	9.65801	0	No	NONE
FBtr0086947	FBgn0010409	2R	A	NTS8	HK2	-	RpL18A	320	8.32643	asg_avg	13.7686	0.104467	10.2464	0	No	NONE
FBtr0331932	FBgn0002593	2L	A	NTS8	HK2	+	RpLP1	514	9.00843	asg_avg	13.9492	0.10482	10.6123	0	No	NONE
FBtr0085672	FBgn0039792	3R	A	NTS8	HK2	-	CG2267	210	7.7211	asg_avg	13.7171	0.104888	10.4151	0	No	NONE
FBtr0085713	FBgn0000416	3R	A	NTS8	HK2	-	Sap-r	139	7.12928	asg_avg	12.6348	0.105331	10.044	0	No	NONE
FBtr0075309	FBgn0250814	3L	A	NTS8	HK2	+	CG4169	264	8.04985	asg_avg	10.9991	0.105359	8.69674	0	No	NONE
FBtr0072828	FBgn0035232	3L	A	NTS8	HK2	-	CG12099	45	5.52356	asg_avg	8.32196	0.10596	7.76781	0	No	NONE
FBtr0079724	FBgn0010265	2L	A	NTS8	HK2	-	RpS13	353	8.46761	asg_avg	13.4518	0.106618	10.3822	0	No	NONE
FBtr0072805	FBgn0026372	3L	A	NTS8	HK2	-	RpL23A	1470	10.5226	asg_avg	13.5735	0.106633	10.0532	0	No	NONE
FBtr0331950	FBgn0050423	2R	A	NTS8	HK2	-	CG30423	29	4.90689	asg_avg	11.3156	0.107626	8.40514	0	No	NONE
FBtr0081979	FBgn0261241	3R	A	NTS8	HK2	+	Vps16A	5	2.58496	asg_avg	8.00191	0.10764	5.95523	0	No	NONE
FBtr0072030	FBgn0250838	2R	A	NTS8	HK2	-	CG30415	158	7.31288	asg_avg	12.3777	0.108005	10.0867	1	Yes	SAME
FBtr0082131	FBgn0037744	3R	A	NTS8	HK2	+	CG8417	72	6.18982	asg_avg	10.314	0.109687	9.16715	0	No	NONE
FBtr0331927	FBgn0000556	2R	A	NTS8	HK2	+	Ef1alpha48D	468	8.87344	asg_avg	14.0964	0.110916	11.308	0	No	NONE
FBtr0071883	FBgn0011211	2R	A	NTS8	HK2	+	blw	51	5.70044	asg_avg	13.1363	0.111304	9.66276	0	No	NONE
FBtr0334842	FBgn0021906	2L	A	NTS8	HK2	-	RFeSP	69	6.12928	asg_avg	10.9325	0.112155	8.69763	0	No	NONE
FBtr0087336	FBgn0034029	2R	A	NTS8	HK2	+	eIF2B-gamma	7	3	asg_avg	7.95107	0.113051	5.20173	0	No	NONE
FBtr0087123	FBgn0034138	2R	A	NTS8	HK2	-	RpS15	1613	10.6564	asg_avg	13.7038	0.115269	10.0967	0	No	NONE
FBtr0085805	FBgn0039857	3R	A	NTS8	HK2	-	RpL6	440	8.78463	asg_avg	13.7107	0.1155	9.77912	0	No	NONE
FBtr0332966	FBgn0000559	2L	A	NTS8	HK2	-	Ef2b	337	8.40088	asg_avg	13.7685	0.11563	10.4944	0	No	NONE
FBtr0075718	FBgn0026409	3L	A	NTS8	HK2	+	Mpcp	118	6.89482	asg_avg	13.1765	0.116185	9.83035	0	No	NONE
FBtr0076405	FBgn0019644	3L	A	NTS8	HK2	+	ATPsyn-b	347	8.44294	asg_avg	12.646	0.119226	10.3137	0	No	NONE
FBtr0082962	FBgn0013981	3R	A	NTS8	HK2	+	His4r	146	7.19967	asg_avg	13.478	0.119869	10.1244	0	No	NONE
FBtr0085570	FBgn0260860	3R	A	NTS8	HK2	+	Bet5	6	2.80735	asg_avg	8.86494	0.120485	5.55775	0	No	NONE
FBtr0088251	FBgn0033550	2R	A	NTS8	HK2	-	CG12341	5	2.58496	asg_avg	7.16949	0.121171	5.26029	0	No	NONE
FBtr0077675	FBgn0031485	2L	A	NTS8	HK2	-	CG9643	14	3.90689	asg_avg	7.40642	0.121222	5.23132	0	No	NONE
FBtr0077519	FBgn0031537	2L	A	NTS8	HK2	+	sec5	8	3.16993	asg_avg	7.03568	0.121227	5.44496	1	Yes	SAME
FBtr0329864	FBgn0034245	2R	A	NTS8	HK2	-	CG14482	14	3.90689	asg_avg	12.5549	0.121431	9.30778	0	No	NONE
FBtr0088807	FBgn0033272	2R	A	NTS8	HK2	-	RagC-D	16	4.08746	asg_avg	9.19884	0.122149	6.60394	0	No	NONE
FBtr0331408	FBgn0052230	3L	A	NTS8	HK2	+	CG32230	45	5.52356	asg_avg	13.7409	0.122314	10.5789	1	Yes	SAME
FBtr0082358	FBgn0037891	3R	A	NTS8	HK2	+	CG5214	116	6.87036	asg_avg	10.7645	0.123722	9.48076	0	No	NONE
FBtr0085473	FBgn0039689	3R	A	NTS8	HK2	+	CG7598	47	5.58496	asg_avg	8.54787	0.124163	7.15776	0	No	NONE
FBtr0081512	FBgn0000370	2L	A	NTS8	HK2	+	crc	61	5.9542	asg_avg	12.819	0.124333	9.31218	0	No	NONE
FBtr0343108	FBgn0032700	2L	A	NTS8	HK2	+	CG10338	5	2.58496	asg_avg	7.8897	0.124656	6.38746	0	No	NONE
FBtr0087460	FBgn0033972	2R	A	NTS8	HK2	-	Ciao1	21	4.45943	asg_avg	9.67028	0.124733	7.14966	0	No	NONE
FBtr0077685	FBgn0051694	2L	A	NTS8	HK2	-	CG31694	159	7.32193	asg_avg	10.1158	0.125453	9.37531	0	No	NONE
FBtr0084190	FBgn0038922	3R	A	NTS8	HK2	-	CG6439	316	8.30834	asg_avg	10.1789	0.126779	9.65483	0	No	NONE
FBtr0077084	FBgn0040239	3L	A	NTS8	HK2	+	bc10	72	6.18982	asg_avg	8.5024	0.128103	6.73869	0	No	NONE
FBtr0085508	FBgn0039726	3R	A	NTS8	HK2	-	eIF2B-alpha	13	3.80735	asg_avg	8.37064	0.128942	5.33482	0	No	NONE
FBtr0071951	FBgn0034803	2R	A	NTS8	HK2	+	CG9849	22	4.52356	asg_avg	9.19242	0.129932	7.18861	1	Yes	DIFF
FBtr0071618	FBgn0050392	2R	A	NTS8	HK2	-	CG30392	88	6.47573	asg_avg	9.60256	0.129998	8.42366	0	No	NONE
FBtr0072621	FBgn0035181	3L	A	NTS8	HK2	+	CG9205	15	4	asg_avg	9.31146	0.130098	5.30293	0	No	NONE
FBtr0082092	FBgn0051352	3R	A	NTS8	HK2	-	Unc-115a	23	4.58496	asg_avg	8.57053	0.130994	8.19478	0	No	NONE
FBtr0072436	FBgn0027590	2R	A	NTS8	HK2	-	GstE12	115	6.85798	asg_avg	12.5418	0.131063	8.06565	0	No	NONE
FBtr0085174	FBgn0039507	3R	A	NTS8	HK2	-	mrt	11	3.58496	asg_avg	8.77728	0.13176	6.25872	0	No	NONE
FBtr0082883	FBgn0013998	3R	A	NTS8	HK2	-	Nsf2	28	4.85798	asg_avg	7.79173	0.132525	6.07224	0	No	NONE
FBtr0072307	FBgn0035024	2R	A	NTS8	HK2	+	CG11414	55	5.80735	asg_avg	8.78156	0.132725	8.22867	1	Yes	SAME
FBtr0071813	FBgn0013272	2R	A	NTS8	HK2	+	Gp150	45	5.52356	asg_avg	12.1435	0.133582	8.55902	0	No	NONE
FBtr0080306	FBgn0032400	2L	A	NTS8	HK2	-	CG6770	288	8.17493	asg_avg	13.546	0.133989	9.41668	0	No	NONE
FBtr0302495	FBgn0033381	2R	A	NTS8	HK2	+	GstE13	10	3.45943	asg_avg	8.98483	0.134537	4.65903	0	No	NONE
FBtr0088541	FBgn0033429	2R	A	NTS8	HK2	-	CG12929	3	2	asg_avg	7.82216	0.135029	7.1931	0	No	NONE
FBtr0082643	FBgn0260444	3R	A	NTS8	HK2	+	CG18616	22	4.52356	asg_avg	7.6196	0.135637	5.92698	0	No	NONE
FBtr0302453	FBgn0033906	2R	A	NTS8	HK2	+	CG8331	11	3.58496	asg_avg	12.5669	0.13573	9.14576	0	No	NONE
FBtr0082114	FBgn0024833	3R	A	NTS8	HK2	-	AP-1mu	21	4.45943	asg_avg	9.15146	0.135937	6.75212	0	No	NONE
FBtr0076557	FBgn0086706	3L	A	NTS8	HK2	-	pix	61	5.9542	asg_avg	11.6159	0.136673	8.44995	0	No	NONE
FBtr0086180	FBgn0029506	2R	A	NTS8	HK2	+	Tsp42Ee	53	5.75489	asg_avg	11.2868	0.137014	8.56273	0	No	NONE
FBtr0310045	FBgn0021872	2R	A	NTS8	HK2	+	Xbp1	231	7.85798	asg_avg	11.5239	0.138152	7.37427	0	No	NONE
FBtr0330718	FBgn0250906	2L	A	NTS8	HK2	-	Pgk	24	4.64386	asg_avg	11.3832	0.138415	6.60721	0	No	NONE
FBtr0084104	FBgn0016700	3R	A	NTS8	HK2	-	Rab1	56	5.83289	asg_avg	11.299	0.138692	6.96372	0	No	NONE
FBtr0072738	FBgn0041342	3L	A	NTS8	HK2	+	Cct1	29	4.90689	asg_avg	9.81591	0.139009	7.7007	0	No	NONE
FBtr0334686	FBgn0002868	3R	A	NTS8	HK2	-	MtnA	3621	11.8226	asg_avg	13.2927	0.140694	11.9721	0	No	NONE
FBtr0084743	FBgn0039223	3R	A	NTS8	HK2	-	CG5805	4	2.32193	asg_avg	7.62438	0.141359	4.16097	0	No	NONE
FBtr0079010	FBgn0014857	2L	A	NTS8	HK2	+	His3.3A	86	6.44294	asg_avg	10.8952	0.141684	8.84378	0	No	NONE
FBtr0086902	FBgn0034248	2R	A	NTS8	HK2	-	CG14483	90	6.50779	asg_avg	10.2806	0.142135	8.36275	0	No	NONE
FBtr0088903	FBgn0001091	2R	A	NTS8	HK2	-	Gapdh1	55	5.80735	asg_avg	12.7403	0.142879	7.56229	0	No	NONE
FBtr0076711	FBgn0035871	3L	A	NTS8	HK2	-	BI-1	598	9.22641	asg_avg	12.052	0.142885	10.8269	0	No	NONE
FBtr0078198	FBgn0036998	3L	A	NTS8	HK2	+	CG5969	156	7.29462	asg_avg	9.72035	0.143206	8.12489	0	No	NONE
FBtr0088679	FBgn0003074	2R	A	NTS8	HK2	-	Pgi	281	8.13955	asg_avg	12.0286	0.146465	9.54327	1	Yes	DIFF
FBtr0083307	FBgn0038438	3R	A	NTS8	HK2	-	Der-2	23	4.58496	asg_avg	9.68718	0.148099	8.21827	0	No	NONE
FBtr0088182	FBgn0033605	2R	A	NTS8	HK2	-	CG9067	6	2.80735	asg_avg	8.60059	0.148863	6.00313	0	No	NONE
FBtr0335143	FBgn0027779	2L	A	NTS8	HK2	-	VhaSFD	50	5.67243	asg_avg	12.3302	0.149399	9.19583	0	No	NONE
FBtr0088718	FBgn0040777	2R	A	NTS8	HK2	-	CG14767	22	4.52356	asg_avg	11.9449	0.149419	7.95956	0	No	NONE
FBtr0080308	FBgn0032398	2L	A	NTS8	HK2	-	CG6766	32	5.04439	asg_avg	10.3908	0.151319	7.90962	0	No	NONE
FBtr0076834	FBgn0261111	3L	A	NTS8	HK2	+	BHD	11	3.58496	asg_avg	7.11749	0.151512	5.43011	0	No	NONE
FBtr0333214	FBgn0010352	3L	A	NTS8	HK2	+	Nc73EF	29	4.90689	asg_avg	11.9473	0.153127	7.24954	0	No	NONE
FBtr0300523	FBgn0259176	2L	A	NTS8	HK2	-	bun	15	4	asg_avg	9.56618	0.153483	6.59829	1	Yes	DIFF
FBtr0072754	FBgn0035244	3L	A	NTS8	HK2	+	ABCB7	38	5.2854	asg_avg	8.13742	0.153699	6.30728	0	No	NONE
FBtr0082980	FBgn0004629	3R	A	NTS8	HK2	-	Cys	229	7.84549	asg_avg	12.8335	0.154702	8.72706	0	No	NONE
FBtr0084762	FBgn0039266	3R	A	NTS8	HK2	+	CG11791	14	3.90689	asg_avg	10.7227	0.155181	7.65601	0	No	NONE
FBtr0078448	FBgn0046301	3L	A	NTS8	HK2	-	CG7148	35	5.16993	asg_avg	7.53527	0.155733	6.73734	0	No	NONE
FBtr0071834	FBgn0034735	2R	A	NTS8	HK2	+	CG4610	9	3.32193	asg_avg	6.77384	0.155934	5.25478	0	No	NONE
FBtr0300519	FBgn0259174	3L	A	NTS8	HK2	+	Nedd4	18	4.24793	asg_avg	8.09391	0.156602	3.56035	0	No	NONE
FBtr0077169	FBgn0010747	3L	A	NTS8	HK2	+	Srp54k	50	5.67243	asg_avg	9.96747	0.158701	8.3101	2	Yes	MULTI
FBtr0089321	FBgn0036290	3L	A	NTS8	HK2	-	CG10638	7	3	asg_avg	9.85272	0.158807	7.3431	0	No	NONE
FBtr0084213	FBgn0003178	3R	A	NTS8	HK2	+	PyK	73	6.20945	asg_avg	12.5633	0.15946	8.00153	0	No	NONE
FBtr0085413	FBgn0039639	3R	A	NTS8	HK2	-	CG14512	7	3	asg_avg	6.61036	0.161747	3.64954	0	No	NONE
FBtr0073180	FBgn0035470	3L	A	NTS8	HK2	-	CG14980	7	3	asg_avg	7.14109	0.162015	6.20591	0	No	NONE
FBtr0333826	FBgn0037526	3R	A	NTS8	HK2	+	CG10092	1	1	asg_avg	6.7366	0.163083	3.92241	0	No	NONE
FBtr0075417	FBgn0036623	3L	A	NTS8	HK2	-	CG4729	10	3.45943	asg_avg	11.0818	0.164934	7.35638	0	No	NONE
FBtr0073106	FBgn0047135	3L	A	NTS8	HK2	-	CG32276	45	5.52356	asg_avg	13.3511	0.165815	9.16971	0	No	NONE
FBtr0089761	FBgn0050159	2R	A	NTS8	HK2	+	CG30159	9	3.32193	asg_avg	10.136	0.166285	7.3143	0	No	NONE
FBtr0078700	FBgn0015324	3R	A	NTS8	HK2	+	Vha26	109	6.78136	asg_avg	13.4642	0.167536	9.59976	0	No	NONE
FBtr0081953	FBgn0037609	3R	A	NTS8	HK2	-	CG9773	4	2.32193	asg_avg	8.41032	0.168846	6.32877	0	No	NONE
FBtr0080119	FBgn0032296	2L	A	NTS8	HK2	-	CG6729	17	4.16993	asg_avg	6.275	0.169398	4.65593	0	No	NONE
FBtr0082130	FBgn0037743	3R	A	NTS8	HK2	+	CG8412	3	2	asg_avg	8.62811	0.169536	5.21767	0	No	NONE
FBtr0083804	FBgn0026753	3R	A	NTS8	HK2	-	Vha13	303	8.24793	asg_avg	13.4408	0.172009	9.79588	0	No	NONE
FBtr0079194	FBgn0028420	2L	A	NTS8	HK2	+	Kr-h1	2	1.58496	asg_avg	8.67487	0.172046	4.3413	0	No	NONE
FBtr0075231	FBgn0086475	3L	A	NTS8	HK2	-	sec3	7	3	asg_avg	7.50509	0.172884	4.35077	0	No	NONE
FBtr0081279	FBgn0032799	2L	A	NTS8	HK2	-	CG10166	20	4.39232	asg_avg	9.84187	0.174292	7.03076	0	No	NONE
FBtr0086906	FBgn0034243	2R	A	NTS8	HK2	-	Ns2	18	4.24793	asg_avg	5.55939	0.174494	5.39096	0	No	NONE
FBtr0079287	FBgn0051637	2L	A	NTS8	HK2	+	CG31637	4	2.32193	asg_avg	9.0095	0.1747	4.64133	0	No	NONE
FBtr0113153	FBgn0035879	3L	A	NTS8	HK2	+	GAPcenA	12	3.70044	asg_avg	8.36399	0.175612	6.73198	0	No	NONE
FBtr0080831	FBgn0011708	2L	A	NTS8	HK2	+	Syx5	26	4.75489	asg_avg	10.8841	0.17567	8.27576	0	No	NONE
FBtr0089192	FBgn0013749	4	A	NTS8	HK2	+	Arf102F	131	7.04439	asg_avg	12.4022	0.176329	9.51452	0	No	NONE
FBtr0273240	FBgn0036318	3L	A	NTS8	HK2	+	Wbp2	44	5.49185	asg_avg	11.5663	0.176523	7.65371	0	No	NONE
FBtr0333454	FBgn0028663	3L	A	NTS8	HK2	+	VhaM9.7-b	46	5.55459	asg_avg	12.7336	0.176682	8.85358	0	No	NONE
FBtr0085293	FBgn0039588	3R	A	NTS8	HK2	-	CG12413	1	1	asg_avg	6.39009	0.177518	4.2567	0	No	NONE
FBtr0309866	FBgn0015614	2R	A	NTS8	HK2	+	CanB2	14	3.90689	asg_avg	11.2859	0.178474	7.69164	0	No	NONE
FBtr0076343	FBgn0025866	3L	A	NTS8	HK2	+	CalpB	5	2.58496	asg_avg	9.77015	0.178625	7.45773	0	No	NONE
FBtr0082670	FBgn0005671	3R	A	NTS8	HK2	-	Vha55	132	7.05528	asg_avg	12.6131	0.179124	7.82877	0	No	NONE
FBtr0083005	FBgn0028662	3R	A	NTS8	HK2	-	VhaPPA1-1	108	6.76818	asg_avg	13.013	0.181721	8.94449	0	No	NONE
FBtr0083991	FBgn0027493	3R	A	NTS8	HK2	-	CG17273	39	5.32193	asg_avg	11.8481	0.182633	7.27676	0	No	NONE
FBtr0076165	FBgn0064766	3L	A	NTS8	HK2	+	CG7600	33	5.08746	asg_avg	9.5755	0.184109	7.15059	0	No	NONE
FBtr0081978	FBgn0037671	3R	A	NTS8	HK2	+	VhaM8.9	73	6.20945	asg_avg	12.8545	0.184561	9.19277	1	Yes	DIFF
FBtr0079384	FBgn0015776	2L	A	NTS8	HK2	-	nrv1	14	3.90689	asg_avg	11.7957	0.184584	6.52232	0	No	NONE
FBtr0077912	FBgn0031356	2L	A	NTS8	HK2	-	CG17660	34	5.12928	asg_avg	10.1992	0.184637	7.70823	0	No	NONE
FBtr0088850	FBgn0026722	2R	A	NTS8	HK2	+	drosha	2	1.58496	asg_avg	7.36441	0.184776	3.41821	0	No	NONE
FBtr0081763	FBgn0014930	3R	A	NTS8	HK2	-	CG2846	6	2.80735	asg_avg	9.99058	0.186192	5.61106	0	No	NONE
FBtr0081792	FBgn0243512	3R	A	NTS8	HK2	+	puc	5	2.58496	asg_avg	9.64046	0.187225	4.44215	0	No	NONE
FBtr0071541	FBgn0034583	2R	A	NTS8	HK2	-	CG10527	17	4.16993	asg_avg	12.2845	0.188037	7.99281	0	No	NONE
FBtr0114586	FBgn0000562	2R	A	NTS8	HK2	-	egl	3	2	asg_avg	9.35041	0.188756	4.88684	0	No	NONE
FBtr0301101	FBgn0260659	3R	A	NTS8	HK2	+	CG42542	4	2.32193	asg_avg	10.804	0.191019	5.74691	0	No	NONE
FBtr0077961	FBgn0031312	2L	A	NTS8	HK2	+	Tango14	12	3.70044	asg_avg	8.51909	0.194103	4.64542	0	No	NONE
FBtr0073030	FBgn0052280	3L	A	NTS8	HK2	+	CG32280	5	2.58496	asg_avg	11.9003	0.194395	7.34827	0	No	NONE
FBtr0081843	FBgn0261108	3R	A	NTS8	HK2	+	Atg13	14	3.90689	asg_avg	9.64265	0.196896	6.27714	0	No	NONE
FBtr0072303	FBgn0035020	2R	A	NTS8	HK2	+	CG13585	195	7.61471	asg_avg	12.4238	0.198611	9.20842	0	No	NONE
FBtr0077717	FBgn0028398	2L	A	NTS8	HK2	+	Taf10	17	4.16993	asg_avg	9.80707	0.198896	5.2488	1	Yes	DIFF
FBtr0086086	FBgn0261403	2R	A	NTS8	HK2	+	sxc	2	1.58496	atg_avg	9.65606	0.0798846	6.07785	0	No	NONE
FBtr0081177	FBgn0002021	2L	A	NTS8	HK2	-	l(2)37Bb	38	5.2854	atg_avg	7.66464	0.0820454	7.14982	0	No	NONE
FBtr0082121	FBgn0014023	3R	A	NTS8	HK2	-	mRpL47	25	4.70044	atg_avg	9.21132	0.0842254	7.19236	0	No	NONE
FBtr0079723	FBgn0032031	2L	A	NTS8	HK2	-	CG13390	3	2	atg_avg	6.07277	0.0858411	4.72387	0	No	NONE
FBtr0075561	FBgn0036510	3L	A	NTS8	HK2	+	CG7427	38	5.2854	atg_avg	8.16611	0.0859601	7.51333	0	No	NONE
FBtr0082703	FBgn0002354	3R	A	NTS8	HK2	+	l(3)87Df	20	4.39232	atg_avg	8.29816	0.0862339	7.62924	0	No	NONE
FBtr0083191	FBgn0017567	3R	A	NTS8	HK2	-	ND23	100	6.65821	atg_avg	11.2386	0.087159	9.37522	0	No	NONE
FBtr0083358	FBgn0022344	3R	A	NTS8	HK2	-	CG10340	55	5.80735	atg_avg	9.61386	0.0936576	8.53877	0	No	NONE
FBtr0334696	FBgn0011476	3R	A	NTS8	HK2	-	l(3)neo43	46	5.55459	atg_avg	6.73677	0.0937982	6.68856	0	No	NONE
FBtr0085703	FBgn0039802	3R	A	NTS8	HK2	+	dj-1beta	18	4.24793	atg_avg	7.80948	0.0944479	6.18311	0	No	NONE
FBtr0078201	FBgn0037001	3L	A	NTS8	HK2	+	CG6020	199	7.64386	atg_avg	10.71	0.0957918	8.79781	1	Yes	SAME
FBtr0076822	FBgn0035805	3L	A	NTS8	HK2	-	CG7506	21	4.45943	atg_avg	7.87019	0.100132	6.11633	0	No	NONE
FBtr0075951	FBgn0010235	3L	A	NTS8	HK2	-	Klc	27	4.80735	atg_avg	9.54404	0.100456	7.45655	0	No	NONE
FBtr0078215	FBgn0037008	3L	A	NTS8	HK2	-	mTerf3	4	2.32193	atg_avg	6.6949	0.101153	4.51053	0	No	NONE
FBtr0072789	FBgn0250789	3L	A	NTS8	HK2	-	alpha-Spec	20	4.39232	atg_avg	10.471	0.103859	7.53565	0	No	NONE
FBtr0079058	FBgn0031651	2L	A	NTS8	HK2	-	mRpL24	48	5.61471	atg_avg	8.53851	0.104485	7.82924	0	No	NONE
FBtr0273273	FBgn0001247	3L	A	NTS8	HK2	-	Ide	16	4.08746	atg_avg	9.66401	0.10588	8.05121	0	No	NONE
FBtr0079960	FBgn0032191	2L	A	NTS8	HK2	-	CG5734	12	3.70044	atg_avg	9.359	0.106818	6.24427	0	No	NONE
FBtr0079696	FBgn0032053	2L	A	NTS8	HK2	-	mRpL51	79	6.32193	atg_avg	8.4461	0.107118	8.29022	0	No	NONE
FBtr0087297	FBgn0015247	2R	A	NTS8	HK2	-	Iap2	31	5	atg_avg	9.52795	0.107248	9.07458	1	Yes	SAME
FBtr0089153	FBgn0039889	4	A	NTS8	HK2	-	CG2219	14	3.90689	atg_avg	9.67504	0.107928	7.93824	0	No	NONE
FBtr0076211	FBgn0036135	3L	A	NTS8	HK2	+	mRpL2	17	4.16993	atg_avg	8.04433	0.108603	6.48863	0	No	NONE
FBtr0073288	FBgn0035534	3L	A	NTS8	HK2	+	mRpS6	37	5.24793	atg_avg	7.89907	0.109372	7.30863	0	No	NONE
FBtr0085720	FBgn0011739	3R	A	NTS8	HK2	-	wts	3	2	atg_avg	8.41482	0.109772	5.09913	0	No	NONE
FBtr0077435	FBgn0031601	2L	A	NTS8	HK2	+	Dim1	20	4.39232	atg_avg	8.12421	0.111648	7.32963	0	No	NONE
FBtr0080843	FBgn0001995	2L	A	NTS8	HK2	-	mRpL4	17	4.16993	atg_avg	9.04094	0.114511	6.61992	0	No	NONE
FBtr0086057	FBgn0033038	2R	A	NTS8	HK2	-	CG7791	8	3.16993	atg_avg	8.04849	0.117693	5.72299	0	No	NONE
FBtr0335135	FBgn0053002	2L	A	NTS8	HK2	-	mRpL27	11	3.58496	atg_avg	8.35634	0.118798	6.0989	0	No	NONE
FBtr0079992	FBgn0032222	2L	A	NTS8	HK2	+	CG5037	26	4.75489	atg_avg	9.22721	0.12094	7.76106	0	No	NONE
FBtr0303475	FBgn0011769	3L	A	NTS8	HK2	-	Fdxh	13	3.80735	atg_avg	7.61422	0.121311	6.81095	0	No	NONE
FBtr0336788	FBgn0027655	3R	A	NTS8	HK2	+	htt	1	1	atg_avg	7.8406	0.123121	5.16684	0	No	NONE
FBtr0084663	FBgn0051126	3R	A	NTS8	HK2	+	CG31126	60	5.93074	atg_avg	8.17726	0.124811	7.9147	0	No	NONE
FBtr0080086	FBgn0032200	2L	A	NTS8	HK2	-	CG5676	38	5.2854	atg_avg	9.94468	0.127001	8.06621	0	No	NONE
FBtr0336813	FBgn0038107	3R	A	NTS8	HK2	-	CG17327	23	4.58496	atg_avg	8.10296	0.12866	6.6747	0	No	NONE
FBtr0330625	FBgn0033891	2R	A	NTS8	HK2	+	CG8067	8	3.16993	atg_avg	6.76792	0.130339	6.69182	0	No	NONE
FBtr0084679	FBgn0039205	3R	A	NTS8	HK2	-	CG13623	16	4.08746	atg_avg	9.05431	0.132574	8.66999	0	No	NONE
FBtr0078493	FBgn0004179	3L	A	NTS8	HK2	+	Csp	24	4.64386	atg_avg	10.4362	0.132906	6.67688	0	No	NONE
FBtr0111146	FBgn0044510	3L	A	NTS8	HK2	+	mRpS5	10	3.45943	atg_avg	10.6464	0.133888	7.7679	0	No	NONE
FBtr0087400	FBgn0034001	2R	A	NTS8	HK2	-	mRpL41	6	2.80735	atg_avg	8.57262	0.134303	6.36399	0	No	NONE
FBtr0087729	FBgn0086532	2R	A	NTS8	HK2	+	Spt-I	15	4	atg_avg	8.61725	0.134615	5.35433	0	No	NONE
FBtr0079417	FBgn0031896	2L	A	NTS8	HK2	-	CG4502	242	7.92481	atg_avg	9.50339	0.13669	9.36897	0	No	NONE
FBtr0082530	FBgn0025802	3R	A	NTS8	HK2	-	Sbf	5	2.58496	atg_avg	8.60087	0.138523	7.43769	0	No	NONE
FBtr0089318	FBgn0032720	2L	A	NTS8	HK2	-	mRpL13	12	3.70044	atg_avg	8.83129	0.139635	6.07424	0	No	NONE
FBtr0077589	FBgn0016698	2L	A	NTS8	HK2	+	Ptpa	17	4.16993	atg_avg	7.75351	0.140793	6.48719	0	No	NONE
FBtr0087738	FBgn0033808	2R	A	NTS8	HK2	+	CG4627	21	4.45943	atg_avg	7.00173	0.141576	6.67724	0	No	NONE
FBtr0335286	FBgn0033055	2R	A	NTS8	HK2	+	tbce	24	4.64386	atg_avg	8.20098	0.142031	7.84821	0	No	NONE
FBtr0086781	FBgn0062440	2R	A	NTS8	HK2	-	CG17680	4	2.32193	atg_avg	10.0387	0.144873	5.39007	0	No	NONE
FBtr0273323	FBgn0039187	3R	A	NTS8	HK2	+	CG6454	3	2	atg_avg	9.20514	0.145993	5.56348	0	No	NONE
FBtr0085375	FBgn0028671	3R	A	NTS8	HK2	+	Vha100-1	12	3.70044	atg_avg	10.0403	0.146254	7.28676	0	No	NONE
FBtr0075898	FBgn0036333	3L	A	NTS8	HK2	-	MICAL-like	28	4.85798	atg_avg	8.7399	0.148062	6.86459	0	No	NONE
FBtr0081132	FBgn0032724	2L	A	NTS8	HK2	+	CG10428	10	3.45943	atg_avg	7.82631	0.148512	6.28398	0	No	NONE
FBtr0089451	FBgn0052000	4	A	NTS8	HK2	+	CG32000	1	1	atg_avg	10.4273	0.148888	6.31115	0	No	NONE
FBtr0290279	FBgn0033356	2R	A	NTS8	HK2	-	CG8229	25	4.70044	atg_avg	11.3062	0.151036	8.97487	1	Yes	SAME
FBtr0086462	FBgn0026378	2R	A	NTS8	HK2	+	Rep	1	1	atg_avg	7.14582	0.151112	0	0	No	NONE
FBtr0085796	FBgn0039854	3R	A	NTS8	HK2	+	CG1635	3	2	atg_avg	8.62683	0.151277	4.64773	0	No	NONE
FBtr0083316	FBgn0038426	3R	A	NTS8	HK2	-	mRpS33	45	5.52356	atg_avg	8.81238	0.15171	8.05038	0	No	NONE
FBtr0301479	FBgn0027948	3R	A	NTS8	HK2	+	msps	22	4.52356	atg_avg	9.98045	0.154627	7.45381	0	No	NONE
FBtr0088611	FBgn0033391	2R	A	NTS8	HK2	-	CG8026	17	4.16993	atg_avg	8.67445	0.156533	6.48683	0	No	NONE
FBtr0089758	FBgn0050011	2R	A	NTS8	HK2	+	gem	6	2.80735	atg_avg	10.7858	0.15916	6.13179	1	Yes	SAME
FBtr0085625	FBgn0039765	3R	A	NTS8	HK2	+	mRpS18C	92	6.53916	atg_avg	7.93012	0.159378	7.18369	0	No	NONE
FBtr0086714	FBgn0034361	2R	A	NTS8	HK2	-	mRpS28	5	2.58496	atg_avg	9.05773	0.159526	6.19744	0	No	NONE
FBtr0087844	FBgn0033762	2R	A	NTS8	HK2	+	CG8632	8	3.16993	atg_avg	8.98163	0.160067	6.90514	0	No	NONE
FBtr0085266	FBgn0039561	3R	A	NTS8	HK2	-	mfrn	110	6.79442	atg_avg	9.12582	0.160829	4.75948	0	No	NONE
FBtr0072208	FBgn0034938	2R	A	NTS8	HK2	-	CG3803	11	3.58496	atg_avg	7.96629	0.161476	6.3803	0	No	NONE
FBtr0087353	FBgn0034032	2R	A	NTS8	HK2	-	CG8195	3	2	atg_avg	8.92797	0.163138	6.67629	0	No	NONE
FBtr0086647	FBgn0034380	2R	A	NTS8	HK2	-	CG15087	18	4.24793	atg_avg	7.64501	0.163431	7.03077	0	No	NONE
FBtr0072281	FBgn0041582	2R	A	NTS8	HK2	-	tamo	16	4.08746	atg_avg	8.56771	0.166517	4.96088	0	No	NONE
FBtr0340325	FBgn0015772	2L	A	NTS8	HK2	-	Nak	3	2	atg_avg	8.27295	0.16721	5.64709	0	No	NONE
FBtr0305560	FBgn0028507	2L	A	NTS8	HK2	+	CG3793	10	3.45943	atg_avg	8.84705	0.167903	5.80995	0	No	NONE
FBtr0081930	FBgn0037637	3R	A	NTS8	HK2	-	CG9836	123	6.9542	atg_avg	11.4669	0.168566	8.64351	2	Yes	MULTI
FBtr0072668	FBgn0035205	3L	A	NTS8	HK2	+	CG2469	13	3.80735	atg_avg	10.0529	0.170387	7.93113	0	No	NONE
FBtr0077165	FBgn0035591	3L	A	NTS8	HK2	+	CG4611	7	3	atg_avg	6.55979	0.173856	6.17175	0	No	NONE
FBtr0077631	FBgn0028970	2L	A	NTS8	HK2	+	betaggt-II	12	3.70044	atg_avg	8.84278	0.177478	5.84803	0	No	NONE
FBtr0114509	FBgn0035488	3L	A	NTS8	HK2	-	CG11593	8	3.16993	atg_avg	9.43299	0.177782	6.6086	0	No	NONE
FBtr0334320	FBgn0024326	3R	A	NTS8	HK2	-	Mkk4	2	1.58496	atg_avg	9.8048	0.178979	4.56507	0	No	NONE
FBtr0332423	FBgn0003748	2R	A	NTS8	HK2	+	Treh	57	5.85798	atg_avg	10.7409	0.181553	9.06128	0	No	NONE
FBtr0088103	FBgn0037084	2R	A	NTS8	HK2	+	Syx6	78	6.30378	atg_avg	9.54838	0.181824	7.17912	0	No	NONE
FBtr0086000	FBgn0021847	2R	A	NTS8	HK2	-	l(2)k14710	8	3.16993	atg_avg	8.91855	0.181835	6.65313	0	No	NONE
FBtr0086118	FBgn0033088	2R	A	NTS8	HK2	+	CG3271	8	3.16993	atg_avg	8.0481	0.182238	6.32376	0	No	NONE
FBtr0078665	FBgn0029088	3R	A	NTS8	HK2	-	disp	2	1.58496	atg_avg	7.68683	0.185309	4.47517	0	No	NONE
FBtr0080087	FBgn0000229	2L	A	NTS8	HK2	-	bsk	5	2.58496	atg_avg	10.9525	0.185361	7.97204	0	No	NONE
FBtr0087862	FBgn0026619	2R	A	NTS8	HK2	-	Taz	48	5.61471	atg_avg	8.79258	0.186454	8.78017	0	No	NONE
FBtr0078038	FBgn0031286	2L	A	NTS8	HK2	-	CG3862	4	2.32193	atg_avg	6.72359	0.18671	4.14333	0	No	NONE
FBtr0333097	FBgn0032223	2L	A	NTS8	HK2	+	GATAd	5	2.58496	atg_avg	7.9946	0.188869	7.02273	0	No	NONE
FBtr0072900	FBgn0035335	3L	A	NTS8	HK2	-	mRpL23	9	3.32193	atg_avg	8.63252	0.190103	5.74302	0	No	NONE
FBtr0083287	FBgn0038425	3R	A	NTS8	HK2	+	CG14881	2	1.58496	atg_avg	7.11582	0.194741	4.59423	0	No	NONE
FBtr0078445	FBgn0037138	3L	A	NTS8	HK2	-	P5CDh1	29	4.90689	atg_avg	10.7603	0.195944	7.70029	0	No	NONE
FBtr0079128	FBgn0031713	2L	A	NTS8	HK2	-	CG7277	66	6.06609	ejd_avg	8.17522	0.0691385	7.65511	0	No	NONE
FBtr0335459	FBgn0044511	3R	A	NTS8	HK2	-	mRpS21	30	4.9542	ejd_avg	9.53289	0.0810255	8.38948	0	No	NONE
FBtr0333250	FBgn0031544	2L	A	NTS8	HK2	+	CG17593	73	6.20945	ejd_avg	9.04818	0.0895191	7.54976	0	No	NONE
FBtr0084466	FBgn0039112	3R	A	NTS8	HK2	-	CG10219	114	6.84549	ejd_avg	10.7297	0.0902041	9.58169	1	Yes	DIFF
FBtr0306540	FBgn0031213	2L	A	NTS8	HK2	+	galectin	2	1.58496	ejd_avg	9.93882	0.0904488	6.51225	0	No	NONE
FBtr0339306	FBgn0033357	2R	A	NTS8	HK2	+	Tom7	75	6.24793	ejd_avg	11.2597	0.0907589	9.96531	0	No	NONE
FBtr0080937	FBgn0032595	2L	A	NTS8	HK2	-	CG17996	80	6.33985	ejd_avg	8.14667	0.0947857	6.9358	0	No	NONE
FBtr0072395	FBgn0035088	2R	A	NTS8	HK2	+	CG3776	57	5.85798	ejd_avg	9.50658	0.097711	8.11529	0	No	NONE
FBtr0081146	FBgn0032746	2L	A	NTS8	HK2	+	CG10470	140	7.13955	ejd_avg	9.76331	0.0994878	8.97036	0	No	NONE
FBtr0082590	FBgn0086134	3R	A	NTS8	HK2	+	Prosalpha2	292	8.19476	ejd_avg	10.9709	0.101852	9.75413	0	No	NONE
FBtr0086540	FBgn0023211	2R	A	NTS8	HK2	-	Elongin-C	49	5.64386	ejd_avg	11.3732	0.106618	9.1826	0	No	NONE
FBtr0335142	FBgn0032596	2L	A	NTS8	HK2	-	Prosbeta4	53	5.75489	ejd_avg	11.2158	0.109481	8.34896	0	No	NONE
FBtr0336763	FBgn0037340	3R	A	NTS8	HK2	-	CG14671	4	2.32193	ejd_avg	8.55268	0.110323	5.12394	0	No	NONE
FBtr0084797	FBgn0039259	3R	A	NTS8	HK2	-	CG11781	24	4.64386	ejd_avg	8.53831	0.111833	7.323	0	No	NONE
FBtr0084453	FBgn0039111	3R	A	NTS8	HK2	+	Plip	13	3.80735	ejd_avg	8.36789	0.111959	7.45177	1	Yes	DIFF
FBtr0078012	FBgn0031285	2L	A	NTS8	HK2	+	CG3662	83	6.39232	ejd_avg	12.1883	0.114565	10.2983	1	Yes	SAME
FBtr0085405	FBgn0062442	3R	A	NTS8	HK2	-	CG1458	80	6.33985	ejd_avg	10.8129	0.116911	8.41171	0	No	NONE
FBtr0087826	FBgn0033755	2R	A	NTS8	HK2	+	ClC-b	4	2.32193	ejd_avg	8.74245	0.117212	5.77029	0	No	NONE
FBtr0076667	FBgn0001248	3L	A	NTS8	HK2	-	Idh	198	7.63662	ejd_avg	12.2114	0.118459	9.92605	0	No	NONE
FBtr0300803	FBgn0038809	3R	A	NTS8	HK2	-	CG16953	49	5.64386	ejd_avg	10.6522	0.119024	7.37815	0	No	NONE
FBtr0084688	FBgn0039218	3R	A	NTS8	HK2	+	Rpb10	13	3.80735	ejd_avg	9.25148	0.119867	7.1966	1	Yes	DIFF
FBtr0088403	FBgn0033480	2R	A	NTS8	HK2	+	mRpL42	35	5.16993	ejd_avg	7.9114	0.12001	6.50861	0	No	NONE
FBtr0071907	FBgn0034791	2R	A	NTS8	HK2	-	CG3501	105	6.72792	ejd_avg	9.43682	0.120738	9.1577	0	No	NONE
FBtr0079931	FBgn0011584	2L	A	NTS8	HK2	+	Trp1	165	7.37504	ejd_avg	10.5094	0.121738	5.76216	0	No	NONE
FBtr0082600	FBgn0038035	3R	A	NTS8	HK2	-	lig3	2	1.58496	ejd_avg	7.38869	0.122265	4.64827	0	No	NONE
FBtr0077181	FBgn0035592	3L	A	NTS8	HK2	-	CG10674	16	4.08746	ejd_avg	9.61157	0.12278	7.24318	0	No	NONE
FBtr0112422	FBgn0259832	2R	A	NTS8	HK2	+	CG34229	10	3.45943	ejd_avg	7.68387	0.124041	6.05273	0	No	NONE
FBtr0083116	FBgn0038323	3R	A	NTS8	HK2	-	CG6196	6	2.80735	ejd_avg	7.29391	0.126963	5.16005	0	No	NONE
FBtr0084135	FBgn0260940	3R	A	NTS8	HK2	+	lsn	10	3.45943	ejd_avg	7.80022	0.127162	5.55946	0	No	NONE
FBtr0339713	FBgn0037530	3R	A	NTS8	HK2	-	CG2943	54	5.78136	ejd_avg	9.69933	0.128398	9.08179	1	Yes	SAME
FBtr0081128	FBgn0032702	2L	A	NTS8	HK2	-	CG10376	6	2.80735	ejd_avg	8.41908	0.132402	5.05531	0	No	NONE
FBtr0085154	FBgn0011289	3R	A	NTS8	HK2	+	TfIIA-L	60	5.93074	ejd_avg	10.2966	0.132632	8.29615	0	No	NONE
FBtr0084032	FBgn0023423	3R	A	NTS8	HK2	-	slmb	98	6.62936	ejd_avg	8.49925	0.133172	4.9631	0	No	NONE
FBtr0083815	FBgn0038737	3R	A	NTS8	HK2	+	CG11447	2	1.58496	ejd_avg	7.10296	0.14119	1.31504	0	No	NONE
FBtr0330162	FBgn0036746	3L	A	NTS8	HK2	-	Crtc	2	1.58496	ejd_avg	8.58296	0.141304	5.88349	0	No	NONE
FBtr0074873	FBgn0261283	3L	A	NTS8	HK2	+	HLH106	12	3.70044	ejd_avg	9.59584	0.143457	5.90857	0	No	NONE
FBtr0334580	FBgn0040575	3R	A	NTS8	HK2	-	CG15922	32	5.04439	ejd_avg	8.0595	0.144623	7.58449	0	No	NONE
FBtr0084796	FBgn0039260	3R	A	NTS8	HK2	-	Smg6	20	4.39232	ejd_avg	9.51454	0.145152	8.39956	0	No	NONE
FBtr0088533	FBgn0050338	2R	A	NTS8	HK2	+	CG30338	15	4	ejd_avg	6.05292	0.14684	5.54111	1	Yes	DIFF
FBtr0077835	FBgn0031399	2L	A	NTS8	HK2	+	mio	9	3.32193	ejd_avg	8.09333	0.147031	6.71727	0	No	NONE
FBtr0079259	FBgn0031815	2L	A	NTS8	HK2	+	frj	15	4	ejd_avg	8.78684	0.149102	5.66798	0	No	NONE
FBtr0076202	FBgn0036118	3L	A	NTS8	HK2	+	blos2	9	3.32193	ejd_avg	7.81862	0.155225	4.45699	0	No	NONE
FBtr0083632	FBgn0038627	3R	A	NTS8	HK2	+	CG7694	4	2.32193	ejd_avg	8.39009	0.159976	7.60161	0	No	NONE
FBtr0073229	FBgn0035519	3L	A	NTS8	HK2	+	CG1309	61	5.9542	ejd_avg	10.2742	0.167346	9.09689	0	No	NONE
FBtr0089970	FBgn0034405	2R	A	NTS8	HK2	-	Jheh2	39	5.32193	ejd_avg	11.4094	0.170352	7.88937	0	No	NONE
FBtr0072759	FBgn0035248	3L	A	NTS8	HK2	+	CG13919	2	1.58496	ejd_avg	7.95397	0.170647	5.04207	0	No	NONE
FBtr0084873	FBgn0039291	3R	A	NTS8	HK2	-	CG13663	20	4.39232	ejd_avg	8.91263	0.181001	6.34816	0	No	NONE
FBtr0075210	FBgn0052177	3L	A	NTS8	HK2	-	Ndfip	47	5.58496	ejd_avg	9.97891	0.181085	6.62614	0	No	NONE
FBtr0087264	FBgn0034061	2R	A	NTS8	HK2	-	CG8386	25	4.70044	ejd_avg	10.0158	0.181457	5.56213	0	No	NONE
FBtr0072792	FBgn0035270	3L	A	NTS8	HK2	-	CG13933	3	2	ejd_avg	7.41969	0.183919	5.07301	0	No	NONE
FBtr0076791	FBgn0035793	3L	A	NTS8	HK2	+	CG7546	14	3.90689	ejd_avg	8.68802	0.190978	7.31787	0	No	NONE
FBtr0080427	FBgn0028965	2L	A	NTS8	HK2	-	A16	139	7.12928	ejd_avg	8.73629	0.191338	8.20297	0	No	NONE
FBtr0072203	FBgn0019948	2R	A	NTS8	HK2	-	Phm	56	5.83289	ejd_avg	11.8496	0.191391	8.21807	0	No	NONE
FBtr0335247	FBgn0039528	3R	A	NTS8	HK2	-	dsd	5	2.58496	ejd_avg	9.51482	0.193379	4.70269	0	No	NONE
FBtr0079957	FBgn0024320	2L	A	NTS8	HK2	-	Npc1a	17	4.16993	ejd_avg	10.8748	0.197954	8.50075	0	No	NONE
FBtr0072437	FBgn0040666	2R	A	NTS8	HK2	-	CG12848	35	5.16993	fsv_avg	8.67212	0.069204	7.17126	1	Yes	SAME
FBtr0087440	FBgn0033961	2R	A	NTS8	HK2	+	CG12859	58	5.88264	fsv_avg	10.0723	0.0788762	8.29206	0	No	NONE
FBtr0087861	FBgn0011227	2R	A	NTS8	HK2	-	ox	114	6.84549	fsv_avg	11.0877	0.0803888	9.76936	0	No	NONE
FBtr0087212	FBgn0014020	2R	A	NTS8	HK2	+	Rho1	106	6.74147	fsv_avg	11.2611	0.0838456	8.62134	0	No	NONE
FBtr0084172	FBgn0019957	3R	A	NTS8	HK2	+	ND42	53	5.75489	fsv_avg	10.9369	0.0839062	9.43981	0	No	NONE
FBtr0081164	FBgn0002031	2L	A	NTS8	HK2	-	l(2)37Cc	65	6.04439	fsv_avg	10.2078	0.0849374	9.3864	0	No	NONE
FBtr0072867	FBgn0004636	3L	A	NTS8	HK2	-	R	13	3.80735	fsv_avg	10.551	0.0899255	7.25502	0	No	NONE
FBtr0073158	FBgn0035469	3L	A	NTS8	HK2	+	CG14977	42	5.42626	fsv_avg	9.29557	0.0954533	6.73174	0	No	NONE
FBtr0080398	FBgn0032453	2L	A	NTS8	HK2	+	CG6180	175	7.45943	fsv_avg	10.8749	0.0956689	9.17578	0	No	NONE
FBtr0079444	FBgn0031912	2L	A	NTS8	HK2	+	CG5261	107	6.75489	fsv_avg	10.9989	0.0958807	10.1507	0	No	NONE
FBtr0080641	FBgn0028530	2L	A	NTS8	HK2	-	mTTF	4	2.32193	fsv_avg	7.51333	0.0967064	5.58145	0	No	NONE
FBtr0335285	FBgn0033050	2R	A	NTS8	HK2	+	Pngl	11	3.58496	fsv_avg	8.88235	0.097122	6.96435	0	No	NONE
FBtr0078693	FBgn0041191	3R	A	NTS8	HK2	+	Rheb	33	5.08746	fsv_avg	9.91044	0.104295	7.77449	1	Yes	SAME
FBtr0078860	FBgn0087013	3R	A	NTS8	HK2	+	Karybeta3	119	6.90689	fsv_avg	11.4216	0.108234	9.27534	0	No	NONE
FBtr0084595	FBgn0039140	3R	A	NTS8	HK2	-	Miro	134	7.07682	fsv_avg	9.07896	0.112745	7.30385	0	No	NONE
FBtr0085370	FBgn0039636	3R	A	NTS8	HK2	+	Atg14	55	5.80735	fsv_avg	8.08368	0.115745	7.29157	0	No	NONE
FBtr0331936	FBgn0033570	2R	A	NTS8	HK2	-	CG7712	46	5.55459	fsv_avg	11.1205	0.115938	8.87245	0	No	NONE
FBtr0089735	FBgn0032202	2L	A	NTS8	HK2	+	CG18619	72	6.18982	fsv_avg	9.95549	0.117864	5.36799	0	No	NONE
FBtr0085603	FBgn0039737	3R	A	NTS8	HK2	-	CG7920	254	7.99435	fsv_avg	12.128	0.117975	10.252	0	No	NONE
FBtr0080771	FBgn0001989	2L	A	NTS8	HK2	-	l(2)35Di	58	5.88264	fsv_avg	10.989	0.120656	8.51324	0	No	NONE
FBtr0077867	FBgn0001125	2L	A	NTS8	HK2	-	Got2	188	7.56224	fsv_avg	12.0132	0.120988	9.77365	0	No	NONE
FBtr0076362	FBgn0036053	3L	A	NTS8	HK2	-	iPLA2-VIA	18	4.24793	fsv_avg	9.30655	0.126744	6.7324	0	No	NONE
FBtr0075018	FBgn0017578	3L	A	NTS8	HK2	-	Max	11	3.58496	fsv_avg	8.56993	0.127045	6.60339	0	No	NONE
FBtr0089437	FBgn0005278	2L	A	NTS8	HK2	+	Sam-S	12	3.70044	fsv_avg	11.8481	0.128858	8.05873	0	No	NONE
FBtr0100010	FBgn0053969	3L	A	NTS8	HK2	-	CG33969	11	3.58496	fsv_avg	7.73244	0.130144	5.06151	0	No	NONE
FBtr0085536	FBgn0039697	3R	A	NTS8	HK2	-	CG7834	36	5.20945	fsv_avg	11.8608	0.133491	6.91266	0	No	NONE
FBtr0079806	FBgn0012036	2L	A	NTS8	HK2	+	Aldh	561	9.13443	fsv_avg	11.9615	0.135108	10.5135	0	No	NONE
FBtr0113421	FBgn0052068	3L	A	NTS8	HK2	+	CG32068	20	4.39232	fsv_avg	11.0559	0.136423	7.52392	0	No	NONE
FBtr0273398	FBgn0035770	3L	A	NTS8	HK2	-	pst	10	3.45943	fsv_avg	12.0917	0.138216	7.95239	0	No	NONE
FBtr0084835	FBgn0039335	3R	A	NTS8	HK2	+	Vps33B	8	3.16993	fsv_avg	6.66135	0.140734	5.72871	0	No	NONE
FBtr0083503	FBgn0038519	3R	A	NTS8	HK2	-	Prx3	70	6.14975	fsv_avg	10.095	0.141167	7.68169	0	No	NONE
FBtr0308813	FBgn0036820	3L	A	NTS8	HK2	+	CG6852	56	5.83289	fsv_avg	11.3709	0.141422	6.51128	0	No	NONE
FBtr0072480	FBgn0035107	3L	A	NTS8	HK2	+	mri	22	4.52356	fsv_avg	9.4217	0.143415	7.07237	0	No	NONE
FBtr0082015	FBgn0037644	3R	A	NTS8	HK2	-	CG11964	17	4.16993	fsv_avg	6.24781	0.147769	6.06533	0	No	NONE
FBtr0079858	FBgn0028479	2L	A	NTS8	HK2	-	Mtpalpha	16	4.08746	fsv_avg	11.7665	0.148894	7.15277	0	No	NONE
FBtr0088860	FBgn0033247	2R	A	NTS8	HK2	+	Nup44A	42	5.42626	fsv_avg	8.61878	0.149102	7.57627	0	No	NONE
FBtr0081881	FBgn0037607	3R	A	NTS8	HK2	+	CG8036	307	8.26679	fsv_avg	11.8484	0.153297	9.80119	0	No	NONE
FBtr0074940	FBgn0036888	3L	A	NTS8	HK2	+	CG9330	21	4.45943	fsv_avg	9.94485	0.15372	7.18324	0	No	NONE
FBtr0332914	FBgn0050010	2R	A	NTS8	HK2	+	CG30010	0	0	fsv_avg	7.32638	0.154873	1.79269	1	Yes	DIFF
FBtr0301459	FBgn0032940	2L	A	NTS8	HK2	-	Mio	3	2	fsv_avg	9.73992	0.156031	6.6125	0	No	NONE
FBtr0076693	FBgn0035850	3L	A	NTS8	HK2	+	Atg18	5	2.58496	fsv_avg	9.77958	0.156556	6.14879	0	No	NONE
FBtr0089338	FBgn0014018	3R	A	NTS8	HK2	-	Rel	5	2.58496	fsv_avg	9.95557	0.157214	5.31028	0	No	NONE
FBtr0082290	FBgn0011768	3R	A	NTS8	HK2	-	Fdh	34	5.12928	fsv_avg	11.1093	0.163617	7.98639	0	No	NONE
FBtr0088082	FBgn0010516	2R	A	NTS8	HK2	-	wal	41	5.39232	fsv_avg	11.7989	0.164732	6.98982	0	No	NONE
FBtr0083688	FBgn0038639	3R	A	NTS8	HK2	-	CG7705	4	2.32193	fsv_avg	8.00086	0.167388	5.52172	0	No	NONE
FBtr0085627	FBgn0039767	3R	A	NTS8	HK2	-	CG2218	20	4.39232	fsv_avg	9.64799	0.167936	8.0975	0	No	NONE
FBtr0100532	FBgn0035964	3L	A	NTS8	HK2	+	Dhpr	3	2	fsv_avg	8.92641	0.168264	4.50549	0	No	NONE
FBtr0086916	FBgn0034215	2R	A	NTS8	HK2	+	CG4802	31	5	fsv_avg	10.1283	0.171338	7.31566	0	No	NONE
FBtr0080439	FBgn0032482	2L	A	NTS8	HK2	+	Pect	118	6.89482	fsv_avg	11.7565	0.176471	10.588	0	No	NONE
FBtr0075995	FBgn0046296	3L	A	NTS8	HK2	+	CG11534	3	2	fsv_avg	8.15013	0.178123	4.77367	0	No	NONE
FBtr0305050	FBgn0039492	3R	A	NTS8	HK2	-	CG6051	69	6.12928	fsv_avg	8.80539	0.178498	5.43889	0	No	NONE
FBtr0301135	FBgn0036211	3L	A	NTS8	HK2	-	CG5946	34	5.12928	fsv_avg	11.2592	0.178784	7.00116	0	No	NONE
FBtr0072141	FBgn0023477	2R	A	NTS8	HK2	+	Tal	61	5.9542	fsv_avg	12.1658	0.179413	6.89327	0	No	NONE
FBtr0082112	FBgn0037713	3R	A	NTS8	HK2	-	CG16790	1	1	fsv_avg	5.32417	0.182179	0	0	No	NONE
FBtr0300283	FBgn0034432	2R	A	NTS8	HK2	+	CG7461	15	4	fsv_avg	12.1067	0.182773	6.62076	0	No	NONE
FBtr0085447	FBgn0039674	3R	A	NTS8	HK2	+	CG1907	13	3.80735	fsv_avg	10.5419	0.183803	6.04593	0	No	NONE
FBtr0332090	FBgn0052103	3L	A	NTS8	HK2	-	CG32103	21	4.45943	fsv_avg	9.68448	0.184678	6.55284	0	No	NONE
FBtr0083523	FBgn0038552	3R	A	NTS8	HK2	-	CG18012	11	3.58496	fsv_avg	9.5986	0.186116	5.69735	0	No	NONE
FBtr0112892	FBgn0017558	2R	A	NTS8	HK2	+	Pdk	1	1	fsv_avg	10.6125	0.186489	1.73272	0	No	NONE
FBtr0089063	FBgn0016126	4	A	NTS8	HK2	+	CaMKI	2	1.58496	fsv_avg	11.9269	0.18785	6.28949	0	No	NONE
FBtr0081500	FBgn0032922	2L	A	NTS8	HK2	-	CG9249	15	4	fsv_avg	8.21375	0.188296	7.18779	0	No	NONE
FBtr0077654	FBgn0031500	2L	A	NTS8	HK2	+	CG17221	9	3.32193	fsv_avg	7.34874	0.189501	5.47966	0	No	NONE
FBtr0077453	FBgn0019982	2L	A	NTS8	HK2	-	Gs1l	25	4.70044	fsv_avg	9.8199	0.19025	5.82505	0	No	NONE
FBtr0084282	FBgn0038984	3R	A	NTS8	HK2	-	CG5315	86	6.44294	fsv_avg	12.1064	0.191739	6.74256	0	No	NONE
FBtr0300397	FBgn0010470	2R	A	NTS8	HK2	-	Fkbp13	18	4.24793	fsv_avg	12.3533	0.193921	5.96877	1	Yes	SAME
FBtr0077953	FBgn0031298	2L	A	NTS8	HK2	+	Atg4	8	3.16993	fsv_avg	9.58495	0.197964	5.43122	0	No	NONE
FBtr0089304	FBgn0000721	2L	A	NTS8	HK2	-	for	4	2.32193	fsv_avg	12.2428	0.198071	7.50626	0	No	NONE
FBtr0273412	FBgn0031752	2L	A	NTS8	HK2	+	CG9044	5	2.58496	fsv_avg	9.01353	0.198077	5.70353	0	No	NONE
FBtr0082595	FBgn0004103	3R	A	NTS8	HK2	-	Pp1-87B	72	6.18982	lcns_avg	10.4509	0.0628455	8.15985	0	No	NONE
FBtr0079525	FBgn0004177	2L	A	NTS8	HK2	+	mts	51	5.70044	lcns_avg	9.87654	0.0768662	7.4104	1	Yes	SAME
FBtr0088063	FBgn0033656	2R	A	NTS8	HK2	-	S2P	21	4.45943	lcns_avg	7.4661	0.0805599	7.1633	0	No	NONE
FBtr0084547	FBgn0027103	3R	A	NTS8	HK2	+	sec10	4	2.32193	lcns_avg	7.41069	0.0826954	6.51713	1	Yes	DIFF
FBtr0342928	FBgn0032725	2L	A	NTS8	HK2	-	Nedd8	35	5.16993	lcns_avg	9.57183	0.083416	8.40068	0	No	NONE
FBtr0339789	FBgn0260439	2L	A	NTS8	HK2	+	Pp2A-29B	88	6.47573	lcns_avg	9.73167	0.0834905	8.2648	0	No	NONE
FBtr0082910	FBgn0020510	3R	A	NTS8	HK2	-	Abi	25	4.70044	lcns_avg	8.4776	0.0874955	7.57295	0	No	NONE
FBtr0100354	FBgn0036306	3L	A	NTS8	HK2	-	CG10973	9	3.32193	lcns_avg	7.44959	0.0875724	7.23792	0	No	NONE
FBtr0078985	FBgn0037220	3R	A	NTS8	HK2	-	CG14641	59	5.90689	lcns_avg	9.14917	0.0914433	8.27203	0	No	NONE
FBtr0083085	FBgn0038320	3R	A	NTS8	HK2	+	Sra-1	6	2.80735	lcns_avg	9.86195	0.0975453	6.75087	0	No	NONE
FBtr0086141	FBgn0259483	2R	A	NTS8	HK2	-	Mob4	86	6.44294	lcns_avg	10.3629	0.0980903	9.84056	0	No	NONE
FBtr0088859	FBgn0027054	2R	A	NTS8	HK2	+	CSN4	39	5.32193	lcns_avg	8.95902	0.0995984	7.80929	0	No	NONE
FBtr0076735	FBgn0042112	3L	A	NTS8	HK2	-	mRpL36	108	6.76818	lcns_avg	8.06778	0.0996327	7.15819	0	No	NONE
FBtr0078269	FBgn0027055	3L	A	NTS8	HK2	-	CSN3	22	4.52356	lcns_avg	8.50657	0.102287	7.89613	0	No	NONE
FBtr0076753	FBgn0035830	3L	A	NTS8	HK2	+	CG8209	94	6.56986	lcns_avg	8.57824	0.106218	7.95279	0	No	NONE
FBtr0082656	FBgn0038080	3R	A	NTS8	HK2	+	CG12279	139	7.12928	lcns_avg	8.77788	0.106381	8.08361	0	No	NONE
FBtr0081824	FBgn0037533	3R	A	NTS8	HK2	-	CD98hc	25	4.70044	lcns_avg	10.6907	0.108451	7.44886	1	Yes	SAME
FBtr0331790	FBgn0035688	3L	A	NTS8	HK2	-	CG10289	3	2	lcns_avg	7.72979	0.109203	5.50847	0	No	NONE
FBtr0088742	FBgn0028836	2R	A	NTS8	HK2	+	CSN7	173	7.44294	lcns_avg	8.9782	0.110811	8.84516	0	No	NONE
FBtr0071994	FBgn0034802	2R	A	NTS8	HK2	-	CG3800	300	8.23362	lcns_avg	10.9827	0.111813	8.65685	0	No	NONE
FBtr0310028	FBgn0010602	2L	A	NTS8	HK2	-	lwr	74	6.22882	lcns_avg	10.9044	0.113385	8.9759	0	No	NONE
FBtr0070038	FBgn0010215	3L	A	NTS8	HK2	-	alpha-Cat	7	3	lcns_avg	9.9737	0.114488	7.79265	0	No	NONE
FBtr0339538	FBgn0022984	2R	A	NTS8	HK2	-	qkr58E-3	49	5.64386	lcns_avg	9.30752	0.115151	8.14945	0	No	NONE
FBtr0087764	FBgn0033810	2R	A	NTS8	HK2	-	CG4646	34	5.12928	lcns_avg	7.87278	0.116978	6.0278	0	No	NONE
FBtr0333489	FBgn0004915	2L	A	NTS8	HK2	+	TfIIB	83	6.39232	lcns_avg	9.46393	0.117259	8.47542	0	No	NONE
FBtr0088821	FBgn0033260	2R	A	NTS8	HK2	-	Cul-4	9	3.32193	lcns_avg	8.66432	0.118386	6.11639	0	No	NONE
FBtr0075208	FBgn0036735	3L	A	NTS8	HK2	-	Edc3	7	3	lcns_avg	7.47634	0.118662	4.29752	0	No	NONE
FBtr0082612	FBgn0038016	3R	A	NTS8	HK2	-	MBD-R2	32	5.04439	lcns_avg	7.84021	0.120264	7.63699	0	No	NONE
FBtr0085484	FBgn0000247	3R	A	NTS8	HK2	+	ca	10	3.45943	lcns_avg	7.64518	0.120376	6.12984	0	No	NONE
FBtr0080213	FBgn0020270	2L	A	NTS8	HK2	+	mre11	2	1.58496	lcns_avg	8.34215	0.121104	5.24155	0	No	NONE
FBtr0087179	FBgn0034109	2R	A	NTS8	HK2	-	CG7747	1	1	lcns_avg	6.94592	0.121912	4.76219	0	No	NONE
FBtr0079650	FBgn0032030	2L	A	NTS8	HK2	+	Wdr82	21	4.45943	lcns_avg	8.62975	0.122537	6.58886	0	No	NONE
FBtr0081834	FBgn0037573	3R	A	NTS8	HK2	+	eIF4AIII	63	6	lcns_avg	9.86232	0.124308	7.98566	0	No	NONE
FBtr0082801	FBgn0004587	3R	A	NTS8	HK2	+	B52	38	5.2854	lcns_avg	11.2418	0.125146	8.23363	0	No	NONE
FBtr0078667	FBgn0037382	3R	A	NTS8	HK2	-	Hpr1	36	5.20945	lcns_avg	7.19339	0.125807	6.75685	0	No	NONE
FBtr0082122	FBgn0003205	3R	A	NTS8	HK2	-	Ras85D	16	4.08746	lcns_avg	10.2495	0.125831	6.93662	0	No	NONE
FBtr0081205	FBgn0032781	2L	A	NTS8	HK2	+	CG9987	24	4.64386	lcns_avg	8.39617	0.128181	6.80602	0	No	NONE
FBtr0084183	FBgn0038927	3R	A	NTS8	HK2	-	CG6015	32	5.04439	lcns_avg	7.54732	0.128895	6.79729	0	No	NONE
FBtr0074941	FBgn0010417	3L	A	NTS8	HK2	+	Taf6	28	4.85798	lcns_avg	7.90441	0.130424	5.94166	0	No	NONE
FBtr0083292	FBgn0027053	3R	A	NTS8	HK2	+	CSN5	73	6.20945	lcns_avg	8.868	0.130804	7.45988	0	No	NONE
FBtr0331572	FBgn0036096	3L	A	NTS8	HK2	+	CG8003	37	5.24793	lcns_avg	7.21567	0.131395	6.38981	0	No	NONE
FBtr0082061	FBgn0037700	3R	A	NTS8	HK2	+	CG8149	27	4.80735	lcns_avg	8.58255	0.132208	6.89904	0	No	NONE
FBtr0088420	FBgn0003071	2R	A	NTS8	HK2	+	Pfk	100	6.65821	lcns_avg	10.0338	0.132943	9.85384	0	No	NONE
FBtr0076473	FBgn0036000	3L	A	NTS8	HK2	-	CG3434	8	3.16993	lcns_avg	7.42062	0.13356	6.11203	0	No	NONE
FBtr0079958	FBgn0032193	2L	A	NTS8	HK2	-	CG5727	56	5.83289	lcns_avg	8.23683	0.133681	8.18168	0	No	NONE
FBtr0074847	FBgn0036964	3L	A	NTS8	HK2	-	CG6480	13	3.80735	lcns_avg	7.93365	0.133773	5.6557	0	No	NONE
FBtr0077454	FBgn0031607	2L	A	NTS8	HK2	-	CG15440	51	5.70044	lcns_avg	7.09225	0.134524	6.20063	0	No	NONE
FBtr0072235	FBgn0034915	2R	A	NTS8	HK2	-	eIF6	89	6.49185	lcns_avg	8.46496	0.135504	7.89968	0	No	NONE
FBtr0080112	FBgn0032293	2L	A	NTS8	HK2	+	Dpy-30L1	90	6.50779	lcns_avg	7.77196	0.136138	6.82274	0	No	NONE
FBtr0080466	FBgn0051852	2L	A	NTS8	HK2	+	Tap42	22	4.52356	lcns_avg	7.92579	0.137512	7.21761	0	No	NONE
FBtr0080445	FBgn0032488	2L	A	NTS8	HK2	+	CG16812	33	5.08746	lcns_avg	8.02918	0.138161	7.62158	0	No	NONE
FBtr0308119	FBgn0010313	3R	A	NTS8	HK2	-	corto	2	1.58496	lcns_avg	10.0255	0.138256	5.24405	0	No	NONE
FBtr0072083	FBgn0016762	2R	A	NTS8	HK2	+	angel	8	3.16993	lcns_avg	7.32784	0.138568	6.22879	0	No	NONE
FBtr0076844	FBgn0011640	3L	A	NTS8	HK2	+	lark	16	4.08746	lcns_avg	10.0027	0.139049	7.60507	0	No	NONE
FBtr0072287	FBgn0023081	2R	A	NTS8	HK2	-	gek	4	2.32193	lcns_avg	8.65264	0.139835	5.83171	0	No	NONE
FBtr0072120	FBgn0015372	2R	A	NTS8	HK2	-	RabX1	36	5.20945	lcns_avg	7.97503	0.140143	7.01076	0	No	NONE
FBtr0081684	FBgn0010355	3R	A	NTS8	HK2	+	Taf1	12	3.70044	lcns_avg	8.08828	0.140399	6.74696	0	No	NONE
FBtr0300415	FBgn0037657	3R	A	NTS8	HK2	+	hyx	9	3.32193	lcns_avg	7.93442	0.1405	6.40332	0	No	NONE
FBtr0080484	FBgn0032485	2L	A	NTS8	HK2	-	CG9426	17	4.16993	lcns_avg	8.63731	0.140616	6.96386	0	No	NONE
FBtr0079048	FBgn0031663	2L	A	NTS8	HK2	-	CG8891	7	3	lcns_avg	8.43751	0.140688	5.49853	0	No	NONE
FBtr0071985	FBgn0010622	2R	A	NTS8	HK2	-	l(2)06496	14	3.90689	lcns_avg	7.6553	0.141396	5.36989	0	No	NONE
FBtr0077015	FBgn0035692	3L	A	NTS8	HK2	-	CG13298	86	6.44294	lcns_avg	10.4436	0.141628	8.79873	0	No	NONE
FBtr0084551	FBgn0039158	3R	A	NTS8	HK2	+	CG6182	2	1.58496	lcns_avg	7.06614	0.141647	4.63367	0	No	NONE
FBtr0071628	FBgn0261067	2R	A	NTS8	HK2	-	LSm1	11	3.58496	lcns_avg	7.49697	0.141677	5.30727	0	No	NONE
FBtr0078510	FBgn0011771	3L	A	NTS8	HK2	-	Hem	2	1.58496	lcns_avg	8.5477	0.142337	5.62232	0	No	NONE
FBtr0078432	FBgn0037121	3L	A	NTS8	HK2	+	Rpb8	28	4.85798	lcns_avg	8.84314	0.143357	7.61599	1	Yes	DIFF
FBtr0072909	FBgn0035318	3L	A	NTS8	HK2	-	CG9018	53	5.75489	lcns_avg	7.79582	0.145427	6.44873	1	Yes	DIFF
FBtr0307071	FBgn0031759	2L	A	NTS8	HK2	-	lid	8	3.16993	lcns_avg	9.07379	0.14561	6.64475	0	No	NONE
FBtr0089204	FBgn0002521	4	A	NTS8	HK2	-	pho	12	3.70044	lcns_avg	9.91613	0.146021	8.22255	0	No	NONE
FBtr0072520	FBgn0024806	3L	A	NTS8	HK2	-	DIP2	5	2.58496	lcns_avg	8.85908	0.146128	8.04723	1	Yes	DIFF
FBtr0071526	FBgn0034572	2R	A	NTS8	HK2	+	CG9346	7	3	lcns_avg	7.69529	0.146427	5.07361	1	Yes	SAME
FBtr0333492	FBgn0015320	2L	A	NTS8	HK2	-	UbcD2	117	6.88264	lcns_avg	10.2692	0.146569	9.32757	0	No	NONE
FBtr0310621	FBgn0004237	3R	A	NTS8	HK2	-	Hrb87F	47	5.58496	lcns_avg	10.4377	0.146612	6.98728	0	No	NONE
FBtr0083092	FBgn0038327	3R	A	NTS8	HK2	+	Trax	20	4.39232	lcns_avg	8.04127	0.146703	6.89931	0	No	NONE
FBtr0084458	FBgn0039116	3R	A	NTS8	HK2	+	CG10375	46	5.55459	lcns_avg	8.02206	0.147358	6.69947	0	No	NONE
FBtr0087548	FBgn0033929	2R	A	NTS8	HK2	+	Tfb1	35	5.16993	lcns_avg	7.86027	0.148511	7.50677	0	No	NONE
FBtr0077735	FBgn0026324	2L	A	NTS8	HK2	-	Taf10b	99	6.64386	lcns_avg	8.14365	0.148776	7.26161	0	No	NONE
FBtr0110818	FBgn0001316	3L	A	NTS8	HK2	-	klar	4	2.32193	lcns_avg	9.33425	0.15098	6.623	0	No	NONE
FBtr0088179	FBgn0033609	2R	A	NTS8	HK2	-	fbl6	4	2.32193	lcns_avg	8.27845	0.152673	4.67998	0	No	NONE
FBtr0083087	FBgn0051301	3R	A	NTS8	HK2	+	CG31301	16	4.08746	lcns_avg	9.36453	0.152765	7.65777	0	No	NONE
FBtr0072223	FBgn0034921	2R	A	NTS8	HK2	-	Dcp1	16	4.08746	lcns_avg	7.77424	0.153681	5.37885	0	No	NONE
FBtr0308803	FBgn0032600	2L	A	NTS8	HK2	+	CG17912	5	2.58496	lcns_avg	8.16795	0.153775	5.38721	0	No	NONE
FBtr0086780	FBgn0034304	2R	A	NTS8	HK2	-	CG5742	2	1.58496	lcns_avg	7.18785	0.156717	4.56581	0	No	NONE
FBtr0082830	FBgn0038183	3R	A	NTS8	HK2	+	CG9286	8	3.16993	lcns_avg	8.09706	0.156741	5.85023	0	No	NONE
FBtr0078751	FBgn0014366	3R	A	NTS8	HK2	-	noi	28	4.85798	lcns_avg	8.9905	0.156835	7.41884	0	No	NONE
FBtr0078768	FBgn0037330	3R	A	NTS8	HK2	-	mRpL44	14	3.90689	lcns_avg	8.65105	0.157212	5.93559	0	No	NONE
FBtr0087647	FBgn0000662	2R	A	NTS8	HK2	-	fl(2)d	6	2.80735	lcns_avg	8.34217	0.157625	5.22055	0	No	NONE
FBtr0075198	FBgn0004401	3L	A	NTS8	HK2	-	Pep	92	6.53916	lcns_avg	10.5506	0.15769	8.47186	1	Yes	DIFF
FBtr0078272	FBgn0037026	3L	A	NTS8	HK2	-	CG3634	15	4	lcns_avg	7.75285	0.158268	5.62851	0	No	NONE
FBtr0086483	FBgn0015949	2R	A	NTS8	HK2	-	hrg	15	4	lcns_avg	8.60807	0.158524	6.70815	0	No	NONE
FBtr0087623	FBgn0033859	2R	A	NTS8	HK2	+	CG6197	12	3.70044	lcns_avg	7.33584	0.159063	4.33248	0	No	NONE
FBtr0080544	FBgn0026373	2L	A	NTS8	HK2	+	RpII33	25	4.70044	lcns_avg	8.51266	0.160156	6.03203	0	No	NONE
FBtr0084815	FBgn0039305	3R	A	NTS8	HK2	+	CG11858	21	4.45943	lcns_avg	8.5171	0.160474	6.45524	0	No	NONE
FBtr0073232	FBgn0035523	3L	A	NTS8	HK2	+	CG1311	3	2	lcns_avg	8.60191	0.160602	5.84584	0	No	NONE
FBtr0080695	FBgn0028926	2L	A	NTS8	HK2	+	NC2beta	53	5.75489	lcns_avg	6.9164	0.160618	6.46893	0	No	NONE
FBtr0077765	FBgn0031420	2L	A	NTS8	HK2	+	CG9866	24	4.64386	lcns_avg	8.07186	0.160685	6.51598	0	No	NONE
FBtr0082006	FBgn0040534	3R	A	NTS8	HK2	-	CG11985	39	5.32193	lcns_avg	9.2934	0.16076	7.94326	0	No	NONE
FBtr0087977	FBgn0004463	2R	A	NTS8	HK2	+	RpIII128	3	2	lcns_avg	6.88987	0.161394	4.42936	1	Yes	DIFF
FBtr0083771	FBgn0086613	3R	A	NTS8	HK2	-	Ino80	5	2.58496	lcns_avg	7.12933	0.16141	6.10804	0	No	NONE
FBtr0079590	FBgn0015299	2L	A	NTS8	HK2	+	Ssb-c31a	34	5.12928	lcns_avg	9.76579	0.161683	8.10313	0	No	NONE
FBtr0077684	FBgn0031479	2L	A	NTS8	HK2	-	Prx6005	15	4	lcns_avg	8.20214	0.162134	6.71034	0	No	NONE
FBtr0087696	FBgn0004638	2R	A	NTS8	HK2	-	drk	14	3.90689	lcns_avg	9.55298	0.162362	6.11602	0	No	NONE
FBtr0088567	FBgn0033378	2R	A	NTS8	HK2	+	tsu	55	5.80735	lcns_avg	9.89799	0.163253	7.12629	0	No	NONE
FBtr0075054	FBgn0036811	3L	A	NTS8	HK2	+	MED11	2	1.58496	lcns_avg	8.32497	0.163261	5.02411	0	No	NONE
FBtr0300923	FBgn0050122	2R	A	NTS8	HK2	-	CG30122	32	5.04439	lcns_avg	10.2726	0.163347	7.7424	0	No	NONE
FBtr0075642	FBgn0036487	3L	A	NTS8	HK2	+	Prp31	41	5.39232	lcns_avg	8.07029	0.163658	6.88469	0	No	NONE
FBtr0076458	FBgn0015296	3L	A	NTS8	HK2	+	Shc	48	5.61471	lcns_avg	8.18183	0.163677	7.1096	0	No	NONE
FBtr0088774	FBgn0020279	2R	A	NTS8	HK2	+	lig	45	5.52356	lcns_avg	9.36495	0.163721	5.33458	0	No	NONE
FBtr0082311	FBgn0051390	3R	A	NTS8	HK2	-	MED7	28	4.85798	lcns_avg	8.02177	0.163784	6.20029	0	No	NONE
FBtr0072791	FBgn0035271	3L	A	NTS8	HK2	-	CG2021	37	5.24793	lcns_avg	8.84904	0.164256	6.86456	0	No	NONE
FBtr0075448	FBgn0010280	3L	A	NTS8	HK2	+	Taf4	33	5.08746	lcns_avg	9.38042	0.164275	4.62708	0	No	NONE
FBtr0114604	FBgn0024555	3R	A	NTS8	HK2	+	flfl	20	4.39232	lcns_avg	10.1301	0.164417	5.56885	0	No	NONE
FBtr0083965	FBgn0051223	3R	A	NTS8	HK2	+	CG31223	5	2.58496	lcns_avg	6.45964	0.164493	2.48636	0	No	NONE
FBtr0081062	FBgn0032671	2L	A	NTS8	HK2	-	CG7200	15	4	lcns_avg	8.10532	0.164803	7.54523	0	No	NONE
FBtr0331935	FBgn0033571	2R	A	NTS8	HK2	-	Rpb5	10	3.45943	lcns_avg	8.89485	0.165103	6.43692	0	No	NONE
FBtr0343128	FBgn0031777	2L	A	NTS8	HK2	-	CG9154	15	4	lcns_avg	7.36312	0.165809	5.46806	0	No	NONE
FBtr0081987	FBgn0000412	3R	A	NTS8	HK2	-	D1	149	7.22882	lcns_avg	10.9339	0.166377	9.53047	0	No	NONE
FBtr0100161	FBgn0020496	3R	A	NTS8	HK2	+	CtBP	8	3.16993	lcns_avg	9.25814	0.166932	5.87722	0	No	NONE
FBtr0081072	FBgn0032690	2L	A	NTS8	HK2	+	CG10333	12	3.70044	lcns_avg	8.41439	0.167632	5.80083	0	No	NONE
FBtr0332340	FBgn0031266	2L	A	NTS8	HK2	+	CG2807	7	3	lcns_avg	8.22049	0.168086	5.67675	0	No	NONE
FBtr0084309	FBgn0039019	3R	A	NTS8	HK2	+	HP1c	111	6.80735	lcns_avg	8.2718	0.169355	7.19838	0	No	NONE
FBtr0084265	FBgn0028837	3R	A	NTS8	HK2	+	CSN6	67	6.08746	lcns_avg	8.03146	0.169536	6.8326	0	No	NONE
FBtr0078075	FBgn0021874	2L	A	NTS8	HK2	-	Nle	9	3.32193	lcns_avg	7.16435	0.170253	4.90423	0	No	NONE
FBtr0079635	FBgn0003607	2L	A	NTS8	HK2	-	Su(var)205	99	6.64386	lcns_avg	10.6744	0.170771	8.2581	0	No	NONE
FBtr0078144	FBgn0086902	2L	A	NTS8	HK2	-	kis	4	2.32193	lcns_avg	10.1016	0.170854	5.88692	0	No	NONE
FBtr0088792	FBgn0013726	2R	A	NTS8	HK2	+	pnut	22	4.52356	lcns_avg	10.053	0.171018	6.94312	0	No	NONE
FBtr0085272	FBgn0039554	3R	A	NTS8	HK2	-	CG5003	6	2.80735	lcns_avg	7.21857	0.171276	5.1677	0	No	NONE
FBtr0088966	FBgn0033160	2R	A	NTS8	HK2	+	CG11107	23	4.58496	lcns_avg	8.62549	0.171349	7.10976	0	No	NONE
FBtr0081011	FBgn0032634	2L	A	NTS8	HK2	-	Rpb11	34	5.12928	lcns_avg	9.15558	0.171475	7.15821	0	No	NONE
FBtr0075957	FBgn0036291	3L	A	NTS8	HK2	+	CG10681	4	2.32193	lcns_avg	6.71937	0.171603	6.64406	0	No	NONE
FBtr0071520	FBgn0034564	2R	A	NTS8	HK2	+	CG9344	25	4.70044	lcns_avg	9.58589	0.171678	7.53369	0	No	NONE
FBtr0083456	FBgn0025571	3R	A	NTS8	HK2	+	SF1	34	5.12928	lcns_avg	8.84254	0.17245	6.53609	0	No	NONE
FBtr0082123	FBgn0260010	3R	A	NTS8	HK2	-	rump	34	5.12928	lcns_avg	10.1668	0.173692	9.27025	0	No	NONE
FBtr0078753	FBgn0037342	3R	A	NTS8	HK2	-	CG2931	40	5.35755	lcns_avg	8.15343	0.174064	7.66042	2	Yes	MULTI
FBtr0080643	FBgn0005771	2L	A	NTS8	HK2	+	noc	1	1	lcns_avg	10.3701	0.174684	4.96018	1	Yes	SAME
FBtr0333425	FBgn0032378	2L	A	NTS8	HK2	-	CycY	21	4.45943	lcns_avg	9.02829	0.17483	6.44988	0	No	NONE
FBtr0087178	FBgn0034113	2R	A	NTS8	HK2	-	CG8060	8	3.16993	lcns_avg	6.05649	0.17488	4.97315	0	No	NONE
FBtr0088782	FBgn0033261	2R	A	NTS8	HK2	+	CG18316	4	2.32193	lcns_avg	8.48738	0.174967	5.64871	0	No	NONE
FBtr0089572	FBgn0032388	2L	A	NTS8	HK2	-	CG6686	27	4.80735	lcns_avg	9.16571	0.174976	7.61846	0	No	NONE
FBtr0079225	FBgn0031764	2L	A	NTS8	HK2	-	CG9107	19	4.32193	lcns_avg	7.40348	0.175099	6.45934	0	No	NONE
FBtr0080467	FBgn0051855	2L	A	NTS8	HK2	+	CG31855	44	5.49185	lcns_avg	8.45813	0.176069	7.6819	0	No	NONE
FBtr0072250	FBgn0034975	2R	A	NTS8	HK2	+	enok	5	2.58496	lcns_avg	7.38974	0.176274	5.13637	0	No	NONE
FBtr0085163	FBgn0039508	3R	A	NTS8	HK2	+	CG3368	3	2	lcns_avg	7.94642	0.176586	5.23724	0	No	NONE
FBtr0083825	FBgn0038760	3R	A	NTS8	HK2	+	MED25	2	1.58496	lcns_avg	6.96807	0.177144	4.29141	1	Yes	DIFF
FBtr0080191	FBgn0032298	2L	A	NTS8	HK2	-	CG6724	5	2.58496	lcns_avg	7.70798	0.177736	5.31134	0	No	NONE
FBtr0085561	FBgn0039743	3R	A	NTS8	HK2	+	CG7946	34	5.12928	lcns_avg	9.1569	0.17788	8.02107	2	Yes	MULTI
FBtr0071674	FBgn0010228	2R	A	NTS8	HK2	-	HmgZ	15	4	lcns_avg	11.128	0.179007	6.40969	0	No	NONE
FBtr0078713	FBgn0046222	3R	A	NTS8	HK2	+	CG1109	38	5.2854	lcns_avg	7.28788	0.179193	5.39965	0	No	NONE
FBtr0335484	FBgn0031493	2L	A	NTS8	HK2	-	CG3605	23	4.58496	lcns_avg	8.65454	0.179498	6.57706	1	Yes	DIFF
FBtr0072234	FBgn0021895	2R	A	NTS8	HK2	-	ytr	27	4.80735	lcns_avg	10.5812	0.180023	7.10475	1	Yes	SAME
FBtr0113179	FBgn0036804	3L	A	NTS8	HK2	-	Sgf11	65	6.04439	lcns_avg	8.01272	0.180686	6.45555	0	No	NONE
FBtr0078704	FBgn0019637	3R	A	NTS8	HK2	+	Atu	12	3.70044	lcns_avg	7.38081	0.181424	4.65169	0	No	NONE
FBtr0333706	FBgn0026869	4	A	NTS8	HK2	-	Thd1	0	0	lcns_avg	8.59314	0.18201	3.05937	0	No	NONE
FBtr0077883	FBgn0260648	2L	A	NTS8	HK2	+	Rrp40	3	2	lcns_avg	7.56838	0.182224	4.53096	1	Yes	SAME
FBtr0089918	FBgn0259139	3R	A	NTS8	HK2	-	glo	17	4.16993	lcns_avg	10.0532	0.182391	7.35774	0	No	NONE
FBtr0078876	FBgn0026417	3R	A	NTS8	HK2	-	Hus1-like	0	0	lcns_avg	6.14112	0.183002	3.50017	0	No	NONE
FBtr0072969	FBgn0035370	3L	A	NTS8	HK2	+	CG1240	184	7.53138	lcns_avg	10.3681	0.183175	8.48277	0	No	NONE
FBtr0079875	FBgn0024285	2L	A	NTS8	HK2	+	Srp54	3	2	lcns_avg	9.16709	0.183678	5.28346	0	No	NONE
FBtr0086232	FBgn0034537	2R	A	NTS8	HK2	+	DMAP1	19	4.32193	lcns_avg	8.25337	0.18499	5.55761	0	No	NONE
FBtr0075324	FBgn0036661	3L	A	NTS8	HK2	+	CG9705	48	5.61471	lcns_avg	9.69821	0.185415	8.23805	0	No	NONE
FBtr0085418	FBgn0039626	3R	A	NTS8	HK2	-	Slu7	30	4.9542	lcns_avg	6.80445	0.186317	5.58214	0	No	NONE
FBtr0084541	FBgn0040283	3R	A	NTS8	HK2	+	SMC1	9	3.32193	lcns_avg	8.34338	0.186434	5.97611	0	No	NONE
FBtr0075595	FBgn0261109	3L	A	NTS8	HK2	-	mrn	14	3.90689	lcns_avg	8.04981	0.186573	7.57482	0	No	NONE
FBtr0075230	FBgn0053051	3L	A	NTS8	HK2	-	CG33051	36	5.20945	lcns_avg	7.57125	0.186614	4.78829	0	No	NONE
FBtr0077048	FBgn0035675	3L	A	NTS8	HK2	+	CG6610	24	4.64386	lcns_avg	8.32385	0.188029	6.32329	0	No	NONE
FBtr0332410	FBgn0032454	2L	A	NTS8	HK2	-	CG5787	38	5.2854	lcns_avg	8.82423	0.188101	8.1347	0	No	NONE
FBtr0078103	FBgn0031216	2L	A	NTS8	HK2	+	Zir	1	1	lcns_avg	8.70796	0.188182	5.22285	0	No	NONE
FBtr0076274	FBgn0036104	3L	A	NTS8	HK2	-	CG6418	14	3.90689	lcns_avg	8.69974	0.188349	6.15998	0	No	NONE
FBtr0083336	FBgn0038453	3R	A	NTS8	HK2	+	CG10326	145	7.18982	lcns_avg	10.2612	0.188481	9.73118	0	No	NONE
FBtr0075523	FBgn0000212	3L	A	NTS8	HK2	-	brm	3	2	lcns_avg	10.0081	0.188953	5.75026	0	No	NONE
FBtr0078761	FBgn0037336	3R	A	NTS8	HK2	-	CG2519	4	2.32193	lcns_avg	9.62715	0.189207	5.74882	1	Yes	DIFF
FBtr0081289	FBgn0032816	2L	A	NTS8	HK2	+	Nf-YB	2	1.58496	lcns_avg	8.51402	0.190127	5.30298	0	No	NONE
FBtr0088273	FBgn0033527	2R	A	NTS8	HK2	+	CG11777	19	4.32193	lcns_avg	7.85139	0.190156	6.57401	0	No	NONE
FBtr0332464	FBgn0013756	2R	A	NTS8	HK2	+	Mtor	9	3.32193	lcns_avg	8.76034	0.190368	6.41093	0	No	NONE
FBtr0111121	FBgn0260798	2R	A	NTS8	HK2	-	Gprk1	4	2.32193	lcns_avg	9.51396	0.190507	5.72528	0	No	NONE
FBtr0078767	FBgn0025825	3R	A	NTS8	HK2	-	Hdac3	7	3	lcns_avg	8.50253	0.190892	6.34056	0	No	NONE
FBtr0086146	FBgn0033083	2R	A	NTS8	HK2	-	Dpit47	32	5.04439	lcns_avg	7.30533	0.19154	4.94003	0	No	NONE
FBtr0081914	FBgn0037622	3R	A	NTS8	HK2	+	CG8202	3	2	lcns_avg	6.76063	0.192205	4.26142	0	No	NONE
FBtr0079045	FBgn0031664	2L	A	NTS8	HK2	-	CG8892	29	4.90689	lcns_avg	8.14631	0.192457	7.66657	0	No	NONE
FBtr0086723	FBgn0261119	2R	A	NTS8	HK2	-	Prp19	6	2.80735	lcns_avg	8.86493	0.192495	5.53701	0	No	NONE
FBtr0075332	FBgn0003410	3L	A	NTS8	HK2	+	sina	100	6.65821	lcns_avg	8.98077	0.192927	4.70717	1	Yes	SAME
FBtr0072147	FBgn0034939	2R	A	NTS8	HK2	+	thoc5	10	3.45943	lcns_avg	8.25058	0.192938	6.67761	0	No	NONE
FBtr0088017	FBgn0027504	2R	A	NTS8	HK2	-	CG8878	27	4.80735	lcns_avg	8.81411	0.193235	6.57533	0	No	NONE
FBtr0075944	FBgn0036314	3L	A	NTS8	HK2	-	CG10754	26	4.75489	lcns_avg	8.43962	0.193593	6.38737	0	No	NONE
FBtr0290230	FBgn0013984	3R	A	NTS8	HK2	-	InR	1	1	lcns_avg	7.65698	0.193956	4.59869	0	No	NONE
FBtr0075954	FBgn0036277	3L	A	NTS8	HK2	+	CG10418	21	4.45943	lcns_avg	9.2679	0.194033	7.55085	0	No	NONE
FBtr0290259	FBgn0013717	3L	A	NTS8	HK2	-	not	8	3.16993	lcns_avg	7.98233	0.195493	6.0416	0	No	NONE
FBtr0081815	FBgn0037550	3R	A	NTS8	HK2	-	CG9667	8	3.16993	lcns_avg	7.28054	0.195626	4.47604	0	No	NONE
FBtr0078682	FBgn0011715	3R	A	NTS8	HK2	+	Snr1	12	3.70044	lcns_avg	9.27293	0.195695	6.43659	0	No	NONE
FBtr0072221	FBgn0034923	2R	A	NTS8	HK2	-	Upf3	36	5.20945	lcns_avg	7.17182	0.195804	6.31227	0	No	NONE
FBtr0081374	FBgn0011638	2L	A	NTS8	HK2	-	La	48	5.61471	lcns_avg	9.27887	0.196217	6.35827	0	No	NONE
FBtr0085178	FBgn0010328	3R	A	NTS8	HK2	-	woc	7	3	lcns_avg	10.0103	0.196361	5.30165	0	No	NONE
FBtr0075068	FBgn0036828	3L	A	NTS8	HK2	+	CG6841	6	2.80735	lcns_avg	7.59329	0.196398	5.24622	0	No	NONE
FBtr0300691	FBgn0037659	3R	A	NTS8	HK2	+	Kdm2	4	2.32193	lcns_avg	8.57762	0.196426	5.2614	0	No	NONE
FBtr0080934	FBgn0261068	2L	A	NTS8	HK2	-	LSm7	20	4.39232	lcns_avg	9.43093	0.197066	5.79927	0	No	NONE
FBtr0078357	FBgn0037093	3L	A	NTS8	HK2	+	Cdk12	35	5.16993	lcns_avg	8.3904	0.197489	3.59706	0	No	NONE
FBtr0078928	FBgn0037255	3R	A	NTS8	HK2	+	Fip1	22	4.52356	lcns_avg	7.25802	0.197816	5.06603	0	No	NONE
FBtr0075998	FBgn0013997	3L	A	NTS8	HK2	+	Nrx-IV	7	3	lcns_avg	9.82504	0.198112	7.85661	0	No	NONE
FBtr0071629	FBgn0034598	2R	A	NTS8	HK2	-	CG4266	15	4	lcns_avg	8.24372	0.199286	4.9592	0	No	NONE
FBtr0084505	FBgn0051184	3R	A	NTS8	HK2	+	LSm3	15	4	lcns_avg	9.22245	0.199586	6.40491	0	No	NONE
FBtr0084837	FBgn0039338	3R	A	NTS8	HK2	-	XNP	19	4.32193	lcns_avg	9.61221	0.199705	7.4736	0	No	NONE
FBtr0082049	FBgn0037686	3R	A	NTS8	HK2	-	RpL34b	228	7.8392	lfb_avg	12.3377	0.066014	9.02184	0	No	NONE
FBtr0073044	FBgn0035423	3L	A	NTS8	HK2	+	CG17737	316	8.30834	lfb_avg	11.9172	0.0813414	10.7232	0	No	NONE
FBtr0078210	FBgn0037011	3L	A	NTS8	HK2	+	CG4858	16	4.08746	lfb_avg	9.08577	0.0923074	5.79391	0	No	NONE
FBtr0076356	FBgn0036058	3L	A	NTS8	HK2	-	CG6707	14	3.90689	lfb_avg	9.4468	0.0955012	6.90703	0	No	NONE
FBtr0088499	FBgn0023143	2R	A	NTS8	HK2	-	Uba1	113	6.83289	lfb_avg	10.6373	0.102388	9.55362	0	No	NONE
FBtr0073151	FBgn0004888	3L	A	NTS8	HK2	+	Scsalpha	27	4.80735	lfb_avg	11.5538	0.104968	6.98814	0	No	NONE
FBtr0076604	FBgn0035877	3L	A	NTS8	HK2	+	CG7083	3	2	lfb_avg	7.77262	0.108851	3.10808	0	No	NONE
FBtr0083855	FBgn0038745	3R	A	NTS8	HK2	-	CG4538	240	7.91289	lfb_avg	10.8614	0.109547	8.05138	0	No	NONE
FBtr0306162	FBgn0032642	2L	A	NTS8	HK2	+	CG5110	10	3.45943	lfb_avg	9.57509	0.111798	6.50348	0	No	NONE
FBtr0100323	FBgn0037913	3R	A	NTS8	HK2	-	fabp	378	8.56605	lfb_avg	13.1806	0.11612	10.1657	0	No	NONE
FBtr0086629	FBgn0034398	2R	A	NTS8	HK2	-	CG15098	58	5.88264	lfb_avg	12.4225	0.118402	9.05842	0	No	NONE
FBtr0079631	FBgn0032005	2L	A	NTS8	HK2	-	Snx6	56	5.83289	lfb_avg	9.75813	0.119027	8.52972	0	No	NONE
FBtr0073066	FBgn0035438	3L	A	NTS8	HK2	+	PHGPx	70	6.14975	lfb_avg	11.8033	0.119052	8.77571	0	No	NONE
FBtr0089394	FBgn0033452	2R	A	NTS8	HK2	-	CG1599	48	5.61471	lfb_avg	10.0799	0.120822	7.60072	0	No	NONE
FBtr0080959	FBgn0040985	2L	A	NTS8	HK2	-	CG6115	131	7.04439	lfb_avg	11.6032	0.122878	9.31877	0	No	NONE
FBtr0079667	FBgn0027932	2L	A	NTS8	HK2	+	Akap200	112	6.82018	lfb_avg	11.4467	0.125966	9.12656	0	No	NONE
FBtr0083436	FBgn0028992	3R	A	NTS8	HK2	+	sds22	103	6.70044	lfb_avg	9.86467	0.129432	8.59877	0	No	NONE
FBtr0340331	FBgn0053198	2R	A	NTS8	HK2	+	pen-2	5	2.58496	lfb_avg	8.42995	0.137362	7.45369	0	No	NONE
FBtr0076649	FBgn0017429	3L	A	NTS8	HK2	-	CG5989	30	4.9542	lfb_avg	8.76264	0.138888	7.01547	0	No	NONE
FBtr0088898	FBgn0029093	2R	A	NTS8	HK2	-	cathD	126	6.98868	lfb_avg	12.8977	0.146257	9.202	0	No	NONE
FBtr0073076	FBgn0035444	3L	A	NTS8	HK2	+	CG12012	20	4.39232	lfb_avg	9.12522	0.153089	5.23086	0	No	NONE
FBtr0085173	FBgn0039509	3R	A	NTS8	HK2	-	bigmax	14	3.90689	lfb_avg	8.76754	0.159608	4.26075	0	No	NONE
FBtr0079640	FBgn0031992	2L	A	NTS8	HK2	-	CG8498	134	7.07682	lfb_avg	10.0391	0.159892	6.86385	0	No	NONE
FBtr0072723	FBgn0035211	3L	A	NTS8	HK2	-	CG2211	11	3.58496	lfb_avg	7.2875	0.160807	6.83076	0	No	NONE
FBtr0088463	FBgn0050000	2R	A	NTS8	HK2	+	GstT1	20	4.39232	lfb_avg	10.0496	0.161084	7.81603	0	No	NONE
FBtr0309209	FBgn0032172	2L	A	NTS8	HK2	-	CG5850	21	4.45943	lfb_avg	9.80257	0.163905	8.37635	0	No	NONE
FBtr0072484	FBgn0035109	3L	A	NTS8	HK2	+	CG13876	10	3.45943	lfb_avg	6.37112	0.164901	5.61767	0	No	NONE
FBtr0333094	FBgn0032429	2L	A	NTS8	HK2	-	CG5446	95	6.58496	lfb_avg	10.7675	0.165029	8.98767	0	No	NONE
FBtr0071726	FBgn0034674	2R	A	NTS8	HK2	+	CG9304	2	1.58496	lfb_avg	8.10603	0.165258	5.0177	0	No	NONE
FBtr0081785	FBgn0037538	3R	A	NTS8	HK2	+	CG3223	59	5.90689	lfb_avg	8.29149	0.168578	8.08802	0	No	NONE
FBtr0075777	FBgn0013563	3L	A	NTS8	HK2	+	Pex1	1	1	lfb_avg	6.53606	0.169016	5.09772	0	No	NONE
FBtr0082333	FBgn0037852	3R	A	NTS8	HK2	-	Tpc1	12	3.70044	lfb_avg	8.19112	0.169698	5.65466	0	No	NONE
FBtr0113052	FBgn0033240	2R	A	NTS8	HK2	+	CG2906	3	2	lfb_avg	6.13569	0.171869	3.78169	0	No	NONE
FBtr0077517	FBgn0031534	2L	A	NTS8	HK2	+	Snx1	55	5.80735	lfb_avg	10.6431	0.176525	8.28576	0	No	NONE
FBtr0081288	FBgn0024230	2L	A	NTS8	HK2	-	Hs2st	4	2.32193	lfb_avg	8.17974	0.178387	6.02277	0	No	NONE
FBtr0080519	FBgn0032524	2L	A	NTS8	HK2	-	CG9267	12	3.70044	lfb_avg	9.96005	0.183512	6.35319	0	No	NONE
FBtr0077670	FBgn0031491	2L	A	NTS8	HK2	-	alpha4GT1	14	3.90689	lfb_avg	9.15136	0.184012	6.4898	0	No	NONE
FBtr0306539	FBgn0067779	2L	A	NTS8	HK2	+	dbr	3	2	lfb_avg	8.68402	0.184421	5.58854	1	Yes	DIFF
FBtr0339416	FBgn0033476	2R	A	NTS8	HK2	-	oys	90	6.50779	lfb_avg	11.3157	0.188648	5.77196	0	No	NONE
FBtr0076808	FBgn0035811	3L	A	NTS8	HK2	+	CG12262	11	3.58496	lfb_avg	12.0942	0.191372	6.441	0	No	NONE
FBtr0076648	FBgn0035916	3L	A	NTS8	HK2	-	GAPsec	2	1.58496	lfb_avg	8.58859	0.191511	4.69842	0	No	NONE
FBtr0079550	FBgn0031972	2L	A	NTS8	HK2	-	Wwox	6	2.80735	lfb_avg	7.69422	0.192056	4.61271	0	No	NONE
FBtr0332421	FBgn0033608	2R	A	NTS8	HK2	+	CG13220	166	7.3837	lhg_avg	9.33598	0.0344264	8.99388	0	No	NONE
FBtr0087184	FBgn0001308	2R	A	NTS8	HK2	-	Khc	19	4.32193	lhg_avg	8.14738	0.0659504	6.1372	0	No	NONE
FBtr0080183	FBgn0004363	2L	A	NTS8	HK2	-	porin	185	7.53916	lhg_avg	11.7576	0.0694777	9.63168	0	No	NONE
FBtr0085541	FBgn0020235	3R	A	NTS8	HK2	-	ATPsyn-gamma	56	5.83289	lhg_avg	11.9208	0.0875878	8.72444	0	No	NONE
FBtr0087670	FBgn0024556	2R	A	NTS8	HK2	+	EfTuM	34	5.12928	lhg_avg	9.10895	0.101949	6.72594	0	No	NONE
FBtr0080856	FBgn0024734	2L	A	NTS8	HK2	-	PRL-1	20	4.39232	lhg_avg	10.3417	0.102492	6.97038	0	No	NONE
FBtr0088090	FBgn0086712	2R	A	NTS8	HK2	-	Egm	10	3.45943	lhg_avg	7.29305	0.103776	5.30333	0	No	NONE
FBtr0085745	FBgn0010808	3R	A	NTS8	HK2	-	l(3)03670	17	4.16993	lhg_avg	9.97928	0.106823	6.11062	0	No	NONE
FBtr0087573	FBgn0261276	2R	A	NTS8	HK2	-	opa1-like	15	4	lhg_avg	9.64715	0.10685	7.10223	0	No	NONE
FBtr0089894	FBgn0038474	3R	A	NTS8	HK2	+	mRpS11	12	3.70044	lhg_avg	8.50557	0.110528	6.71448	0	No	NONE
FBtr0071641	FBgn0026369	2R	A	NTS8	HK2	+	Sara	4	2.32193	lhg_avg	8.01387	0.149767	5.36367	0	No	NONE
FBtr0080461	FBgn0051729	2L	A	NTS8	HK2	+	CG31729	15	4	lhg_avg	9.56712	0.158497	7.65158	0	No	NONE
FBtr0078739	FBgn0044823	3R	A	NTS8	HK2	-	Spec2	19	4.32193	lhg_avg	8.69109	0.171597	7.84223	0	No	NONE
FBtr0086795	FBgn0041585	2R	A	NTS8	HK2	+	olf186-F	8	3.16993	lhg_avg	8.72663	0.174373	5.40641	0	No	NONE
FBtr0088254	FBgn0053144	2R	A	NTS8	HK2	-	CG33144	61	5.9542	lhg_avg	7.98663	0.175436	5.89219	0	No	NONE
FBtr0077836	FBgn0031401	2L	A	NTS8	HK2	+	papi	88	6.47573	lhg_avg	9.8325	0.182456	9.43644	0	No	NONE
FBtr0080723	FBgn0000317	2L	A	NTS8	HK2	-	ck	1	1	lhg_avg	8.64489	0.191915	4.97908	0	No	NONE
FBtr0307521	FBgn0036576	3L	A	NTS8	HK2	-	CG5151	3	2	lhg_avg	9.0129	0.197733	5.42504	0	No	NONE
FBtr0334953	FBgn0037358	3R	A	NTS8	HK2	-	elm	62	5.97728	lhg_avg	11.1527	0.199124	7.86735	1	Yes	SAME
FBtr0083575	FBgn0024432	3R	A	NTS8	HK2	+	Dlc90F	144	7.17991	lmg_avg	10.1732	0.0630229	10.1292	1	Yes	DIFF
FBtr0329825	FBgn0028932	2L	A	NTS8	HK2	-	CG16890	20	4.39232	lmg_avg	6.6088	0.096069	6.19271	0	No	NONE
FBtr0083399	FBgn0086736	3R	A	NTS8	HK2	+	GckIII	75	6.24793	lmg_avg	7.91978	0.0965118	7.63122	0	No	NONE
FBtr0088362	FBgn0003660	2R	A	NTS8	HK2	-	Syb	85	6.42626	lmg_avg	10.9066	0.0987299	9.32003	0	No	NONE
FBtr0333619	FBgn0260635	3L	A	NTS8	HK2	-	th	39	5.32193	lmg_avg	10.6158	0.105983	8.57324	0	No	NONE
FBtr0078359	FBgn0037094	3L	A	NTS8	HK2	+	CG7611	5	2.58496	lmg_avg	10.2862	0.111276	6.83038	0	No	NONE
FBtr0082360	FBgn0037890	3R	A	NTS8	HK2	-	CG17734	13	3.80735	lmg_avg	11.25	0.11198	7.74712	0	No	NONE
FBtr0071532	FBgn0034577	2R	A	NTS8	HK2	+	cpa	44	5.49185	lmg_avg	10.216	0.113941	7.18934	0	No	NONE
FBtr0075813	FBgn0036376	3L	A	NTS8	HK2	+	Liprin-beta	15	4	lmg_avg	8.95957	0.121913	7.10983	0	No	NONE
FBtr0087054	FBgn0034172	2R	A	NTS8	HK2	+	CG6665	4	2.32193	lmg_avg	7.20554	0.122484	4.47629	0	No	NONE
FBtr0071563	FBgn0016984	2R	A	NTS8	HK2	-	sktl	10	3.45943	lmg_avg	7.41669	0.127121	6.01835	0	No	NONE
FBtr0085012	FBgn0039427	3R	A	NTS8	HK2	+	CG5447	4	2.32193	lmg_avg	8.42526	0.127225	6.0804	0	No	NONE
FBtr0082891	FBgn0038206	3R	A	NTS8	HK2	+	twf	45	5.52356	lmg_avg	9.48508	0.131768	8.33672	0	No	NONE
FBtr0078289	FBgn0026179	3L	A	NTS8	HK2	+	siz	9	3.32193	lmg_avg	9.80177	0.143453	6.06114	0	No	NONE
FBtr0081470	FBgn0032923	2L	A	NTS8	HK2	+	CG9248	37	5.24793	lmg_avg	8.94691	0.144784	7.70493	0	No	NONE
FBtr0079996	FBgn0051715	2L	A	NTS8	HK2	+	CG31715	63	6	lmg_avg	10.1797	0.150173	8.13874	1	Yes	DIFF
FBtr0088784	FBgn0033266	2R	A	NTS8	HK2	+	Socs44A	7	3	lmg_avg	8.42427	0.154235	5.41982	0	No	NONE
FBtr0087268	FBgn0034057	2R	A	NTS8	HK2	-	CG8314	8	3.16993	lmg_avg	8.32305	0.155355	5.45781	0	No	NONE
FBtr0078997	FBgn0031662	2L	A	NTS8	HK2	+	CG3792	21	4.45943	lmg_avg	9.46795	0.158687	6.73143	0	No	NONE
FBtr0089867	FBgn0035028	2R	A	NTS8	HK2	+	Start1	5	2.58496	lmg_avg	8.91736	0.162163	5.70081	0	No	NONE
FBtr0305003	FBgn0044826	3R	A	NTS8	HK2	-	Pak3	7	3	lmg_avg	9.37615	0.163097	6.72306	0	No	NONE
FBtr0331447	FBgn0022153	2L	A	NTS8	HK2	+	l(2)k05819	5	2.58496	lmg_avg	8.06212	0.172306	5.96414	1	Yes	SAME
FBtr0081356	FBgn0015803	2L	A	NTS8	HK2	+	RtGEF	2	1.58496	lmg_avg	7.8801	0.174839	4.57738	0	No	NONE
FBtr0076413	FBgn0040475	3L	A	NTS8	HK2	-	SH3PX1	12	3.70044	lmg_avg	8.67515	0.178699	6.00484	0	No	NONE
FBtr0089146	FBgn0039890	4	A	NTS8	HK2	-	CG2316	2	1.58496	lmg_avg	10.54	0.180974	6.47583	0	No	NONE
FBtr0078087	FBgn0015924	2L	A	NTS8	HK2	-	crq	10	3.45943	lmg_avg	9.75172	0.189505	6.17112	0	No	NONE
FBtr0073235	FBgn0041630	3L	A	NTS8	HK2	+	Hexo1	5	2.58496	lmg_avg	11.3492	0.190695	5.47793	0	No	NONE
FBtr0077822	FBgn0003557	2L	A	NTS8	HK2	+	Su(dx)	9	3.32193	lmg_avg	9.11453	0.197151	4.80816	0	No	NONE
FBtr0301735	FBgn0033945	2R	A	NTS8	HK2	-	CG12868	13	3.80735	lmg_avg	8.80389	0.199978	6.12074	0	No	NONE
FBtr0083057	FBgn0001219	3R	A	NTS8	HK2	+	Hsc70-4	990	9.95274	lsg_avg	12.6822	0.0437627	11.1989	1	Yes	SAME
FBtr0075410	FBgn0027080	3L	A	NTS8	HK2	-	Aats-tyr	33	5.08746	lsg_avg	8.52195	0.0553208	6.4324	0	No	NONE
FBtr0083572	FBgn0026250	3R	A	NTS8	HK2	+	eIF-1A	337	8.40088	lsg_avg	11.6302	0.0611907	10.7542	0	No	NONE
FBtr0071592	FBgn0016726	2R	A	NTS8	HK2	+	RpL29	396	8.633	lsg_avg	12.7059	0.062974	9.71937	0	No	NONE
FBtr0075092	FBgn0036805	3L	A	NTS8	HK2	-	Chmp1	71	6.16993	lsg_avg	8.90259	0.0693591	7.44836	0	No	NONE
FBtr0071771	FBgn0034708	2R	A	NTS8	HK2	+	Vps35	15	4	lsg_avg	8.94367	0.0700463	6.59476	0	No	NONE
FBtr0076488	FBgn0015218	3L	A	NTS8	HK2	-	eIF-4E	201	7.65821	lsg_avg	10.8417	0.0763498	9.66884	0	No	NONE
FBtr0332947	FBgn0028737	2R	A	NTS8	HK2	+	Ef1beta	192	7.59246	lsg_avg	12.5737	0.0774659	9.6488	0	No	NONE
FBtr0072477	FBgn0027786	3L	A	NTS8	HK2	+	Mtch	52	5.72792	lsg_avg	10.1243	0.0782455	9.53237	0	No	NONE
FBtr0084576	FBgn0039160	3R	A	NTS8	HK2	-	CG5510	39	5.32193	lsg_avg	8.81602	0.0783939	8.53418	0	No	NONE
FBtr0072188	FBgn0011726	2R	A	NTS8	HK2	-	tsr	275	8.10852	lsg_avg	12.6193	0.0784974	10.5717	0	No	NONE
FBtr0073142	FBgn0052267	3L	A	NTS8	HK2	-	CG32267	115	6.85798	lsg_avg	10.688	0.0839463	10.2205	0	No	NONE
FBtr0077718	FBgn0031459	2L	A	NTS8	HK2	+	CG2862	32	5.04439	lsg_avg	10.5776	0.087998	8.8779	1	Yes	SAME
FBtr0072033	FBgn0040660	2R	A	NTS8	HK2	-	CG13551	203	7.67243	lsg_avg	12.1312	0.0881579	9.98696	0	No	NONE
FBtr0081639	FBgn0003884	3R	A	NTS8	HK2	+	alphaTub84B	1828	10.8368	lsg_avg	12.6493	0.0889788	11.5238	0	No	NONE
FBtr0332873	FBgn0001233	3L	A	NTS8	HK2	+	Hsp83	1193	10.2216	lsg_avg	12.3528	0.0891105	11.2954	1	Yes	SAME
FBtr0085355	FBgn0039601	3R	A	NTS8	HK2	-	CG1523	11	3.58496	lsg_avg	7.68103	0.0918957	6.05781	0	No	NONE
FBtr0085392	FBgn0029176	3R	A	NTS8	HK2	+	Ef1gamma	152	7.25739	lsg_avg	12.6643	0.0929415	9.10736	0	No	NONE
FBtr0088428	FBgn0033482	2R	A	NTS8	HK2	-	CG1371	13	3.80735	lsg_avg	9.03356	0.0980063	7.52395	0	No	NONE
FBtr0081921	FBgn0037638	3R	A	NTS8	HK2	+	CG8379	31	5	lsg_avg	8.11517	0.0980155	8.07766	1	Yes	SAME
FBtr0075756	FBgn0001108	3L	A	NTS8	HK2	+	Gl	20	4.39232	lsg_avg	7.9391	0.0982279	6.71685	0	No	NONE
FBtr0083803	FBgn0038723	3R	A	NTS8	HK2	-	CG6195	64	6.02237	lsg_avg	8.04265	0.0987392	6.95553	0	No	NONE
FBtr0085903	FBgn0032961	2L	A	NTS8	HK2	+	CG1416	94	6.56986	lsg_avg	10.0426	0.0992999	8.53282	0	No	NONE
FBtr0084748	FBgn0039252	3R	A	NTS8	HK2	+	CG11771	46	5.55459	lsg_avg	8.57489	0.0993859	6.9059	0	No	NONE
FBtr0088641	FBgn0021825	2R	A	NTS8	HK2	+	Dmn	55	5.80735	lsg_avg	9.37099	0.10008	7.32149	0	No	NONE
FBtr0339146	FBgn0000150	3R	A	NTS8	HK2	-	awd	569	9.15482	lsg_avg	12.2973	0.101778	9.49596	0	No	NONE
FBtr0111291	FBgn0040005	2R	A	NTS8	HK2	+	CG17883	6	2.80735	lsg_avg	9.71774	0.10424	7.23268	0	No	NONE
FBtr0303217	FBgn0035195	3L	A	NTS8	HK2	+	Sac1	55	5.80735	lsg_avg	9.3878	0.104254	8.85702	0	No	NONE
FBtr0078892	FBgn0037270	3R	A	NTS8	HK2	-	CG9769	68	6.10852	lsg_avg	11.0428	0.104319	6.8646	0	No	NONE
FBtr0088953	FBgn0004132	2R	A	NTS8	HK2	-	boca	22	4.52356	lsg_avg	8.6712	0.104835	5.06724	0	No	NONE
FBtr0079236	FBgn0000308	2L	A	NTS8	HK2	-	chic	110	6.79442	lsg_avg	11.7554	0.109828	9.49477	0	No	NONE
FBtr0087059	FBgn0034176	2R	A	NTS8	HK2	-	ste24a	63	6	lsg_avg	9.35679	0.1105	8.97292	0	No	NONE
FBtr0075818	FBgn0086785	3L	A	NTS8	HK2	-	Vps36	21	4.45943	lsg_avg	7.12166	0.110611	6.00195	0	No	NONE
FBtr0079129	FBgn0031710	2L	A	NTS8	HK2	-	CG7371	18	4.24793	lsg_avg	6.80407	0.110622	5.62341	1	Yes	DIFF
FBtr0299906	FBgn0010348	3L	A	NTS8	HK2	-	Arf79F	63	6	lsg_avg	11.9248	0.110933	8.80512	0	No	NONE
FBtr0079039	FBgn0053113	2L	A	NTS8	HK2	-	Rtnl1	114	6.84549	lsg_avg	12.0212	0.111321	7.21215	0	No	NONE
FBtr0332708	FBgn0010741	3L	A	NTS8	HK2	-	l(3)01239	34	5.12928	lsg_avg	9.86949	0.11158	7.35874	0	No	NONE
FBtr0086127	FBgn0027066	2R	A	NTS8	HK2	+	Eb1	76	6.26679	lsg_avg	10.6218	0.111674	8.4266	0	No	NONE
FBtr0082652	FBgn0011745	3R	A	NTS8	HK2	+	Arp1	41	5.39232	lsg_avg	10.7488	0.111771	7.94527	0	No	NONE
FBtr0075559	FBgn0087035	3L	A	NTS8	HK2	+	AGO2	30	4.9542	lsg_avg	10.8161	0.113431	8.08953	0	No	NONE
FBtr0075358	FBgn0017572	3L	A	NTS8	HK2	-	Mo25	25	4.70044	lsg_avg	9.40891	0.114401	5.89784	0	No	NONE
FBtr0309836	FBgn0026259	3L	A	NTS8	HK2	-	eIF5B	133	7.06609	lsg_avg	9.78737	0.114891	9.49659	0	No	NONE
FBtr0075968	FBgn0004926	3L	A	NTS8	HK2	-	eIF-2beta	184	7.53138	lsg_avg	10.8826	0.116325	9.01946	0	No	NONE
FBtr0333598	FBgn0036566	3L	A	NTS8	HK2	+	ClC-c	6	2.80735	lsg_avg	10.0335	0.116508	6.23686	0	No	NONE
FBtr0332882	FBgn0002069	2R	A	NTS8	HK2	+	Aats-asp	10	3.45943	lsg_avg	10.8801	0.11659	7.28403	0	No	NONE
FBtr0078624	FBgn0037374	3R	A	NTS8	HK2	+	jagn	23	4.58496	lsg_avg	9.86915	0.11715	6.50757	0	No	NONE
FBtr0075565	FBgn0036515	3L	A	NTS8	HK2	+	CG12304	90	6.50779	lsg_avg	9.70518	0.117217	8.12066	0	No	NONE
FBtr0331868	FBgn0010333	3L	A	NTS8	HK2	-	Rac1	48	5.61471	lsg_avg	9.76066	0.117243	7.00667	0	No	NONE
FBtr0072152	FBgn0003008	2R	A	NTS8	HK2	+	or	20	4.39232	lsg_avg	8.75973	0.119373	7.12408	0	No	NONE
FBtr0073270	FBgn0035499	3L	A	NTS8	HK2	-	Chd64	95	6.58496	lsg_avg	12.1286	0.119955	8.93748	0	No	NONE
FBtr0305683	FBgn0032640	2L	A	NTS8	HK2	+	Sgt	404	8.66178	lsg_avg	10.0763	0.119999	9.87558	0	No	NONE
FBtr0082584	FBgn0038039	3R	A	NTS8	HK2	+	CG5196	8	3.16993	lsg_avg	8.27067	0.120811	5.59608	0	No	NONE
FBtr0079951	FBgn0032198	2L	A	NTS8	HK2	+	eEF1delta	91	6.52356	lsg_avg	11.3185	0.120859	9.12643	0	No	NONE
FBtr0110839	FBgn0083961	2L	A	NTS8	HK2	+	CG34125	14	3.90689	lsg_avg	8.84648	0.120984	6.62552	0	No	NONE
FBtr0301715	FBgn0022787	3R	A	NTS8	HK2	+	Hel89B	13	3.80735	lsg_avg	8.32682	0.121265	7.20134	0	No	NONE
FBtr0085941	FBgn0025674	2L	A	NTS8	HK2	-	CycK	34	5.12928	lsg_avg	8.12576	0.121444	6.58398	0	No	NONE
FBtr0334758	FBgn0031376	2L	A	NTS8	HK2	+	Der-1	138	7.11894	lsg_avg	10.796	0.12175	9.98244	0	No	NONE
FBtr0077112	FBgn0035639	3L	A	NTS8	HK2	+	CG5537	18	4.24793	lsg_avg	9.56886	0.121933	6.82178	0	No	NONE
FBtr0331818	FBgn0036974	3L	A	NTS8	HK2	+	eRF1	100	6.65821	lsg_avg	10.6112	0.122541	9.97706	0	No	NONE
FBtr0087887	FBgn0022764	2R	A	NTS8	HK2	-	Sin3A	3	2	lsg_avg	8.99393	0.122875	5.64204	0	No	NONE
FBtr0082172	FBgn0027524	3R	A	NTS8	HK2	+	CG3909	34	5.12928	lsg_avg	8.50099	0.123052	7.85612	0	No	NONE
FBtr0082925	FBgn0004855	3R	A	NTS8	HK2	+	RpII15	35	5.16993	lsg_avg	9.19315	0.123384	6.72991	1	Yes	DIFF
FBtr0100410	FBgn0001149	3R	A	NTS8	HK2	-	GstD1	193	7.59991	lsg_avg	13.0387	0.126458	10.8787	0	No	NONE
FBtr0085320	FBgn0026400	3R	A	NTS8	HK2	-	Noa36	181	7.50779	lsg_avg	9.39301	0.128721	8.87924	0	No	NONE
FBtr0087643	FBgn0033879	2R	A	NTS8	HK2	-	CG6543	50	5.67243	lsg_avg	10.9918	0.129152	7.38224	0	No	NONE
FBtr0083010	FBgn0004597	3R	A	NTS8	HK2	-	CycC	4	2.32193	lsg_avg	7.66243	0.130542	5.80226	0	No	NONE
FBtr0078944	FBgn0037249	3R	A	NTS8	HK2	-	eIF3-S10	109	6.78136	lsg_avg	10.5423	0.130746	8.27625	0	No	NONE
FBtr0079200	FBgn0031781	2L	A	NTS8	HK2	+	Arpc4	46	5.55459	lsg_avg	10.2984	0.130753	6.73934	0	No	NONE
FBtr0077180	FBgn0035590	3L	A	NTS8	HK2	-	CG10673	15	4	lsg_avg	7.34487	0.131269	5.24372	0	No	NONE
FBtr0078774	FBgn0037297	3R	A	NTS8	HK2	+	CG1116	36	5.20945	lsg_avg	8.01805	0.131378	6.72554	1	Yes	DIFF
FBtr0089622	FBgn0040227	3R	A	NTS8	HK2	+	eIF-3p66	36	5.20945	lsg_avg	11.5817	0.131588	7.53987	0	No	NONE
FBtr0089243	FBgn0023213	4	A	NTS8	HK2	-	eIF4G	7	3	lsg_avg	11.4583	0.132142	7.34218	0	No	NONE
FBtr0073245	FBgn0041171	3L	A	NTS8	HK2	-	ago	34	5.12928	lsg_avg	9.10301	0.133213	8.38274	0	No	NONE
FBtr0085552	FBgn0016685	3R	A	NTS8	HK2	+	Nlp	187	7.55459	lsg_avg	11.3416	0.133431	8.63554	0	No	NONE
FBtr0080460	FBgn0032499	2L	A	NTS8	HK2	+	Uvrag	12	3.70044	lsg_avg	7.66061	0.136838	5.9193	0	No	NONE
FBtr0084236	FBgn0038951	3R	A	NTS8	HK2	-	CG5380	13	3.80735	lsg_avg	6.43897	0.137152	5.60814	0	No	NONE
FBtr0078485	FBgn0037150	3L	A	NTS8	HK2	-	CG7133	4	2.32193	lsg_avg	8.04646	0.138083	4.89618	0	No	NONE
FBtr0084866	FBgn0027090	3R	A	NTS8	HK2	-	Aats-gln	17	4.16993	lsg_avg	8.79092	0.139669	5.87014	0	No	NONE
FBtr0088155	FBgn0033624	2R	A	NTS8	HK2	-	CG12384	202	7.66534	lsg_avg	11.4895	0.140077	7.60732	1	Yes	SAME
FBtr0087498	FBgn0010638	2R	A	NTS8	HK2	+	Sec61beta	154	7.27612	lsg_avg	12.4544	0.14133	9.93045	0	No	NONE
FBtr0079774	FBgn0032101	2L	A	NTS8	HK2	-	CG9586	83	6.39232	lsg_avg	8.86746	0.141942	7.48038	1	Yes	SAME
FBtr0335127	FBgn0031458	2L	A	NTS8	HK2	+	aph-1	18	4.24793	lsg_avg	8.28735	0.142448	6.83517	0	No	NONE
FBtr0080062	FBgn0032215	2L	A	NTS8	HK2	-	CG5385	26	4.75489	lsg_avg	9.1652	0.143087	7.54256	0	No	NONE
FBtr0079267	FBgn0031818	2L	A	NTS8	HK2	-	CG9536	17	4.16993	lsg_avg	9.22044	0.143291	7.36962	0	No	NONE
FBtr0081285	FBgn0032790	2L	A	NTS8	HK2	-	CG10194	2	1.58496	lsg_avg	7.82598	0.143377	4.2575	0	No	NONE
FBtr0309242	FBgn0022343	2R	A	NTS8	HK2	+	CG3760	112	6.82018	lsg_avg	10.1505	0.145245	8.3732	0	No	NONE
FBtr0114521	FBgn0050051	2R	A	NTS8	HK2	+	CG30051	62	5.97728	lsg_avg	8.54497	0.149244	8.23967	1	Yes	SAME
FBtr0079191	FBgn0031776	2L	A	NTS8	HK2	+	CG13993	162	7.34873	lsg_avg	9.31601	0.149911	8.44562	0	No	NONE
FBtr0321255	FBgn0028475	3R	A	NTS8	HK2	-	Hrd3	110	6.79442	lsg_avg	9.20547	0.15143	9.14499	0	No	NONE
FBtr0076750	FBgn0035827	3L	A	NTS8	HK2	+	Srp9	35	5.16993	lsg_avg	9.355	0.152791	6.78171	0	No	NONE
FBtr0086627	FBgn0034401	2R	A	NTS8	HK2	-	CG15100	41	5.39232	lsg_avg	9.50327	0.154205	8.85745	0	No	NONE
FBtr0336961	FBgn0031633	2L	A	NTS8	HK2	-	CG2976	74	6.22882	lsg_avg	9.4093	0.154375	7.79065	0	No	NONE
FBtr0088676	FBgn0033351	2R	A	NTS8	HK2	-	CG8235	35	5.16993	lsg_avg	9.12362	0.155034	6.33975	0	No	NONE
FBtr0072984	FBgn0052484	3L	A	NTS8	HK2	+	Sk2	12	3.70044	lsg_avg	8.7612	0.155084	6.94688	0	No	NONE
FBtr0084644	FBgn0039204	3R	A	NTS8	HK2	+	CG6607	21	4.45943	lsg_avg	7.91611	0.155386	6.01989	0	No	NONE
FBtr0080430	FBgn0032465	2L	A	NTS8	HK2	-	CG12404	23	4.58496	lsg_avg	9.57513	0.156351	7.94512	0	No	NONE
FBtr0088153	FBgn0021795	2R	A	NTS8	HK2	-	Tapdelta	90	6.50779	lsg_avg	11.6925	0.156471	8.5028	0	No	NONE
FBtr0343116	FBgn0032704	2L	A	NTS8	HK2	-	Jwa	38	5.2854	lsg_avg	11.217	0.156584	7.20891	0	No	NONE
FBtr0330113	FBgn0039875	3R	A	NTS8	HK2	+	sip3	60	5.93074	lsg_avg	9.6341	0.157503	9.50529	1	Yes	SAME
FBtr0086773	FBgn0027836	2R	A	NTS8	HK2	-	Dgp-1	72	6.18982	lsg_avg	9.42981	0.157624	6.93781	0	No	NONE
FBtr0072013	FBgn0034858	2R	A	NTS8	HK2	+	eIF2B-delta	26	4.75489	lsg_avg	8.27969	0.158666	6.35464	1	Yes	DIFF
FBtr0078426	FBgn0052446	3L	A	NTS8	HK2	+	Atox1	35	5.16993	lsg_avg	11.5323	0.158756	7.93484	0	No	NONE
FBtr0087774	FBgn0020370	2R	A	NTS8	HK2	-	TppII	25	4.70044	lsg_avg	10.7713	0.158801	7.84117	0	No	NONE
FBtr0072095	FBgn0011297	2R	A	NTS8	HK2	-	l(2)not	17	4.16993	lsg_avg	7.45675	0.158853	5.71874	0	No	NONE
FBtr0082654	FBgn0016693	3R	A	NTS8	HK2	+	Past1	205	7.6865	lsg_avg	10.1612	0.159052	9.93459	0	No	NONE
FBtr0080537	FBgn0028538	2L	A	NTS8	HK2	+	Sec71	26	4.75489	lsg_avg	9.34676	0.159514	6.97932	0	No	NONE
FBtr0079295	FBgn0031842	2L	A	NTS8	HK2	+	Tango1	27	4.80735	lsg_avg	10.4261	0.160195	8.2	0	No	NONE
FBtr0087016	FBgn0034181	2R	A	NTS8	HK2	-	CG8963	72	6.18982	lsg_avg	11.3027	0.162514	9.17101	0	No	NONE
FBtr0086531	FBgn0040273	2R	A	NTS8	HK2	+	Spt5	10	3.45943	lsg_avg	8.73367	0.162551	6.24988	0	No	NONE
FBtr0303381	FBgn0052428	3L	A	NTS8	HK2	-	CG32428	4	2.32193	lsg_avg	8.99238	0.163043	6.23552	0	No	NONE
FBtr0083661	FBgn0044871	3R	A	NTS8	HK2	+	Gos28	10	3.45943	lsg_avg	9.0579	0.16317	6.99294	0	No	NONE
FBtr0084814	FBgn0039303	3R	A	NTS8	HK2	+	CG11857	36	5.20945	lsg_avg	11.2072	0.164027	8.38032	1	Yes	SAME
FBtr0077956	FBgn0031304	2L	A	NTS8	HK2	+	CG4552	79	6.32193	lsg_avg	9.21841	0.164044	8.41701	0	No	NONE
FBtr0079266	FBgn0086357	2L	A	NTS8	HK2	-	Sec61alpha	28	4.85798	lsg_avg	11.8077	0.164881	8.39689	0	No	NONE
FBtr0078919	FBgn0037241	3R	A	NTS8	HK2	+	CG14646	7	3	lsg_avg	8.8912	0.164959	5.83074	0	No	NONE
FBtr0332459	FBgn0024947	2L	A	NTS8	HK2	-	NTPase	8	3.16993	lsg_avg	12.5533	0.165122	7.86375	0	No	NONE
FBtr0078498	FBgn0027086	3L	A	NTS8	HK2	+	Aats-ile	7	3	lsg_avg	9.97864	0.165591	6.76093	1	Yes	SAME
FBtr0073114	FBgn0035402	3L	A	NTS8	HK2	-	CG12082	34	5.12928	lsg_avg	8.82236	0.167722	7.28834	0	No	NONE
FBtr0088011	FBgn0033691	2R	A	NTS8	HK2	-	CG8860	222	7.8009	lsg_avg	12.3095	0.167947	8.81735	0	No	NONE
FBtr0080047	FBgn0032242	2L	A	NTS8	HK2	-	CG5355	62	5.97728	lsg_avg	9.52223	0.16831	8.25365	0	No	NONE
FBtr0078552	FBgn0037200	3L	A	NTS8	HK2	+	CG11109	8	3.16993	lsg_avg	7.53522	0.16843	3.85946	0	No	NONE
FBtr0072583	FBgn0035165	3L	A	NTS8	HK2	+	CG13887	111	6.80735	lsg_avg	12.0986	0.168789	8.60857	0	No	NONE
FBtr0084801	FBgn0020626	3R	A	NTS8	HK2	-	Osbp	44	5.49185	lsg_avg	10.4603	0.168951	7.82171	0	No	NONE
FBtr0333089	FBgn0020443	2L	A	NTS8	HK2	+	Elf	41	5.39232	lsg_avg	11.3813	0.169107	8.71469	0	No	NONE
FBtr0084511	FBgn0005674	3R	A	NTS8	HK2	-	Aats-glupro	7	3	lsg_avg	10.2178	0.170398	6.78216	0	No	NONE
FBtr0083172	FBgn0038360	3R	A	NTS8	HK2	+	CG9590	56	5.83289	lsg_avg	9.70665	0.170759	7.84652	0	No	NONE
FBtr0301229	FBgn0031985	2L	A	NTS8	HK2	-	mon2	10	3.45943	lsg_avg	9.29741	0.171696	6.95377	0	No	NONE
FBtr0085199	FBgn0039531	3R	A	NTS8	HK2	-	CG5611	3	2	lsg_avg	6.06309	0.171963	3.74891	0	No	NONE
FBtr0075517	FBgn0000115	3L	A	NTS8	HK2	+	Arl1	93	6.55459	lsg_avg	10.3387	0.172206	7.24764	0	No	NONE
FBtr0081719	FBgn0010282	3R	A	NTS8	HK2	+	TfIIFalpha	116	6.87036	lsg_avg	8.9452	0.172518	7.48757	0	No	NONE
FBtr0332578	FBgn0086443	2L	A	NTS8	HK2	-	Aats-asn	23	4.58496	lsg_avg	10.0337	0.173323	7.15113	0	No	NONE
FBtr0080532	FBgn0028541	2L	A	NTS8	HK2	+	TM9SF4	30	4.9542	lsg_avg	10.8313	0.173516	8.2649	0	No	NONE
FBtr0080228	FBgn0027582	2L	A	NTS8	HK2	-	CG6230	85	6.42626	lsg_avg	9.78073	0.174911	8.66974	0	No	NONE
FBtr0080331	FBgn0027081	2L	A	NTS8	HK2	+	Aats-thr	40	5.35755	lsg_avg	10.0402	0.176524	7.21166	1	Yes	SAME
FBtr0077160	FBgn0016031	3L	A	NTS8	HK2	-	lama	7	3	lsg_avg	9.61634	0.176651	6.10387	1	Yes	DIFF
FBtr0087734	FBgn0027079	2R	A	NTS8	HK2	+	Aats-val	10	3.45943	lsg_avg	8.21272	0.176828	5.11627	0	No	NONE
FBtr0076517	FBgn0035947	3L	A	NTS8	HK2	+	Srp68	22	4.52356	lsg_avg	10.5	0.176912	7.4551	0	No	NONE
FBtr0083226	FBgn0010379	3R	A	NTS8	HK2	+	Akt1	12	3.70044	lsg_avg	9.53527	0.177033	5.17992	0	No	NONE
FBtr0079750	FBgn0032059	2L	A	NTS8	HK2	-	PrBP	15	4	lsg_avg	8.83468	0.177169	7.39785	0	No	NONE
FBtr0332505	FBgn0032160	2L	A	NTS8	HK2	+	CG4598	22	4.52356	lsg_avg	10.1797	0.177383	5.43051	0	No	NONE
FBtr0079900	FBgn0025700	2L	A	NTS8	HK2	-	CG5885	111	6.80735	lsg_avg	12.0598	0.177853	9.80985	1	Yes	DIFF
FBtr0087702	FBgn0000119	2R	A	NTS8	HK2	-	arr	8	3.16993	lsg_avg	8.20226	0.178194	4.92106	0	No	NONE
FBtr0083374	FBgn0038464	3R	A	NTS8	HK2	-	CG16941	15	4	lsg_avg	5.8655	0.17966	4.42735	0	No	NONE
FBtr0075339	FBgn0036667	3L	A	NTS8	HK2	-	CG9669	4	2.32193	lsg_avg	11.067	0.179974	7.10616	0	No	NONE
FBtr0083945	FBgn0014029	3R	A	NTS8	HK2	-	40057	23	4.58496	lsg_avg	10.78	0.181053	7.42075	0	No	NONE
FBtr0078926	FBgn0037252	3R	A	NTS8	HK2	+	CG14650	31	5	lsg_avg	8.97315	0.181203	7.44079	0	No	NONE
FBtr0085158	FBgn0039505	3R	A	NTS8	HK2	+	CG5934	20	4.39232	lsg_avg	8.57287	0.181419	7.46783	0	No	NONE
FBtr0077978	FBgn0031320	2L	A	NTS8	HK2	-	CG5126	6	2.80735	lsg_avg	8.16483	0.182726	4.10121	0	No	NONE
FBtr0072727	FBgn0035206	3L	A	NTS8	HK2	-	CG9186	8	3.16993	lsg_avg	10.5193	0.182988	6.37048	0	No	NONE
FBtr0078943	FBgn0037251	3R	A	NTS8	HK2	-	CG9804	8	3.16993	lsg_avg	8.47309	0.183162	5.93975	0	No	NONE
FBtr0088652	FBgn0033349	2R	A	NTS8	HK2	+	CG8243	37	5.24793	lsg_avg	10.1801	0.183593	7.24334	0	No	NONE
FBtr0084808	FBgn0039293	3R	A	NTS8	HK2	+	CG11851	2	1.58496	lsg_avg	9.06542	0.184402	5.63087	0	No	NONE
FBtr0100673	FBgn0010704	2L	A	NTS8	HK2	+	l(2)s5379	57	5.85798	lsg_avg	11.3988	0.184811	8.05396	0	No	NONE
FBtr0075076	FBgn0036824	3L	A	NTS8	HK2	-	CG3902	5	2.58496	lsg_avg	11.1439	0.185049	3.48891	0	No	NONE
FBtr0081143	FBgn0002022	2L	A	NTS8	HK2	+	Catsup	39	5.32193	lsg_avg	11.0129	0.18538	8.19649	1	Yes	SAME
FBtr0083117	FBgn0019925	3R	A	NTS8	HK2	-	Surf4	47	5.58496	lsg_avg	11.7643	0.186042	7.23519	0	No	NONE
FBtr0075025	FBgn0036843	3L	A	NTS8	HK2	+	CG6812	3	2	lsg_avg	10.1813	0.187804	5.58635	0	No	NONE
FBtr0273271	FBgn0038808	3R	A	NTS8	HK2	+	Srp14	22	4.52356	lsg_avg	10.165	0.188225	8.31562	0	No	NONE
FBtr0072411	FBgn0035083	2R	A	NTS8	HK2	-	Tina-1	53	5.75489	lsg_avg	11.1039	0.188271	6.31705	0	No	NONE
FBtr0085164	FBgn0015737	3R	A	NTS8	HK2	+	Hmu	77	6.2854	lsg_avg	11.4261	0.188493	6.58066	0	No	NONE
FBtr0084273	FBgn0020278	3R	A	NTS8	HK2	-	loco	4	2.32193	lsg_avg	9.33251	0.188843	6.53368	0	No	NONE
FBtr0078060	FBgn0031256	2L	A	NTS8	HK2	+	CG4164	62	5.97728	lsg_avg	10.3697	0.190986	7.45215	0	No	NONE
FBtr0091612	FBgn0053635	2L	A	NTS8	HK2	-	CG33635	4	2.32193	lsg_avg	8.25212	0.19201	4.99133	0	No	NONE
FBtr0077562	FBgn0053123	2L	A	NTS8	HK2	-	CG33123	7	3	lsg_avg	9.05365	0.192268	6.06268	0	No	NONE
FBtr0331966	FBgn0050497	2R	A	NTS8	HK2	-	CG30497	122	6.94251	lsg_avg	10.9795	0.192323	6.17804	0	No	NONE
FBtr0088360	FBgn0028426	2R	A	NTS8	HK2	-	JhI-1	3	2	lsg_avg	6.35257	0.1926	1.91943	0	No	NONE
FBtr0084933	FBgn0039357	3R	A	NTS8	HK2	-	CG4743	7	3	lsg_avg	7.67068	0.193228	6.04619	0	No	NONE
FBtr0084670	FBgn0039212	3R	A	NTS8	HK2	-	Syx18	75	6.24793	lsg_avg	9.15181	0.194371	8.6234	0	No	NONE
FBtr0334317	FBgn0037603	3R	A	NTS8	HK2	+	CG11753	21	4.45943	lsg_avg	9.48048	0.196008	5.79668	0	No	NONE
FBtr0084647	FBgn0039208	3R	A	NTS8	HK2	+	Esyt2	14	3.90689	lsg_avg	10.4493	0.196852	8.14726	0	No	NONE
FBtr0332107	FBgn0035121	3L	A	NTS8	HK2	-	Tudor-SN	46	5.55459	lsg_avg	11.5524	0.196906	8.086	0	No	NONE
FBtr0075453	FBgn0011016	3L	A	NTS8	HK2	+	SsRbeta	108	6.76818	lsg_avg	11.6937	0.197526	8.61375	0	No	NONE
FBtr0088730	FBgn0033309	2R	A	NTS8	HK2	-	CG8735	78	6.30378	lsg_avg	8.96668	0.198077	8.52382	0	No	NONE
FBtr0078391	FBgn0015239	3L	A	NTS8	HK2	-	Hr78	10	3.45943	lsg_avg	10.0936	0.199863	6.75762	0	No	NONE
FBtr0086515	FBgn0013954	2R	A	NTS8	HK2	+	FK506-bp2	901	9.81698	ltr_avg	11.7481	0.0565371	9.9085	0	No	NONE
FBtr0071902	FBgn0034793	2R	A	NTS8	HK2	+	asrij	66	6.06609	ltr_avg	7.66503	0.0687631	7.42221	1	Yes	DIFF
FBtr0079866	FBgn0025117	2L	A	NTS8	HK2	+	und	167	7.39232	ltr_avg	10.667	0.0705134	10.3347	1	Yes	SAME
FBtr0085247	FBgn0039555	3R	A	NTS8	HK2	+	mRpS22	68	6.10852	ltr_avg	8.16756	0.075503	7.37762	0	No	NONE
FBtr0339990	FBgn0033934	2R	A	NTS8	HK2	-	CG17385	46	5.55459	ltr_avg	8.99423	0.0765451	7.53532	0	No	NONE
FBtr0083566	FBgn0020238	3R	A	NTS8	HK2	+	14-3-3epsilon	786	9.62022	ltr_avg	12.0766	0.0769253	10.6286	0	No	NONE
FBtr0088899	FBgn0033225	2R	A	NTS8	HK2	-	CG1550	9	3.32193	ltr_avg	7.48211	0.0774651	5.24167	0	No	NONE
FBtr0086920	FBgn0024196	2R	A	NTS8	HK2	+	robl	112	6.82018	ltr_avg	10.2128	0.0797581	9.12042	0	No	NONE
FBtr0072163	FBgn0022708	2R	A	NTS8	HK2	+	Adk2	45	5.52356	ltr_avg	10.7696	0.0842915	7.47048	0	No	NONE
FBtr0332719	FBgn0036928	3L	A	NTS8	HK2	+	Tom20	184	7.53138	ltr_avg	10.3035	0.0886406	9.96708	0	No	NONE
FBtr0080834	FBgn0014092	2L	A	NTS8	HK2	+	CG4278	8	3.16993	ltr_avg	8.75374	0.0957957	6.77467	0	No	NONE
FBtr0088565	FBgn0033376	2R	A	NTS8	HK2	+	CG8777	2	1.58496	ltr_avg	7.05189	0.0978396	4.76636	0	No	NONE
FBtr0080693	FBgn0040228	2L	A	NTS8	HK2	+	dyn-p25	5	2.58496	ltr_avg	7.95545	0.099413	6.60334	0	No	NONE
FBtr0078441	FBgn0037135	3L	A	NTS8	HK2	+	CG7414	252	7.98299	ltr_avg	11.1785	0.0995321	10.6734	0	No	NONE
FBtr0111232	FBgn0058439	2L	A	NTS8	HK2	-	CG40439	4	2.32193	ltr_avg	8.94742	0.100062	6.67071	0	No	NONE
FBtr0078116	FBgn0031224	2L	A	NTS8	HK2	+	CG11454	11	3.58496	ltr_avg	8.03187	0.101901	5.50632	0	No	NONE
FBtr0072219	FBgn0015268	2R	A	NTS8	HK2	-	Nap1	117	6.88264	ltr_avg	11.1877	0.104141	7.8447	0	No	NONE
FBtr0082115	FBgn0037708	3R	A	NTS8	HK2	-	CG9386	2	1.58496	ltr_avg	6.64044	0.106477	3.44984	0	No	NONE
FBtr0081157	FBgn0086446	2L	A	NTS8	HK2	+	l(2)37Ce	11	3.58496	ltr_avg	7.98876	0.107124	6.95479	0	No	NONE
FBtr0084972	FBgn0039406	3R	A	NTS8	HK2	-	RpL34a	121	6.93074	ltr_avg	11.3243	0.108496	7.39186	0	No	NONE
FBtr0086951	FBgn0034231	2R	A	NTS8	HK2	-	APC10	18	4.24793	ltr_avg	6.99995	0.113063	5.50705	0	No	NONE
FBtr0301486	FBgn0038976	3R	A	NTS8	HK2	+	CG7048	227	7.83289	ltr_avg	9.6941	0.113317	9.3575	1	Yes	SAME
FBtr0089013	FBgn0033162	2R	A	NTS8	HK2	-	CG1707	28	4.85798	ltr_avg	11.1133	0.11365	6.76559	0	No	NONE
FBtr0082849	FBgn0038166	3R	A	NTS8	HK2	-	CG9588	24	4.64386	ltr_avg	7.85662	0.115725	5.98176	0	No	NONE
FBtr0310411	FBgn0037543	3R	A	NTS8	HK2	+	CG10903	8	3.16993	ltr_avg	8.12757	0.116863	6.21227	1	Yes	DIFF
FBtr0083223	FBgn0038396	3R	A	NTS8	HK2	+	CG5013	14	3.90689	ltr_avg	6.93922	0.127186	5.93647	0	No	NONE
FBtr0088644	FBgn0033340	2R	A	NTS8	HK2	+	CG13751	104	6.71425	ltr_avg	8.81367	0.128656	7.05128	0	No	NONE
FBtr0078066	FBgn0031263	2L	A	NTS8	HK2	+	CG2789	68	6.10852	ltr_avg	11.4564	0.128692	7.77235	0	No	NONE
FBtr0076392	FBgn0036028	3L	A	NTS8	HK2	+	CG16717	4	2.32193	ltr_avg	7.14054	0.132755	6.2478	0	No	NONE
FBtr0086536	FBgn0003887	2R	A	NTS8	HK2	-	betaTub56D	442	8.79116	ltr_avg	12.1992	0.136595	9.01532	0	No	NONE
FBtr0333095	FBgn0031977	2L	A	NTS8	HK2	+	baf	32	5.04439	ltr_avg	10.1345	0.139895	8.10719	0	No	NONE
FBtr0331327	FBgn0032793	2L	A	NTS8	HK2	-	CG10189	6	2.80735	ltr_avg	6.81805	0.140478	5.00486	0	No	NONE
FBtr0079663	FBgn0020497	2L	A	NTS8	HK2	+	emb	7	3	ltr_avg	10.0981	0.142176	6.32485	0	No	NONE
FBtr0079537	FBgn0044323	2L	A	NTS8	HK2	+	Cka	53	5.75489	ltr_avg	8.7149	0.144518	8.56899	0	No	NONE
FBtr0303447	FBgn0032149	2L	A	NTS8	HK2	+	CG4036	21	4.45943	ltr_avg	7.62041	0.146051	5.83577	1	Yes	DIFF
FBtr0072788	FBgn0025820	3L	A	NTS8	HK2	-	JTBR	12	3.70044	ltr_avg	7.79276	0.148832	6.41635	0	No	NONE
FBtr0074918	FBgn0036916	3L	A	NTS8	HK2	-	Mtr3	18	4.24793	ltr_avg	6.81028	0.148927	6.25039	0	No	NONE
FBtr0100153	FBgn0001168	3L	A	NTS8	HK2	+	h	8	3.16993	ltr_avg	11.1379	0.149519	6.55563	0	No	NONE
FBtr0075483	FBgn0036580	3L	A	NTS8	HK2	-	PDCD-5	52	5.72792	ltr_avg	10.3001	0.156138	8.07561	0	No	NONE
FBtr0334594	FBgn0038369	3R	A	NTS8	HK2	+	Arpc3A	9	3.32193	ltr_avg	9.11731	0.167308	7.19951	0	No	NONE
FBtr0072823	FBgn0035243	3L	A	NTS8	HK2	-	CG13926	35	5.16993	ltr_avg	7.24039	0.167867	6.15998	0	No	NONE
FBtr0072412	FBgn0035082	2R	A	NTS8	HK2	-	CG2811	17	4.16993	ltr_avg	9.61384	0.168039	5.16043	0	No	NONE
FBtr0072998	FBgn0035397	3L	A	NTS8	HK2	+	CG11486	11	3.58496	ltr_avg	9.97885	0.170042	6.75407	0	No	NONE
FBtr0086890	FBgn0016059	2R	A	NTS8	HK2	-	Sema-1b	15	4	ltr_avg	9.25852	0.17024	6.46249	0	No	NONE
FBtr0073005	FBgn0035390	3L	A	NTS8	HK2	-	scramb2	15	4	ltr_avg	9.23521	0.171999	6.35179	0	No	NONE
FBtr0075390	FBgn0053158	3L	A	NTS8	HK2	+	CG33158	10	3.45943	ltr_avg	6.53268	0.172778	6.25546	0	No	NONE
FBtr0080367	FBgn0032430	2L	A	NTS8	HK2	+	CG6388	4	2.32193	ltr_avg	7.93595	0.175613	2.97974	0	No	NONE
FBtr0071582	FBgn0003891	2R	A	NTS8	HK2	+	tud	8	3.16993	ltr_avg	10.1944	0.181293	7.07467	0	No	NONE
FBtr0071792	FBgn0243516	2R	A	NTS8	HK2	-	Vrp1	66	6.06609	ltr_avg	9.42176	0.181523	6.09322	0	No	NONE
FBtr0072905	FBgn0035321	3L	A	NTS8	HK2	-	CG1275	113	6.83289	ltr_avg	11.0578	0.183322	9.12929	0	No	NONE
FBtr0083337	FBgn0015019	3R	A	NTS8	HK2	+	Cctgamma	42	5.42626	ltr_avg	9.97033	0.184652	7.87129	0	No	NONE
FBtr0301591	FBgn0013733	2R	A	NTS8	HK2	-	shot	2	1.58496	ltr_avg	11.1893	0.187786	6.38316	0	No	NONE
FBtr0087351	FBgn0024754	2R	A	NTS8	HK2	-	Flo-1	16	4.08746	ltr_avg	9.91983	0.196077	6.76625	0	No	NONE
FBtr0082797	FBgn0015778	3R	A	NTS8	HK2	+	rin	162	7.34873	ltr_avg	9.28423	0.196271	6.58798	0	No	NONE
FBtr0110910	FBgn0004087	3R	A	NTS8	HK2	+	Dhfr	8	3.16993	ltr_avg	8.86118	0.197405	4.0499	0	No	NONE
FBtr0082286	FBgn0037843	3R	A	NTS8	HK2	+	CG4511	128	7.01123	ltr_avg	7.51254	0.199791	6.43904	0	No	NONE
FBtr0085875	FBgn0002645	3R	A	NTS8	HK2	-	Map205	13	3.80735	ltr_avg	10.9525	0.199891	7.54053	0	No	NONE
FBtr0336876	FBgn0011217	3R	A	NTS8	HK2	-	eff	449	8.81378	ltu_avg	10.6595	0.0560573	10.2853	0	No	NONE
FBtr0334168	FBgn0032986	2L	A	NTS8	HK2	+	CG3262	3	2	ltu_avg	8.96182	0.0611394	8.24476	0	No	NONE
FBtr0078777	FBgn0037299	3R	A	NTS8	HK2	+	CG1115	26	4.75489	ltu_avg	8.32156	0.0670014	6.65751	0	No	NONE
FBtr0111163	FBgn0058045	3L	A	NTS8	HK2	+	CG40045	19	4.32193	ltu_avg	11.1687	0.0672718	8.49768	0	No	NONE
FBtr0071746	FBgn0050404	2R	A	NTS8	HK2	-	Tango11	121	6.93074	ltu_avg	9.38835	0.0808032	8.6174	0	No	NONE
FBtr0085241	FBgn0086346	3R	A	NTS8	HK2	-	ALiX	48	5.61471	ltu_avg	9.57793	0.0835136	8.25153	0	No	NONE
FBtr0072798	FBgn0027594	3L	A	NTS8	HK2	-	drpr	18	4.24793	ltu_avg	9.74288	0.0854536	7.89936	0	No	NONE
FBtr0075074	FBgn0027057	3L	A	NTS8	HK2	-	CSN1b	57	5.85798	ltu_avg	8.32038	0.0875013	7.48428	0	No	NONE
FBtr0332412	FBgn0031670	2L	A	NTS8	HK2	+	CG3887	405	8.66534	ltu_avg	10.3956	0.0879267	9.48756	0	No	NONE
FBtr0089112	FBgn0024811	4	A	NTS8	HK2	+	Crk	7	3	ltu_avg	10.6814	0.088675	8.37472	0	No	NONE
FBtr0088391	FBgn0261014	2R	A	NTS8	HK2	+	TER94	319	8.32193	ltu_avg	11.4421	0.0918674	10.7393	0	No	NONE
FBtr0084503	FBgn0015795	3R	A	NTS8	HK2	+	Rab7	34	5.12928	ltu_avg	11.709	0.0923506	8.83696	0	No	NONE
FBtr0079545	FBgn0011230	2L	A	NTS8	HK2	-	poe	19	4.32193	ltu_avg	10.2026	0.0925883	9.65998	0	No	NONE
FBtr0339550	FBgn0013746	2L	A	NTS8	HK2	-	alien	17	4.16993	ltu_avg	9.48815	0.0933456	8.04143	1	Yes	SAME
FBtr0337095	FBgn0010340	3R	A	NTS8	HK2	-	140up	10	3.45943	ltu_avg	7.39508	0.0937867	6.19125	0	No	NONE
FBtr0088623	FBgn0086656	2R	A	NTS8	HK2	-	shrb	84	6.40939	ltu_avg	10.741	0.0944274	8.0676	0	No	NONE
FBtr0082010	FBgn0026380	3R	A	NTS8	HK2	-	Prosbeta3	203	7.67243	ltu_avg	11.3328	0.097167	10.1579	0	No	NONE
FBtr0332139	FBgn0035853	3L	A	NTS8	HK2	-	Ubc12	75	6.24793	ltu_avg	9.65143	0.0972967	9.23766	0	No	NONE
FBtr0078462	FBgn0037116	3L	A	NTS8	HK2	-	CG7158	4	2.32193	ltu_avg	8.05918	0.0991783	5.76322	0	No	NONE
FBtr0306169	FBgn0004868	2L	A	NTS8	HK2	-	Gdi	99	6.64386	ltu_avg	11.3203	0.100124	8.58549	0	No	NONE
FBtr0078849	FBgn0004436	3R	A	NTS8	HK2	-	UbcD6	11	3.58496	ltu_avg	9.25312	0.103559	8.48202	0	No	NONE
FBtr0078958	FBgn0037231	3R	A	NTS8	HK2	-	vps24	45	5.52356	ltu_avg	10.2055	0.104859	8.73308	0	No	NONE
FBtr0089998	FBgn0023175	2R	A	NTS8	HK2	-	Prosalpha7	461	8.85175	ltu_avg	11.0045	0.106369	10.2938	0	No	NONE
FBtr0086910	FBgn0016697	2R	A	NTS8	HK2	+	Prosalpha5	110	6.79442	ltu_avg	11.0605	0.106588	9.77192	0	No	NONE
FBtr0084103	FBgn0043012	3R	A	NTS8	HK2	-	AP-2sigma	17	4.16993	ltu_avg	10.0562	0.106616	7.33487	0	No	NONE
FBtr0077389	FBgn0031643	2L	A	NTS8	HK2	+	CG3008	23	4.58496	ltu_avg	7.76628	0.107324	5.76141	0	No	NONE
FBtr0300705	FBgn0039150	3R	A	NTS8	HK2	-	CG13605	26	4.75489	ltu_avg	7.92402	0.109753	7.31993	0	No	NONE
FBtr0087262	FBgn0010590	2R	A	NTS8	HK2	-	Prosbeta1	161	7.33985	ltu_avg	11.0841	0.11166	10.1354	0	No	NONE
FBtr0082105	FBgn0037719	3R	A	NTS8	HK2	-	bocksbeutel	14	3.90689	ltu_avg	7.81074	0.111717	6.01227	0	No	NONE
FBtr0088618	FBgn0015477	2R	A	NTS8	HK2	-	Rme-8	6	2.80735	ltu_avg	8.2014	0.111995	6.84024	0	No	NONE
FBtr0087786	FBgn0010488	2R	A	NTS8	HK2	+	NAT1	94	6.56986	ltu_avg	11.0188	0.112045	9.41674	0	No	NONE
FBtr0077098	FBgn0035631	3L	A	NTS8	HK2	+	Txl	62	5.97728	ltu_avg	10.5517	0.113074	8.80592	0	No	NONE
FBtr0085407	FBgn0039650	3R	A	NTS8	HK2	-	Mesh1	4	2.32193	ltu_avg	6.70584	0.113441	4.52166	0	No	NONE
FBtr0088410	FBgn0001291	2R	A	NTS8	HK2	+	Jra	63	6	ltu_avg	8.48017	0.113714	7.11749	0	No	NONE
FBtr0075360	FBgn0002284	3L	A	NTS8	HK2	-	Prosbeta6	128	7.01123	ltu_avg	11.01	0.114366	9.71615	0	No	NONE
FBtr0079682	FBgn0032052	2L	A	NTS8	HK2	+	CG13089	17	4.16993	ltu_avg	8.15542	0.114727	7.51387	0	No	NONE
FBtr0078821	FBgn0037305	3R	A	NTS8	HK2	-	CG12173	15	4	ltu_avg	8.68848	0.114747	6.73765	0	No	NONE
FBtr0082680	FBgn0038058	3R	A	NTS8	HK2	-	CG5608	2	1.58496	ltu_avg	7.39878	0.115978	4.67928	0	No	NONE
FBtr0083561	FBgn0038582	3R	A	NTS8	HK2	+	CG7988	8	3.16993	ltu_avg	5.8052	0.116379	5.15458	0	No	NONE
FBtr0088947	FBgn0028687	2R	A	NTS8	HK2	-	Rpt1	102	6.6865	ltu_avg	11.2531	0.116761	9.27299	0	No	NONE
FBtr0082013	FBgn0037647	3R	A	NTS8	HK2	-	RagA-B	5	2.58496	ltu_avg	9.14607	0.117949	6.55395	0	No	NONE
FBtr0078699	FBgn0037345	3R	A	NTS8	HK2	+	rev7	5	2.58496	ltu_avg	7.20171	0.118999	6.17354	0	No	NONE
FBtr0080534	FBgn0024846	2L	A	NTS8	HK2	+	p38b	8	3.16993	ltu_avg	9.16242	0.120283	4.83242	0	No	NONE
FBtr0114493	FBgn0033886	2R	A	NTS8	HK2	-	Rpn13	237	7.89482	ltu_avg	10.6225	0.121838	9.71195	0	No	NONE
FBtr0084510	FBgn0039135	3R	A	NTS8	HK2	-	CG13603	7	3	ltu_avg	9.57663	0.123248	6.50813	0	No	NONE
FBtr0079086	FBgn0003716	2L	A	NTS8	HK2	-	tkv	3	2	ltu_avg	9.31662	0.123306	5.9718	0	No	NONE
FBtr0078629	FBgn0028690	3R	A	NTS8	HK2	+	Rpn5	129	7.02237	ltu_avg	11.3164	0.123414	9.37473	0	No	NONE
FBtr0332921	FBgn0002787	2R	A	NTS8	HK2	+	Rpn8	281	8.13955	ltu_avg	10.2244	0.124078	8.73511	0	No	NONE
FBtr0087742	FBgn0033813	2R	A	NTS8	HK2	+	fsd	33	5.08746	ltu_avg	6.1906	0.124084	5.80777	0	No	NONE
FBtr0086904	FBgn0034246	2R	A	NTS8	HK2	-	Dcr-2	6	2.80735	ltu_avg	8.57414	0.124318	6.47233	0	No	NONE
FBtr0072548	FBgn0035137	3L	A	NTS8	HK2	+	CG1233	7	3	ltu_avg	7.46695	0.124989	5.75424	0	No	NONE
FBtr0332630	FBgn0040010	2L	A	NTS8	HK2	+	CG17493	5	2.58496	ltu_avg	10.5549	0.126211	7.0199	0	No	NONE
FBtr0079403	FBgn0040954	2L	A	NTS8	HK2	+	CG13779	128	7.01123	ltu_avg	11.1381	0.127798	8.72503	0	No	NONE
FBtr0339724	FBgn0037551	3R	A	NTS8	HK2	+	Gie	10	3.45943	ltu_avg	8.64268	0.128314	6.39199	0	No	NONE
FBtr0071522	FBgn0261394	2R	A	NTS8	HK2	+	Prosalpha3	243	7.93074	ltu_avg	10.8756	0.128788	9.4652	0	No	NONE
FBtr0079027	FBgn0028694	2L	A	NTS8	HK2	-	Rpn11	227	7.83289	ltu_avg	10.7192	0.129467	9.1027	0	No	NONE
FBtr0083700	FBgn0261113	3R	A	NTS8	HK2	+	Xrp1	28	4.85798	ltu_avg	11.0282	0.12976	6.74838	0	No	NONE
FBtr0079192	FBgn0028419	2L	A	NTS8	HK2	+	Kr-h2	67	6.08746	ltu_avg	11.1222	0.129836	9.42943	0	No	NONE
FBtr0300776	FBgn0035528	3L	A	NTS8	HK2	-	CG15012	38	5.2854	ltu_avg	10.4382	0.131396	7.86421	0	No	NONE
FBtr0078368	FBgn0015283	3L	A	NTS8	HK2	+	Rpn10	184	7.53138	ltu_avg	10.9195	0.132029	9.78893	0	No	NONE
FBtr0333123	FBgn0036740	3L	A	NTS8	HK2	-	CG6259	129	7.02237	ltu_avg	10.5538	0.132462	9.45328	0	No	NONE
FBtr0080848	FBgn0000339	2L	A	NTS8	HK2	-	cni	29	4.90689	ltu_avg	10.4373	0.135685	8.60986	0	No	NONE
FBtr0072809	FBgn0035251	3L	A	NTS8	HK2	-	CG7967	56	5.83289	ltu_avg	9.88554	0.136536	7.11149	0	No	NONE
FBtr0078842	FBgn0037293	3R	A	NTS8	HK2	+	CG12007	12	3.70044	ltu_avg	8.66631	0.138535	5.86779	0	No	NONE
FBtr0080535	FBgn0028539	2L	A	NTS8	HK2	+	CG31731	10	3.45943	ltu_avg	9.1639	0.139932	7.73507	0	No	NONE
FBtr0077083	FBgn0029121	3L	A	NTS8	HK2	+	Sras	6	2.80735	ltu_avg	8.52751	0.140381	6.85936	2	Yes	MULTI
FBtr0084967	FBgn0039402	3R	A	NTS8	HK2	+	vps2	34	5.12928	ltu_avg	10.3661	0.140442	7.43088	0	No	NONE
FBtr0342906	FBgn0028546	2L	A	NTS8	HK2	-	ics	5	2.58496	ltu_avg	9.04862	0.14233	5.49112	0	No	NONE
FBtr0085385	FBgn0028692	3R	A	NTS8	HK2	+	Rpn2	142	7.15987	ltu_avg	10.911	0.142873	9.21324	0	No	NONE
FBtr0329967	FBgn0000318	2L	A	NTS8	HK2	+	cl	248	7.96	ltu_avg	11.1312	0.144048	9.6168	0	No	NONE
FBtr0084520	FBgn0015282	3R	A	NTS8	HK2	-	Rpt2	122	6.94251	ltu_avg	10.3079	0.144067	8.38114	0	No	NONE
FBtr0077477	FBgn0031590	2L	A	NTS8	HK2	-	CG3702	147	7.20945	ltu_avg	10.2764	0.144228	9.81438	0	No	NONE
FBtr0073108	FBgn0035415	3L	A	NTS8	HK2	-	CG14966	6	2.80735	ltu_avg	8.10597	0.144685	6.66759	0	No	NONE
FBtr0080725	FBgn0001977	2L	A	NTS8	HK2	-	l(2)35Bg	101	6.67243	ltu_avg	8.85939	0.147191	8.34521	0	No	NONE
FBtr0331669	FBgn0032216	2L	A	NTS8	HK2	-	CG5384	34	5.12928	ltu_avg	10.8886	0.147433	9.26119	0	No	NONE
FBtr0332720	FBgn0036929	3L	A	NTS8	HK2	+	CG7668	7	3	ltu_avg	9.43036	0.150473	5.76439	0	No	NONE
FBtr0082055	FBgn0037679	3R	A	NTS8	HK2	-	CG8866	4	2.32193	ltu_avg	7.28199	0.151742	4.58498	0	No	NONE
FBtr0072036	FBgn0034854	2R	A	NTS8	HK2	-	CG3493	8	3.16993	ltu_avg	8.91968	0.152596	6.41044	0	No	NONE
FBtr0077166	FBgn0035589	3L	A	NTS8	HK2	+	CHMP2B	38	5.2854	ltu_avg	8.22759	0.152722	6.16927	0	No	NONE
FBtr0076873	FBgn0035772	3L	A	NTS8	HK2	-	Sh3beta	16	4.08746	ltu_avg	11.4948	0.15298	8.56827	0	No	NONE
FBtr0087260	FBgn0034068	2R	A	NTS8	HK2	-	casp	53	5.75489	ltu_avg	9.32384	0.153013	8.71973	0	No	NONE
FBtr0084469	FBgn0028691	3R	A	NTS8	HK2	-	Rpn9	118	6.89482	ltu_avg	10.629	0.153615	8.99731	0	No	NONE
FBtr0336753	FBgn0037648	3R	A	NTS8	HK2	+	CG11975	13	3.80735	ltu_avg	8.62469	0.153704	6.03843	0	No	NONE
FBtr0077881	FBgn0011570	2L	A	NTS8	HK2	+	cpb	20	4.39232	ltu_avg	9.77454	0.154134	6.76171	0	No	NONE
FBtr0075308	FBgn0028693	3L	A	NTS8	HK2	+	Rpn12	30	4.9542	ltu_avg	10.6266	0.154785	6.39278	0	No	NONE
FBtr0083009	FBgn0038272	3R	A	NTS8	HK2	-	CG7265	14	3.90689	ltu_avg	8.55402	0.155315	5.76595	0	No	NONE
FBtr0084294	FBgn0028688	3R	A	NTS8	HK2	-	Rpn7	217	7.76818	ltu_avg	10.4296	0.156038	8.98631	1	Yes	DIFF
FBtr0084452	FBgn0028684	3R	A	NTS8	HK2	+	Rpt5	54	5.78136	ltu_avg	10.9136	0.156575	8.61849	0	No	NONE
FBtr0302289	FBgn0261396	2L	A	NTS8	HK2	+	Rpn3	174	7.45121	ltu_avg	10.6936	0.157307	8.35629	0	No	NONE
FBtr0078351	FBgn0086377	3L	A	NTS8	HK2	+	Syx7	59	5.90689	ltu_avg	10.2148	0.157815	8.49052	1	Yes	SAME
FBtr0079600	FBgn0032018	2L	A	NTS8	HK2	+	CG7806	4	2.32193	ltu_avg	9.03788	0.158048	6.8042	0	No	NONE
FBtr0071608	FBgn0034627	2R	A	NTS8	HK2	-	EfSec	1	1	ltu_avg	5.5029	0.158241	4.66099	0	No	NONE
FBtr0076441	FBgn0052039	3L	A	NTS8	HK2	+	CG32039	23	4.58496	ltu_avg	9.86939	0.158414	7.33063	0	No	NONE
FBtr0079997	FBgn0032224	2L	A	NTS8	HK2	+	Sps2	3	2	ltu_avg	9.46826	0.158577	6.52868	0	No	NONE
FBtr0301367	FBgn0011225	3R	A	NTS8	HK2	-	jar	100	6.65821	ltu_avg	9.8418	0.161911	8.31841	0	No	NONE
FBtr0073043	FBgn0035421	3L	A	NTS8	HK2	+	CG12034	47	5.58496	ltu_avg	8.89844	0.162417	8.53079	0	No	NONE
FBtr0110917	FBgn0260003	3R	A	NTS8	HK2	+	Dys	2	1.58496	ltu_avg	9.8041	0.162725	6.15691	0	No	NONE
FBtr0084035	FBgn0038854	3R	A	NTS8	HK2	-	CG7044	2	1.58496	ltu_avg	7.4058	0.164194	2.80976	0	No	NONE
FBtr0308602	FBgn0034744	2R	A	NTS8	HK2	+	Vps20	26	4.75489	ltu_avg	8.75185	0.164452	6.05419	0	No	NONE
FBtr0078192	FBgn0019947	3L	A	NTS8	HK2	+	Psn	40	5.35755	ltu_avg	9.46263	0.165199	7.56849	0	No	NONE
FBtr0079633	FBgn0032000	2L	A	NTS8	HK2	-	CG8372	43	5.45943	ltu_avg	10.0665	0.166673	7.84977	1	Yes	DIFF
FBtr0077410	FBgn0031637	2L	A	NTS8	HK2	-	CG2950	59	5.90689	ltu_avg	9.90172	0.168684	6.91695	0	No	NONE
FBtr0333883	FBgn0035981	3L	A	NTS8	HK2	+	CG4452	73	6.20945	ltu_avg	9.58948	0.169101	7.30981	0	No	NONE
FBtr0072483	FBgn0024945	3L	A	NTS8	HK2	+	NitFhit	26	4.75489	ltu_avg	9.49152	0.169334	7.09619	0	No	NONE
FBtr0300329	FBgn0036516	3L	A	NTS8	HK2	-	CG7656	234	7.87652	ltu_avg	8.27647	0.169812	5.7376	0	No	NONE
FBtr0088654	FBgn0033352	2R	A	NTS8	HK2	+	CG8232	7	3	ltu_avg	9.91132	0.170289	6.52164	0	No	NONE
FBtr0331615	FBgn0032846	2L	A	NTS8	HK2	+	CG10721	9	3.32193	ltu_avg	7.58021	0.170381	6.18489	0	No	NONE
FBtr0072832	FBgn0035283	3L	A	NTS8	HK2	+	CG12024	55	5.80735	ltu_avg	9.53259	0.170955	6.40702	0	No	NONE
FBtr0083490	FBgn0038533	3R	A	NTS8	HK2	-	CG7523	8	3.16993	ltu_avg	9.95681	0.173314	7.05198	0	No	NONE
FBtr0081186	FBgn0032729	2L	A	NTS8	HK2	-	CG10639	43	5.45943	ltu_avg	10.7644	0.17442	9.25735	0	No	NONE
FBtr0079977	FBgn0051717	2L	A	NTS8	HK2	+	CG31717	43	5.45943	ltu_avg	9.91652	0.176223	7.52418	0	No	NONE
FBtr0075700	FBgn0036448	3L	A	NTS8	HK2	-	mop	8	3.16993	ltu_avg	10.0416	0.176943	7.11248	0	No	NONE
FBtr0077844	FBgn0010288	2L	A	NTS8	HK2	-	Uch	341	8.41785	ltu_avg	11.2108	0.17802	10.6227	0	No	NONE
FBtr0083138	FBgn0038303	3R	A	NTS8	HK2	-	SIDL	3	2	ltu_avg	7.49223	0.178802	5.17313	0	No	NONE
FBtr0073093	FBgn0035425	3L	A	NTS8	HK2	-	CG17746	23	4.58496	ltu_avg	9.36069	0.180874	8.15748	0	No	NONE
FBtr0087761	FBgn0033812	2R	A	NTS8	HK2	-	Pex13	52	5.72792	ltu_avg	9.80887	0.18171	7.18311	0	No	NONE
FBtr0304987	FBgn0035558	3L	A	NTS8	HK2	+	CG11357	8	3.16993	ltu_avg	9.35052	0.183854	6.93948	0	No	NONE
FBtr0080143	FBgn0027363	2L	A	NTS8	HK2	+	Stam	27	4.80735	ltu_avg	10.3362	0.183955	7.82088	0	No	NONE
FBtr0082831	FBgn0000454	3R	A	NTS8	HK2	+	Dip-B	54	5.78136	ltu_avg	11.4474	0.184011	9.25289	0	No	NONE
FBtr0082424	FBgn0037933	3R	A	NTS8	HK2	+	Ho	96	6.59991	ltu_avg	10.6119	0.184876	9.35819	0	No	NONE
FBtr0074893	FBgn0028695	3L	A	NTS8	HK2	+	Rpn1	86	6.44294	ltu_avg	10.7151	0.186133	7.93749	0	No	NONE
FBtr0273382	FBgn0038651	3R	A	NTS8	HK2	-	CG14299	3	2	ltu_avg	8.83877	0.187943	5.43279	0	No	NONE
FBtr0083151	FBgn0038349	3R	A	NTS8	HK2	-	CG6045	24	4.64386	ltu_avg	10.0809	0.188051	7.90893	0	No	NONE
FBtr0085482	FBgn0019972	3R	A	NTS8	HK2	+	Ice	5	2.58496	ltu_avg	9.89486	0.188106	5.58391	1	Yes	SAME
FBtr0337091	FBgn0032587	2L	A	NTS8	HK2	-	CG5953	1	1	ltu_avg	8.26774	0.190464	3.76897	0	No	NONE
FBtr0080230	FBgn0032341	2L	A	NTS8	HK2	-	Reps	6	2.80735	ltu_avg	7.61634	0.191413	4.11821	0	No	NONE
FBtr0089751	FBgn0031450	2L	A	NTS8	HK2	+	Hrs	48	5.61471	ltu_avg	9.18091	0.194452	6.97298	0	No	NONE
FBtr0301342	FBgn0000239	2L	A	NTS8	HK2	-	bur	35	5.16993	ltu_avg	9.35116	0.195313	7.91712	0	No	NONE
FBtr0076461	FBgn0035995	3L	A	NTS8	HK2	+	CG3529	12	3.70044	ltu_avg	10.3454	0.196075	6.65583	0	No	NONE
FBtr0085419	FBgn0039625	3R	A	NTS8	HK2	-	beta4GalNAcTB	6	2.80735	ltu_avg	8.14425	0.196579	4.2981	0	No	NONE
FBtr0078218	FBgn0037007	3L	A	NTS8	HK2	-	CG5059	15	4	ltu_avg	11.6234	0.197357	6.25336	0	No	NONE
FBtr0075389	FBgn0028399	3L	A	NTS8	HK2	+	TMS1	47	5.58496	ltu_avg	11.7472	0.198891	8.3443	0	No	NONE
FBtr0084501	FBgn0039136	3R	A	NTS8	HK2	+	CG5902	19	4.32193	ltu_avg	9.6699	0.199129	6.45339	1	Yes	DIFF
FBtr0079869	FBgn0032147	2L	A	NTS8	HK2	+	IP3K1	3	2	ltu_avg	7.46649	0.19958	4.21791	0	No	NONE
FBtr0078279	FBgn0037018	3L	A	NTS8	HK2	-	CG4042	14	3.90689	ova_avg	7.5498	0.0689549	6.78958	0	No	NONE
FBtr0086135	FBgn0033100	2R	A	NTS8	HK2	-	CG3420	40	5.35755	ova_avg	8.69446	0.0755456	6.66117	0	No	NONE
FBtr0112862	FBgn0010551	2R	A	NTS8	HK2	+	l(2)03709	170	7.41785	ova_avg	10.8512	0.0788076	7.9837	0	No	NONE
FBtr0072114	FBgn0034876	2R	A	NTS8	HK2	-	wmd	92	6.53916	ova_avg	8.4811	0.0797457	8.29362	1	Yes	SAME
FBtr0084574	FBgn0039163	3R	A	NTS8	HK2	-	CG5515	78	6.30378	ova_avg	8.92603	0.0831329	7.94255	0	No	NONE
FBtr0075379	FBgn0260460	3L	A	NTS8	HK2	+	mRpS34	34	5.12928	ova_avg	8.20302	0.0853583	7.15152	0	No	NONE
FBtr0083123	FBgn0038316	3R	A	NTS8	HK2	-	CG6276	14	3.90689	ova_avg	7.77844	0.0863334	6.47527	0	No	NONE
FBtr0082695	FBgn0038106	3R	A	NTS8	HK2	+	CG7488	17	4.16993	ova_avg	7.79335	0.0878355	6.8636	0	No	NONE
FBtr0076255	FBgn0036090	3L	A	NTS8	HK2	+	CG8009	20	4.39232	ova_avg	8.33721	0.0880253	7.55557	1	Yes	SAME
FBtr0076939	FBgn0035722	3L	A	NTS8	HK2	-	CG10075	53	5.75489	ova_avg	8.08784	0.0905258	7.03635	0	No	NONE
FBtr0082090	FBgn0002431	3R	A	NTS8	HK2	-	hyd	15	4	ova_avg	9.56231	0.0918349	9.15667	0	No	NONE
FBtr0332194	FBgn0032236	2L	A	NTS8	HK2	+	mRpS7	32	5.04439	ova_avg	9.29028	0.0918407	8.02116	0	No	NONE
FBtr0078377	FBgn0037102	3L	A	NTS8	HK2	-	CG7172	32	5.04439	ova_avg	8.29151	0.0927417	6.73368	0	No	NONE
FBtr0332338	FBgn0031233	2L	A	NTS8	HK2	+	Tbc1d15-17	11	3.58496	ova_avg	8.33466	0.0931983	6.62069	0	No	NONE
FBtr0075519	FBgn0036557	3L	A	NTS8	HK2	+	mRpS31	12	3.70044	ova_avg	8.16472	0.0932586	6.64478	0	No	NONE
FBtr0078181	FBgn0024887	3L	A	NTS8	HK2	+	kin17	32	5.04439	ova_avg	7.74448	0.0935546	7.59953	0	No	NONE
FBtr0300743	FBgn0037655	3R	A	NTS8	HK2	-	CG11984	69	6.12928	ova_avg	9.19357	0.0949332	8.5141	0	No	NONE
FBtr0086077	FBgn0033005	2R	A	NTS8	HK2	+	CG3107	7	3	ova_avg	9.82177	0.0971968	8.33586	0	No	NONE
FBtr0333459	FBgn0037098	3L	A	NTS8	HK2	-	Wnk	9	3.32193	ova_avg	7.75263	0.0978357	7.12889	0	No	NONE
FBtr0076849	FBgn0082598	3L	A	NTS8	HK2	+	akirin	58	5.88264	ova_avg	10.4924	0.0985915	9.76476	0	No	NONE
FBtr0072084	FBgn0034893	2R	A	NTS8	HK2	+	mRpL43	34	5.12928	ova_avg	7.62694	0.0987918	6.92102	0	No	NONE
FBtr0086094	FBgn0033017	2R	A	NTS8	HK2	-	CG10465	23	4.58496	ova_avg	9.81487	0.0992164	8.68103	0	No	NONE
FBtr0071640	FBgn0034585	2R	A	NTS8	HK2	-	CG4030	8	3.16993	ova_avg	8.57729	0.0998893	7.48564	0	No	NONE
FBtr0078741	FBgn0017550	3R	A	NTS8	HK2	-	Rga	10	3.45943	ova_avg	8.7471	0.100039	6.39423	0	No	NONE
FBtr0089908	FBgn0032455	2L	A	NTS8	HK2	-	CG5792	13	3.80735	ova_avg	9.0315	0.100288	8.46614	0	No	NONE
FBtr0088924	FBgn0033209	2R	A	NTS8	HK2	+	CG12107	41	5.39232	ova_avg	9.48502	0.101211	8.51373	0	No	NONE
FBtr0084239	FBgn0038948	3R	A	NTS8	HK2	-	PSR	32	5.04439	ova_avg	7.28131	0.101307	5.96677	0	No	NONE
FBtr0087375	FBgn0013750	2R	A	NTS8	HK2	+	Arf51F	7	3	ova_avg	9.372	0.101749	7.76561	0	No	NONE
FBtr0304112	FBgn0051716	2L	A	NTS8	HK2	+	Cnot4	33	5.08746	ova_avg	9.5426	0.102135	8.79372	0	No	NONE
FBtr0339933	FBgn0026566	3R	A	NTS8	HK2	-	CG1307	64	6.02237	ova_avg	9.31665	0.102311	7.92666	0	No	NONE
FBtr0079983	FBgn0259482	2L	A	NTS8	HK2	+	Mob3	10	3.45943	ova_avg	8.83019	0.104943	7.01619	0	No	NONE
FBtr0087350	FBgn0013762	2R	A	NTS8	HK2	-	Cdk5	26	4.75489	ova_avg	8.4582	0.104972	4.84683	0	No	NONE
FBtr0072813	FBgn0035247	3L	A	NTS8	HK2	-	metl	10	3.45943	ova_avg	7.40568	0.105211	4.64551	0	No	NONE
FBtr0089879	FBgn0260859	3L	A	NTS8	HK2	-	Bet3	19	4.32193	ova_avg	7.61011	0.106333	6.57204	0	No	NONE
FBtr0083203	FBgn0038387	3R	A	NTS8	HK2	+	blp	21	4.45943	ova_avg	8.33824	0.106643	8.17073	0	No	NONE
FBtr0079467	FBgn0031909	2L	A	NTS8	HK2	-	CG5181	5	2.58496	ova_avg	7.67314	0.108622	7.29759	0	No	NONE
FBtr0076270	FBgn0036107	3L	A	NTS8	HK2	+	CG7949	37	5.24793	ova_avg	8.49571	0.109381	6.32478	0	No	NONE
FBtr0074915	FBgn0036920	3L	A	NTS8	HK2	-	CG8004	33	5.08746	ova_avg	8.10981	0.109624	6.64137	0	No	NONE
FBtr0333679	FBgn0026777	4	A	NTS8	HK2	+	Rad23	22	4.52356	ova_avg	10.2891	0.11158	8.55916	0	No	NONE
FBtr0083940	FBgn0015279	3R	A	NTS8	HK2	-	Pi3K92E	5	2.58496	ova_avg	8.62506	0.112159	6.51759	1	Yes	SAME
FBtr0076520	FBgn0035953	3L	A	NTS8	HK2	+	CG5087	6	2.80735	ova_avg	7.42209	0.112328	6.08836	0	No	NONE
FBtr0290256	FBgn0034970	2R	A	NTS8	HK2	-	yki	17	4.16993	ova_avg	8.49527	0.112423	7.66423	0	No	NONE
FBtr0085298	FBgn0001215	3R	A	NTS8	HK2	+	Hrb98DE	162	7.34873	ova_avg	10.7856	0.112659	9.6699	0	No	NONE
FBtr0084033	FBgn0038857	3R	A	NTS8	HK2	-	CG17282	10	3.45943	ova_avg	7.45971	0.112931	5.14113	0	No	NONE
FBtr0087578	FBgn0033907	2R	A	NTS8	HK2	-	mRpS16	138	7.11894	ova_avg	8.71617	0.113162	7.4516	0	No	NONE
FBtr0083551	FBgn0022943	3R	A	NTS8	HK2	+	Cbp20	79	6.32193	ova_avg	8.25946	0.113584	8.07373	0	No	NONE
FBtr0083084	FBgn0038319	3R	A	NTS8	HK2	+	mRpL9	46	5.55459	ova_avg	8.27295	0.114136	5.85156	0	No	NONE
FBtr0082537	FBgn0037981	3R	A	NTS8	HK2	+	Spt3	4	2.32193	ova_avg	6.57583	0.114226	5.01382	0	No	NONE
FBtr0299868	FBgn0039977	3L	A	NTS8	HK2	+	CG17454	15	4	ova_avg	9.44647	0.115379	7.83831	0	No	NONE
FBtr0077000	FBgn0024921	3L	A	NTS8	HK2	+	Trn	6	2.80735	ova_avg	9.90749	0.115534	6.72861	0	No	NONE
FBtr0078232	FBgn0036987	3L	A	NTS8	HK2	-	CG5274	11	3.58496	ova_avg	7.0458	0.115745	5.39348	0	No	NONE
FBtr0078124	FBgn0031231	2L	A	NTS8	HK2	+	mRpL10	27	4.80735	ova_avg	8.88196	0.11575	6.93253	0	No	NONE
FBtr0080027	FBgn0027052	2L	A	NTS8	HK2	+	CHIP	27	4.80735	ova_avg	8.71616	0.115923	7.67947	0	No	NONE
FBtr0071842	FBgn0034727	2R	A	NTS8	HK2	-	mRpS29	21	4.45943	ova_avg	8.0526	0.116093	6.42427	0	No	NONE
FBtr0302302	FBgn0035420	3L	A	NTS8	HK2	-	CG14967	10	3.45943	ova_avg	8.99344	0.117	8.83684	0	No	NONE
FBtr0080422	FBgn0021796	2L	A	NTS8	HK2	+	Tor	3	2	ova_avg	8.09605	0.117417	5.31798	0	No	NONE
FBtr0300882	FBgn0039936	4	A	NTS8	HK2	-	CG11148	13	3.80735	ova_avg	10.1145	0.11832	7.91962	0	No	NONE
FBtr0333051	FBgn0026418	3L	A	NTS8	HK2	+	Hsc70Cb	98	6.62936	ova_avg	9.31692	0.118476	7.96478	0	No	NONE
FBtr0306652	FBgn0034091	2R	A	NTS8	HK2	-	mrj	149	7.22882	ova_avg	9.25151	0.118583	7.40351	0	No	NONE
FBtr0304727	FBgn0040284	3R	A	NTS8	HK2	-	SF2	49	5.64386	ova_avg	10.4887	0.118598	8.73911	0	No	NONE
FBtr0084756	FBgn0015240	3R	A	NTS8	HK2	+	Hr96	11	3.58496	ova_avg	7.80282	0.11883	6.23657	0	No	NONE
FBtr0083684	FBgn0024329	3R	A	NTS8	HK2	-	Mekk1	2	1.58496	ova_avg	8.36906	0.120206	5.01211	0	No	NONE
FBtr0072225	FBgn0025336	2R	A	NTS8	HK2	-	CG4882	14	3.90689	ova_avg	8.37809	0.12088	6.4558	0	No	NONE
FBtr0071937	FBgn0019949	2R	A	NTS8	HK2	-	Cdk9	21	4.45943	ova_avg	7.92756	0.122094	6.90459	0	No	NONE
FBtr0072526	FBgn0035110	3L	A	NTS8	HK2	-	thoc7	12	3.70044	ova_avg	8.97006	0.122642	6.98292	0	No	NONE
FBtr0087763	FBgn0043010	2R	A	NTS8	HK2	-	Fsn	69	6.12928	ova_avg	8.74957	0.122783	8.39171	0	No	NONE
FBtr0076897	FBgn0029117	3L	A	NTS8	HK2	+	Surf1	41	5.39232	ova_avg	7.81906	0.12303	6.54788	0	No	NONE
FBtr0072153	FBgn0034946	2R	A	NTS8	HK2	+	CG3065	17	4.16993	ova_avg	8.27816	0.123678	6.93855	0	No	NONE
FBtr0077387	FBgn0031640	2L	A	NTS8	HK2	+	CG11926	12	3.70044	ova_avg	7.2898	0.1241	5.51091	0	No	NONE
FBtr0331967	FBgn0027507	2R	A	NTS8	HK2	+	CG1344	3	2	ova_avg	8.2618	0.124166	5.86572	0	No	NONE
FBtr0072776	FBgn0035272	3L	A	NTS8	HK2	+	mRpL46	32	5.04439	ova_avg	8.34876	0.124945	4.09477	0	No	NONE
FBtr0083066	FBgn0038313	3R	A	NTS8	HK2	+	CG4338	16	4.08746	ova_avg	8.01647	0.125307	6.98386	0	No	NONE
FBtr0071548	FBgn0001133	2R	A	NTS8	HK2	-	grau	30	4.9542	ova_avg	6.82293	0.125421	4.7453	1	Yes	DIFF
FBtr0087278	FBgn0053139	2R	A	NTS8	HK2	+	Ranbp11	43	5.45943	ova_avg	7.20334	0.126152	7.04261	0	No	NONE
FBtr0082128	FBgn0005777	3R	A	NTS8	HK2	+	PpD3	29	4.90689	ova_avg	9.01715	0.126244	7.15575	1	Yes	SAME
FBtr0113205	FBgn0037549	3R	A	NTS8	HK2	+	CG7878	16	4.08746	ova_avg	8.05312	0.126382	7.357	0	No	NONE
FBtr0088944	FBgn0033206	2R	A	NTS8	HK2	-	CG12042	6	2.80735	ova_avg	7.673	0.128028	4.65999	0	No	NONE
FBtr0071660	FBgn0034643	2R	A	NTS8	HK2	+	CG10321	19	4.32193	ova_avg	7.47382	0.128575	5.69671	0	No	NONE
FBtr0332195	FBgn0000413	2L	A	NTS8	HK2	+	da	24	4.64386	ova_avg	9.55981	0.128575	7.86493	0	No	NONE
FBtr0089253	FBgn0039923	4	A	NTS8	HK2	-	MED26	9	3.32193	ova_avg	10.1336	0.129028	7.99232	0	No	NONE
FBtr0335134	FBgn0031609	2L	A	NTS8	HK2	-	CG15443	4	2.32193	ova_avg	7.67962	0.129184	5.76449	0	No	NONE
FBtr0087976	FBgn0010339	2R	A	NTS8	HK2	+	128up	88	6.47573	ova_avg	9.37431	0.129461	8.24186	0	No	NONE
FBtr0081962	FBgn0037652	3R	A	NTS8	HK2	+	CG11980	7	3	ova_avg	8.6741	0.129953	5.82874	0	No	NONE
FBtr0290222	FBgn0037244	3R	A	NTS8	HK2	+	CG14647	4	2.32193	ova_avg	9.0698	0.130076	6.5328	0	No	NONE
FBtr0332946	FBgn0026533	2R	A	NTS8	HK2	+	Dek	22	4.52356	ova_avg	10.2706	0.130384	7.38484	0	No	NONE
FBtr0079955	FBgn0032196	2L	A	NTS8	HK2	-	CG5708	33	5.08746	ova_avg	9.08874	0.131135	8.71523	0	No	NONE
FBtr0331325	FBgn0002044	2L	A	NTS8	HK2	+	swm	18	4.24793	ova_avg	9.81105	0.131697	5.89593	0	No	NONE
FBtr0072227	FBgn0025335	2R	A	NTS8	HK2	-	CG4585	14	3.90689	ova_avg	9.25581	0.131725	6.56123	0	No	NONE
FBtr0081338	FBgn0032849	2L	A	NTS8	HK2	-	mRpS18B	13	3.80735	ova_avg	8.24761	0.132172	7.3661	0	No	NONE
FBtr0076252	FBgn0036111	3L	A	NTS8	HK2	-	Aps	63	6	ova_avg	9.74237	0.13228	8.17759	0	No	NONE
FBtr0081901	FBgn0037608	3R	A	NTS8	HK2	+	mRpL19	36	5.20945	ova_avg	8.2696	0.132519	6.75799	1	Yes	SAME
FBtr0079985	FBgn0032205	2L	A	NTS8	HK2	+	CG4957	16	4.08746	ova_avg	7.60617	0.13279	6.74931	0	No	NONE
FBtr0111239	FBgn0086683	2L	A	NTS8	HK2	-	Spf45	26	4.75489	ova_avg	9.22198	0.133081	7.20269	0	No	NONE
FBtr0089233	FBgn0052016	4	A	NTS8	HK2	-	CG32016	13	3.80735	ova_avg	9.18603	0.133371	7.86771	0	No	NONE
FBtr0087203	FBgn0034060	2R	A	NTS8	HK2	+	CG8370	5	2.58496	ova_avg	8.01935	0.133552	5.5707	0	No	NONE
FBtr0084522	FBgn0039126	3R	A	NTS8	HK2	-	CG13601	14	3.90689	ova_avg	8.18161	0.133639	7.2676	0	No	NONE
FBtr0072189	FBgn0034963	2R	A	NTS8	HK2	-	CG13567	9	3.32193	ova_avg	8.0236	0.133674	7.25378	1	Yes	SAME
FBtr0080434	FBgn0024291	2L	A	NTS8	HK2	+	Sir2	5	2.58496	ova_avg	9.56633	0.133723	4.98221	0	No	NONE
FBtr0083391	FBgn0038471	3R	A	NTS8	HK2	+	CG5220	13	3.80735	ova_avg	8.72789	0.133836	7.18118	0	No	NONE
FBtr0072409	FBgn0027599	2R	A	NTS8	HK2	-	CG2790	37	5.24793	ova_avg	7.73197	0.133992	7.69803	1	Yes	SAME
FBtr0075875	FBgn0036334	3L	A	NTS8	HK2	+	CG11267	108	6.76818	ova_avg	10.8812	0.134895	8.76553	0	No	NONE
FBtr0084347	FBgn0027526	3R	A	NTS8	HK2	+	Ublcp1	56	5.83289	ova_avg	8.94467	0.134946	8.54794	0	No	NONE
FBtr0082793	FBgn0004049	3R	A	NTS8	HK2	-	yrt	13	3.80735	ova_avg	8.24565	0.13512	5.64348	0	No	NONE
FBtr0079215	FBgn0031773	2L	A	NTS8	HK2	-	Fbw5	8	3.16993	ova_avg	7.6042	0.135671	7.15276	0	No	NONE
FBtr0076685	FBgn0026252	3L	A	NTS8	HK2	+	msk	33	5.08746	ova_avg	10.4497	0.135689	7.87195	0	No	NONE
FBtr0086297	FBgn0034503	2R	A	NTS8	HK2	-	MED8	30	4.9542	ova_avg	8.01842	0.135907	6.50256	0	No	NONE
FBtr0087242	FBgn0034087	2R	A	NTS8	HK2	+	clu	31	5	ova_avg	9.2511	0.136351	5.86521	0	No	NONE
FBtr0086706	FBgn0034362	2R	A	NTS8	HK2	+	CG5323	33	5.08746	ova_avg	9.13196	0.136837	8.41679	0	No	NONE
FBtr0084535	FBgn0043455	3R	A	NTS8	HK2	+	CG5986	19	4.32193	ova_avg	8.12033	0.136864	6.44429	0	No	NONE
FBtr0079986	FBgn0260750	2L	A	NTS8	HK2	+	Mulk	20	4.39232	ova_avg	7.41715	0.136911	7.15757	0	No	NONE
FBtr0087806	FBgn0033783	2R	A	NTS8	HK2	-	CG17019	4	2.32193	ova_avg	9.13734	0.138686	5.74844	0	No	NONE
FBtr0075121	FBgn0036774	3L	A	NTS8	HK2	+	mRpS26	60	5.93074	ova_avg	8.14675	0.138985	6.65494	0	No	NONE
FBtr0306854	FBgn0036538	3L	A	NTS8	HK2	-	CG15715	145	7.18982	ova_avg	10.0781	0.139243	9.82445	0	No	NONE
FBtr0076444	FBgn0035980	3L	A	NTS8	HK2	+	CG4447	8	3.16993	ova_avg	7.15415	0.139427	5.18792	0	No	NONE
FBtr0083125	FBgn0027378	3R	A	NTS8	HK2	-	MRG15	28	4.85798	ova_avg	7.89526	0.139786	5.4186	0	No	NONE
FBtr0084368	FBgn0039056	3R	A	NTS8	HK2	+	CenB1A	12	3.70044	ova_avg	8.45649	0.139795	6.3886	0	No	NONE
FBtr0088600	FBgn0033400	2R	A	NTS8	HK2	-	CG2063	20	4.39232	ova_avg	8.24855	0.13986	6.31712	0	No	NONE
FBtr0078131	FBgn0024352	2L	A	NTS8	HK2	+	Hop	101	6.67243	ova_avg	10.6594	0.140024	9.35399	0	No	NONE
FBtr0077154	FBgn0035603	3L	A	NTS8	HK2	-	CG10635	91	6.52356	ova_avg	9.37537	0.14055	7.92646	0	No	NONE
FBtr0071860	FBgn0026261	2R	A	NTS8	HK2	+	bonsai	38	5.2854	ova_avg	8.99947	0.140898	7.19478	0	No	NONE
FBtr0307032	FBgn0004838	2L	A	NTS8	HK2	+	Hrb27C	71	6.16993	ova_avg	11.1523	0.141257	7.92123	0	No	NONE
FBtr0085558	FBgn0003512	3R	A	NTS8	HK2	+	Sry-delta	33	5.08746	ova_avg	7.89971	0.141365	6.79321	0	No	NONE
FBtr0078276	FBgn0037022	3L	A	NTS8	HK2	-	CG11396	22	4.52356	ova_avg	7.52565	0.141453	6.32351	0	No	NONE
FBtr0084463	FBgn0039115	3R	A	NTS8	HK2	-	CG10214	12	3.70044	ova_avg	8.70953	0.141644	6.35265	0	No	NONE
FBtr0077408	FBgn0031639	2L	A	NTS8	HK2	-	mRpS2	11	3.58496	ova_avg	8.02514	0.141836	5.60705	0	No	NONE
FBtr0088727	FBgn0033317	2R	A	NTS8	HK2	-	CG8635	90	6.50779	ova_avg	8.93702	0.141881	7.94859	0	No	NONE
FBtr0076210	FBgn0036133	3L	A	NTS8	HK2	+	CG7638	8	3.16993	ova_avg	8.52918	0.142162	7.10044	0	No	NONE
FBtr0085523	FBgn0039712	3R	A	NTS8	HK2	-	CG15514	19	4.32193	ova_avg	8.04033	0.142816	5.71659	1	Yes	DIFF
FBtr0075992	FBgn0036248	3L	A	NTS8	HK2	+	ssp	36	5.20945	ova_avg	8.43668	0.14282	7.34671	0	No	NONE
FBtr0084554	FBgn0029503	3R	A	NTS8	HK2	+	CHORD	22	4.52356	ova_avg	8.09633	0.142995	7.30032	0	No	NONE
FBtr0077462	FBgn0031598	2L	A	NTS8	HK2	-	CG3338	6	2.80735	ova_avg	7.24469	0.143034	6.08984	0	No	NONE
FBtr0331208	FBgn0020622	2L	A	NTS8	HK2	+	Pi3K21B	4	2.32193	ova_avg	8.73114	0.143493	5.76047	0	No	NONE
FBtr0072253	FBgn0021875	2R	A	NTS8	HK2	+	Zfrp8	5	2.58496	ova_avg	6.62678	0.143519	4.58287	0	No	NONE
FBtr0075897	FBgn0036335	3L	A	NTS8	HK2	-	mRpL20	8	3.16993	ova_avg	8.54321	0.143559	5.52318	0	No	NONE
FBtr0081642	FBgn0010774	3R	A	NTS8	HK2	-	Ref1	113	6.83289	ova_avg	10.3249	0.145378	8.90302	0	No	NONE
FBtr0075969	FBgn0020388	3L	A	NTS8	HK2	-	Gcn5	7	3	ova_avg	7.93364	0.145651	4.84903	0	No	NONE
FBtr0072168	FBgn0034964	2R	A	NTS8	HK2	+	IntS1	15	4	ova_avg	7.50825	0.145942	6.59494	1	Yes	DIFF
FBtr0085607	FBgn0039732	3R	A	NTS8	HK2	-	CG15525	39	5.32193	ova_avg	7.24568	0.146188	5.97614	0	No	NONE
FBtr0087987	FBgn0010621	2R	A	NTS8	HK2	+	Cct5	105	6.72792	ova_avg	10.4918	0.146328	8.34435	0	No	NONE
FBtr0331990	FBgn0032042	2L	A	NTS8	HK2	-	CG13398	2	1.58496	ova_avg	7.8626	0.14652	3.77069	0	No	NONE
FBtr0072554	FBgn0035145	3L	A	NTS8	HK2	+	MED14	11	3.58496	ova_avg	8.5739	0.146749	6.67598	0	No	NONE
FBtr0083147	FBgn0038344	3R	A	NTS8	HK2	+	CG5205	2	1.58496	ova_avg	8.06785	0.146934	5.84678	0	No	NONE
FBtr0301626	FBgn0035374	3L	A	NTS8	HK2	+	mRpS35	14	3.90689	ova_avg	8.27127	0.147018	5.50666	0	No	NONE
FBtr0304957	FBgn0085436	2R	A	NTS8	HK2	-	Not1	35	5.16993	ova_avg	9.41613	0.147369	5.15204	0	No	NONE
FBtr0334297	FBgn0038196	3R	A	NTS8	HK2	-	CG9922	187	7.55459	ova_avg	9.90901	0.14749	9.88894	0	No	NONE
FBtr0074946	FBgn0036893	3L	A	NTS8	HK2	+	CG9376	11	3.58496	ova_avg	7.82588	0.147629	6.5842	0	No	NONE
FBtr0076694	FBgn0035851	3L	A	NTS8	HK2	+	MED24	2	1.58496	ova_avg	7.10511	0.148154	4.25798	0	No	NONE
FBtr0087759	FBgn0033816	2R	A	NTS8	HK2	-	CG4679	6	2.80735	ova_avg	7.83208	0.148182	6.42901	0	No	NONE
FBtr0079427	FBgn0031882	2L	A	NTS8	HK2	-	Rab30	20	4.39232	ova_avg	7.83486	0.148477	4.42804	0	No	NONE
FBtr0084496	FBgn0039132	3R	A	NTS8	HK2	+	AP-1sigma	9	3.32193	ova_avg	9.80191	0.148518	6.6683	0	No	NONE
FBtr0085843	FBgn0005632	3R	A	NTS8	HK2	+	faf	5	2.58496	ova_avg	8.11689	0.148617	5.29375	0	No	NONE
FBtr0084360	FBgn0039044	3R	A	NTS8	HK2	-	p53	3	2	ova_avg	7.58358	0.148673	5.93718	0	No	NONE
FBtr0079601	FBgn0032020	2L	A	NTS8	HK2	+	CG7787	7	3	ova_avg	8.05124	0.14887	6.51587	0	No	NONE
FBtr0086502	FBgn0034451	2R	A	NTS8	HK2	-	TBCB	44	5.49185	ova_avg	9.03692	0.149043	8.40318	0	No	NONE
FBtr0340650	FBgn0031229	2L	A	NTS8	HK2	+	CG3436	7	3	ova_avg	9.18592	0.149275	6.09917	0	No	NONE
FBtr0088845	FBgn0015509	2R	A	NTS8	HK2	+	lin19	84	6.40939	ova_avg	10.2457	0.149344	7.12428	0	No	NONE
FBtr0079847	FBgn0011207	2L	A	NTS8	HK2	+	pelo	28	4.85798	ova_avg	8.5948	0.149634	7.91109	0	No	NONE
FBtr0078827	FBgn0040208	3R	A	NTS8	HK2	-	Kat60	15	4	ova_avg	9.03958	0.149755	6.57737	0	No	NONE
FBtr0088255	FBgn0024956	2R	A	NTS8	HK2	-	Mat1	17	4.16993	ova_avg	8.46976	0.149853	6.7366	0	No	NONE
FBtr0086782	FBgn0001222	2R	A	NTS8	HK2	-	Hsf	11	3.58496	ova_avg	9.49066	0.15005	7.34331	0	No	NONE
FBtr0310139	FBgn0033996	2R	A	NTS8	HK2	+	CG11807	23	4.58496	ova_avg	8.80774	0.150079	8.31429	0	No	NONE
FBtr0084583	FBgn0051133	3R	A	NTS8	HK2	-	Slimp	2	1.58496	ova_avg	6.10491	0.150084	3.37272	0	No	NONE
FBtr0075330	FBgn0036668	3L	A	NTS8	HK2	+	CG9715	11	3.58496	ova_avg	9.01809	0.150195	7.29393	0	No	NONE
FBtr0079352	FBgn0021944	2L	A	NTS8	HK2	+	Coprox	68	6.10852	ova_avg	8.34735	0.150324	8.25161	0	No	NONE
FBtr0082709	FBgn0260962	3R	A	NTS8	HK2	+	pic	12	3.70044	ova_avg	9.877	0.150502	7.84689	0	No	NONE
FBtr0330225	FBgn0000183	2L	A	NTS8	HK2	-	BicD	10	3.45943	ova_avg	8.76993	0.150611	5.40601	0	No	NONE
FBtr0084935	FBgn0028717	3R	A	NTS8	HK2	+	Lnk	4	2.32193	ova_avg	8.35975	0.150901	5.54488	0	No	NONE
FBtr0331970	FBgn0033029	2R	A	NTS8	HK2	-	l(2)NC136	9	3.32193	ova_avg	8.91323	0.151062	6.72598	1	Yes	DIFF
FBtr0077850	FBgn0000097	2L	A	NTS8	HK2	-	aop	1	1	ova_avg	8.50729	0.151086	4.88549	0	No	NONE
FBtr0084765	FBgn0039270	3R	A	NTS8	HK2	+	PQBP1	11	3.58496	ova_avg	7.60544	0.151563	6.02075	0	No	NONE
FBtr0072205	FBgn0034945	2R	A	NTS8	HK2	-	CG10904	14	3.90689	ova_avg	7.59711	0.151702	5.16163	0	No	NONE
FBtr0309864	FBgn0039929	4	A	NTS8	HK2	-	CG11076	37	5.24793	ova_avg	9.72474	0.151753	7.83573	0	No	NONE
FBtr0078227	FBgn0036990	3L	A	NTS8	HK2	-	mRpL15	49	5.64386	ova_avg	8.42458	0.151809	7.63371	0	No	NONE
FBtr0310415	FBgn0035122	3L	A	NTS8	HK2	+	mRpL17	6	2.80735	ova_avg	9.16227	0.152003	6.37346	0	No	NONE
FBtr0077768	FBgn0031422	2L	A	NTS8	HK2	+	CG9870	1	1	ova_avg	7.05397	0.152054	4.72398	0	No	NONE
FBtr0082364	FBgn0037884	3R	A	NTS8	HK2	-	Arfip	12	3.70044	ova_avg	8.77901	0.152271	7.46831	0	No	NONE
FBtr0077959	FBgn0031308	2L	A	NTS8	HK2	+	CG4749	3	2	ova_avg	6.89942	0.152779	0.972364	0	No	NONE
FBtr0086091	FBgn0033021	2R	A	NTS8	HK2	-	CG10417	22	4.52356	ova_avg	9.84857	0.152912	7.29299	0	No	NONE
FBtr0080411	FBgn0032444	2L	A	NTS8	HK2	-	CG5525	62	5.97728	ova_avg	10.0539	0.153293	8.10863	0	No	NONE
FBtr0305502	FBgn0037051	3L	A	NTS8	HK2	-	CG10565	154	7.27612	ova_avg	9.33995	0.15348	8.91067	0	No	NONE
FBtr0079098	FBgn0051648	2L	A	NTS8	HK2	+	CG31648	25	4.70044	ova_avg	7.08629	0.153575	4.49754	0	No	NONE
FBtr0082352	FBgn0037880	3R	A	NTS8	HK2	+	CG17726	7	3	ova_avg	6.53263	0.153846	5.24699	0	No	NONE
FBtr0078770	FBgn0037327	3R	A	NTS8	HK2	-	PEK	6	2.80735	ova_avg	8.7683	0.154041	5.08117	0	No	NONE
FBtr0085955	FBgn0032988	2L	A	NTS8	HK2	+	Tif-IA	11	3.58496	ova_avg	9.87888	0.154322	8.77621	0	No	NONE
FBtr0087852	FBgn0026741	2R	A	NTS8	HK2	+	mRpL18	22	4.52356	ova_avg	8.08069	0.154427	6.05597	0	No	NONE
FBtr0091446	FBgn0053506	2R	A	NTS8	HK2	-	CG33506	6	2.80735	ova_avg	8.06112	0.154429	6.31464	0	No	NONE
FBtr0071905	FBgn0034794	2R	A	NTS8	HK2	-	Gmer	18	4.24793	ova_avg	8.15061	0.154713	6.71356	0	No	NONE
FBtr0086185	FBgn0033121	2R	A	NTS8	HK2	-	Cyp6u1	15	4	ova_avg	8.01886	0.154758	6.46227	0	No	NONE
FBtr0075972	FBgn0036292	3L	A	NTS8	HK2	-	CG10646	3	2	ova_avg	7.04701	0.155208	3.9244	0	No	NONE
FBtr0085744	FBgn0002413	3R	A	NTS8	HK2	-	dco	37	5.24793	ova_avg	9.63997	0.155338	6.09937	0	No	NONE
FBtr0332577	FBgn0086447	2L	A	NTS8	HK2	-	l(2)37Cg	3	2	ova_avg	8.03915	0.155444	5.52031	0	No	NONE
FBtr0085476	FBgn0039691	3R	A	NTS8	HK2	+	IntS11	5	2.58496	ova_avg	7.66025	0.155487	4.31265	0	No	NONE
FBtr0078647	FBgn0028436	3R	A	NTS8	HK2	+	ECSIT	6	2.80735	ova_avg	6.75699	0.155672	4.67698	0	No	NONE
FBtr0072429	FBgn0035064	2R	A	NTS8	HK2	-	Aats-tyr-m	6	2.80735	ova_avg	6.91898	0.155706	4.25911	1	Yes	DIFF
FBtr0089853	FBgn0032120	2L	A	NTS8	HK2	+	CG33298	1	1	ova_avg	8.81415	0.155844	5.96443	0	No	NONE
FBtr0088832	FBgn0003317	2R	A	NTS8	HK2	+	sax	14	3.90689	ova_avg	9.13468	0.156042	7.59427	0	No	NONE
FBtr0085823	FBgn0039863	3R	A	NTS8	HK2	+	CG1815	12	3.70044	ova_avg	9.10118	0.156455	6.09443	0	No	NONE
FBtr0334813	FBgn0031391	2L	A	NTS8	HK2	-	CG11723	18	4.24793	ova_avg	8.46407	0.157069	6.92203	0	No	NONE
FBtr0085874	FBgn0002780	3R	A	NTS8	HK2	+	mod	16	4.08746	ova_avg	11.0111	0.157101	7.07883	0	No	NONE
FBtr0072191	FBgn0013764	2R	A	NTS8	HK2	-	Chi	44	5.49185	ova_avg	8.62476	0.157799	6.50217	0	No	NONE
FBtr0075084	FBgn0036814	3L	A	NTS8	HK2	-	CG14073	24	4.64386	ova_avg	7.70575	0.158057	7.31361	0	No	NONE
FBtr0085839	FBgn0022349	3R	A	NTS8	HK2	+	CG1910	13	3.80735	ova_avg	9.11385	0.158362	5.88105	0	No	NONE
FBtr0075278	FBgn0036691	3L	A	NTS8	HK2	+	beg	8	3.16993	ova_avg	7.34975	0.158518	5.05024	0	No	NONE
FBtr0340214	FBgn0021818	2R	A	NTS8	HK2	-	cnk	3	2	ova_avg	8.51475	0.158776	5.80669	0	No	NONE
FBtr0085899	FBgn0032956	2L	A	NTS8	HK2	+	Cul-2	34	5.12928	ova_avg	8.88353	0.158854	8.44361	0	No	NONE
FBtr0084468	FBgn0039110	3R	A	NTS8	HK2	-	RanBP3	94	6.56986	ova_avg	9.176	0.158913	8.79935	0	No	NONE
FBtr0088683	FBgn0033342	2R	A	NTS8	HK2	-	CG8258	52	5.72792	ova_avg	10.5812	0.159284	8.72312	0	No	NONE
FBtr0087036	FBgn0025830	2R	A	NTS8	HK2	+	IntS8	3	2	ova_avg	6.90471	0.159336	4.91463	1	Yes	DIFF
FBtr0301014	FBgn0054039	3L	A	NTS8	HK2	+	CG34039	83	6.39232	ova_avg	7.81226	0.15954	7.79999	1	Yes	DIFF
FBtr0075098	FBgn0042134	3L	A	NTS8	HK2	-	Capr	51	5.70044	ova_avg	10.0776	0.160082	7.80592	0	No	NONE
FBtr0071609	FBgn0034626	2R	A	NTS8	HK2	-	CG10795	18	4.24793	ova_avg	8.33197	0.160092	6.14888	0	No	NONE
FBtr0299957	FBgn0259704	3R	A	NTS8	HK2	-	CG42358	17	4.16993	ova_avg	8.08134	0.160226	8.06382	0	No	NONE
FBtr0080246	FBgn0032363	2L	A	NTS8	HK2	-	CG6509	2	1.58496	ova_avg	8.54553	0.160258	5.08829	0	No	NONE
FBtr0309865	FBgn0025741	4	A	NTS8	HK2	-	plexA	5	2.58496	ova_avg	9.93922	0.160401	7.99916	0	No	NONE
FBtr0081918	FBgn0037632	3R	A	NTS8	HK2	+	Tcp-1eta	47	5.58496	ova_avg	10.2923	0.160645	8.14654	0	No	NONE
FBtr0081820	FBgn0037539	3R	A	NTS8	HK2	-	CG10435	21	4.45943	ova_avg	7.33607	0.160654	5.37904	0	No	NONE
FBtr0084216	FBgn0038953	3R	A	NTS8	HK2	+	CG18596	5	2.58496	ova_avg	6.65595	0.161434	6.21598	0	No	NONE
FBtr0084231	FBgn0038961	3R	A	NTS8	HK2	-	CG13850	5	2.58496	ova_avg	7.72564	0.161548	5.87015	0	No	NONE
FBtr0299923	FBgn0033000	2R	A	NTS8	HK2	+	CG14464	9	3.32193	ova_avg	10.2399	0.161621	6.95962	1	Yes	SAME
FBtr0084816	FBgn0039306	3R	A	NTS8	HK2	+	CG11859	8	3.16993	ova_avg	8.03952	0.161634	6.16762	1	Yes	SAME
FBtr0076471	FBgn0036005	3L	A	NTS8	HK2	-	pall	12	3.70044	ova_avg	7.70065	0.161967	6.43304	0	No	NONE
FBtr0335224	FBgn0037535	3R	A	NTS8	HK2	+	CG14463	5	2.58496	ova_avg	7.02262	0.162078	5.78258	1	Yes	DIFF
FBtr0082275	FBgn0260944	3R	A	NTS8	HK2	+	Rbp1	29	4.90689	ova_avg	9.49412	0.162117	7.93768	0	No	NONE
FBtr0081469	FBgn0032921	2L	A	NTS8	HK2	+	Mpp6	32	5.04439	ova_avg	7.6156	0.162155	6.72309	0	No	NONE
FBtr0086579	FBgn0027535	2R	A	NTS8	HK2	+	botv	1	1	ova_avg	7.66343	0.16305	3.61983	0	No	NONE
FBtr0333168	FBgn0029006	2R	A	NTS8	HK2	+	lack	38	5.2854	ova_avg	8.72668	0.163283	5.91983	0	No	NONE
FBtr0088942	FBgn0033208	2R	A	NTS8	HK2	-	mRpL52	130	7.03342	ova_avg	8.12993	0.164032	6.43676	0	No	NONE
FBtr0081468	FBgn0032919	2L	A	NTS8	HK2	+	CG9253	6	2.80735	ova_avg	9.00215	0.164287	5.58966	0	No	NONE
FBtr0076265	FBgn0036099	3L	A	NTS8	HK2	+	CG11811	12	3.70044	ova_avg	9.08027	0.164735	6.02892	0	No	NONE
FBtr0072607	FBgn0260862	3L	A	NTS8	HK2	-	Vti1	11	3.58496	ova_avg	8.65828	0.164902	5.76998	1	Yes	SAME
FBtr0084176	FBgn0038928	3R	A	NTS8	HK2	+	Fadd	2	1.58496	ova_avg	7.16616	0.164973	4.9796	0	No	NONE
FBtr0080984	FBgn0032644	2L	A	NTS8	HK2	+	CG5131	19	4.32193	ova_avg	7.92139	0.16503	5.08874	0	No	NONE
FBtr0080075	FBgn0260749	2L	A	NTS8	HK2	-	Utx	7	3	ova_avg	7.88103	0.165061	7.10837	0	No	NONE
FBtr0082953	FBgn0038234	3R	A	NTS8	HK2	+	mRpL11	9	3.32193	ova_avg	7.64729	0.165073	5.74021	0	No	NONE
FBtr0290319	FBgn0042693	3R	A	NTS8	HK2	+	PP2A-B'	16	4.08746	ova_avg	8.2917	0.165143	7.39449	0	No	NONE
FBtr0085759	FBgn0039835	3R	A	NTS8	HK2	+	mRpL32	9	3.32193	ova_avg	8.00262	0.165863	6.86299	0	No	NONE
FBtr0084938	FBgn0039385	3R	A	NTS8	HK2	+	CG5913	15	4	ova_avg	8.28337	0.165909	7.0622	0	No	NONE
FBtr0079581	FBgn0261064	2L	A	NTS8	HK2	+	Rbsn-5	28	4.85798	ova_avg	7.78423	0.166333	7.25307	0	No	NONE
FBtr0079984	FBgn0032204	2L	A	NTS8	HK2	+	CG4953	2	1.58496	ova_avg	7.86501	0.166694	4.74885	0	No	NONE
FBtr0081133	FBgn0032728	2L	A	NTS8	HK2	+	Tango6	1	1	ova_avg	6.91541	0.166943	4.02782	0	No	NONE
FBtr0075774	FBgn0036405	3L	A	NTS8	HK2	+	CG6833	21	4.45943	ova_avg	7.96036	0.167009	7.22596	0	No	NONE
FBtr0084322	FBgn0039020	3R	A	NTS8	HK2	-	CG17141	18	4.24793	ova_avg	4.75864	0.167035	3.80533	0	No	NONE
FBtr0301276	FBgn0023388	2L	A	NTS8	HK2	-	Dap160	27	4.80735	ova_avg	8.23998	0.167101	7.94467	0	No	NONE
FBtr0085606	FBgn0039735	3R	A	NTS8	HK2	-	CG7911	228	7.8392	ova_avg	10.9093	0.167406	8.57093	0	No	NONE
FBtr0073322	FBgn0052243	3L	A	NTS8	HK2	-	CG32243	11	3.58496	ova_avg	8.78623	0.167462	7.13023	0	No	NONE
FBtr0084546	FBgn0026317	3R	A	NTS8	HK2	+	Tsc1	25	4.70044	ova_avg	8.68271	0.167547	6.4217	0	No	NONE
FBtr0114465	FBgn0003016	2L	A	NTS8	HK2	-	osp	4	2.32193	ova_avg	8.10971	0.167697	5.82051	0	No	NONE
FBtr0072220	FBgn0034925	2R	A	NTS8	HK2	-	CG5339	29	4.90689	ova_avg	8.66249	0.167713	6.93942	0	No	NONE
FBtr0083839	FBgn0038769	3R	A	NTS8	HK2	-	CG10889	1	1	ova_avg	6.36612	0.169078	4.62074	0	No	NONE
FBtr0072528	FBgn0027587	3L	A	NTS8	HK2	-	CG7028	12	3.70044	ova_avg	8.69344	0.169126	6.12157	0	No	NONE
FBtr0081087	FBgn0032679	2L	A	NTS8	HK2	-	bsf	11	3.58496	ova_avg	8.61945	0.169534	6.45839	0	No	NONE
FBtr0088126	FBgn0024188	2R	A	NTS8	HK2	+	san	175	7.45943	ova_avg	8.96826	0.16968	8.04758	0	No	NONE
FBtr0072486	FBgn0035111	3L	A	NTS8	HK2	+	CG16940	21	4.45943	ova_avg	8.77533	0.169711	8.4818	1	Yes	SAME
FBtr0082140	FBgn0037756	3R	A	NTS8	HK2	+	CG8507	33	5.08746	ova_avg	10.0379	0.16984	7.23039	0	No	NONE
FBtr0342934	FBgn0031696	2L	A	NTS8	HK2	+	Bub1	28	4.85798	ova_avg	7.48315	0.16999	7.44374	0	No	NONE
FBtr0079930	FBgn0043456	2L	A	NTS8	HK2	+	CG4747	41	5.39232	ova_avg	9.60509	0.170127	6.61714	0	No	NONE
FBtr0073348	FBgn0027085	3L	A	NTS8	HK2	+	Aats-leu	2	1.58496	ova_avg	7.39767	0.170675	4.76201	0	No	NONE
FBtr0076395	FBgn0015321	3L	A	NTS8	HK2	+	UbcD4	833	9.7039	ova_avg	8.96605	0.171528	6.59028	0	No	NONE
FBtr0078280	FBgn0037017	3L	A	NTS8	HK2	-	CG4074	4	2.32193	ova_avg	6.52624	0.171697	4.41858	0	No	NONE
FBtr0343101	FBgn0039145	3R	A	NTS8	HK2	+	CG6000	11	3.58496	ova_avg	7.73807	0.171698	5.48991	0	No	NONE
FBtr0076511	FBgn0011787	3L	A	NTS8	HK2	+	mRpL12	97	6.61471	ova_avg	9.36637	0.171716	7.6568	0	No	NONE
FBtr0086170	FBgn0033122	2R	A	NTS8	HK2	+	CG17002	16	4.08746	ova_avg	7.81245	0.172053	6.18025	1	Yes	SAME
FBtr0084356	FBgn0053193	3R	A	NTS8	HK2	-	sav	18	4.24793	ova_avg	7.67925	0.172665	6.44209	0	No	NONE
FBtr0100617	FBgn0037234	3R	A	NTS8	HK2	+	CG9795	15	4	ova_avg	7.81911	0.172766	6.27078	0	No	NONE
FBtr0333818	FBgn0028476	3R	A	NTS8	HK2	+	CG15817	19	4.32193	ova_avg	8.62178	0.172966	4.77902	0	No	NONE
FBtr0076891	FBgn0028648	3L	A	NTS8	HK2	-	mRpL50	35	5.16993	ova_avg	7.88002	0.173069	6.68304	0	No	NONE
FBtr0111285	FBgn0039994	2R	A	NTS8	HK2	+	CG17082	5	2.58496	ova_avg	9.75769	0.173091	5.79587	0	No	NONE
FBtr0100204	FBgn0053095	3R	A	NTS8	HK2	+	CG33095	21	4.45943	ova_avg	9.34233	0.173732	8.45044	0	No	NONE
FBtr0082978	FBgn0038244	3R	A	NTS8	HK2	-	CG7987	9	3.32193	ova_avg	8.06275	0.173753	6.00132	0	No	NONE
FBtr0087891	FBgn0033754	2R	A	NTS8	HK2	-	Ak6	3	2	ova_avg	7.94575	0.174237	5.70246	0	No	NONE
FBtr0076524	FBgn0035960	3L	A	NTS8	HK2	+	CG4942	2	1.58496	ova_avg	6.2756	0.174718	5.34741	1	Yes	SAME
FBtr0083821	FBgn0038747	3R	A	NTS8	HK2	+	RhoGAP92B	123	6.9542	ova_avg	8.91475	0.174831	7.53766	0	No	NONE
FBtr0075428	FBgn0036614	3L	A	NTS8	HK2	-	CG4925	13	3.80735	ova_avg	6.96526	0.174876	6.54436	0	No	NONE
FBtr0082665	FBgn0005355	3R	A	NTS8	HK2	-	Su(fu)	21	4.45943	ova_avg	7.6458	0.175087	5.60735	0	No	NONE
FBtr0330084	FBgn0045862	3R	A	NTS8	HK2	+	btz	13	3.80735	ova_avg	7.82333	0.175234	5.04523	0	No	NONE
FBtr0081832	FBgn0037566	3R	A	NTS8	HK2	+	mRpL1	9	3.32193	ova_avg	8.63871	0.175336	5.83163	0	No	NONE
FBtr0086108	FBgn0029131	2R	A	NTS8	HK2	+	debcl	7	3	ova_avg	8.92734	0.175357	7.11864	0	No	NONE
FBtr0082230	FBgn0037809	3R	A	NTS8	HK2	+	CG12818	17	4.16993	ova_avg	6.63654	0.175581	5.21221	0	No	NONE
FBtr0077616	FBgn0011648	2L	A	NTS8	HK2	-	Mad	9	3.32193	ova_avg	9.03261	0.17567	6.26424	0	No	NONE
FBtr0080033	FBgn0026431	2L	A	NTS8	HK2	+	Grip75	3	2	ova_avg	7.50143	0.175943	7.04796	0	No	NONE
FBtr0331234	FBgn0027515	2L	A	NTS8	HK2	+	CG7115	40	5.35755	ova_avg	9.1332	0.175973	8.05344	0	No	NONE
FBtr0078730	FBgn0037360	3R	A	NTS8	HK2	-	CG2182	47	5.58496	ova_avg	9.41968	0.176086	6.71279	0	No	NONE
FBtr0334903	FBgn0260794	3R	A	NTS8	HK2	-	ctrip	76	6.26679	ova_avg	9.39831	0.176176	7.72036	0	No	NONE
FBtr0083529	FBgn0038546	3R	A	NTS8	HK2	-	CG7379	17	4.16993	ova_avg	8.64277	0.176247	7.16712	0	No	NONE
FBtr0334589	FBgn0021750	3R	A	NTS8	HK2	+	Aats-ser	6	2.80735	ova_avg	7.24025	0.176378	5.02007	0	No	NONE
FBtr0086823	FBgn0034282	2R	A	NTS8	HK2	-	Mapmodulin	112	6.82018	ova_avg	9.20483	0.176425	7.88156	0	No	NONE
FBtr0331654	FBgn0250786	2L	A	NTS8	HK2	-	Chd1	17	4.16993	ova_avg	8.32865	0.176843	6.4657	0	No	NONE
FBtr0071545	FBgn0034578	2R	A	NTS8	HK2	-	CG15653	33	5.08746	ova_avg	6.79931	0.176948	6.61148	0	No	NONE
FBtr0329829	FBgn0250830	2R	A	NTS8	HK2	-	CG12547	5	2.58496	ova_avg	8.24616	0.177039	6.15102	0	No	NONE
FBtr0084290	FBgn0003676	3R	A	NTS8	HK2	-	T-cp1	39	5.32193	ova_avg	10.49	0.177324	8.11331	0	No	NONE
FBtr0075510	FBgn0036546	3L	A	NTS8	HK2	+	elgi	51	5.70044	ova_avg	9.19364	0.177334	8.12678	0	No	NONE
FBtr0302187	FBgn0051158	3R	A	NTS8	HK2	+	Efa6	11	3.58496	ova_avg	8.69327	0.177776	6.10754	0	No	NONE
FBtr0085559	FBgn0039741	3R	A	NTS8	HK2	+	CG7943	2	1.58496	ova_avg	8.667	0.177832	5.01511	1	Yes	SAME
FBtr0087940	FBgn0033752	2R	A	NTS8	HK2	+	CG8569	5	2.58496	ova_avg	6.74157	0.177848	5.20187	0	No	NONE
FBtr0333408	FBgn0017457	2L	A	NTS8	HK2	-	U2af38	41	5.39232	ova_avg	8.4389	0.177929	7.40175	0	No	NONE
FBtr0081384	FBgn0032870	2L	A	NTS8	HK2	+	CG2608	4	2.32193	ova_avg	8.8278	0.178043	5.78192	0	No	NONE
FBtr0075766	FBgn0250848	3L	A	NTS8	HK2	+	26-29-p	161	7.33985	ova_avg	11.2555	0.178431	9.0785	0	No	NONE
FBtr0111245	FBgn0041004	2L	A	NTS8	HK2	+	CG17715	3	2	ova_avg	8.8715	0.178487	5.27948	0	No	NONE
FBtr0087519	FBgn0033899	2R	A	NTS8	HK2	+	CG13016	4	2.32193	ova_avg	7.04912	0.178582	4.51591	0	No	NONE
FBtr0081340	FBgn0032847	2L	A	NTS8	HK2	-	Taf13	18	4.24793	ova_avg	7.6564	0.178669	7.42659	0	No	NONE
FBtr0088441	FBgn0033467	2R	A	NTS8	HK2	-	CG15863	12	3.70044	ova_avg	7.32798	0.178761	5.73316	0	No	NONE
FBtr0088031	FBgn0033653	2R	A	NTS8	HK2	+	CG13192	5	2.58496	ova_avg	7.09272	0.17901	4.79431	0	No	NONE
FBtr0089617	FBgn0003742	2R	A	NTS8	HK2	-	tra2	161	7.33985	ova_avg	8.7464	0.179102	8.61996	0	No	NONE
FBtr0079260	FBgn0031820	2L	A	NTS8	HK2	+	DLP	10	3.45943	ova_avg	8.63809	0.179174	7.66693	0	No	NONE
FBtr0111115	FBgn0033015	2R	A	NTS8	HK2	+	d4	57	5.85798	ova_avg	9.65338	0.179459	9.29513	0	No	NONE
FBtr0081263	FBgn0032812	2L	A	NTS8	HK2	-	Hakai	9	3.32193	ova_avg	7.19035	0.18035	5.29115	0	No	NONE
FBtr0303036	FBgn0035703	3L	A	NTS8	HK2	+	CG8270	4	2.32193	ova_avg	6.84957	0.180384	4.76549	0	No	NONE
FBtr0083843	FBgn0038763	3R	A	NTS8	HK2	-	CG4433	18	4.24793	ova_avg	7.94395	0.180634	6.16845	0	No	NONE
FBtr0333577	FBgn0259824	3L	A	NTS8	HK2	+	Hip14	4	2.32193	ova_avg	7.88592	0.180711	3.85581	0	No	NONE
FBtr0088788	FBgn0021995	2R	A	NTS8	HK2	+	Rs1	9	3.32193	ova_avg	7.71602	0.181361	5.0899	0	No	NONE
FBtr0085837	FBgn0039870	3R	A	NTS8	HK2	+	CG1896	7	3	ova_avg	8.55892	0.181387	5.03407	0	No	NONE
FBtr0084633	FBgn0028471	3R	A	NTS8	HK2	-	Nab2	16	4.08746	ova_avg	8.52621	0.181725	7.1298	0	No	NONE
FBtr0334030	FBgn0003169	3R	A	NTS8	HK2	-	put	3	2	ova_avg	9.84873	0.181732	6.10176	0	No	NONE
FBtr0087582	FBgn0033897	2R	A	NTS8	HK2	-	Rcd1	14	3.90689	ova_avg	8.97789	0.182014	7.59916	0	No	NONE
FBtr0335126	FBgn0031456	2L	A	NTS8	HK2	+	Trn-SR	4	2.32193	ova_avg	7.63083	0.182038	4.40375	0	No	NONE
FBtr0081897	FBgn0051450	3R	A	NTS8	HK2	-	mRpS18A	40	5.35755	ova_avg	9.21194	0.182082	8.01497	0	No	NONE
FBtr0084968	FBgn0039404	3R	A	NTS8	HK2	+	CG14543	108	6.76818	ova_avg	7.49266	0.18218	6.47907	0	No	NONE
FBtr0078554	FBgn0037202	3L	A	NTS8	HK2	+	Ssl1	15	4	ova_avg	7.96677	0.182952	6.92804	0	No	NONE
FBtr0078342	FBgn0037073	3L	A	NTS8	HK2	+	CG7338	8	3.16993	ova_avg	8.57236	0.183732	6.06509	0	No	NONE
FBtr0085175	FBgn0002441	3R	A	NTS8	HK2	-	l(3)mbt	7	3	ova_avg	7.40217	0.184098	6.60446	0	No	NONE
FBtr0087462	FBgn0033971	2R	A	NTS8	HK2	-	CG10209	4	2.32193	ova_avg	8.35843	0.184217	6.26481	0	No	NONE
FBtr0331995	FBgn0032033	2L	A	NTS8	HK2	-	CG13392	2	1.58496	ova_avg	7.69719	0.184539	5.33478	0	No	NONE
FBtr0071996	FBgn0010660	2R	A	NTS8	HK2	-	Nup214	14	3.90689	ova_avg	7.70574	0.18456	6.72211	0	No	NONE
FBtr0071683	FBgn0034646	2R	A	NTS8	HK2	-	Rae1	19	4.32193	ova_avg	8.59996	0.184595	6.69986	0	No	NONE
FBtr0072317	FBgn0035035	2R	A	NTS8	HK2	+	CG3570	6	2.80735	ova_avg	7.61398	0.184604	5.61659	0	No	NONE
FBtr0337042	FBgn0038491	3R	A	NTS8	HK2	+	CG5292	2	1.58496	ova_avg	8.57848	0.184648	6.1067	0	No	NONE
FBtr0072610	FBgn0035153	3L	A	NTS8	HK2	-	ebd1	4	2.32193	ova_avg	7.80132	0.184844	3.94161	0	No	NONE
FBtr0072981	FBgn0035388	3L	A	NTS8	HK2	+	CG2162	92	6.53916	ova_avg	9.22982	0.184983	7.85253	0	No	NONE
FBtr0303028	FBgn0038057	3R	A	NTS8	HK2	+	CG12267	2	1.58496	ova_avg	6.68825	0.184989	3.87096	0	No	NONE
FBtr0076870	FBgn0052380	3L	A	NTS8	HK2	-	SMSr	75	6.24793	ova_avg	8.24677	0.185071	7.06611	0	No	NONE
FBtr0081358	FBgn0032859	2L	A	NTS8	HK2	+	Arpc2	29	4.90689	ova_avg	10.3562	0.185553	6.76614	0	No	NONE
FBtr0086018	FBgn0033062	2R	A	NTS8	HK2	-	Ars2	10	3.45943	ova_avg	8.66427	0.18583	5.47024	0	No	NONE
FBtr0331655	FBgn0032974	2L	A	NTS8	HK2	+	CG3651	9	3.32193	ova_avg	8.99811	0.186474	7.03889	0	No	NONE
FBtr0337044	FBgn0038965	3R	A	NTS8	HK2	+	mats	35	5.16993	ova_avg	8.18769	0.186652	7.47863	0	No	NONE
FBtr0081717	FBgn0037439	3R	A	NTS8	HK2	+	CG10286	9	3.32193	ova_avg	7.9877	0.186699	4.96919	0	No	NONE
FBtr0302549	FBgn0038389	3R	A	NTS8	HK2	+	CG5516	59	5.90689	ova_avg	7.8856	0.186721	6.97947	0	No	NONE
FBtr0076468	FBgn0036004	3L	A	NTS8	HK2	+	Jarid2	1	1	ova_avg	9.21648	0.186902	4.99477	1	Yes	DIFF
FBtr0085357	FBgn0027873	3R	A	NTS8	HK2	+	Cpsf100	3	2	ova_avg	7.16001	0.18693	5.35889	0	No	NONE
FBtr0089007	FBgn0033166	2R	A	NTS8	HK2	-	Eaf	6	2.80735	ova_avg	8.50952	0.187038	6.96059	0	No	NONE
FBtr0084836	FBgn0039337	3R	A	NTS8	HK2	+	MED28	92	6.53916	ova_avg	6.86643	0.187044	6.27462	0	No	NONE
FBtr0080168	FBgn0000018	2L	A	NTS8	HK2	-	abo	7	3	ova_avg	7.39181	0.187909	6.43611	0	No	NONE
FBtr0079084	FBgn0000228	2L	A	NTS8	HK2	-	Bsg25D	3	2	ova_avg	9.43847	0.188058	3.67048	0	No	NONE
FBtr0100407	FBgn0032979	2L	A	NTS8	HK2	-	CG1832	20	4.39232	ova_avg	9.6141	0.188534	8.13026	0	No	NONE
FBtr0083948	FBgn0038805	3R	A	NTS8	HK2	-	TFAM	30	4.9542	ova_avg	8.54914	0.188566	6.41449	0	No	NONE
FBtr0075792	FBgn0036386	3L	A	NTS8	HK2	-	CG8833	8	3.16993	ova_avg	6.25134	0.188784	5.27444	0	No	NONE
FBtr0087206	FBgn0034065	2R	A	NTS8	HK2	+	Rrp42	7	3	ova_avg	7.07941	0.188918	4.54787	0	No	NONE
FBtr0086226	FBgn0034527	2R	A	NTS8	HK2	+	CG9945	15	4	ova_avg	7.49185	0.189003	6.69852	1	Yes	DIFF
FBtr0088628	FBgn0033379	2R	A	NTS8	HK2	-	Mys45A	17	4.16993	ova_avg	7.94074	0.189286	5.57134	0	No	NONE
FBtr0084591	FBgn0005649	3R	A	NTS8	HK2	-	Rox8	13	3.80735	ova_avg	9.45807	0.189289	6.67938	0	No	NONE
FBtr0086892	FBgn0034259	2R	A	NTS8	HK2	-	P32	12	3.70044	ova_avg	10.4954	0.189442	6.93642	0	No	NONE
FBtr0084407	FBgn0039055	3R	A	NTS8	HK2	-	Rassf	8	3.16993	ova_avg	8.49408	0.190151	6.10918	0	No	NONE
FBtr0083126	FBgn0000283	3R	A	NTS8	HK2	-	Cp190	8	3.16993	ova_avg	9.9642	0.190229	6.33225	0	No	NONE
FBtr0088176	FBgn0015582	2R	A	NTS8	HK2	-	dare	4	2.32193	ova_avg	7.24147	0.190485	4.00777	0	No	NONE
FBtr0309848	FBgn0026238	2R	A	NTS8	HK2	-	gus	2	1.58496	ova_avg	11.1956	0.190504	6.25183	1	Yes	SAME
FBtr0084108	FBgn0038869	3R	A	NTS8	HK2	-	CG3353	26	4.75489	ova_avg	7.22669	0.191004	5.95091	0	No	NONE
FBtr0071533	FBgn0034579	2R	A	NTS8	HK2	+	mRpL54	9	3.32193	ova_avg	8.03899	0.191141	4.82326	0	No	NONE
FBtr0081854	FBgn0037578	3R	A	NTS8	HK2	-	CG9601	7	3	ova_avg	7.4404	0.191166	6.23998	0	No	NONE
FBtr0083137	FBgn0051155	3R	A	NTS8	HK2	-	Rpb7	5	2.58496	ova_avg	9.0663	0.191331	7.53719	0	No	NONE
FBtr0078140	FBgn0031238	2L	A	NTS8	HK2	-	CG3645	6	2.80735	ova_avg	7.28994	0.191344	4.54341	0	No	NONE
FBtr0088686	FBgn0033337	2R	A	NTS8	HK2	-	CG8272	21	4.45943	ova_avg	7.34778	0.19211	6.57607	0	No	NONE
FBtr0088425	FBgn0033485	2R	A	NTS8	HK2	-	RpLP0-like	26	4.75489	ova_avg	8.22962	0.192509	5.07463	0	No	NONE
FBtr0071774	FBgn0025186	2R	A	NTS8	HK2	+	ari-2	10	3.45943	ova_avg	8.79862	0.192583	5.96556	0	No	NONE
FBtr0301668	FBgn0034728	2R	A	NTS8	HK2	+	rad50	3	2	ova_avg	8.37911	0.19269	5.52234	0	No	NONE
FBtr0078353	FBgn0037087	3L	A	NTS8	HK2	+	CG7519	19	4.32193	ova_avg	8.85373	0.192737	6.06386	0	No	NONE
FBtr0077484	FBgn0051961	2L	A	NTS8	HK2	-	CG31961	9	3.32193	ova_avg	7.11779	0.192986	5.05421	0	No	NONE
FBtr0082166	FBgn0037741	3R	A	NTS8	HK2	-	CG16908	0	0	ova_avg	5.75941	0.193274	2.07248	0	No	NONE
FBtr0075218	FBgn0052176	3L	A	NTS8	HK2	+	CG32176	17	4.16993	ova_avg	7.79089	0.193404	5.87319	0	No	NONE
FBtr0088880	FBgn0033236	2R	A	NTS8	HK2	-	CG14764	4	2.32193	ova_avg	9.34304	0.193526	5.21056	0	No	NONE
FBtr0331375	FBgn0016978	2L	A	NTS8	HK2	-	snRNP-U1-70K	18	4.24793	ova_avg	8.57188	0.193789	6.73482	0	No	NONE
FBtr0079123	FBgn0014189	2L	A	NTS8	HK2	-	Hel25E	25	4.70044	ova_avg	10.6363	0.19387	7.46931	0	No	NONE
FBtr0083718	FBgn0260779	3R	A	NTS8	HK2	-	gatA	21	4.45943	ova_avg	6.74379	0.193941	6.48918	0	No	NONE
FBtr0074922	FBgn0003744	3L	A	NTS8	HK2	-	trc	20	4.39232	ova_avg	9.10661	0.193944	6.38354	0	No	NONE
FBtr0088831	FBgn0002891	2R	A	NTS8	HK2	+	mus205	2	1.58496	ova_avg	7.16802	0.194121	5.44191	0	No	NONE
FBtr0083238	FBgn0002783	3R	A	NTS8	HK2	-	mor	14	3.90689	ova_avg	9.511	0.194263	6.25646	0	No	NONE
FBtr0075810	FBgn0036373	3L	A	NTS8	HK2	+	CG10741	30	4.9542	ova_avg	7.19934	0.194268	5.41792	0	No	NONE
FBtr0111274	FBgn0261387	2R	A	NTS8	HK2	-	CG17528	9	3.32193	ova_avg	8.65797	0.194789	7.42659	0	No	NONE
FBtr0072904	FBgn0015360	3L	A	NTS8	HK2	-	oxt	12	3.70044	ova_avg	8.40952	0.195156	5.42163	0	No	NONE
FBtr0330678	FBgn0032938	2L	A	NTS8	HK2	+	CG8671	4	2.32193	ova_avg	6.96764	0.19517	5.88993	0	No	NONE
FBtr0089410	FBgn0036039	3L	A	NTS8	HK2	+	Naa60	5	2.58496	ova_avg	8.60499	0.195408	4.19779	0	No	NONE
FBtr0078723	FBgn0037371	3R	A	NTS8	HK2	-	Sym	4	2.32193	ova_avg	7.67255	0.195581	6.21998	0	No	NONE
FBtr0081867	FBgn0010173	3R	A	NTS8	HK2	-	RpA-70	16	4.08746	ova_avg	10.0498	0.195724	8.04776	0	No	NONE
FBtr0084491	FBgn0039125	3R	A	NTS8	HK2	+	Ndc1	12	3.70044	ova_avg	8.06049	0.195755	7.47092	0	No	NONE
FBtr0085857	FBgn0039876	3R	A	NTS8	HK2	-	CG2126	3	2	ova_avg	7.78147	0.196206	6.17527	0	No	NONE
FBtr0084839	FBgn0039336	3R	A	NTS8	HK2	-	CG4553	6	2.80735	ova_avg	6.49382	0.196743	3.72689	1	Yes	SAME
FBtr0080026	FBgn0032250	2L	A	NTS8	HK2	+	holn1	44	5.49185	ova_avg	7.99067	0.196759	7.20384	0	No	NONE
FBtr0078766	FBgn0015402	3R	A	NTS8	HK2	-	ksr	11	3.58496	ova_avg	7.1212	0.196767	5.61701	0	No	NONE
FBtr0083259	FBgn0020407	3R	A	NTS8	HK2	+	asun	3	2	ova_avg	6.16193	0.196963	4.09577	0	No	NONE
FBtr0075051	FBgn0052202	3L	A	NTS8	HK2	+	CG32202	10	3.45943	ova_avg	7.70159	0.19726	5.02088	0	No	NONE
FBtr0333076	FBgn0029148	3L	A	NTS8	HK2	-	NHP2	11	3.58496	ova_avg	10.1048	0.197594	6.45137	0	No	NONE
FBtr0088240	FBgn0010356	2R	A	NTS8	HK2	-	Taf5	2	1.58496	ova_avg	7.37735	0.19776	3.89302	0	No	NONE
FBtr0300881	FBgn0039846	3R	A	NTS8	HK2	-	CG11337	5	2.58496	ova_avg	7.43674	0.198006	5.98317	0	No	NONE
FBtr0083601	FBgn0038593	3R	A	NTS8	HK2	-	CG7146	2	1.58496	ova_avg	6.54564	0.198108	5.2262	0	No	NONE
FBtr0088838	FBgn0003082	2R	A	NTS8	HK2	+	phr	6	2.80735	ova_avg	7.20874	0.19846	5.05284	0	No	NONE
FBtr0301865	FBgn0039234	3R	A	NTS8	HK2	+	nct	17	4.16993	ova_avg	8.5685	0.198552	4.85383	0	No	NONE
FBtr0078537	FBgn0037184	3L	A	NTS8	HK2	-	CG14450	10	3.45943	ova_avg	7.47643	0.198567	5.68433	0	No	NONE
FBtr0076710	FBgn0035872	3L	A	NTS8	HK2	-	CG7185	24	4.64386	ova_avg	9.8703	0.198707	6.97388	0	No	NONE
FBtr0075037	FBgn0036842	3L	A	NTS8	HK2	-	CG3797	2	1.58496	ova_avg	9.28022	0.198937	5.5037	0	No	NONE
FBtr0088983	FBgn0033183	2R	A	NTS8	HK2	-	CG1620	30	4.9542	ova_avg	9.23456	0.199338	7.46596	0	No	NONE
FBtr0335448	FBgn0037926	3R	A	NTS8	HK2	+	Elp1	3	2	ova_avg	6.90775	0.199457	4.5601	0	No	NONE
FBtr0075381	FBgn0036615	3L	A	NTS8	HK2	+	CG4933	2	1.58496	ova_avg	7.48453	0.199478	4.46565	0	No	NONE
FBtr0076678	FBgn0053057	3L	A	NTS8	HK2	-	CG33057	4	2.32193	ova_avg	8.38844	0.199628	8.03753	0	No	NONE
FBtr0082986	FBgn0038235	3R	A	NTS8	HK2	-	CG8461	36	5.20945	ova_avg	7.22266	0.199717	5.89073	0	No	NONE
FBtr0073178	FBgn0003943	3L	A	NTS8	HK2	-	Ubi-p63E	1732	10.7591	tes_avg	11.8214	0.0620791	11.8214	1	Yes	SAME
FBtr0079025	FBgn0031684	2L	A	NTS8	HK2	-	CG8680	354	8.47168	tes_avg	10.7762	0.0746952	10.7762	0	No	NONE
FBtr0072777	FBgn0011573	3L	A	NTS8	HK2	+	Cdc37	206	7.69349	tes_avg	8.97214	0.0801157	8.97214	0	No	NONE
FBtr0335173	FBgn0026479	2L	A	NTS8	HK2	-	Drp1	107	6.75489	tes_avg	9.35352	0.0837507	9.35352	0	No	NONE
FBtr0079297	FBgn0028467	2L	A	NTS8	HK2	+	CG11070	31	5	tes_avg	7.6822	0.0859699	7.6822	0	No	NONE
FBtr0087581	FBgn0040751	2R	A	NTS8	HK2	-	CG13018	18	4.24793	tes_avg	7.8075	0.0903799	7.8075	0	No	NONE
FBtr0077100	FBgn0260936	3L	A	NTS8	HK2	+	scny	27	4.80735	tes_avg	8.49496	0.0957595	8.49496	0	No	NONE
FBtr0072277	FBgn0034986	2R	A	NTS8	HK2	-	mRpS17	52	5.72792	tes_avg	8.07023	0.107213	8.07023	0	No	NONE
FBtr0330181	FBgn0036918	3L	A	NTS8	HK2	+	CG7770	319	8.32193	tes_avg	9.55261	0.107903	9.55261	0	No	NONE
FBtr0074881	FBgn0024889	3L	A	NTS8	HK2	+	Kap-alpha1	46	5.55459	tes_avg	9.30437	0.110087	9.30437	1	Yes	SAME
FBtr0075251	FBgn0036702	3L	A	NTS8	HK2	-	CG6512	104	6.71425	tes_avg	9.63564	0.112214	9.63564	0	No	NONE
FBtr0081640	FBgn0037470	3R	A	NTS8	HK2	-	CG1091	60	5.93074	tes_avg	9.09576	0.116491	9.09576	0	No	NONE
FBtr0303265	FBgn0086371	3R	A	NTS8	HK2	-	poly	52	5.72792	tes_avg	9.40155	0.117576	9.40155	0	No	NONE
FBtr0081098	FBgn0032703	2L	A	NTS8	HK2	+	CG10343	79	6.32193	tes_avg	8.03599	0.121538	8.03599	0	No	NONE
FBtr0076058	FBgn0036239	3L	A	NTS8	HK2	-	Pop2	55	5.80735	tes_avg	9.59713	0.124582	9.59713	0	No	NONE
FBtr0084892	FBgn0039348	3R	A	NTS8	HK2	-	Npl4	77	6.2854	tes_avg	9.00034	0.125397	9.00034	0	No	NONE
FBtr0088889	FBgn0033232	2R	A	NTS8	HK2	-	CG12159	46	5.55459	tes_avg	7.66283	0.128985	7.66283	0	No	NONE
FBtr0072866	FBgn0042712	3L	A	NTS8	HK2	-	HBS1	108	6.76818	tes_avg	8.42016	0.130289	8.42016	0	No	NONE
FBtr0331804	FBgn0035593	3L	A	NTS8	HK2	+	CG4603	76	6.26679	tes_avg	9.35408	0.132864	9.35408	0	No	NONE
FBtr0300130	FBgn0035059	2R	A	NTS8	HK2	+	CG3894	51	5.70044	tes_avg	7.45579	0.133926	7.45579	1	Yes	DIFF
FBtr0078089	FBgn0031253	2L	A	NTS8	HK2	-	CG11885	72	6.18982	tes_avg	8.50847	0.135364	8.50847	0	No	NONE
FBtr0085760	FBgn0086362	3R	A	NTS8	HK2	+	spn-F	191	7.58496	tes_avg	8.09794	0.137311	8.09794	0	No	NONE
FBtr0333487	FBgn0032586	2L	A	NTS8	HK2	+	Tpr2	76	6.26679	tes_avg	9.4493	0.1385	9.4493	0	No	NONE
FBtr0088223	FBgn0033551	2R	A	NTS8	HK2	+	CG7222	96	6.59991	tes_avg	9.39979	0.139988	9.39979	0	No	NONE
FBtr0290266	FBgn0029158	3L	A	NTS8	HK2	-	Las	44	5.49185	tes_avg	8.48952	0.140473	8.48952	0	No	NONE
FBtr0078778	FBgn0037301	3R	A	NTS8	HK2	+	Mms19	18	4.24793	tes_avg	7.4529	0.141365	7.4529	0	No	NONE
FBtr0077980	FBgn0024314	2L	A	NTS8	HK2	-	Plap	75	6.24793	tes_avg	8.78127	0.141546	8.78127	0	No	NONE
FBtr0087293	FBgn0034051	2R	A	NTS8	HK2	-	Mlf	155	7.2854	tes_avg	10.6804	0.141954	10.6804	0	No	NONE
FBtr0337004	FBgn0032261	2L	A	NTS8	HK2	+	CG6094	50	5.67243	tes_avg	7.56804	0.143061	7.56804	0	No	NONE
FBtr0333215	FBgn0036173	3L	A	NTS8	HK2	+	CG7394	70	6.14975	tes_avg	8.7242	0.143327	8.7242	0	No	NONE
FBtr0072516	FBgn0004373	3L	A	NTS8	HK2	-	fwd	20	4.39232	tes_avg	8.71237	0.144387	8.71237	0	No	NONE
FBtr0310370	FBgn0021814	2R	A	NTS8	HK2	-	Vps28	180	7.49985	tes_avg	9.86388	0.148149	9.86388	0	No	NONE
FBtr0303990	FBgn0033889	2R	A	NTS8	HK2	-	CG6701	38	5.2854	tes_avg	8.75117	0.148259	8.75117	0	No	NONE
FBtr0334591	FBgn0038363	3R	A	NTS8	HK2	+	Acyp2	90	6.50779	tes_avg	9.81713	0.149305	9.81713	0	No	NONE
FBtr0072145	FBgn0034936	2R	A	NTS8	HK2	+	CG2970	29	4.90689	tes_avg	8.54786	0.150452	8.54786	0	No	NONE
FBtr0079683	FBgn0032054	2L	A	NTS8	HK2	+	CG13090	33	5.08746	tes_avg	7.18499	0.152039	7.18499	0	No	NONE
FBtr0086580	FBgn0034419	2R	A	NTS8	HK2	+	CG15111	107	6.75489	tes_avg	10.0655	0.15497	10.0655	0	No	NONE
FBtr0079096	FBgn0031711	2L	A	NTS8	HK2	+	CG6907	111	6.80735	tes_avg	9.1717	0.159087	9.1717	1	Yes	SAME
FBtr0302383	FBgn0037446	3R	A	NTS8	HK2	+	Zif	123	6.9542	tes_avg	8.34456	0.159792	8.34456	0	No	NONE
FBtr0331830	FBgn0036484	3L	A	NTS8	HK2	+	Pex3	80	6.33985	tes_avg	8.74351	0.159991	8.74351	0	No	NONE
FBtr0085064	FBgn0039461	3R	A	NTS8	HK2	+	CG5500	156	7.29462	tes_avg	7.6828	0.165707	7.6828	0	No	NONE
FBtr0332198	FBgn0027568	2L	A	NTS8	HK2	-	Cand1	55	5.80735	tes_avg	8.67718	0.166436	8.67718	0	No	NONE
FBtr0339555	FBgn0033672	2R	A	NTS8	HK2	-	rho-7	109	6.78136	tes_avg	8.73412	0.167755	8.73412	0	No	NONE
FBtr0075919	FBgn0036305	3L	A	NTS8	HK2	+	CG10984	36	5.20945	tes_avg	8.19836	0.16819	8.19836	0	No	NONE
FBtr0081838	FBgn0004908	3R	A	NTS8	HK2	+	Arl2	66	6.06609	tes_avg	8.24805	0.168416	8.24805	0	No	NONE
FBtr0073176	FBgn0035473	3L	A	NTS8	HK2	-	mge	369	8.53138	tes_avg	11.2328	0.168866	11.2328	0	No	NONE
FBtr0072128	FBgn0034919	2R	A	NTS8	HK2	+	CG5569	84	6.40939	tes_avg	8.62952	0.170509	8.62952	0	No	NONE
FBtr0075222	FBgn0036728	3L	A	NTS8	HK2	+	CG7580	118	6.89482	tes_avg	10.0137	0.173989	10.0137	1	Yes	SAME
FBtr0075293	FBgn0036685	3L	A	NTS8	HK2	-	CG6664	108	6.76818	tes_avg	8.72132	0.174618	8.72132	0	No	NONE
FBtr0085444	FBgn0086361	3R	A	NTS8	HK2	+	alph	86	6.44294	tes_avg	8.89977	0.176251	8.89977	0	No	NONE
FBtr0300442	FBgn0000447	3R	A	NTS8	HK2	-	Dhod	153	7.26679	tes_avg	10.0841	0.177	10.0841	0	No	NONE
FBtr0299877	FBgn0053170	3L	A	NTS8	HK2	+	CG33170	193	7.59991	tes_avg	9.68151	0.177651	9.68151	0	No	NONE
FBtr0075643	FBgn0036488	3L	A	NTS8	HK2	+	CG6878	171	7.42626	tes_avg	9.73174	0.178388	9.73174	0	No	NONE
FBtr0077916	FBgn0051935	2L	A	NTS8	HK2	-	CG31935	20	4.39232	tes_avg	6.42982	0.178429	6.42982	0	No	NONE
FBtr0085595	FBgn0001280	3R	A	NTS8	HK2	-	janA	324	8.3443	tes_avg	10.0261	0.182276	10.0261	0	No	NONE
FBtr0075329	FBgn0036666	3L	A	NTS8	HK2	+	TSG101	289	8.17991	tes_avg	10.4804	0.182908	10.4804	0	No	NONE
FBtr0089460	FBgn0021760	3L	A	NTS8	HK2	+	chb	110	6.79442	tes_avg	10.4052	0.182933	10.4052	0	No	NONE
FBtr0072558	FBgn0035149	3L	A	NTS8	HK2	-	MED30	25	4.70044	tes_avg	7.42615	0.183744	7.42615	0	No	NONE
FBtr0086149	FBgn0026761	2R	A	NTS8	HK2	-	Trap1	110	6.79442	tes_avg	8.92523	0.184211	8.92523	0	No	NONE
FBtr0078994	FBgn0031657	2L	A	NTS8	HK2	+	CG3756	37	5.24793	tes_avg	7.96711	0.18425	7.96711	0	No	NONE
FBtr0083505	FBgn0038515	3R	A	NTS8	HK2	-	CG5823	220	7.7879	tes_avg	10.5153	0.18532	10.5153	0	No	NONE
FBtr0337016	FBgn0038428	3R	A	NTS8	HK2	-	CG14894	120	6.91886	tes_avg	8.50789	0.186021	8.50789	0	No	NONE
FBtr0079987	FBgn0032214	2L	A	NTS8	HK2	+	CG4968	134	7.07682	tes_avg	9.93729	0.18634	9.93729	0	No	NONE
FBtr0087902	FBgn0033716	2R	A	NTS8	HK2	+	Den1	274	8.10329	tes_avg	8.97661	0.188769	8.97661	0	No	NONE
FBtr0088451	FBgn0033460	2R	A	NTS8	HK2	-	sec24	37	5.24793	tes_avg	9.20558	0.188834	9.20558	0	No	NONE
FBtr0080525	FBgn0032516	2L	A	NTS8	HK2	-	CG9293	64	6.02237	tes_avg	8.04609	0.189372	8.04609	0	No	NONE
FBtr0082367	FBgn0037878	3R	A	NTS8	HK2	-	CG6693	138	7.11894	tes_avg	8.99322	0.191426	8.99322	0	No	NONE
FBtr0305998	FBgn0040237	3R	A	NTS8	HK2	-	bor	194	7.60733	tes_avg	9.20909	0.192507	9.20909	0	No	NONE
FBtr0076267	FBgn0026160	3L	A	NTS8	HK2	+	tna	34	5.12928	tes_avg	9.71023	0.192829	9.71023	0	No	NONE
FBtr0082591	FBgn0038049	3R	A	NTS8	HK2	+	CG5844	76	6.26679	tes_avg	8.70231	0.192876	8.70231	0	No	NONE
FBtr0088919	FBgn0050491	2R	A	NTS8	HK2	+	CG30491	43	5.45943	tes_avg	8.69082	0.1948	8.69082	1	Yes	SAME
FBtr0340541	FBgn0032445	2L	A	NTS8	HK2	+	CG6153	36	5.20945	tes_avg	8.53097	0.195692	8.53097	0	No	NONE
FBtr0072451	FBgn0050428	2R	A	NTS8	HK2	+	CG30428	19	4.32193	tes_avg	8.06504	0.19681	8.06504	0	No	NONE
FBtr0332058	FBgn0035437	3L	A	NTS8	HK2	-	CG11526	74	6.22882	tes_avg	9.76244	0.197716	9.76244	0	No	NONE
FBtr0335190	FBgn0031997	2L	A	NTS8	HK2	+	CG8455	29	4.90689	tes_avg	8.59863	0.19778	8.59863	0	No	NONE
[truncated: 13,158 more rows]

## Sheet: motif_hits
sequence_name	FBgn	chrom	XA	gn_strand	tau	tissue_max_exp_FlyAtlas	tes_exp_FlyAtlas	RPKM_testis	log(RPKM_testis)	motif_start	motif_stop	motif_strand	motif_midpt	midpt_coord_rel_to_TSS	fimo_score	fimo_p-value	fimo_q-value	matched sequence	midpt_0m80	XA	strand_SD
FBgn0000015-3R-12797907-12798207-.fasta	FBgn0000015	3R	A	-	0.593957	ejd_avg	5.55797	1	1	80	98	-	89	-39	10.8742	5.22e-05	0.511	GTGAGTGGGCCATGCGATT	Y	A	SAME
FBgn0000037-2R-20277184-20277484-.fasta	FBgn0000037	2R	A	-	0.873277	abr_avg	0	1	1	71	89	+	80	-30	11.1044	4.63e-05	0.49	TGTAACTGGCTTTGTTTTT	Y	A	DIFF
FBgn0000037-2R-20277184-20277484-.fasta	FBgn0000037	2R	A	-	0.873277	abr_avg	0	1	1	199	217	+	208	-158	12.946	1.66e-05	0.35	AAAAGTATGCTTTGTAATT	N	A	DIFF
FBgn0000152-X-16577877-16578177-.fasta	FBgn0000152	X	X	-	0.315774	lsg_avg	0.86766	1	1	220	238	-	229	-179	14.9027	4.77e-06	0.219	TTTAGCAGTCTATGATTTT	N	X	SAME
FBgn0000227-2L-4684408-4684708-.fasta	FBgn0000227	2L	A	-	NA	NA	NA	0	0	170	188	+	179	-129	10.0685	7.84e-05	0.562	TGCAGCTGTCGTTCCATTT	N	A	DIFF
FBgn0000256-2L-3880016-3880316-.fasta	FBgn0000256	2L	A	-	0.375309	tes_avg	10.0091	72	6.18982	202	220	-	211	-161	9.95339	8.3e-05	0.562	TTTAGTTTGCTCTGCCATG	N	A	SAME
FBgn0000326-2R-17506533-17506833-.fasta	FBgn0000326	2R	A	-	0.193636	afb_avg	2.91958	1	1	263	281	-	272	-222	10.4138	6.6e-05	0.543	TAAAGTTGGCAGTTTTATT	N	A	SAME
FBgn0000358-3L-8722714-8723014+.fasta	FBgn0000358	3L	A	+	0.931217	ova_avg	0	0	0	229	247	+	238	-13	11.795	3.2e-05	0.442	AGAAGTGTGCTTGGCCATT	Y	A	SAME
FBgn0000500-3R-15931-16231-.fasta	FBgn0000500	3R	A	-	0.913367	abr_avg	0	0	0	59	77	+	68	-18	11.9101	3e-05	0.431	CTAAGTTGGCGCTTCCTTT	Y	A	DIFF
FBgn0000552-3R-2509922-2510222+.fasta	FBgn0000552	3R	A	+	1	acg_avg	0	0	0	91	109	-	100	-151	10.2987	7e-05	0.547	CTTAATTGGCGTTGAGATG	N	A	DIFF
FBgn0000577-2R-7415664-7415964-.fasta	FBgn0000577	2R	A	-	0.759985	ejd_avg	0	1	1	244	262	+	253	-203	11.795	3.2e-05	0.442	GCGAGTAGGCCAGGAAAAT	N	A	DIFF
FBgn0000615-2R-16558215-16558515-.fasta	FBgn0000615	2R	A	-	0.921193	tes_avg	11.7301	674	9.39874	135	153	-	144	-94	15.0178	4.41e-06	0.219	ATTAGCAGGCTTTGCATAT	N	A	SAME
FBgn0000719-X-22256979-22257279-.fasta	FBgn0000719	X	X	-	0.250688	lfb_avg	3.57563	1	1	248	266	+	257	-207	10.4138	6.6e-05	0.543	CTCAGTTTTCATTGCTCTT	N	X	DIFF
FBgn0001124-2R-12025606-12025906+.fasta	FBgn0001124	2R	A	+	0.105369	ahg_avg	10.2041	274	8.10329	193	211	+	202	-49	15.1329	4.07e-06	0.215	TTAAACTGGCCTTGATATT	Y	A	SAME
FBgn0001133-2R-16899375-16899675-.fasta	FBgn0001133	2R	A	-	0.125421	ova_avg	4.7453	30	4.9542	5	23	+	14	37	9.95339	8.3e-05	0.562	AAAAGTAGTCATTTACATA	N	A	DIFF
FBgn0001137-2L-8433547-8433847-.fasta	FBgn0001137	2L	A	-	0.480792	acr_avg	4.01067	1	1	269	287	-	278	-228	10.9893	4.92e-05	0.503	AGAAGTATGCAGTGAAAAG	N	A	SAME
FBgn0001219-3R-11068158-11068458+.fasta	FBgn0001219	3R	A	+	0.0437627	lsg_avg	11.1989	990	9.95274	140	158	+	149	-102	9.72319	9.27e-05	0.577	TTAGGGTGGCCAAGAATTT	N	A	SAME
FBgn0001220-2R-10143646-10143946-.fasta	FBgn0001220	2R	A	-	0.0742291	afb_avg	9.84294	208	7.70736	57	75	-	66	-16	10.644	5.88e-05	0.534	TCTAGTTTGCTTTCATTTA	Y	A	SAME
FBgn0001233-3L-3192718-3193018+.fasta	FBgn0001233	3L	A	+	0.0891105	lsg_avg	11.2954	1193	10.2216	259	277	+	268	18	11.3346	4.1e-05	0.469	CCCAGTGGGCTTTGCTCAA	N	A	SAME
FBgn0001254-3L-3512630-3512930-.fasta	FBgn0001254	3L	A	-	0.812426	lhg_avg	0	0	0	227	245	+	236	-186	11.1044	4.63e-05	0.49	CCAAGTTGGTCTTGCATTG	N	A	DIFF
FBgn0001255-3R-3855217-3855517-.fasta	FBgn0001255	3R	A	-	0.706768	asg_avg	3.76488	1	1	85	103	+	94	-44	13.7517	1.01e-05	0.288	TGTAGTTGGCTCTGCATCT	Y	A	DIFF
FBgn0001281-3R-25864399-25864699-.fasta	FBgn0001281	3R	A	-	0.880868	tes_avg	11.2394	670	9.39017	104	122	-	113	-63	12.6007	2.03e-05	0.374	TCCTGTGTGCCATGATTTT	Y	A	SAME
FBgn0001311-3R-1218536-1218836-.fasta	FBgn0001311	3R	A	-	0.820929	ltr_avg	5.35712	2	1.58496	258	276	+	267	-217	10.1836	7.41e-05	0.557	GAAAGTTTTCCTAGAAATT	N	A	DIFF
FBgn0001612-X-13638665-13638965-.fasta	FBgn0001612	X	X	-	0.263746	ova_avg	6.07763	2	1.58496	112	130	+	121	-71	13.8668	9.42e-06	0.274	TGCAATAGGCTATGCCATT	Y	X	DIFF
FBgn0002022-2L-19041611-19041911+.fasta	FBgn0002022	2L	A	+	0.18538	lsg_avg	8.19649	39	5.32193	96	114	+	105	-146	10.4138	6.6e-05	0.543	TTTTGTAAGCATTGACTTG	N	A	SAME
FBgn0002534-2R-4322564-4322864+.fasta	FBgn0002534	2R	A	+	0.91508	ltr_avg	0	0	0	167	185	+	176	-75	14.4423	6.49e-06	0.246	TCCGGTTTGCTTTGCATTT	Y	A	SAME
FBgn0002609-3R-21847294-21847594+.fasta	FBgn0002609	3R	A	+	0.622744	ltr_avg	2.45044	1	1	246	264	+	255	5	9.72319	9.27e-05	0.577	ACTAGTTTGCCACTCATTT	N	A	SAME
FBgn0002673-2L-16261826-16262126-.fasta	FBgn0002673	2L	A	-	0.647499	ova_avg	5.25301	55	5.80735	84	102	-	93	-43	12.1403	2.64e-05	0.414	TTAAGATGGCTGCGCTTTT	Y	A	SAME
FBgn0002709-X-17036900-17037200-.fasta	FBgn0002709	X	X	-	NA	NA	NA	33	5.08746	199	217	-	208	-158	9.60809	9.8e-05	0.582	TGTAGGAGGCTAGTCATTA	N	X	SAME
FBgn0002862-3R-9653381-9653681-.fasta	FBgn0002862	3R	A	-	0.948743	tes_avg	11.5642	3357	11.7134	51	69	-	60	-10	9.60809	9.8e-05	0.582	TATAGTATCCTTTGCCTCT	Y	A	SAME
FBgn0002865-3R-24116809-24117109+.fasta	FBgn0002865	3R	A	+	0.898042	tes_avg	11.833	719	9.49185	35	53	+	44	-207	9.72319	9.27e-05	0.577	AGCAGCGTTCTGTGATTTT	N	A	SAME
FBgn0002865-3R-24116809-24117109+.fasta	FBgn0002865	3R	A	+	0.898042	tes_avg	11.833	719	9.49185	206	224	+	215	-36	16.8594	1.12e-06	0.118	CGAAGTGGGCCTGGATTAT	Y	A	SAME
FBgn0002909-3L-7321981-7322281+.fasta	FBgn0002909	3L	A	+	NA	NA	NA	11	3.58496	94	112	+	103	-148	14.9027	4.77e-06	0.219	TTTAGTAAGCCATGATTAT	N	A	SAME
FBgn0003002-3R-678284-678584+.fasta	FBgn0003002	3R	A	+	0.790301	lcns_avg	0	0	0	105	123	-	114	-137	11.3346	4.1e-05	0.469	GCGAGCAGGCCAGGCGTAT	N	A	DIFF
FBgn0003046-2L-7021431-7021731+.fasta	FBgn0003046	2L	A	+	0.807333	ltr_avg	1.69058	5	2.58496	242	260	+	251	1	10.2987	7e-05	0.547	AGAAGCAGGCAAGCAGTTT	N	A	SAME
FBgn0003074-2R-4801523-4801823-.fasta	FBgn0003074	2R	A	-	0.146465	asg_avg	9.54327	281	8.13955	106	124	+	115	-65	9.83829	8.77e-05	0.574	GTCAGGTGTCAATGACTAT	Y	A	DIFF
FBgn0003086-X-3143271-3143571-.fasta	FBgn0003086	X	X	-	0.989806	lsg_avg	0	0	0	216	234	-	225	-175	9.95339	8.3e-05	0.562	TCCAGTTACCCTGTCATTT	N	X	SAME
FBgn0003124-3L-20302503-20302803+.fasta	FBgn0003124	3L	A	+	0.780074	ova_avg	9.32451	40	5.35755	208	226	+	217	-34	14.3272	7e-06	0.255	CATAGAAGGCTTTGAGATA	Y	A	SAME
FBgn0003145-2L-12085327-12085627-.fasta	FBgn0003145	2L	A	-	0.931481	acg_avg	4.63268	7	3	40	58	+	49	2	9.95339	8.3e-05	0.562	TCAACTAGGCTTTGATATT	N	A	DIFF
FBgn0003256-2RHet-197925-198225+.fasta	FBgn0003256	2RHet	A	+	NA	NA	NA	1	1	193	211	+	202	-49	9.83829	8.77e-05	0.574	TTTAGTTAGCTGTACATTT	Y	A	SAME
FBgn0003267-3R-22706842-22707142-.fasta	FBgn0003267	3R	A	-	NA	NA	NA	0	0	134	152	-	143	-93	9.72319	9.27e-05	0.577	CGTAATTTGCTTTGTTTTT	N	A	SAME
FBgn0003279-3R-23748292-23748592+.fasta	FBgn0003279	3R	A	+	0.0826703	asg_avg	9.74433	299	8.22882	19	37	-	28	-223	9.83829	8.77e-05	0.574	ATAAATTAGCAATGCGTTT	N	A	DIFF
FBgn0003292-3L-11580819-11581119-.fasta	FBgn0003292	3L	A	-	0.816563	ova_avg	0	0	0	157	175	-	166	-116	11.6799	3.4e-05	0.446	TCTAATTTGCAGTGAGTTT	N	A	SAME
FBgn0003310-2L-1077760-1078060-.fasta	FBgn0003310	2L	A	-	0.387206	ova_avg	1.98172	16	4.08746	180	198	-	189	-139	10.5289	6.23e-05	0.537	GTCAGTTTGCAGTGCGATA	N	A	SAME
FBgn0003372-2L-4937158-4937458+.fasta	FBgn0003372	2L	A	+	NA	NA	NA	0	0	229	247	-	238	-13	9.72319	9.27e-05	0.577	TAAAATAAGCAATGCGTAT	Y	A	DIFF
FBgn0003374-X-3143283-3143583+.fasta	FBgn0003374	X	X	+	0.949302	lsg_avg	0	2	1.58496	204	222	-	213	-38	9.95339	8.3e-05	0.562	TCCAGTTACCCTGTCATTT	Y	X	DIFF
FBgn0003410-3L-16846600-16846900+.fasta	FBgn0003410	3L	A	+	0.192927	lcns_avg	4.70717	100	6.65821	190	208	+	199	-52	11.9101	3e-05	0.431	ACCAGGAGGCACTGCGATG	Y	A	SAME
FBgn0003462-3L-11106789-11107089-.fasta	FBgn0003462	3L	A	-	0.102735	aht_avg	9.11358	106	6.74147	227	245	+	236	-186	12.7158	1.9e-05	0.362	CACAAATGGCGTTGAATTT	N	A	DIFF
FBgn0003502-2L-8300695-8300995-.fasta	FBgn0003502	2L	A	-	0.35153	lcns_avg	4.04844	1	1	167	185	+	176	-126	10.8742	5.22e-05	0.511	CGTAGGATTCCTGGAATTC	N	A	DIFF
FBgn0003520-2R-14011327-14011627-.fasta	FBgn0003520	2R	A	-	0.251638	aeye_avg	4.82467	4	2.32193	70	88	+	79	-29	10.1836	7.41e-05	0.557	AGCAGTTTGCAGAGAGTTT	Y	A	DIFF
FBgn0003731-2R-17409674-17409974+.fasta	FBgn0003731	2R	A	+	0.353082	afb_avg	0	1	1	84	102	-	93	-158	12.0252	2.81e-05	0.43	TCAAGTTGCCAATTACTTT	N	A	DIFF
FBgn0003889-3R-5235953-5236253-.fasta	FBgn0003889	3R	A	-	0.90335	tes_avg	11.6304	1709	10.7398	240	258	+	249	-199	9.83829	8.77e-05	0.574	CATGGATGTCCTGGATTTT	N	A	DIFF
FBgn0003900-2R-18933380-18933680+.fasta	FBgn0003900	2R	A	+	0.786895	tes_avg	6.54103	19	4.32193	217	235	-	226	-25	10.644	5.88e-05	0.534	TGAAGAGAGCCTTGACTCG	Y	A	DIFF
FBgn0003943-3L-3902869-3903169-.fasta	FBgn0003943	3L	A	-	0.0620791	tes_avg	11.8214	1732	10.7591	105	123	-	114	-64	16.7443	1.23e-06	0.119	CAAAGGTGGCATTGCATTC	Y	A	SAME
FBgn0004034-X-250291-250591+.fasta	FBgn0004034	X	X	+	0.991301	lsg_avg	0	0	0	74	92	+	83	-168	9.60809	9.8e-05	0.582	CAAAGTTGGCCGATCTATG	N	X	SAME
FBgn0004057-X-19561082-19561382+.fasta	FBgn0004057	X	X	+	0.341069	acr_avg	7.64511	29	4.90689	186	204	-	195	-56	12.1403	2.64e-05	0.414	CCAAGCAAGCACTGCCAAT	Y	X	DIFF
FBgn0004167-3L-3336609-3336909+.fasta	FBgn0004167	3L	A	+	0.266825	amg_avg	2.91562	1	1	144	162	-	153	-98	10.0685	7.84e-05	0.562	TGCAGTTATCGATGCTTAT	N	A	DIFF
FBgn0004171-3R-24118269-24118569+.fasta	FBgn0004171	3R	A	+	0.967398	tes_avg	11.2543	853	9.73809	191	209	+	200	-51	17.3198	7.72e-07	0.0964	AATAGTAGGCCTTGCCTCT	Y	A	SAME
FBgn0004172-3R-3191321-3191621+.fasta	FBgn0004172	3R	A	+	0.898781	tes_avg	11.2796	767	9.58496	103	121	-	112	-139	9.95339	8.3e-05	0.562	TCTAGTTAGCTATGGATAT	N	A	DIFF
FBgn0004172-3R-3191321-3191621+.fasta	FBgn0004172	3R	A	+	0.898781	tes_avg	11.2796	767	9.58496	177	195	+	186	-65	10.4138	6.6e-05	0.543	TCATATTAGCCTTGAAATT	Y	A	SAME
FBgn0004173-3R-3191298-3191598-.fasta	FBgn0004173	3R	A	-	0.881172	tes_avg	11.7149	3767	11.8796	126	144	-	135	-85	9.95339	8.3e-05	0.562	TCTAGTTAGCTATGGATAT	N	A	SAME
FBgn0004173-3R-3191298-3191598-.fasta	FBgn0004173	3R	A	-	0.881172	tes_avg	11.7149	3767	11.8796	200	218	+	209	-159	10.4138	6.6e-05	0.543	TCATATTAGCCTTGAAATT	N	A	DIFF
FBgn0004174-3R-3190344-3190644-.fasta	FBgn0004174	3R	A	-	0.737386	tes_avg	11.6123	1905	10.8963	125	143	-	134	-84	11.1044	4.63e-05	0.49	CATAGTAGGCTATGGAAAT	N	A	SAME
FBgn0004175-3R-3189444-3189744-.fasta	FBgn0004175	3R	A	-	0.934308	tes_avg	11.3023	808	9.66	85	103	-	94	-44	15.9386	2.28e-06	0.171	TCTAGAAGGCTTTGAATCT	Y	A	SAME
FBgn0004177-2L-7827492-7827792+.fasta	FBgn0004177	2L	A	+	0.0768662	lcns_avg	7.4104	51	5.70044	246	264	+	255	5	11.3346	4.1e-05	0.469	TCAAGCATGCATCGCTAAT	N	A	SAME
FBgn0004227-X-16255351-16255651+.fasta	FBgn0004227	X	X	+	0.235698	abr_avg	4.97072	3	2	225	243	+	234	-17	14.097	8.13e-06	0.265	CCAAGTAGGCATTGTGTCA	Y	X	SAME
FBgn0004378-3L-1245859-1246159-.fasta	FBgn0004378	3L	A	-	0.803788	ova_avg	6.2981	9	3.32193	10	28	+	19	32	11.5648	3.62e-05	0.448	TTCAGTTGTCCGTTCAATT	N	A	DIFF
FBgn0004401-3L-17638085-17638385-.fasta	FBgn0004401	3L	A	-	0.15769	lcns_avg	8.47186	92	6.53916	144	162	+	153	-103	12.7158	1.9e-05	0.362	TCTAGATGGCAGTGCGATA	N	A	DIFF
FBgn0004456-X-13152472-13152772-.fasta	FBgn0004456	X	X	-	0.257812	aht_avg	4.20463	1	1	109	127	-	118	-68	16.9745	1.02e-06	0.118	TCCAGTAGTCATTGAGTTA	Y	X	SAME
FBgn0004456-X-13152472-13152772-.fasta	FBgn0004456	X	X	-	0.257812	aht_avg	4.20463	1	1	156	174	-	165	-115	11.1044	4.63e-05	0.49	TCTAGTGTGCGAGGAAATT	N	X	SAME
FBgn0004463-2R-7926344-7926644+.fasta	FBgn0004463	2R	A	+	0.161394	lcns_avg	4.42936	3	2	138	156	-	147	-104	12.946	1.66e-05	0.35	TAGAGCTGGCAGTGAAATT	N	A	DIFF
FBgn0004622-3R-25795118-25795418-.fasta	FBgn0004622	3R	A	-	0.645189	abr_avg	0	0	0	83	101	-	92	-42	9.83829	8.77e-05	0.574	TCCGGCTGGCATTCAGTTT	Y	A	SAME
FBgn0004643-X-2497979-2498279+.fasta	FBgn0004643	X	X	+	0.276754	ova_avg	4.17555	5	2.58496	140	158	-	149	-102	12.1403	2.64e-05	0.414	TCTAGGTAGCTTTTATTTT	N	X	DIFF
FBgn0004646-X-6875680-6875980-.fasta	FBgn0004646	X	X	-	0.277818	lcns_avg	6.52795	13	3.80735	154	172	+	163	-113	13.0611	1.55e-05	0.344	AACAGCTGGCTATGAAACT	N	X	DIFF
FBgn0004855-3R-10134546-10134846+.fasta	FBgn0004855	3R	A	+	0.123384	lsg_avg	6.72991	35	5.16993	111	129	-	120	-131	10.4138	6.6e-05	0.543	TAAAGAATGCATTTATTTG	N	A	DIFF
FBgn0004865-3L-21219458-21219758+.fasta	FBgn0004865	3L	A	+	0.822234	lfb_avg	0	0	0	83	101	-	92	-159	9.83829	8.77e-05	0.574	AATAGAATGCATTGCGTCT	N	A	DIFF
FBgn0004875-3L-3818428-3818728+.fasta	FBgn0004875	3L	A	+	0.260156	abr_avg	4.41726	21	4.45943	84	102	-	93	-158	12.946	1.66e-05	0.35	TATGGTAAGCATTGCTTTT	N	A	DIFF
FBgn0004897-3R-20908155-20908455+.fasta	FBgn0004897	3R	A	+	NA	NA	NA	0	0	251	269	-	260	10	11.2195	4.36e-05	0.483	CACAGTGAGCAATGCAATC	N	A	DIFF
FBgn0005626-3L-6712574-6712874-.fasta	FBgn0005626	3L	A	-	0.925458	abr_avg	0	2	1.58496	37	55	-	46	5	13.6366	1.09e-05	0.296	TGAAGCATGCATTGATTCG	N	A	SAME
FBgn0005771-2L-14490608-14490908+.fasta	FBgn0005771	2L	A	+	0.174684	lcns_avg	4.96018	1	1	120	138	+	129	-122	10.4138	6.6e-05	0.543	TGCAGCAGGCGGTGCTCCT	N	A	SAME
FBgn0005775-3L-5078982-5079282-.fasta	FBgn0005775	3L	A	-	0.740786	abr_avg	0	0	0	59	77	+	68	-18	10.644	5.88e-05	0.534	GCAAGTTGGCCAAGCCAAA	Y	A	DIFF
FBgn0005777-3R-5573346-5573646+.fasta	FBgn0005777	3R	A	+	0.126244	ova_avg	7.15575	29	4.90689	263	281	+	272	22	10.1836	7.41e-05	0.557	ATAAGTTTGCCTTTTCTTT	N	A	SAME
FBgn0010019-X-363317-363617-.fasta	FBgn0010019	X	X	-	0.626863	aht_avg	4.71161	485	8.92481	264	282	+	273	-223	13.0611	1.55e-05	0.344	CGTGGTTGTCTTTGATTTT	N	X	DIFF
FBgn0010198-X-13231620-13231920-.fasta	FBgn0010198	X	X	-	NA	NA	NA	182	7.5157	229	247	+	238	-188	13.6366	1.09e-05	0.296	AGAAGTAATCTTTGATATT	N	X	DIFF
FBgn0010226-2R-12984890-12985190-.fasta	FBgn0010226	2R	A	-	0.252009	lfb_avg	11.2237	1376	10.4273	237	255	+	246	-196	13.1762	1.44e-05	0.333	TCCAGTGGGCGTTGAAAAG	N	A	DIFF
FBgn0010240-X-15818887-15819187+.fasta	FBgn0010240	X	X	+	0.855325	abr_avg	0	1	1	27	45	+	36	-215	10.5289	6.23e-05	0.537	CAAAGCTTTCCGTGAGCTT	N	X	SAME
FBgn0010316-2R-5599575-5599875+.fasta	FBgn0010316	2R	A	+	0.347039	ova_avg	5.49158	5	2.58496	191	209	+	200	-51	13.4064	1.25e-05	0.313	TCCAGTTGGCAACGCCTCT	Y	A	SAME
FBgn0010403-3R-1802488-1802788-.fasta	FBgn0010403	3R	A	-	0.987421	aeye_avg	0.755129	0	0	237	255	-	246	-196	11.3346	4.1e-05	0.469	GCCAGCTGGCTATCAATTG	N	A	SAME
FBgn0010470-2R-17385383-17385683-.fasta	FBgn0010470	2R	A	-	0.193921	fsv_avg	5.96877	18	4.24793	113	131	-	122	-72	11.6799	3.4e-05	0.446	AAAAGTAGGCGAGGCATAA	Y	A	SAME
FBgn0010747-3L-5145527-5145827+.fasta	FBgn0010747	3L	A	+	0.158701	asg_avg	8.3101	50	5.67243	17	35	-	26	-225	9.83829	8.77e-05	0.574	AAAAGTTATCATTGCCAAT	N	A	DIFF
FBgn0010747-3L-5145527-5145827+.fasta	FBgn0010747	3L	A	+	0.158701	asg_avg	8.3101	50	5.67243	205	223	+	214	-37	10.7591	5.54e-05	0.524	GATAGCGGGCTTTGTTTTG	Y	A	SAME
FBgn0010830-3L-22734437-22734737-.fasta	FBgn0010830	3L	A	-	0.201646	ova_avg	5.31325	6	2.80735	54	72	-	63	-13	10.2987	7e-05	0.547	CACAGCTGCCCACGACTTA	Y	A	SAME
FBgn0010905-3L-2554241-2554541-.fasta	FBgn0010905	3L	A	-	0.334762	abr_avg	4.46624	5	2.58496	247	265	+	256	-206	13.5215	1.17e-05	0.305	CTAAACTGGCATTGCTTTG	N	A	DIFF
FBgn0011284-3L-13034605-13034905+.fasta	FBgn0011284	3L	A	+	0.0916698	asg_avg	9.80437	88	6.47573	254	272	-	263	13	10.5289	6.23e-05	0.537	GGCAGTTGGCGTCGAATAA	N	A	DIFF
FBgn0011291-2L-9763211-9763511-.fasta	FBgn0011291	2L	A	-	NA	NA	NA	27	4.80735	130	148	+	139	-89	15.0178	4.41e-06	0.219	ATAAGGTGGCTTTGAGATT	N	A	DIFF
FBgn0011293-3L-17016790-17017090-.fasta	FBgn0011293	3L	A	-	0.994184	aeye_avg	0	0	0	62	80	+	71	-21	10.1836	7.41e-05	0.557	ATTAGCAATCCGGGCTTTT	Y	A	DIFF
FBgn0011327-3L-9470014-9470314-.fasta	FBgn0011327	3L	A	-	0.306969	tes_avg	9.65768	163	7.35755	58	76	-	67	-17	12.7158	1.9e-05	0.362	AGCAGTAGGCCACTCATTT	Y	A	SAME
FBgn0011586-X-8800230-8800530-.fasta	FBgn0011586	X	X	-	0.148374	aeye_avg	7.79143	39	5.32193	148	166	-	157	-107	9.60809	9.8e-05	0.582	CACAATTGTCATTTAATTT	N	X	SAME
FBgn0011606-X-2498034-2498334-.fasta	FBgn0011606	X	X	-	0.481436	tes_avg	9.16424	58	5.88264	85	103	-	94	-44	12.1403	2.64e-05	0.414	TCTAGGTAGCTTTTATTTT	Y	X	SAME
FBgn0011766-3R-17463782-17464082-.fasta	FBgn0011766	3R	A	-	NA	NA	NA	8	3.16993	264	282	+	273	-223	12.8309	1.77e-05	0.357	GCAAGCGGGCGTTTACTTT	N	A	DIFF
FBgn0013746-2L-8997328-8997628-.fasta	FBgn0013746	2L	A	-	0.0933456	ltu_avg	8.04143	17	4.16993	214	232	-	223	-173	11.9101	3e-05	0.431	GAAAGCAGTCACGGAATTT	N	A	SAME
FBgn0015025-3L-15809828-15810128+.fasta	FBgn0015025	3L	A	+	0.293981	ova_avg	5.13964	4	2.32193	257	275	-	266	16	12.2554	2.47e-05	0.409	GCAAGTAATCAATGATTTC	N	A	DIFF
FBgn0015034-2R-4334705-4335005+.fasta	FBgn0015034	2R	A	+	0.651148	acg_avg	0	2	1.58496	142	160	-	151	-100	11.1044	4.63e-05	0.49	AGAAGCAGCCTATGACTAT	N	A	DIFF
FBgn0015221-3R-26213275-26213575+.fasta	FBgn0015221	3R	A	+	0.101155	aht_avg	10.1995	317	8.31288	99	117	+	108	-143	13.9819	8.76e-06	0.272	TTAAATAGGCGTTGAAATT	N	A	SAME
FBgn0015221-3R-26213275-26213575+.fasta	FBgn0015221	3R	A	+	0.101155	aht_avg	10.1995	317	8.31288	151	169	-	160	-91	12.0252	2.81e-05	0.43	TGAAGCAGGCGACGCCTTC	N	A	DIFF
FBgn0015230-3R-12613782-12614082+.fasta	FBgn0015230	3R	A	+	0.965232	tes_avg	8.67185	24	4.64386	225	243	+	234	-17	10.0685	7.84e-05	0.562	CGAAACTGTCCTTAAATTT	Y	A	SAME
FBgn0015247-2R-11822279-11822579-.fasta	FBgn0015247	2R	A	-	0.107248	atg_avg	9.07458	31	5	78	96	-	87	-37	9.95339	8.3e-05	0.562	AATAGTTGGCTGTTATATG	Y	A	SAME
FBgn0015279-3R-16460403-16460703-.fasta	FBgn0015279	3R	A	-	0.112159	ova_avg	6.51759	5	2.58496	272	290	-	281	-231	10.9893	4.92e-05	0.503	TTTTGTATGCTATGATTTT	N	A	SAME
FBgn0015300-2R-20387703-20388003-.fasta	FBgn0015300	2R	A	-	0.972286	tes_avg	8.69908	79	6.32193	211	229	-	220	-170	13.0611	1.55e-05	0.344	CCAAGAAAGCCAGGCTTCT	N	A	SAME
FBgn0015521-2L-2855819-2856119+.fasta	FBgn0015521	2L	A	+	0.0961965	asg_avg	10.3847	248	7.96	281	299	+	290	40	10.9893	4.92e-05	0.503	TCCAGCTGTCATTTCTTTC	N	A	SAME
FBgn0015542-3R-25883782-25884082+.fasta	FBgn0015542	3R	A	+	0.285089	ltu_avg	6.08562	13	3.80735	145	163	+	154	-97	9.83829	8.77e-05	0.574	GCCAATAGGCCGTTATTTC	N	A	SAME
FBgn0015570-3R-3367281-3367581+.fasta	FBgn0015570	3R	A	+	0.664594	fsv_avg	0.718019	0	0	222	240	-	231	-20	9.72319	9.27e-05	0.577	TCTAATTTTCTTTGAAATT	Y	A	DIFF
FBgn0015571-3R-3367302-3367602-.fasta	FBgn0015571	3R	A	-	0.248864	tes_avg	9.62702	165	7.37504	201	219	-	210	-160	9.72319	9.27e-05	0.577	TCTAATTTTCTTTGAAATT	N	A	SAME
FBgn0015574-3R-3354448-3354748-.fasta	FBgn0015574	3R	A	-	0.952255	tes_avg	8.01791	16	4.08746	101	119	-	110	-60	13.8668	9.42e-06	0.274	ATCAGTTGGCCATAATTTT	Y	A	SAME
FBgn0015576-3R-3341341-3341641-.fasta	FBgn0015576	3R	A	-	0.3277	aeye_avg	5.88008	4	2.32193	208	226	+	217	-167	11.5648	3.62e-05	0.448	GCTAGCTGGCCGCGCGTCT	N	A	DIFF
FBgn0015756-2L-11004102-11004402-.fasta	FBgn0015756	2L	A	-	0.0883697	asg_avg	10.1692	295	8.20945	173	191	+	182	-132	10.5289	6.23e-05	0.537	TACAGTAGTCTTTTTTTTT	N	A	DIFF
FBgn0015828-3L-11674887-11675187+.fasta	FBgn0015828	3L	A	+	0.216705	ova_avg	6.93805	30	4.9542	189	207	-	198	-53	11.6799	3.4e-05	0.446	CTAAATAAGCCTCGCCTTT	Y	A	DIFF
FBgn0015905-2L-1077697-1077997+.fasta	FBgn0015905	2L	A	+	0.288856	ova_avg	6.40745	12	3.70044	243	261	-	252	2	10.5289	6.23e-05	0.537	GTCAGTTTGCAGTGCGATA	N	A	DIFF
FBgn0016031-3L-5348395-5348695-.fasta	FBgn0016031	3L	A	-	0.176651	lsg_avg	6.10387	7	3	144	162	+	153	-103	9.60809	9.8e-05	0.582	CAAAACAGTCATTTATTTT	N	A	DIFF
FBgn0017556-2R-20389706-20390006-.fasta	FBgn0017556	2R	A	-	0.975855	tes_avg	8.73687	88	6.47573	81	99	-	90	-40	9.72319	9.27e-05	0.577	CCTAGCAGGCGTTTAGAAG	Y	A	SAME
FBgn0019830-2L-2770018-2770318-.fasta	FBgn0019830	2L	A	-	0.204136	fsv_avg	8.52989	51	5.70044	112	130	+	121	-71	15.8235	2.48e-06	0.179	CCAAGTTGGCAGCGCTATT	Y	A	DIFF
FBgn0019928-2R-9321461-9321761+.fasta	FBgn0019928	2R	A	+	0.909796	amg_avg	1.63862	10	3.45943	23	41	-	32	-219	11.5648	3.62e-05	0.448	ATTAGTTAGCCGTGAGATA	N	A	DIFF
FBgn0019972-3R-25625129-25625429+.fasta	FBgn0019972	3R	A	+	0.188106	ltu_avg	5.58391	5	2.58496	73	91	+	82	-169	11.9101	3e-05	0.431	GGAAGCAGGCCTGTTTTTT	N	A	SAME
FBgn0020261-X-19385933-19386233-.fasta	FBgn0020261	X	X	-	0.18781	ova_avg	7.73744	20	4.39232	39	57	+	48	3	15.0178	4.41e-06	0.219	GCAAGTAGGCGAGGCGTTG	N	X	DIFF
FBgn0020305-2L-869806-870106-.fasta	FBgn0020305	2L	A	-	0.27035	ova_avg	5.00952	22	4.52356	65	83	-	74	-24	10.2987	7e-05	0.547	ACCAGTTTTCCCTGATATG	Y	A	SAME
FBgn0020371-2L-15484517-15484817+.fasta	FBgn0020371	2L	A	+	0.949034	tes_avg	10.5237	100	6.65821	240	258	+	249	-2	10.5289	6.23e-05	0.537	AGCAGAAGGCTTGAAATTT	Y	A	SAME
FBgn0020386-3L-129199-129499+.fasta	FBgn0020386	3L	A	+	0.147858	aeye_avg	4.86283	63	6	32	50	-	41	-210	12.7158	1.9e-05	0.362	TTAAGTTAGCTTTAAATTT	N	A	DIFF
FBgn0020618-2L-7827195-7827495-.fasta	FBgn0020618	2L	A	-	0.0962876	asg_avg	9.27437	436	8.77149	21	39	-	30	21	11.5648	3.62e-05	0.448	GCCAGCTTGCAGCGCCTTT	N	A	SAME
FBgn0020653-X-8136310-8136610+.fasta	FBgn0020653	X	X	+	0.130197	ejd_avg	9.15983	111	6.80735	267	285	+	276	26	9.95339	8.3e-05	0.562	AAAAGTTGGCTCCGCTTAT	N	X	SAME
FBgn0021895-2R-19738568-19738868-.fasta	FBgn0021895	2R	A	-	0.180023	lcns_avg	7.10475	27	4.80735	59	77	-	68	-18	11.9101	3e-05	0.431	GATAGGTGGCCATGTTTTG	Y	A	SAME
FBgn0022029-2R-13307661-13307961+.fasta	FBgn0022029	2R	A	+	0.263121	asg_avg	5.30395	2	1.58496	227	245	-	236	-15	10.2987	7e-05	0.547	TTCTGAAGGCATTGCGTTG	Y	A	DIFF
FBgn0022153-2L-4393945-4394245+.fasta	FBgn0022153	2L	A	+	0.172306	lmg_avg	5.96414	5	2.58496	156	174	+	165	-86	9.95339	8.3e-05	0.562	ATAGGCAGGCATTTACTTT	N	A	SAME
FBgn0022936-3L-21814846-21815146+.fasta	FBgn0022936	3L	A	+	0.29214	ova_avg	6.90007	23	4.58496	280	298	+	289	39	10.4138	6.6e-05	0.543	AAAAGAGGTCCTGGACATT	N	A	SAME
FBgn0022987-2R-13356878-13357178+.fasta	FBgn0022987	2R	A	+	0.330396	lcns_avg	3.72864	1	1	170	188	-	179	-72	10.9893	4.92e-05	0.503	TACAGTAAGCACTGAATAA	Y	A	DIFF
FBgn0023215-X-3565583-3565883+.fasta	FBgn0023215	X	X	+	0.195445	abr_avg	4.69946	2	1.58496	108	126	+	117	-134	10.1836	7.41e-05	0.557	TCAAAATTGCATTGCCTTG	N	X	SAME
FBgn0023216-X-3565484-3565784-.fasta	FBgn0023216	X	X	-	0.363658	ova_avg	4.87028	7	3	207	225	+	216	-166	10.1836	7.41e-05	0.557	TCAAAATTGCATTGCCTTG	N	X	DIFF
FBgn0023520-X-1834022-1834322-.fasta	FBgn0023520	X	X	-	NA	NA	NA	3	2	80	98	+	89	-39	9.60809	9.8e-05	0.582	CGCAGATGTCGTGGAAATA	Y	X	DIFF
FBgn0023521-X-1834018-1834318+.fasta	FBgn0023521	X	X	+	0.177165	ova_avg	7.08509	54	5.78136	84	102	+	93	-158	9.60809	9.8e-05	0.582	CGCAGATGTCGTGGAAATA	N	X	SAME
FBgn0023528-X-2164743-2165043-.fasta	FBgn0023528	X	X	-	0.296755	ova_avg	4.68181	5	2.58496	194	212	-	203	-153	12.2554	2.47e-05	0.409	AGAAGTAGTCCTTACTTTG	N	X	SAME
FBgn0024294-2R-3034946-3035246+.fasta	FBgn0024294	2R	A	+	0.940921	ltr_avg	5.41197	5	2.58496	235	253	+	244	-7	12.2554	2.47e-05	0.409	GACAGGTGGCTGGGCCATT	Y	A	SAME
FBgn0024366-X-1235569-1235869-.fasta	FBgn0024366	X	X	-	0.771604	ltr_avg	0	1	1	268	286	-	277	-227	10.4138	6.6e-05	0.543	TATAGCTGCCATTTAATTT	N	X	SAME
FBgn0024432-3R-14124700-14125000+.fasta	FBgn0024432	3R	A	+	0.0630229	lmg_avg	10.1292	144	7.17991	253	271	-	262	12	14.9027	4.77e-06	0.219	CAAAGTTTGCTTTTAATTT	N	A	DIFF
FBgn0024732-2R-7931866-7932166+.fasta	FBgn0024732	2R	A	+	0.519321	ova_avg	0	1	1	226	244	+	235	-16	11.3346	4.1e-05	0.469	TATAAAAGGCAGTGCTTTT	Y	A	SAME
FBgn0024740-2L-10709402-10709702-.fasta	FBgn0024740	2L	A	-	0.804663	tes_avg	6.46073	1	1	152	170	-	161	-111	14.097	8.13e-06	0.265	TCCAGTTTGCCTGGCTTAA	N	A	SAME
FBgn0024806-3L-257903-258203-.fasta	FBgn0024806	3L	A	-	0.146128	lcns_avg	8.04723	5	2.58496	250	268	+	259	-209	10.5289	6.23e-05	0.537	GCTAGGTAGCCCTGAAATA	N	A	DIFF
FBgn0024807-X-21501134-21501434-.fasta	FBgn0024807	X	X	-	0.163477	atg_avg	7.81692	85	6.42626	219	237	-	228	-178	10.5289	6.23e-05	0.537	TTTAGCATGCTTTTAATTA	N	X	SAME
FBgn0024889-3L-19800081-19800381+.fasta	FBgn0024889	3L	A	+	0.110087	tes_avg	9.30437	46	5.55459	233	251	+	242	-9	9.95339	8.3e-05	0.562	AGCTGTGTGCATTGCATTT	Y	A	SAME
FBgn0024913-4-1105371-1105671-.fasta	FBgn0024913	4	A	-	0.73356	atg_avg	0.618695	0	0	23	41	-	32	19	13.1762	1.44e-05	0.333	CAAAGTATGCAATGTCATT	N	A	SAME
FBgn0024943-X-8423680-8423980-.fasta	FBgn0024943	X	X	-	0.946065	aeye_avg	0	0	0	278	296	+	287	-237	10.2987	7e-05	0.547	GAAAACAGTCTTTGCTTTG	N	X	DIFF
FBgn0024980-X-2638058-2638358-.fasta	FBgn0024980	X	X	-	0.374428	ahg_avg	5.74921	12	3.70044	67	85	-	76	-26	9.60809	9.8e-05	0.582	ACTGGGAGGCTCTGCGTTT	Y	X	SAME
FBgn0025109-2L-2987865-2988165+.fasta	FBgn0025109	2L	A	+	0.205692	lsg_avg	5.57195	26	4.75489	251	269	+	260	10	10.4138	6.6e-05	0.543	CACAGGTGTCTTGGAAATC	N	A	SAME
FBgn0025117-2L-9763094-9763394+.fasta	FBgn0025117	2L	A	+	0.0705134	ltr_avg	10.3347	167	7.39232	247	265	+	256	6	15.0178	4.41e-06	0.219	ATAAGGTGGCTTTGAGATT	N	A	SAME
FBgn0025463-X-13053490-13053790-.fasta	FBgn0025463	X	X	-	0.207651	lcns_avg	5.4645	9	3.32193	175	193	+	184	-134	16.0537	2.1e-06	0.164	TATAGTTGGCTTTGAAAAT	N	X	DIFF
FBgn0025574-3R-19715723-19716023-.fasta	FBgn0025574	3R	A	-	0.289971	ltu_avg	4.34349	2	1.58496	122	140	-	131	-81	9.95339	8.3e-05	0.562	GCTAGATAGCAGTGATATG	N	A	SAME
FBgn0025595-2L-6716135-6716435-.fasta	FBgn0025595	2L	A	-	0.658401	afb_avg	2.19487	0	0	190	208	-	199	-149	12.8309	1.77e-05	0.357	AAAAGTAGGCTACGATTTC	N	A	SAME
FBgn0025616-X-697452-697752-.fasta	FBgn0025616	X	X	-	0.990517	tes_avg	8.27186	79	6.32193	42	60	-	51	-1	13.0611	1.55e-05	0.344	ATAAGTTGGCCTGAAGTTT	Y	X	SAME
FBgn0025641-X-1198827-1199127-.fasta	FBgn0025641	X	X	-	0.53344	ltu_avg	5.60591	8	3.16993	200	218	+	209	-159	11.5648	3.62e-05	0.448	GCAAGGTGGCGGGGAATCT	N	X	DIFF
FBgn0025682-3L-1298421-1298721+.fasta	FBgn0025682	3L	A	+	0.330327	acg_avg	8.23061	264	8.04985	155	173	-	164	-87	12.2554	2.47e-05	0.409	CCCAGTTGGCGGGACTTTT	N	A	DIFF
FBgn0025700-2L-9918125-9918425-.fasta	FBgn0025700	2L	A	-	0.177853	lsg_avg	9.80985	111	6.80735	131	149	+	140	-90	9.72319	9.27e-05	0.577	CGATGTTTGCCATGGTTTT	N	A	DIFF
FBgn0025742-2L-6036886-6037186-.fasta	FBgn0025742	2L	A	-	0.244669	asg_avg	6.07069	14	3.90689	173	191	-	182	-132	10.9893	4.92e-05	0.503	TCTAGCTTTCCTTGATTAC	N	A	SAME
FBgn0025821-3R-7529501-7529801+.fasta	FBgn0025821	3R	A	+	0.962023	tes_avg	9.67687	82	6.37504	202	220	+	211	-40	11.795	3.2e-05	0.442	GTTAGTAGGCCTAGAAAAT	Y	A	SAME
FBgn0025830-2R-12737691-12737991+.fasta	FBgn0025830	2R	A	+	0.159336	ova_avg	4.91463	3	2	269	287	-	278	28	10.5289	6.23e-05	0.537	ACCAGCTGGCTGTGGCTAT	N	A	DIFF
FBgn0026060-X-5985453-5985753-.fasta	FBgn0026060	X	X	-	0.183148	ova_avg	6.03473	4	2.32193	32	50	+	41	10	11.6799	3.4e-05	0.446	GCAAGGTGGCAAGGCTATC	N	X	DIFF
FBgn0026063-3R-7178802-7179102-.fasta	FBgn0026063	3R	A	-	NA	NA	NA	12	3.70044	185	203	-	194	-144	11.3346	4.1e-05	0.469	ATCAGTTGGCCATTTTTTT	N	A	SAME
FBgn0026064-3R-7178802-7179102-.fasta	FBgn0026064	3R	A	-	NA	NA	NA	12	3.70044	185	203	-	194	-144	11.3346	4.1e-05	0.469	ATCAGTTGGCCATTTTTTT	N	A	SAME
FBgn0026141-2L-1344229-1344529+.fasta	FBgn0026141	2L	A	+	0.963376	tes_avg	11.2339	1868	10.8681	182	200	-	191	-60	10.4138	6.6e-05	0.543	AGATGCTTGCTATGATTTT	Y	A	DIFF
FBgn0026175-X-19709920-19710220+.fasta	FBgn0026175	X	X	+	NA	NA	NA	34	5.12928	232	250	-	241	-10	13.8668	9.42e-06	0.274	TTCGGTTTGCCTTGCCTTT	Y	X	DIFF
FBgn0026176-2R-8027683-8027983-.fasta	FBgn0026176	2R	A	-	0.860045	tes_avg	9.29353	92	6.53916	247	265	+	256	-206	10.9893	4.92e-05	0.503	TCAAGCGTGCTGGGCGTTG	N	A	DIFF
FBgn0026238-2R-1009701-1010001-.fasta	FBgn0026238	2R	A	-	0.190504	ova_avg	6.25183	2	1.58496	217	235	-	226	-176	11.5648	3.62e-05	0.448	GCTAGAAGTCCTCGAAATT	N	A	SAME
FBgn0026268-X-11063040-11063340-.fasta	FBgn0026268	X	X	-	0.940754	aeye_avg	0	0	0	11	29	+	20	31	12.7158	1.9e-05	0.362	GCCAGCGTTCCATGATTTT	N	X	DIFF
FBgn0026370-2R-11267978-11268278+.fasta	FBgn0026370	2R	A	+	0.15428	abr_avg	4.76311	45	5.52356	103	121	+	112	-139	11.9101	3e-05	0.431	TACAACTGGCCACGATTTT	N	A	SAME
FBgn0026385-2R-7208766-7209066-.fasta	FBgn0026385	2R	A	-	1	aeye_avg	0	0	0	12	30	+	21	30	11.3346	4.1e-05	0.469	CGCAGAAGGCTGAGATTTG	N	A	DIFF
FBgn0026438-2L-744344-744644-.fasta	FBgn0026438	2L	A	-	0.845607	aeye_avg	0	0	0	47	65	+	56	-6	10.7591	5.54e-05	0.524	GAAAGTGAGCAATGTATTT	Y	A	DIFF
FBgn0026562-3R-22697666-22697966-.fasta	FBgn0026562	3R	A	-	0.277601	lfb_avg	6.94056	36	5.20945	169	187	-	178	-128	10.8742	5.22e-05	0.511	CGAAGCAATCAGTGTTTTT	N	A	SAME
FBgn0026592-3L-3892323-3892623+.fasta	FBgn0026592	3L	A	+	0.653516	aeye_avg	6.12928	15	4	13	31	+	22	-229	13.9819	8.76e-06	0.272	ACAAGCTAGCTTGGCTATT	N	A	SAME
FBgn0027081-2L-12103500-12103800+.fasta	FBgn0027081	2L	A	+	0.176524	lsg_avg	7.21166	40	5.35755	186	204	+	195	-56	12.8309	1.77e-05	0.357	TGATGCTAGCATTGCATTT	Y	A	SAME
FBgn0027086-3L-22281514-22281814+.fasta	FBgn0027086	3L	A	+	0.165591	lsg_avg	6.76093	7	3	137	155	+	146	-105	9.72319	9.27e-05	0.577	GTAAATAAGCCTTTCTTTT	N	A	SAME
FBgn0027103-3R-19960302-19960602+.fasta	FBgn0027103	3R	A	+	0.0826954	lcns_avg	6.51713	4	2.32193	277	295	-	286	36	9.60809	9.8e-05	0.582	TTTAATAGGCGTTTCTTTT	N	A	DIFF
FBgn0027107-X-20140475-20140775-.fasta	FBgn0027107	X	X	-	1	tes_avg	4.68247	6	2.80735	111	129	-	120	-70	11.4497	3.86e-05	0.458	CCAAGCAAGCCGTAACTCT	Y	X	SAME
FBgn0027259-X-11466424-11466724-.fasta	FBgn0027259	X	X	-	0.302494	lcns_avg	4.38678	1	1	261	279	+	270	-220	21.3483	1.19e-08	0.0125	CTAAGCAGGCCTTGCGTTT	N	X	DIFF
FBgn0027287-X-15380704-15381004+.fasta	FBgn0027287	X	X	+	0.324863	acg_avg	5.98165	19	4.32193	12	30	+	21	-230	9.72319	9.27e-05	0.577	CTAAGTATGCTAAGAGTAT	N	X	SAME
FBgn0027291-X-19415786-19416086-.fasta	FBgn0027291	X	X	-	0.0978622	lhg_avg	7.06779	20	4.39232	226	244	+	235	-185	15.248	3.75e-06	0.206	TAAAGTTGGCTGTGAATAA	N	X	DIFF
FBgn0027342-X-7004274-7004574-.fasta	FBgn0027342	X	X	-	0.264492	ova_avg	5.00209	4	2.32193	35	53	-	44	7	17.4349	7.01e-07	0.0939	ACCAGTATGCGTTGAATTT	N	X	SAME
FBgn0027494-3R-23478231-23478531+.fasta	FBgn0027494	3R	A	+	0.952612	tes_avg	7.55702	160	7.33092	38	56	+	47	-204	10.0685	7.84e-05	0.562	TGAAGAAAGCTTCGCATAT	N	A	SAME
FBgn0027495-2R-8027885-8028185+.fasta	FBgn0027495	2R	A	+	0.322549	tes_avg	8.00504	50	5.67243	45	63	+	54	-197	10.9893	4.92e-05	0.503	TCAAGCGTGCTGGGCGTTG	N	A	SAME
FBgn0027553-X-7622304-7622604-.fasta	FBgn0027553	X	X	-	0.246161	lsg_avg	4.52634	1	1	152	170	-	161	-111	10.4138	6.6e-05	0.543	CAAAGTTGGCTATTACAAG	N	X	SAME
FBgn0027599-2R-20835847-20836147-.fasta	FBgn0027599	2R	A	-	0.133992	ova_avg	7.69803	37	5.24793	18	36	-	27	24	9.72319	9.27e-05	0.577	AGAAACATGCGTTGCTATT	N	A	SAME
FBgn0027795-X-1351036-1351336-.fasta	FBgn0027795	X	X	-	0.945162	tes_avg	8.53738	91	6.52356	109	127	-	118	-68	21.1181	1.6e-08	0.0147	TCTAGTAGGCCTGGCTTTT	Y	X	SAME
FBgn0028398-2L-2767639-2767939+.fasta	FBgn0028398	2L	A	+	0.198896	asg_avg	5.2488	17	4.16993	73	91	-	82	-169	11.9101	3e-05	0.431	GCAAGCAGTCATGGACAAT	N	A	DIFF
FBgn0028410-2L-13158559-13158859+.fasta	FBgn0028410	2L	A	+	0.990524	tes_avg	6.77882	16	4.08746	198	216	+	207	-44	12.8309	1.77e-05	0.357	ACAAGGTGGCAATGCCTAA	Y	A	SAME
FBgn0028412-2L-11586782-11587082-.fasta	FBgn0028412	2L	A	-	0.959385	tes_avg	10.9844	242	7.92481	80	98	-	89	-39	13.8668	9.42e-06	0.274	CACAGTTGCCCCTGCGTTT	Y	A	SAME
FBgn0028515-2L-16257437-16257737+.fasta	FBgn0028515	2L	A	+	0.201797	lsg_avg	6.85296	26	4.75489	116	134	+	125	-126	13.6366	1.09e-05	0.296	CGAAGTAGGCGTTGCGAAC	N	A	SAME
FBgn0028520-2L-16094758-16095058+.fasta	FBgn0028520	2L	A	+	0.929559	tes_avg	8.62648	156	7.29462	178	196	+	187	-64	10.4138	6.6e-05	0.543	CGAAGTTATCTTTAAGTTT	Y	A	SAME
FBgn0028563-2R-3970230-3970530+.fasta	FBgn0028563	2R	A	+	0.280706	ova_avg	3.01308	0	0	62	80	-	71	-180	11.9101	3e-05	0.431	TCCAGATTGCATAGAATTT	N	A	DIFF
FBgn0028570-2L-2290647-2290947-.fasta	FBgn0028570	2L	A	-	0.964993	tes_avg	8.82803	209	7.71425	72	90	-	81	-31	11.9101	3e-05	0.431	TCAAGTATGCCCGGAGCTT	Y	A	SAME
FBgn0028581-X-17036972-17037272-.fasta	FBgn0028581	X	X	-	NA	NA	NA	42	5.42626	127	145	-	136	-86	9.60809	9.8e-05	0.582	TGTAGGAGGCTAGTCATTA	N	X	SAME
FBgn0028667-3L-11466140-11466440+.fasta	FBgn0028667	3L	A	+	0.963684	tes_avg	7.71895	25	4.70044	210	228	+	219	-32	10.2987	7e-05	0.547	ATAAGTTGGCGGCGAATAT	Y	A	SAME
FBgn0028669-2R-14799349-14799649-.fasta	FBgn0028669	2R	A	-	0.950015	tes_avg	8.94507	96	6.59991	6	24	-	15	36	12.3705	2.32e-05	0.396	CCAAGTGGGCCGAGAAAAT	N	A	SAME
FBgn0028688-3R-18287725-18288025-.fasta	FBgn0028688	3R	A	-	0.156038	ltu_avg	8.98631	217	7.76818	99	117	+	108	-58	9.60809	9.8e-05	0.582	TCAAGATAGCGACGAAATT	Y	A	DIFF
FBgn0028697-3LHet-2397540-2397840+.fasta	FBgn0028697	3LHet	A	+	NA	NA	NA	86	6.44294	243	261	-	252	2	12.4856	2.17e-05	0.38	AGAAGGAAGCAATGAGTTG	N	A	DIFF
FBgn0028847-2L-13723591-13723891-.fasta	FBgn0028847	2L	A	-	0.970394	tes_avg	10.1959	214	7.74819	51	69	-	60	-10	11.4497	3.86e-05	0.458	CATAGTTGGCTTTTAATCA	Y	A	SAME
FBgn0028858-2L-15979284-15979584+.fasta	FBgn0028858	2L	A	+	0.977639	tes_avg	9.09795	107	6.75489	77	95	+	86	-165	9.95339	8.3e-05	0.562	TCAAGATTGCATGGTATTG	N	A	SAME
FBgn0028887-2L-14924484-14924784+.fasta	FBgn0028887	2L	A	+	0.989834	tes_avg	6.65864	10	3.45943	42	60	+	51	-200	10.4138	6.6e-05	0.543	TCGAGCTGGCATTGAGCTG	N	A	SAME
FBgn0028897-2L-16261890-16262190+.fasta	FBgn0028897	2L	A	+	0.532282	tes_avg	7.64932	24	4.64386	20	38	-	29	-222	12.1403	2.64e-05	0.414	TTAAGATGGCTGCGCTTTT	N	A	DIFF
FBgn0028901-2L-15783834-15784134+.fasta	FBgn0028901	2L	A	+	0.876446	tes_avg	9.13964	15	4	6	24	+	15	-236	14.2121	7.55e-06	0.255	AAAAGTTGGCAGGGAGTTG	N	A	SAME
FBgn0028913-2L-14563675-14563975-.fasta	FBgn0028913	2L	A	-	0.842705	tes_avg	9.39947	64	6.02237	174	192	+	183	-133	16.7443	1.23e-06	0.119	TTCAGTGGGCATTGAAATT	N	A	DIFF
FBgn0028997-3R-5505410-5505710+.fasta	FBgn0028997	3R	A	+	0.870096	tes_avg	9.92828	128	7.01123	87	105	+	96	-155	10.4138	6.6e-05	0.543	CAAAGAAGGCTTTATCTTT	N	A	SAME
FBgn0029118-3L-5556740-5557040-.fasta	FBgn0029118	3L	A	-	0.354337	lfb_avg	6.96527	57	5.85798	87	105	-	96	-46	11.5648	3.62e-05	0.448	TCAAGATGGCAGTGGCATT	Y	A	SAME
FBgn0029121-3L-5556623-5556923+.fasta	FBgn0029121	3L	A	+	0.140381	ltu_avg	6.85936	6	2.80735	47	65	-	56	-195	9.60809	9.8e-05	0.582	CCAAGTTAGCCAAGGTATT	N	A	DIFF
FBgn0029121-3L-5556623-5556923+.fasta	FBgn0029121	3L	A	+	0.140381	ltu_avg	6.85936	6	2.80735	204	222	-	213	-38	11.5648	3.62e-05	0.448	TCAAGATGGCAGTGGCATT	Y	A	DIFF
FBgn0029128-X-38783-39083+.fasta	FBgn0029128	X	X	+	0.688397	lhg_avg	2.22969	0	0	256	274	-	265	15	13.2913	1.35e-05	0.321	TTAAATTGGCTTGGAGTTT	N	X	DIFF
FBgn0029134-2R-6707232-6707532+.fasta	FBgn0029134	2R	A	+	0.121138	aht_avg	8.10661	69	6.12928	269	287	+	278	28	16.8594	1.12e-06	0.118	ACAAGTAGGCAACGAATTT	N	A	SAME
FBgn0029501-2R-20381790-20382090+.fasta	FBgn0029501	2R	A	+	0.97743	tes_avg	9.62649	162	7.34873	203	221	+	212	-39	11.5648	3.62e-05	0.448	CACAGTAGTCCAGGTGTTG	Y	A	SAME
FBgn0029539-X-788264-788564+.fasta	FBgn0029539	X	X	+	0.972331	tes_avg	9.80936	429	8.74819	191	209	+	200	-51	14.5574	6.02e-06	0.237	TCAAGTATGCCTGGAGTCG	Y	X	SAME
FBgn0029552-X-905817-906117+.fasta	FBgn0029552	X	X	+	0.912992	tes_avg	7.70271	60	5.93074	227	245	+	236	-15	10.2987	7e-05	0.547	TAAAGAAGGCATTTCTCTT	Y	X	SAME
FBgn0029646-X-2839185-2839485+.fasta	FBgn0029646	X	X	+	0.828185	lmg_avg	0	0	0	101	119	+	110	-141	12.2554	2.47e-05	0.409	TATAGCTGGCAGCGATTTG	N	X	SAME
FBgn0029659-X-3354222-3354522-.fasta	FBgn0029659	X	X	-	0.911856	tes_avg	10.3616	442	8.79116	121	139	-	130	-80	19.0463	1.62e-07	0.0596	GGCAGCAGGCATTGCCTTT	Y	X	SAME
FBgn0029660-X-3354374-3354674+.fasta	FBgn0029660	X	X	+	0.967874	tes_avg	7.2436	11	3.58496	170	188	+	179	-72	17.4349	7.01e-07	0.0939	CAAAGTTGGCCTTGAAAAA	Y	X	SAME
FBgn0029669-X-3408098-3408398+.fasta	FBgn0029669	X	X	+	0.90007	tes_avg	5.90239	80	6.33985	241	259	+	250	-1	12.6007	2.03e-05	0.374	TAAAGTAAGCTGTGACTCG	Y	X	SAME
FBgn0029702-X-4162483-4162783+.fasta	FBgn0029702	X	X	+	0.97223	tes_avg	9.518	111	6.80735	191	209	+	200	-51	16.399	1.61e-06	0.145	CACAGTAGGCAGCGATTTT	Y	X	SAME
FBgn0029703-X-4196328-4196628-.fasta	FBgn0029703	X	X	-	1	tes_avg	7.15567	45	5.52356	127	145	-	136	-86	15.3631	3.46e-06	0.199	CCAGGCATGCCATGCTTTT	N	X	SAME
FBgn0029717-X-4465911-4466211-.fasta	FBgn0029717	X	X	-	0.976231	tes_avg	8.8997	28	4.85798	142	160	-	151	-101	18.1255	3.85e-07	0.0787	CCTAGCAGGCTGTGAATTA	N	X	SAME
FBgn0029726-X-4676758-4677058-.fasta	FBgn0029726	X	X	-	0.969559	tes_avg	8.53145	8	3.16993	63	81	-	72	-22	12.2554	2.47e-05	0.409	GCTGGTAGGCATTGCCATA	Y	X	SAME
FBgn0029730-X-4769452-4769752+.fasta	FBgn0029730	X	X	+	0.905085	tes_avg	9.39341	52	5.72792	40	58	-	49	-202	9.83829	8.77e-05	0.574	CCAAGTTTTCCCTTACATT	N	X	DIFF
FBgn0029730-X-4769452-4769752+.fasta	FBgn0029730	X	X	+	0.905085	tes_avg	9.39341	52	5.72792	183	201	+	192	-59	13.4064	1.25e-05	0.313	CCAAGTGGGCCGTGTAATC	Y	X	SAME
FBgn0029737-X-4812512-4812812+.fasta	FBgn0029737	X	X	+	0.124331	acg_avg	7.76904	35	5.16993	237	255	+	246	-5	14.3272	7e-06	0.255	CGAAGTAGGCAATGTTATA	Y	X	SAME
FBgn0029745-X-5025680-5025980+.fasta	FBgn0029745	X	X	+	0.886914	tes_avg	8.27435	31	5	230	248	+	239	-12	16.6292	1.35e-06	0.127	TGTAGCTGGCTGTGAAATT	Y	X	SAME
FBgn0029747-X-5076351-5076651-.fasta	FBgn0029747	X	X	-	0.974033	tes_avg	8.55567	43	5.45943	92	110	-	101	-51	16.8594	1.12e-06	0.118	CCCAGCAAGCTTTGAATTC	Y	X	SAME
FBgn0029750-X-5199673-5199973-.fasta	FBgn0029750	X	X	-	0.936482	tes_avg	9.78255	154	7.27612	124	142	-	133	-83	10.5289	6.23e-05	0.537	CGCAGCAGTCCTTGAACAC	N	X	SAME
FBgn0029750-X-5199673-5199973-.fasta	FBgn0029750	X	X	-	0.936482	tes_avg	9.78255	154	7.27612	261	279	+	270	-220	14.5574	6.02e-06	0.237	CCCAGCATTCCGTGCCTTG	N	X	DIFF
FBgn0029751-X-5201399-5201699-.fasta	FBgn0029751	X	X	-	0.974667	tes_avg	8.37066	52	5.72792	238	256	-	247	-197	10.4138	6.6e-05	0.543	TTAAGGATGCATTGCATCC	N	X	SAME
FBgn0029812-X-5702785-5703085+.fasta	FBgn0029812	X	X	+	0.989385	tes_avg	7.83116	73	6.20945	189	207	+	198	-53	13.5215	1.17e-05	0.305	ATAAGTTATCTTTGATTTT	Y	X	SAME
FBgn0029838-X-5971512-5971812-.fasta	FBgn0029838	X	X	-	0.547734	aht_avg	4.45103	10	3.45943	108	126	-	117	-67	10.8742	5.22e-05	0.511	CACAGCTGGCGTTGTCTAA	Y	X	SAME
FBgn0029859-X-6188325-6188625-.fasta	FBgn0029859	X	X	-	NA	NA	NA	333	8.3837	95	113	-	104	-54	11.9101	3e-05	0.431	TCAAGTAGTCCTTTGGTTT	Y	X	SAME
FBgn0029940-X-7160686-7160986+.fasta	FBgn0029940	X	X	+	0.852699	tes_avg	10.6547	154	7.27612	203	221	+	212	-39	18.5859	2.52e-07	0.0743	AACAGTAGTCCTTGATTTT	Y	X	SAME
FBgn0029947-X-7252578-7252878+.fasta	FBgn0029947	X	X	+	0.952848	tes_avg	10.6099	239	7.90689	210	228	+	219	-32	15.9386	2.28e-06	0.171	ATTAGCTAGCCTTGACTTT	Y	X	SAME
FBgn0029949-X-7297156-7297456-.fasta	FBgn0029949	X	X	-	0.956014	tes_avg	9.64158	39	5.32193	111	129	-	120	-70	12.946	1.66e-05	0.35	GATAGATGGCGTTGATTTA	Y	X	SAME
FBgn0029951-X-7468072-7468372+.fasta	FBgn0029951	X	X	+	0.977437	tes_avg	9.16306	55	5.80735	230	248	+	239	-12	14.3272	7e-06	0.255	CTCAACAGGCATTGAAATT	Y	X	SAME
FBgn0029952-X-7480113-7480413-.fasta	FBgn0029952	X	X	-	0.965064	tes_avg	10.2533	222	7.8009	114	132	-	123	-73	19.2765	1.29e-07	0.0592	CCAAGTAGTCCTTGCATTC	Y	X	SAME
FBgn0029970-X-7785628-7785928-.fasta	FBgn0029970	X	X	-	0.953148	ova_avg	0	0	0	32	50	-	41	10	10.2987	7e-05	0.547	TGCAGGTAGCAATGAGAAT	N	X	SAME
FBgn0030001-X-8029695-8029995-.fasta	FBgn0030001	X	X	-	0.88437	aeye_avg	3.39306	1	1	28	46	-	37	14	9.72319	9.27e-05	0.577	AGTTGCTTGCCATGAAATT	N	X	SAME
FBgn0030005-X-8029606-8029906+.fasta	FBgn0030005	X	X	+	0.729058	acr_avg	0	1	1	117	135	-	126	-125	9.72319	9.27e-05	0.577	AGTTGCTTGCCATGAAATT	N	X	DIFF
FBgn0030050-X-8464930-8465230-.fasta	FBgn0030050	X	X	-	NA	NA	NA	364	8.51175	258	276	+	267	-217	9.83829	8.77e-05	0.574	TGCAGTTGGCTTTTGCTTA	N	X	DIFF
FBgn0030067-X-8795473-8795773+.fasta	FBgn0030067	X	X	+	0.264898	ova_avg	4.38538	59	5.90689	180	198	-	189	-62	14.2121	7.55e-06	0.255	GCCAGATGGCAATGAATTC	Y	X	DIFF
FBgn0030071-X-8817669-8817969-.fasta	FBgn0030071	X	X	-	0.989554	tes_avg	6.96681	7	3	63	81	-	72	-22	12.4856	2.17e-05	0.38	CCAAAGTAGCATTGCGTTT	Y	X	SAME
FBgn0030120-X-9163907-9164207-.fasta	FBgn0030120	X	X	-	0.973192	tes_avg	6.8358	46	5.55459	115	133	-	124	-74	14.6725	5.57e-06	0.229	TCAAGTAGTCGTGGCGATT	Y	X	SAME
FBgn0030191-X-10225800-10226100-.fasta	FBgn0030191	X	X	-	0.95131	tes_avg	10.8091	281	8.13955	108	126	-	117	-67	15.4782	3.19e-06	0.189	TCATGTAGGCCATGAAATG	Y	X	SAME
FBgn0030208-X-10372620-10372920+.fasta	FBgn0030208	X	X	+	0.242782	lsg_avg	4.11627	10	3.45943	176	194	-	185	-66	11.795	3.2e-05	0.442	GCTAGCAATCGATGATTTT	Y	X	DIFF
FBgn0030215-X-10460573-10460873-.fasta	FBgn0030215	X	X	-	0.853499	tes_avg	9.64033	137	7.10852	74	92	-	83	-33	10.9893	4.92e-05	0.503	CGTAGTAGGCCCATAATTT	Y	X	SAME
FBgn0030215-X-10460573-10460873-.fasta	FBgn0030215	X	X	-	0.853499	tes_avg	9.64033	137	7.10852	115	133	-	124	-74	14.7876	5.16e-06	0.226	TAAAGTTGGCCTTTTCTTT	Y	X	SAME
FBgn0030224-X-10567448-10567748-.fasta	FBgn0030224	X	X	-	0.922079	tes_avg	8.87269	24	4.64386	77	95	-	86	-36	14.2121	7.55e-06	0.255	CTTAGGAAGCAATGACTTT	Y	X	SAME
FBgn0030258-X-10947498-10947798-.fasta	FBgn0030258	X	X	-	0.898403	atg_avg	0	0	0	239	257	-	248	-198	12.8309	1.77e-05	0.357	CAAAATTTGCATTGCAATT	N	X	SAME
FBgn0030260-X-10957152-10957452-.fasta	FBgn0030260	X	X	-	0.752743	atg_avg	0	0	0	142	160	+	151	-101	10.5289	6.23e-05	0.537	CCCAGATGCCATTTATTTT	N	X	DIFF
FBgn0030277-X-11064630-11064930-.fasta	FBgn0030277	X	X	-	0.939106	tes_avg	11.4328	1562	10.6101	178	196	+	187	-137	17.4349	7.01e-07	0.0939	TGCAGTTGGCCATGAAAAT	N	X	DIFF
FBgn0030278-X-11076713-11077013+.fasta	FBgn0030278	X	X	+	0.921241	tes_avg	10.67	116	6.87036	63	81	+	72	-179	12.4856	2.17e-05	0.38	AAAAGTGGGCAATTCATTT	N	X	SAME
FBgn0030278-X-11076713-11077013+.fasta	FBgn0030278	X	X	+	0.921241	tes_avg	10.67	116	6.87036	182	200	+	191	-60	11.6799	3.4e-05	0.446	TCAAGCTATCCATGAGAAT	Y	X	SAME
FBgn0030280-X-11096030-11096330+.fasta	FBgn0030280	X	X	+	0.926381	tes_avg	10.9862	1264	10.3049	10	28	-	19	-232	9.72319	9.27e-05	0.577	TGATGTATGCATTTCCTTT	N	X	DIFF
FBgn0030280-X-11096030-11096330+.fasta	FBgn0030280	X	X	+	0.926381	tes_avg	10.9862	1264	10.3049	136	154	-	145	-106	11.3346	4.1e-05	0.469	CTTAGAATGCCTGGATATA	N	X	DIFF
FBgn0030280-X-11096030-11096330+.fasta	FBgn0030280	X	X	+	0.926381	tes_avg	10.9862	1264	10.3049	187	205	+	196	-55	10.1836	7.41e-05	0.557	ACAAGTAGCCCTTGTGATC	Y	X	SAME
FBgn0030283-X-11142018-11142318+.fasta	FBgn0030283	X	X	+	0.95239	tes_avg	10.6956	1326	10.374	221	239	+	230	-21	14.6725	5.57e-06	0.229	GTAAGTAGGCCTCGCAATG	Y	X	SAME
FBgn0030305-X-11377300-11377600+.fasta	FBgn0030305	X	X	+	0.262379	lsg_avg	6.03853	22	4.52356	147	165	+	156	-95	11.1044	4.63e-05	0.49	ACCAGCTGGCAATGTAAAT	N	X	SAME
FBgn0030309-X-11452628-11452928-.fasta	FBgn0030309	X	X	-	0.254503	ltr_avg	7.21422	66	6.06609	234	252	+	243	-193	12.6007	2.03e-05	0.374	CAAAACATGCATTGCAATT	N	X	DIFF
FBgn0030313-X-11466489-11466789+.fasta	FBgn0030313	X	X	+	0.983095	tes_avg	8.96825	22	4.52356	196	214	+	205	-46	21.3483	1.19e-08	0.0125	CTAAGCAGGCCTTGCGTTT	Y	X	SAME
FBgn0030334-X-11682626-11682926+.fasta	FBgn0030334	X	X	+	0.779539	aht_avg	1.35552	1	1	66	84	-	75	-176	13.5215	1.17e-05	0.305	TAAAGTATTCCTTGATCTT	N	X	DIFF
FBgn0030374-X-11981007-11981307-.fasta	FBgn0030374	X	X	-	0.970254	tes_avg	8.89817	11	3.58496	15	33	+	24	27	12.7158	1.9e-05	0.362	TCCGGAATGCCTTGAAATT	N	X	DIFF
FBgn0030374-X-11981007-11981307-.fasta	FBgn0030374	X	X	-	0.970254	tes_avg	8.89817	11	3.58496	108	126	-	117	-67	15.5933	2.94e-06	0.189	CGCAGTTGGCAATGCTTAG	Y	X	SAME
FBgn0030377-X-12072608-12072908-.fasta	FBgn0030377	X	X	-	0.92244	tes_avg	5.58485	18	4.24793	16	34	+	25	26	10.2987	7e-05	0.547	TCCAATTTTCCATGCCATT	N	X	DIFF
FBgn0030384-X-12266900-12267200+.fasta	FBgn0030384	X	X	+	0.978329	tes_avg	8.25797	42	5.42626	180	198	+	189	-62	9.60809	9.8e-05	0.582	TATAGATAGCCTTGGTTTG	Y	X	SAME
FBgn0030395-X-12390579-12390879-.fasta	FBgn0030395	X	X	-	0.803651	tes_avg	3.97949	1	1	81	99	-	90	-40	13.7517	1.01e-05	0.288	CAAAGAAGGCCAGTCATTT	Y	X	SAME
FBgn0030412-X-12525387-12525687+.fasta	FBgn0030412	X	X	+	0.28326	abr_avg	5.00917	2	1.58496	228	246	+	237	-14	10.4138	6.6e-05	0.543	CCAAGCTTGCCGTTCATCG	Y	X	SAME
FBgn0030417-X-12599636-12599936+.fasta	FBgn0030417	X	X	+	0.917911	lcns_avg	0	0	0	208	226	-	217	-34	9.60809	9.8e-05	0.582	CGAAAAATGCATTGCATAT	Y	X	DIFF
FBgn0030431-X-12797499-12797799-.fasta	FBgn0030431	X	X	-	0.192032	ova_avg	5.71168	10	3.45943	48	66	+	57	-7	10.2987	7e-05	0.547	GCCAGGAAGCTTTGCGTAC	Y	X	DIFF
FBgn0030457-X-13053386-13053686+.fasta	FBgn0030457	X	X	+	0.12029	tes_avg	7.80712	11	3.58496	279	297	+	288	38	16.0537	2.1e-06	0.164	TATAGTTGGCTTTGAAAAT	N	X	SAME
FBgn0030462-X-13152477-13152777-.fasta	FBgn0030462	X	X	-	0.97434	tes_avg	9.18733	27	4.80735	104	122	-	113	-63	16.9745	1.02e-06	0.118	TCCAGTAGTCATTGAGTTA	Y	X	SAME
FBgn0030462-X-13152477-13152777-.fasta	FBgn0030462	X	X	-	0.97434	tes_avg	9.18733	27	4.80735	151	169	-	160	-110	11.1044	4.63e-05	0.49	TCTAGTGTGCGAGGAAATT	N	X	SAME
FBgn0030483-X-13296845-13297145-.fasta	FBgn0030483	X	X	-	0.950453	tes_avg	6.87355	8	3.16993	66	84	-	75	-25	13.1762	1.44e-05	0.333	TCAAGGATGCCATTAAATT	Y	X	SAME
FBgn0030511-X-13576734-13577034+.fasta	FBgn0030511	X	X	+	0.189203	fsv_avg	3.54032	1	1	123	141	-	132	-119	9.60809	9.8e-05	0.582	AGCAGGGGGCTTTCCATTT	N	X	DIFF
FBgn0030536-X-13849033-13849333+.fasta	FBgn0030536	X	X	+	0.860651	tes_avg	9.78169	133	7.06609	178	196	+	187	-64	16.7443	1.23e-06	0.119	CATAGCAGGCTCTGACTTT	Y	X	SAME
FBgn0030552-X-14120071-14120371+.fasta	FBgn0030552	X	X	+	0.140952	ova_avg	5.84728	9	3.32193	277	295	-	286	36	14.2121	7.55e-06	0.255	TGTAATTTGCCTTGCTTTT	N	X	DIFF
FBgn0030554-X-14131887-14132187+.fasta	FBgn0030554	X	X	+	0.37697	aeye_avg	1.7358	3	2	30	48	-	39	-212	9.83829	8.77e-05	0.574	CCAAGCAAGCCAAAAGTTT	N	X	DIFF
FBgn0030555-X-14131905-14132205-.fasta	FBgn0030555	X	X	-	0.433985	aeye_avg	3.8409	2	1.58496	12	30	-	21	30	9.83829	8.77e-05	0.574	CCAAGCAAGCCAAAAGTTT	N	X	SAME
FBgn0030577-X-14669090-14669390+.fasta	FBgn0030577	X	X	+	0.989671	tes_avg	5.37683	4	2.32193	53	71	+	62	-189	11.5648	3.62e-05	0.448	CACAAAATGCTTTGATTTT	N	X	SAME
FBgn0030587-X-14742790-14743090-.fasta	FBgn0030587	X	X	-	0.867988	aeye_avg	0	0	0	57	75	+	66	-16	10.4138	6.6e-05	0.543	CCGAGCTTTCCGTGATATT	Y	X	DIFF
FBgn0030595-X-14804827-14805127-.fasta	FBgn0030595	X	X	-	0.943822	aht_avg	0	0	0	121	139	-	130	-80	13.8668	9.42e-06	0.274	CTCAGTGGGCCATGGCTTT	Y	X	SAME
FBgn0030599-X-14849082-14849382-.fasta	FBgn0030599	X	X	-	0.825704	tes_avg	9.15957	20	4.39232	93	111	-	102	-52	10.1836	7.41e-05	0.557	AGTAGTTGGCCACGTTTTA	Y	X	SAME
FBgn0030614-X-14990024-14990324-.fasta	FBgn0030614	X	X	-	0.96648	tes_avg	9.53045	59	5.90689	77	95	-	86	-36	12.7158	1.9e-05	0.362	ATCAGAAGCCCTTGAGTTT	Y	X	SAME
FBgn0030617-X-15057207-15057507-.fasta	FBgn0030617	X	X	-	0.682244	ltr_avg	0.656058	1	1	238	256	-	247	-197	11.795	3.2e-05	0.442	ATCAGCGGGCCCTGAATTC	N	X	SAME
FBgn0030624-X-15166387-15166687-.fasta	FBgn0030624	X	X	-	0.918851	tes_avg	10.0612	79	6.32193	82	100	+	91	-41	10.9893	4.92e-05	0.503	TGAAATGAGCCATGACATT	Y	X	DIFF
FBgn0030624-X-15166387-15166687-.fasta	FBgn0030624	X	X	-	0.918851	tes_avg	10.0612	79	6.32193	112	130	-	121	-71	14.2121	7.55e-06	0.255	ACCAGCTGGCTTTGAAAAG	Y	X	SAME
FBgn0030659-X-15476856-15477156-.fasta	FBgn0030659	X	X	-	0.262373	ova_avg	5.45912	13	3.80735	211	229	-	220	-170	15.4782	3.19e-06	0.189	AATAGTTTGCCTTGCTTTA	N	X	SAME
FBgn0030660-X-15476941-15477241+.fasta	FBgn0030660	X	X	+	0.509089	tes_avg	8.37788	31	5	126	144	-	135	-116	15.4782	3.19e-06	0.189	AATAGTTTGCCTTGCTTTA	N	X	DIFF
FBgn0030664-X-15556367-15556667+.fasta	FBgn0030664	X	X	+	0.978718	tes_avg	3.33638	1	1	79	97	+	88	-163	10.4138	6.6e-05	0.543	TAAAGGTAGCTTTGCAAAA	N	X	SAME
FBgn0030667-X-15582839-15583139-.fasta	FBgn0030667	X	X	-	0.985393	tes_avg	5.22284	12	3.70044	98	116	+	107	-57	12.4856	2.17e-05	0.38	CACAGGTGGCAACGCATTG	Y	X	DIFF
FBgn0030693-X-15690010-15690310-.fasta	FBgn0030693	X	X	-	0.111566	aeye_avg	9.388	53	5.75489	172	190	-	181	-131	9.83829	8.77e-05	0.574	CAAAGGATTCATTGAGATC	N	X	SAME
FBgn0030697-X-15731612-15731912+.fasta	FBgn0030697	X	X	+	0.941531	tes_avg	10.6349	122	6.94251	175	193	+	184	-67	16.399	1.61e-06	0.145	TCAAGTGGGCATTGAAAAT	Y	X	SAME
FBgn0030717-X-15877554-15877854+.fasta	FBgn0030717	X	X	+	0.0857897	ova_avg	6.35994	8	3.16993	219	237	-	228	-23	11.2195	4.36e-05	0.483	TAAAGCTTTCGGTGCGTTT	Y	X	DIFF
FBgn0030722-X-15956837-15957137-.fasta	FBgn0030722	X	X	-	0.954347	tes_avg	8.19858	70	6.14975	122	140	-	131	-81	12.7158	1.9e-05	0.362	CAAAGGATGCTTTGGATTT	N	X	SAME
FBgn0030737-X-16202375-16202675-.fasta	FBgn0030737	X	X	-	NA	NA	NA	66	6.06609	190	208	+	199	-149	12.8309	1.77e-05	0.357	GATAGTGGGCCGTGCGATA	N	X	DIFF
FBgn0030773-X-16594152-16594452-.fasta	FBgn0030773	X	X	-	NA	NA	NA	1	1	44	62	-	53	-3	12.7158	1.9e-05	0.362	TGCAGTGAGCACTGCTTTT	Y	X	SAME
FBgn0030791-X-16693716-16694016-.fasta	FBgn0030791	X	X	-	0.132434	lsg_avg	6.41043	10	3.45943	45	63	+	54	-4	11.2195	4.36e-05	0.483	CTAAGAATGCTTTTAGTTT	Y	X	DIFF
FBgn0030800-X-16778347-16778647-.fasta	FBgn0030800	X	X	-	0.190434	ova_avg	2.54012	4	2.32193	209	227	-	218	-168	14.7876	5.16e-06	0.226	TACAGTTGGCCTTTATATA	N	X	SAME
FBgn0030801-X-16778363-16778663+.fasta	FBgn0030801	X	X	+	NA	NA	NA	0	0	193	211	-	202	-49	14.7876	5.16e-06	0.226	TACAGTTGGCCTTTATATA	Y	X	DIFF
FBgn0030834-X-17143484-17143784-.fasta	FBgn0030834	X	X	-	0.238535	ova_avg	2.19802	8	3.16993	229	247	-	238	-188	10.0685	7.84e-05	0.562	TATAGATGTCTTTTATTTT	N	X	SAME
FBgn0030864-X-17603635-17603935-.fasta	FBgn0030864	X	X	-	0.777693	ova_avg	6.74464	26	4.75489	245	263	+	254	-204	10.0685	7.84e-05	0.562	TAATGTTGGCAACGAAATT	N	X	DIFF
FBgn0030918-X-18309295-18309595+.fasta	FBgn0030918	X	X	+	0.943733	tes_avg	7.16178	8	3.16993	163	181	+	172	-79	10.9893	4.92e-05	0.503	CGAAGTAAGCATTTCATAA	Y	X	SAME
FBgn0030933-X-18408792-18409092-.fasta	FBgn0030933	X	X	-	0.87997	acg_avg	9.45172	165	7.37504	99	117	-	108	-58	11.3346	4.1e-05	0.469	CCCAGCAGGCGATGTGCTT	Y	X	SAME
FBgn0030938-X-18422465-18422765+.fasta	FBgn0030938	X	X	+	1	ova_avg	0	1	1	70	88	+	79	-172	11.6799	3.4e-05	0.446	TTTAGTAAGCTTTACTTTT	N	X	SAME
FBgn0030940-X-18511571-18511871-.fasta	FBgn0030940	X	X	-	0.855558	tes_avg	6.74653	47	5.58496	113	131	-	122	-72	14.2121	7.55e-06	0.255	TCAAGATGGCCATGAAAAA	Y	X	SAME
FBgn0030951-X-18633877-18634177-.fasta	FBgn0030951	X	X	-	0.983738	tes_avg	8.60852	201	7.65821	206	224	+	215	-165	12.946	1.66e-05	0.35	GCAAGCTAGCTTAGATTTT	N	X	DIFF
FBgn0030983-X-19018370-19018670-.fasta	FBgn0030983	X	X	-	0.992129	tes_avg	6.32705	7	3	110	128	-	119	-69	11.9101	3e-05	0.431	TTAAGTATGCCCAGACTTT	Y	X	SAME
FBgn0031002-X-19135822-19136122-.fasta	FBgn0031002	X	X	-	0.614569	lfb_avg	0	1	1	162	180	-	171	-121	11.5648	3.62e-05	0.448	AGCAGTGGGCGCTGCTATT	N	X	SAME
FBgn0031074-X-19717981-19718281-.fasta	FBgn0031074	X	X	-	1	tes_avg	5.15983	18	4.24793	54	72	+	63	-13	12.6007	2.03e-05	0.374	TTCAGTTTGCGTTGCCTCT	Y	X	DIFF
FBgn0031082-X-19896078-19896378-.fasta	FBgn0031082	X	X	-	0.972735	tes_avg	8.22793	96	6.59991	47	65	-	56	-6	14.5574	6.02e-06	0.237	CAAAGCAGGCTATGTGATT	Y	X	SAME
FBgn0031101-X-20198220-20198520+.fasta	FBgn0031101	X	X	+	0.968181	tes_avg	8.71173	45	5.52356	115	133	+	124	-127	11.2195	4.36e-05	0.483	TGCAGTTGGCATAAAATTT	N	X	SAME
FBgn0031103-X-20247498-20247798-.fasta	FBgn0031103	X	X	-	0.975721	tes_avg	10.2146	243	7.93074	104	122	-	113	-63	11.795	3.2e-05	0.442	CAGAGTTGGCCTGGACTCG	Y	X	SAME
FBgn0031108-X-20284557-20284857-.fasta	FBgn0031108	X	X	-	0.993184	tes_avg	9.1146	352	8.46352	86	104	-	95	-45	14.6725	5.57e-06	0.229	TCTAGTTGGCCGAGCTTTG	Y	X	SAME
FBgn0031127-X-20539104-20539404+.fasta	FBgn0031127	X	X	+	0.863593	tes_avg	10.0021	51	5.70044	189	207	+	198	-53	20.7728	2.46e-08	0.0164	CGCAGTATGCCTTGATTTT	Y	X	SAME
FBgn0031128-X-20546759-20547059-.fasta	FBgn0031128	X	X	-	0.907137	tes_avg	10.7927	257	8.01123	69	87	-	78	-28	15.248	3.75e-06	0.206	CAAAGGAGCCATTGATTTT	Y	X	SAME
FBgn0031129-X-20606936-20607236-.fasta	FBgn0031129	X	X	-	0.962065	tes_avg	10.6225	723	9.49985	131	149	-	140	-90	12.1403	2.64e-05	0.414	AGCAGCAGGCGGGGCATTC	N	X	SAME
FBgn0031130-X-20616925-20617225-.fasta	FBgn0031130	X	X	-	0.966474	tes_avg	9.67398	117	6.88264	90	108	-	99	-49	18.1255	3.85e-07	0.0787	GGCAGGAGGCTTTGATTTT	Y	X	SAME
FBgn0031150-X-20924739-20925039+.fasta	FBgn0031150	X	X	+	0.243179	ova_avg	4.57217	5	2.58496	96	114	-	105	-146	11.5648	3.62e-05	0.448	ACAAGTAATCCTGGACATC	N	X	DIFF
FBgn0031164-X-21074317-21074617-.fasta	FBgn0031164	X	X	-	0.972003	tes_avg	8.25165	47	5.58496	38	56	+	47	4	12.8309	1.77e-05	0.357	TGAAGTTAGCCTGGCTTAC	N	X	DIFF
FBgn0031168-X-21122124-21122424-.fasta	FBgn0031168	X	X	-	0.784857	tes_avg	8.29094	87	6.45943	81	99	-	90	-40	12.2554	2.47e-05	0.409	ACAAGTAGGCACTACGTTT	Y	X	SAME
FBgn0031176-X-21273714-21274014-.fasta	FBgn0031176	X	X	-	0.843385	asg_avg	0	1	1	229	247	-	238	-188	12.946	1.66e-05	0.35	ACCAGTTGGCCAAGTATTT	N	X	SAME
FBgn0031189-X-21875283-21875583+.fasta	FBgn0031189	X	X	+	0.315349	ova_avg	4.33759	3	2	180	198	+	189	-62	9.60809	9.8e-05	0.582	TTCAGCTAGCTTGGGCTTT	Y	X	SAME
FBgn0031194-X-21942168-21942468-.fasta	FBgn0031194	X	X	-	0.150066	lsg_avg	3.67102	3	2	110	128	+	119	-69	11.2195	4.36e-05	0.483	CAAAAATGGCTATGCCATT	Y	X	DIFF
FBgn0031240-2L-268837-269137+.fasta	FBgn0031240	2L	A	+	0.941395	tes_avg	10.4843	212	7.73471	235	253	+	244	-7	12.3705	2.32e-05	0.396	TAAAGTAGGCGGGGCTACT	Y	A	SAME
FBgn0031244-2L-283230-283530-.fasta	FBgn0031244	2L	A	-	0.216174	acr_avg	7.93251	22	4.52356	207	225	+	216	-166	12.8309	1.77e-05	0.357	CAAAGATGGCGTTGAATCA	N	A	DIFF
FBgn0031285-2L-821171-821471+.fasta	FBgn0031285	2L	A	+	0.114565	ejd_avg	10.2983	83	6.39232	34	52	+	43	-208	12.7158	1.9e-05	0.362	ACAAGTAAGCAATTCGTTT	N	A	SAME
FBgn0031313-2L-1163835-1164135-.fasta	FBgn0031313	2L	A	-	0.434986	acr_avg	5.16287	4	2.32193	278	296	-	287	-237	10.0685	7.84e-05	0.562	TTTAATTGGCTTGGATTTC	N	A	SAME
FBgn0031324-2L-1203964-1204264+.fasta	FBgn0031324	2L	A	+	NA	NA	NA	0	0	159	177	-	168	-83	10.7591	5.54e-05	0.524	GGCTGTTGGCAGGGAGTTT	N	A	DIFF
FBgn0031343-2L-1500557-1500857-.fasta	FBgn0031343	2L	A	-	0.928295	tes_avg	9.75147	168	7.40088	223	241	-	232	-182	10.8742	5.22e-05	0.511	CCGAGTTATCCTTGATATA	N	A	SAME
FBgn0031361-2L-1732305-1732605-.fasta	FBgn0031361	2L	A	-	0.226175	ltu_avg	4.59855	5	2.58496	91	109	-	100	-50	11.1044	4.63e-05	0.49	AACAGCAGGCTATAAATTA	Y	A	SAME
FBgn0031365-2L-1759042-1759342-.fasta	FBgn0031365	2L	A	-	0.8113	tes_avg	8.67549	38	5.2854	69	87	-	78	-28	9.72319	9.27e-05	0.577	CTCAGCAGGCCCTTGATTT	Y	A	SAME
FBgn0031372-2L-1869552-1869852+.fasta	FBgn0031372	2L	A	+	0.969446	tes_avg	8.67795	213	7.74147	124	142	+	133	-118	10.7591	5.54e-05	0.524	TCCAGTAAGCTTGGCTCAT	N	A	SAME
FBgn0031430-2L-2517986-2518286-.fasta	FBgn0031430	2L	A	-	0.983518	tes_avg	8.52735	62	5.97728	90	108	-	99	-49	10.0685	7.84e-05	0.562	CAAAGTTGGCAGTTTGTTG	Y	A	SAME
FBgn0031443-2L-2655143-2655443+.fasta	FBgn0031443	2L	A	+	NA	NA	NA	70	6.14975	187	205	+	196	-55	9.95339	8.3e-05	0.562	CTTAGTAGCCCAGTCATTT	Y	A	SAME
FBgn0031457-2L-2765614-2765914-.fasta	FBgn0031457	2L	A	-	0.154775	ahg_avg	5.84627	15	4	202	220	+	211	-161	9.72319	9.27e-05	0.577	TTTAGTAGGCTACAATTTT	N	A	DIFF
FBgn0031459-2L-2769884-2770184+.fasta	FBgn0031459	2L	A	+	0.087998	lsg_avg	8.8779	32	5.04439	246	264	+	255	5	15.8235	2.48e-06	0.179	CCAAGTTGGCAGCGCTATT	N	A	SAME
FBgn0031460-2L-2771725-2772025-.fasta	FBgn0031460	2L	A	-	0.853056	tes_avg	8.03452	150	7.2384	178	196	+	187	-137	13.0611	1.55e-05	0.344	TAAAGTAGGCGAAGATTTG	N	A	DIFF
FBgn0031463-2L-2815709-2816009-.fasta	FBgn0031463	2L	A	-	0.807945	tes_avg	7.66812	10	3.45943	54	72	-	63	-13	9.95339	8.3e-05	0.562	ACAAGCAGGCCATAACAAA	Y	A	SAME
FBgn0031465-2L-2825455-2825755-.fasta	FBgn0031465	2L	A	-	0.989489	tes_avg	6.11764	5	2.58496	79	97	-	88	-38	9.60809	9.8e-05	0.582	TCAAGTAGGCGTTTTAACT	Y	A	SAME
FBgn0031466-2L-2837782-2838082-.fasta	FBgn0031466	2L	A	-	0.932219	lhg_avg	0	0	0	54	72	+	63	-13	10.4138	6.6e-05	0.543	GACAGCTGGCCGTTTGTTT	Y	A	DIFF
FBgn0031469-2L-2844462-2844762-.fasta	FBgn0031469	2L	A	-	0.954373	tes_avg	5.6802	10	3.45943	140	158	+	149	-99	11.6799	3.4e-05	0.446	GAAAGTGGTCTTTGTATTT	N	A	DIFF
FBgn0031483-2L-2976808-2977108-.fasta	FBgn0031483	2L	A	-	0.584015	ova_avg	8.97899	151	7.24793	92	110	-	101	-51	18.2406	3.47e-07	0.0787	CAAAGCAGGCCAGGATTTG	Y	A	SAME
FBgn0031484-2L-2976881-2977181+.fasta	FBgn0031484	2L	A	+	0.237301	ova_avg	7.71536	82	6.37504	19	37	-	28	-223	18.2406	3.47e-07	0.0787	CAAAGCAGGCCAGGATTTG	N	A	DIFF
FBgn0031493-2L-3029117-3029417-.fasta	FBgn0031493	2L	A	-	0.179498	lcns_avg	6.57706	23	4.58496	108	126	+	117	-67	10.8742	5.22e-05	0.511	TCAAGCTGGCAACGCAAAG	Y	A	DIFF
FBgn0031494-2L-3029002-3029302+.fasta	FBgn0031494	2L	A	+	0.267055	fsv_avg	5.75822	1	1	223	241	+	232	-19	10.8742	5.22e-05	0.511	TCAAGCTGGCAACGCAAAG	Y	A	SAME
FBgn0031515-2L-3294655-3294955-.fasta	FBgn0031515	2L	A	-	0.501438	lfb_avg	6.14221	2	1.58496	152	170	-	161	-111	13.2913	1.35e-05	0.321	AGAAGTATGCCACGAATTG	N	A	SAME
FBgn0031531-2L-3410359-3410659+.fasta	FBgn0031531	2L	A	+	0.959995	tes_avg	10.1303	202	7.66534	188	206	+	197	-54	16.7443	1.23e-06	0.119	CACAGCAGGCTTTGAATAG	Y	A	SAME
FBgn0031536-2L-3457007-3457307-.fasta	FBgn0031536	2L	A	-	0.231293	lsg_avg	5.88393	8	3.16993	174	192	+	183	-133	10.1836	7.41e-05	0.557	TTAAGTAATCTTTAATTTT	N	A	DIFF
FBgn0031537-2L-3457078-3457378+.fasta	FBgn0031537	2L	A	+	0.121227	asg_avg	5.44496	8	3.16993	103	121	+	112	-139	10.1836	7.41e-05	0.557	TTAAGTAATCTTTAATTTT	N	A	SAME
FBgn0031540-2L-3469956-3470256-.fasta	FBgn0031540	2L	A	-	0.59488	ova_avg	1.6232	1	1	188	206	+	197	-147	14.6725	5.57e-06	0.229	ACAAGTAGGCCAGGAAAAG	N	A	DIFF
FBgn0031545-2L-3519600-3519900-.fasta	FBgn0031545	2L	A	-	0.957865	tes_avg	11.2769	2288	11.1605	107	125	-	116	-66	11.5648	3.62e-05	0.448	CGAAGCAGGCCATTCCAAA	Y	A	SAME
FBgn0031546-2L-3519426-3519726+.fasta	FBgn0031546	2L	A	+	0.976598	tes_avg	9.43019	155	7.2854	281	299	-	290	40	11.5648	3.62e-05	0.448	CGAAGCAGGCCATTCCAAA	N	A	DIFF
FBgn0031580-2L-4005790-4006090+.fasta	FBgn0031580	2L	A	+	0.857555	lmg_avg	2.3908	2	1.58496	16	34	-	25	-226	10.2987	7e-05	0.547	TCAAGGTTTCCATGAATCA	N	A	DIFF
FBgn0031592-2L-4279264-4279564-.fasta	FBgn0031592	2L	A	-	0.956522	tes_avg	5.98022	18	4.24793	39	57	+	48	3	11.4497	3.86e-05	0.458	GCAAGCTAGCTTTGCTAAA	N	A	DIFF
FBgn0031600-2L-4393825-4394125-.fasta	FBgn0031600	2L	A	-	0.205022	lsg_avg	7.44352	20	4.39232	276	294	+	285	-235	9.95339	8.3e-05	0.562	ATAGGCAGGCATTTACTTT	N	A	DIFF
FBgn0031626-2L-4734407-4734707-.fasta	FBgn0031626	2L	A	-	0.930129	tes_avg	9.7787	107	6.75489	89	107	-	98	-48	11.9101	3e-05	0.431	ATTAGTTGGCGTAGCTTTT	Y	A	SAME
FBgn0031630-2L-4812758-4813058+.fasta	FBgn0031630	2L	A	+	0.844088	ltr_avg	3.69533	0	0	115	133	+	124	-127	10.0685	7.84e-05	0.562	TTATGCTGGCCGAGCATTT	N	A	SAME
FBgn0031635-2L-4837948-4838248-.fasta	FBgn0031635	2L	A	-	0.113719	afb_avg	7.20051	12	3.70044	223	241	-	232	-182	11.5648	3.62e-05	0.448	AAAAGTTTGCTTCGATTTA	N	A	SAME
FBgn0031636-2L-4838096-4838396+.fasta	FBgn0031636	2L	A	+	0.416181	lmg_avg	7.71721	7	3	75	93	-	84	-167	11.5648	3.62e-05	0.448	AAAAGTTTGCTTCGATTTA	N	A	DIFF
FBgn0031636-2L-4838096-4838396+.fasta	FBgn0031636	2L	A	+	0.416181	lmg_avg	7.71721	7	3	191	209	-	200	-51	10.7591	5.54e-05	0.524	GGAAGTGGGCATTGAGCTC	Y	A	DIFF
FBgn0031710-2L-5523826-5524126-.fasta	FBgn0031710	2L	A	-	0.110622	lsg_avg	5.62341	18	4.24793	279	297	+	288	-238	13.4064	1.25e-05	0.313	ACAAGCAATCAATGAGTTT	N	A	DIFF
FBgn0031711-2L-5523888-5524188+.fasta	FBgn0031711	2L	A	+	0.159087	tes_avg	9.1717	111	6.80735	217	235	+	226	-25	13.4064	1.25e-05	0.313	ACAAGCAATCAATGAGTTT	Y	A	SAME
FBgn0031739-2L-5801924-5802224-.fasta	FBgn0031739	2L	A	-	0.236247	ova_avg	4.74586	6	2.80735	263	281	+	272	-222	10.2987	7e-05	0.547	CTCAGGAATCTAGGCATTT	N	A	DIFF
FBgn0031740-2L-5801969-5802269+.fasta	FBgn0031740	2L	A	+	0.213887	lcns_avg	4.17609	7	3	218	236	+	227	-24	10.2987	7e-05	0.547	CTCAGGAATCTAGGCATTT	Y	A	SAME
FBgn0031751-2L-5923602-5923902-.fasta	FBgn0031751	2L	A	-	0.749322	tes_avg	12.1279	8584	13.0676	92	110	-	101	-51	10.7591	5.54e-05	0.524	CACAGGAGGCTGGGGGTTT	Y	A	SAME
FBgn0031853-2L-6732615-6732915+.fasta	FBgn0031853	2L	A	+	0.99103	tes_avg	9.34832	255	8	257	275	+	266	16	15.5933	2.94e-06	0.189	AGCAGTAAGCTTTGATTTA	N	A	SAME
FBgn0031859-2L-6802738-6803038-.fasta	FBgn0031859	2L	A	-	0.722987	tes_avg	4.73493	505	8.98299	114	132	-	123	-73	22.4993	2.22e-09	0.00818	ACAAGTTGGCCTTGCATTT	Y	A	SAME
FBgn0031860-2L-6802760-6803060+.fasta	FBgn0031860	2L	A	+	0.679228	afb_avg	0	1	1	92	110	-	101	-150	22.4993	2.22e-09	0.00818	ACAAGTTGGCCTTGCATTT	N	A	DIFF
FBgn0031861-2L-6805741-6806041-.fasta	FBgn0031861	2L	A	-	0.978701	tes_avg	9.06818	88	6.47573	67	85	-	76	-26	17.4349	7.01e-07	0.0939	AAAAGTATGCTTTGCTTTT	Y	A	SAME
FBgn0031869-2L-6942763-6943063-.fasta	FBgn0031869	2L	A	-	0.777791	acg_avg	4.15236	5	2.58496	180	198	-	189	-139	11.6799	3.4e-05	0.446	TTCAATTGGCTTGGACTTG	N	A	SAME
FBgn0031947-2L-7782606-7782906+.fasta	FBgn0031947	2L	A	+	0.385089	ova_avg	5.2044	15	4	36	54	+	45	-206	10.0685	7.84e-05	0.562	TAAAGTATTCTTTCACTTT	N	A	SAME
FBgn0031951-2L-7799916-7800216+.fasta	FBgn0031951	2L	A	+	0.217896	ova_avg	5.205	13	3.80735	194	212	+	203	-48	11.2195	4.36e-05	0.483	ACAGGGTTGCCTTGACTTA	Y	A	SAME
FBgn0031954-2L-7840230-7840530+.fasta	FBgn0031954	2L	A	+	0.952197	tes_avg	8.47627	51	5.70044	76	94	-	85	-166	14.6725	5.57e-06	0.229	GAAAGTAGTCCTTGCATAA	N	A	DIFF
FBgn0031981-2L-8043220-8043520+.fasta	FBgn0031981	2L	A	+	0.238947	ltr_avg	2.19369	3	2	153	171	+	162	-89	10.1836	7.41e-05	0.557	TGAAAGTGGCATTGCCATC	N	A	SAME
FBgn0032000-2L-8212851-8213151-.fasta	FBgn0032000	2L	A	-	0.166673	ltu_avg	7.84977	43	5.45943	273	291	+	282	-232	12.3705	2.32e-05	0.396	AGCAGTTGCCATTGCGTTG	N	A	DIFF
FBgn0032023-2L-8338036-8338336+.fasta	FBgn0032023	2L	A	+	0.902249	abr_avg	0	0	0	232	250	+	241	-10	15.5933	2.94e-06	0.189	CCAAGTTGGCCAGCAATTT	Y	A	SAME
FBgn0032067-2L-8772293-8772593-.fasta	FBgn0032067	2L	A	-	0.965461	amg_avg	0	0	0	118	136	+	127	-77	12.946	1.66e-05	0.35	CTAAGAAGGCATTGATAAG	Y	A	DIFF
FBgn0032094-2L-9076870-9077170+.fasta	FBgn0032094	2L	A	+	0.991056	tes_avg	6.04805	4	2.32193	280	298	+	289	39	10.8742	5.22e-05	0.511	TAAAGTAGGCTGTGTAAAA	N	A	SAME
FBgn0032096-2L-9111563-9111863+.fasta	FBgn0032096	2L	A	+	0.892689	lhg_avg	0	0	0	203	221	+	212	-39	14.4423	6.49e-06	0.246	CGAAATTGGCTGTGAAATT	Y	A	SAME
FBgn0032101-2L-9166463-9166763-.fasta	FBgn0032101	2L	A	-	0.141942	lsg_avg	7.48038	83	6.39232	76	94	-	85	-35	12.4856	2.17e-05	0.38	GTCAGTTGGCAGTGCTACT	Y	A	SAME
FBgn0032105-2L-9253067-9253367-.fasta	FBgn0032105	2L	A	-	0.695048	ova_avg	7.88304	16	4.08746	51	69	+	60	-10	12.0252	2.81e-05	0.43	GCCAGATGGCTTTTCATTG	Y	A	DIFF
FBgn0032111-2L-9350219-9350519+.fasta	FBgn0032111	2L	A	+	0.964667	tes_avg	10.1108	162	7.34873	190	208	+	199	-52	14.4423	6.49e-06	0.246	TCCAGCAAGCCTTGATCTA	Y	A	SAME
FBgn0032115-2L-9397937-9398237-.fasta	FBgn0032115	2L	A	-	0.935451	tes_avg	9.45553	68	6.10852	280	298	+	289	-239	10.0685	7.84e-05	0.562	CGCAGATGCCATCGATTTT	N	A	DIFF
FBgn0032126-2L-9543920-9544220+.fasta	FBgn0032126	2L	A	+	0.976693	ova_avg	0	0	0	80	98	+	89	-162	10.2987	7e-05	0.547	TACAGGTGGCTTCGATACT	N	A	SAME
FBgn0032149-2L-9790631-9790931+.fasta	FBgn0032149	2L	A	+	0.146051	ltr_avg	5.83577	21	4.45943	100	118	-	109	-142	13.8668	9.42e-06	0.274	TCTAGTATGCTCGGATTTT	N	A	DIFF
FBgn0032188-2L-10172451-10172751+.fasta	FBgn0032188	2L	A	+	0.988857	tes_avg	5.32335	4	2.32193	105	123	-	114	-137	10.9893	4.92e-05	0.503	GCTAGCTTGCCTTTCTTAT	N	A	DIFF
FBgn0032228-2L-10356546-10356846-.fasta	FBgn0032228	2L	A	-	0.897928	ova_avg	3.08632	0	0	49	67	-	58	-8	11.2195	4.36e-05	0.483	CACAGCTGGCCATGGCTAA	Y	A	SAME
FBgn0032229-2L-10356544-10356844+.fasta	FBgn0032229	2L	A	+	0.202148	tes_avg	10.5964	186	7.54689	51	69	-	60	-191	11.2195	4.36e-05	0.483	CACAGCTGGCCATGGCTAA	N	A	DIFF
FBgn0032231-2L-10366441-10366741+.fasta	FBgn0032231	2L	A	+	0.234311	ova_avg	7.66559	68	6.10852	34	52	-	43	-208	11.5648	3.62e-05	0.448	TGTAGCTTCCCTTGCCTTG	N	A	DIFF
FBgn0032268-2L-10567004-10567304+.fasta	FBgn0032268	2L	A	+	0.963129	tes_avg	9.94151	228	7.8392	259	277	+	268	18	12.3705	2.32e-05	0.396	GTTAGATAGCTTTGCTTTT	N	A	SAME
FBgn0032311-2L-10869916-10870216+.fasta	FBgn0032311	2L	A	+	0.965067	ova_avg	0.510062	0	0	41	59	+	50	-201	9.95339	8.3e-05	0.562	CAAAGTTTGCAACGCAAAT	N	A	SAME
FBgn0032313-2L-10901734-10902034-.fasta	FBgn0032313	2L	A	-	0.955955	tes_avg	8.30008	26	4.75489	83	101	-	92	-42	13.9819	8.76e-06	0.272	CAAAGTTTGCTTTGCCTAA	Y	A	SAME
FBgn0032315-2L-10910597-10910897-.fasta	FBgn0032315	2L	A	-	1	tes_avg	5.87763	54	5.78136	63	81	-	72	-22	9.95339	8.3e-05	0.562	AATGGCAGGCAATGATTTC	Y	A	SAME
FBgn0032360-2L-11343212-11343512-.fasta	FBgn0032360	2L	A	-	0.956495	tes_avg	11.6968	666	9.38154	95	113	-	104	-54	11.795	3.2e-05	0.442	TCAAGTAAGCATGGAAAAC	Y	A	SAME
FBgn0032372-2L-11694553-11694853+.fasta	FBgn0032372	2L	A	+	0.948527	tes_avg	9.99614	273	8.09803	127	145	-	136	-115	14.9027	4.77e-06	0.219	CCCAGTTGGCCATCATTTA	N	A	DIFF
FBgn0032409-2L-12097587-12097887+.fasta	FBgn0032409	2L	A	+	0.281829	ova_avg	5.21189	7	3	10	28	-	19	-232	11.3346	4.1e-05	0.469	CCCAGCAGTCGATACTTTT	N	A	DIFF
FBgn0032448-2L-12697272-12697572-.fasta	FBgn0032448	2L	A	-	0.97763	tes_avg	9.01773	632	9.30606	247	265	+	256	-206	10.4138	6.6e-05	0.543	AACTGTTGGCTGTGAATTC	N	A	DIFF
FBgn0032505-2L-13347540-13347840+.fasta	FBgn0032505	2L	A	+	0.876294	asg_avg	0	0	0	137	155	-	146	-105	13.4064	1.25e-05	0.313	TGAAGCAGGCCGGCATTTT	N	A	DIFF
FBgn0032512-2L-13373773-13374073-.fasta	FBgn0032512	2L	A	-	0.224202	tes_avg	6.99018	22	4.52356	250	268	-	259	-209	10.0685	7.84e-05	0.562	TGAAGTGTGCCATAATTTA	N	A	SAME
FBgn0032513-2L-13373768-13374068+.fasta	FBgn0032513	2L	A	+	0.25459	tes_avg	9.63887	63	6	255	273	-	264	14	10.0685	7.84e-05	0.562	TGAAGTGTGCCATAATTTA	N	A	DIFF
FBgn0032535-2L-13909389-13909689+.fasta	FBgn0032535	2L	A	+	1	acr_avg	0	1	1	58	76	-	67	-184	9.83829	8.77e-05	0.574	CCCAGTTGGCCATTTGTAA	N	A	DIFF
FBgn0032553-2L-14871971-14872271-.fasta	FBgn0032553	2L	A	-	0.936045	tes_avg	9.05382	31	5	60	78	-	69	-19	12.6007	2.03e-05	0.374	CCATGCGGGCCTTGAACTT	Y	A	SAME
FBgn0032588-2L-16549908-16550208-.fasta	FBgn0032588	2L	A	-	0.835192	tes_avg	10.5578	561	9.13443	112	130	+	121	-71	10.4138	6.6e-05	0.543	CTCAGCATGCTTTAATTTA	Y	A	DIFF
FBgn0032590-2L-16607119-16607419+.fasta	FBgn0032590	2L	A	+	0.923244	tes_avg	10.5157	142	7.15987	246	264	+	255	5	9.95339	8.3e-05	0.562	CTCAGCATGCTTCGAAAAT	N	A	SAME
FBgn0032603-2L-16791317-16791617+.fasta	FBgn0032603	2L	A	+	0.471524	ejd_avg	2.47311	1	1	88	106	+	97	-154	14.2121	7.55e-06	0.255	GTAAGTATGCTTTGAATCT	N	A	SAME
FBgn0032615-2L-16861438-16861738-.fasta	FBgn0032615	2L	A	-	0.747833	lfb_avg	0.825143	0	0	252	270	+	261	-211	12.8309	1.77e-05	0.357	TGCTGTTGGCCTGGAAATG	N	A	DIFF
FBgn0032624-2L-17013003-17013303-.fasta	FBgn0032624	2L	A	-	0.930089	tes_avg	10.4835	232	7.86419	55	73	-	64	-14	10.7591	5.54e-05	0.524	TCCAGTGGGCCTAGACAAA	Y	A	SAME
FBgn0032625-2L-17048017-17048317-.fasta	FBgn0032625	2L	A	-	0.984381	tes_avg	9.22843	60	5.93074	74	92	-	83	-33	11.1044	4.63e-05	0.49	GGTAGTTTGCCCTGCCATA	Y	A	SAME
FBgn0032632-2L-17292151-17292451-.fasta	FBgn0032632	2L	A	-	0.973869	tes_avg	10.4529	213	7.74147	102	120	-	111	-61	10.2987	7e-05	0.547	AAAAGGAGCCCACGATTTT	Y	A	SAME
FBgn0032645-2L-17498770-17499070-.fasta	FBgn0032645	2L	A	-	0.964986	tes_avg	6.35624	19	4.32193	46	64	-	55	-5	12.946	1.66e-05	0.35	CTAAGTAGGCCTGTCAAAT	Y	A	SAME
FBgn0032654-2L-17626295-17626595-.fasta	FBgn0032654	2L	A	-	0.971992	tes_avg	9.74208	370	8.53528	70	88	-	79	-29	9.72319	9.27e-05	0.577	TGAAGCTGCCCAGGAGAAT	Y	A	SAME
FBgn0032663-2L-18092205-18092505-.fasta	FBgn0032663	2L	A	-	1	lmg_avg	0	0	0	252	270	-	261	-211	15.5933	2.94e-06	0.189	CGAAGTTGGCTCTGCTTTC	N	A	SAME
FBgn0032755-2L-19101793-19102093+.fasta	FBgn0032755	2L	A	+	0.9178	tes_avg	11.1672	406	8.66888	147	165	+	156	-95	9.60809	9.8e-05	0.582	TGCAGTAAGCTTTCATATA	N	A	SAME
FBgn0032785-2L-19454005-19454305+.fasta	FBgn0032785	2L	A	+	0.535104	lfb_avg	6.36447	17	4.16993	35	53	+	44	-207	10.2987	7e-05	0.547	TGAAGATTGCTTTTCAATT	N	A	SAME
FBgn0032797-2L-19517141-19517441-.fasta	FBgn0032797	2L	A	-	0.848725	atg_avg	3.83865	0	0	87	105	+	96	-46	10.4138	6.6e-05	0.543	TGAAGTTGGCTGCGATAAG	Y	A	DIFF
FBgn0032817-2L-19756816-19757116-.fasta	FBgn0032817	2L	A	-	0.219889	abr_avg	5.86395	3	2	160	178	-	169	-119	10.1836	7.41e-05	0.557	GAAAGCTTTCCATGCGATG	N	A	SAME
FBgn0032857-2L-20414749-20415049-.fasta	FBgn0032857	2L	A	-	0.845037	tes_avg	8.55642	113	6.83289	267	285	-	276	-226	9.72319	9.27e-05	0.577	ACCAGAGGGCGCTGAATTA	N	A	SAME
FBgn0032867-2L-20614367-20614667+.fasta	FBgn0032867	2L	A	+	0.976668	tes_avg	9.72452	245	7.94251	222	240	+	231	-20	9.72319	9.27e-05	0.577	TCTAATTGGCCCTGACTCA	Y	A	SAME
FBgn0032877-2L-20682117-20682417+.fasta	FBgn0032877	2L	A	+	0.233843	ova_avg	6.45759	4	2.32193	54	72	+	63	-188	10.1836	7.41e-05	0.557	TTAAGTTACCCTAGAATTT	N	A	SAME
FBgn0032877-2L-20682117-20682417+.fasta	FBgn0032877	2L	A	+	0.233843	ova_avg	6.45759	4	2.32193	209	227	-	218	-33	11.1044	4.63e-05	0.49	CCAAGCTATCGTTGCGATA	Y	A	DIFF
FBgn0032973-2L-22108713-22109013+.fasta	FBgn0032973	2L	A	+	0.841045	asg_avg	7.50659	36	5.20945	277	295	+	286	36	9.60809	9.8e-05	0.582	CCCAGTATGCATCGCGCTA	N	A	SAME
FBgn0033000-2R-716500-716800+.fasta	FBgn0033000	2R	A	+	0.161621	ova_avg	6.95962	9	3.32193	269	287	+	278	28	14.6725	5.57e-06	0.229	GAAAGGAGGCCATGCACTT	N	A	SAME
FBgn0033029-2R-1550676-1550976-.fasta	FBgn0033029	2R	A	-	0.151062	ova_avg	6.72598	9	3.32193	153	171	+	162	-112	14.9027	4.77e-06	0.219	CGTAGCAAGCAATGAATTA	N	A	DIFF
FBgn0033042-2R-1682667-1682967+.fasta	FBgn0033042	2R	A	+	0.958671	tes_avg	8.46863	34	5.12928	87	105	-	96	-155	11.1044	4.63e-05	0.49	ACTAGTTGCCATGGCTTTA	N	A	DIFF
FBgn0033069-2R-2088107-2088407+.fasta	FBgn0033069	2R	A	+	0.82846	tes_avg	8.14801	34	5.12928	265	283	+	274	24	14.097	8.13e-06	0.265	CCAAGTTTGCTTTGCTAAG	N	A	SAME
FBgn0033081-2R-2543904-2544204-.fasta	FBgn0033081	2R	A	-	0.303857	ova_avg	7.66465	107	6.75489	233	251	-	242	-192	11.6799	3.4e-05	0.446	TACAGCAAGCTTTTATTTA	N	A	SAME
FBgn0033097-2R-2606987-2607287-.fasta	FBgn0033097	2R	A	-	0.731354	amg_avg	0.795422	0	0	183	201	+	192	-142	12.8309	1.77e-05	0.357	TTAAGTTGGCCGAGCAATG	N	A	DIFF
FBgn0033122-2R-2873297-2873597+.fasta	FBgn0033122	2R	A	+	0.172053	ova_avg	6.18025	16	4.08746	236	254	+	245	-6	10.4138	6.6e-05	0.543	TCTAGCTAGCTTTGCCCAT	Y	A	SAME
FBgn0033141-2R-2961570-2961870-.fasta	FBgn0033141	2R	A	-	0.937426	tes_avg	9.02131	66	6.06609	89	107	-	98	-48	9.95339	8.3e-05	0.562	GGGAGCAGGCAGTGAAATC	Y	A	SAME
FBgn0033149-2R-3063140-3063440+.fasta	FBgn0033149	2R	A	+	0.907372	tes_avg	8.24979	51	5.70044	1	19	-	10	-241	13.1762	1.44e-05	0.333	AGCAGTTGGCCCGGCTTTC	N	A	DIFF
FBgn0033165-2R-3289113-3289413+.fasta	FBgn0033165	2R	A	+	0.970231	acg_avg	0	75	6.24793	123	141	-	132	-119	12.946	1.66e-05	0.35	ACAAGGTAGCTCTGATTTT	N	A	DIFF
FBgn0033168-2R-3316047-3316347-.fasta	FBgn0033168	2R	A	-	0.969156	tes_avg	9.37727	98	6.62936	54	72	-	63	-13	12.2554	2.47e-05	0.409	CTCAGTAAGCAGTGCCCTT	Y	A	SAME
FBgn0033177-2R-3350849-3351149-.fasta	FBgn0033177	2R	A	-	0.437945	tes_avg	8.11732	55	5.80735	10	28	-	19	32	11.4497	3.86e-05	0.458	ACATGTTAGCTTGGATTTT	N	A	SAME
FBgn0033178-2R-3350758-3351058+.fasta	FBgn0033178	2R	A	+	0.128702	afb_avg	5.20871	8	3.16993	101	119	-	110	-141	11.4497	3.86e-05	0.458	ACATGTTAGCTTGGATTTT	N	A	DIFF
FBgn0033216-2R-3602177-3602477+.fasta	FBgn0033216	2R	A	+	0.910304	amg_avg	1.35616	1	1	10	28	-	19	-232	9.83829	8.77e-05	0.574	AAAAGTAGCCAGTGAAACT	N	A	DIFF
FBgn0033229-2R-3719425-3719725+.fasta	FBgn0033229	2R	A	+	NA	NA	NA	17	4.16993	195	213	+	204	-47	9.95339	8.3e-05	0.562	GGCAGTTGGCCGTAACTAA	Y	A	SAME
FBgn0033250-2R-3901209-3901509-.fasta	FBgn0033250	2R	A	-	0.663723	abr_avg	0	1	1	207	225	+	216	-166	13.4064	1.25e-05	0.313	ACTAGCTGTCGGTGCATTT	N	A	DIFF
FBgn0033280-2R-4150732-4151032-.fasta	FBgn0033280	2R	A	-	0.963407	tes_avg	9.66833	228	7.8392	76	94	-	85	-35	14.7876	5.16e-06	0.226	CATAGCAATCATTGAATTT	Y	A	SAME
FBgn0033285-2R-4255381-4255681-.fasta	FBgn0033285	2R	A	-	0.927231	tes_avg	11.4463	2102	11.0382	122	140	-	131	-81	17.3198	7.72e-07	0.0964	TCTAGTAAGCCCTGCATTT	N	A	SAME
FBgn0033287-2R-4258327-4258627+.fasta	FBgn0033287	2R	A	+	0.949187	tes_avg	11.6569	1352	10.4019	187	205	+	196	-55	16.0537	2.1e-06	0.164	AAAAGGATGCCTTGAAATT	Y	A	SAME
FBgn0033289-2R-4298684-4298984-.fasta	FBgn0033289	2R	A	-	0.607874	aeye_avg	3.49181	0	0	267	285	-	276	-226	10.9893	4.92e-05	0.503	CCAAGTGGGCATCGGAATT	N	A	SAME
FBgn0033294-2R-4346069-4346369+.fasta	FBgn0033294	2R	A	+	NA	NA	NA	5	2.58496	254	272	-	263	13	10.8742	5.22e-05	0.511	CCAAGTGGTCATTGCTAAC	N	A	DIFF
FBgn0033313-2R-4501976-4502276+.fasta	FBgn0033313	2R	A	+	0.618314	abr_avg	0	9	3.32193	155	173	+	164	-87	9.60809	9.8e-05	0.582	GCAAGTTGGCAGTCCGATA	N	A	SAME
FBgn0033344-2R-4797803-4798103-.fasta	FBgn0033344	2R	A	-	0.976744	tes_avg	8.87531	84	6.40939	164	182	-	173	-123	13.4064	1.25e-05	0.313	TAAAGAAGGCATTGAAAAG	N	A	SAME
FBgn0033356-2R-4838540-4838840-.fasta	FBgn0033356	2R	A	-	0.151036	atg_avg	8.97487	25	4.70044	157	175	-	166	-116	12.1403	2.64e-05	0.414	CAAAGTTTTCGTTGATTTC	N	A	SAME
FBgn0033375-2R-4985979-4986279-.fasta	FBgn0033375	2R	A	-	0.141151	aeye_avg	4.54436	6	2.80735	261	279	-	270	-220	13.2913	1.35e-05	0.321	TTAAGTAGGCGCTGCAATA	N	A	SAME
FBgn0033395-2R-5124766-5125066+.fasta	FBgn0033395	2R	A	+	0.961098	amg_avg	0	0	0	31	49	-	40	-211	9.72319	9.27e-05	0.577	CCCAATAAGCTTTTCATTG	N	A	DIFF
FBgn0033403-2R-5239109-5239409-.fasta	FBgn0033403	2R	A	-	1	abr_avg	0	0	0	7	25	-	16	35	14.7876	5.16e-06	0.226	TCAAGTTGTCTTTTCCTTT	N	A	SAME
FBgn0033434-2R-5481299-5481599+.fasta	FBgn0033434	2R	A	+	0.148252	amg_avg	9.54596	113	6.83289	166	184	-	175	-76	10.0685	7.84e-05	0.562	TACAATAATCGTTGAATTT	Y	A	DIFF
FBgn0033440-2R-5594790-5595090+.fasta	FBgn0033440	2R	A	+	0.958976	tes_avg	6.74851	44	5.49185	222	240	+	231	-20	19.1614	1.44e-07	0.0596	TCTAGTAGTCCATGATTTT	Y	A	SAME
FBgn0033442-2R-5645522-5645822-.fasta	FBgn0033442	2R	A	-	0.921391	tes_avg	11.0643	280	8.13443	57	75	-	66	-16	12.8309	1.77e-05	0.357	TCTAGTTATCCTGGCGTTG	Y	A	SAME
FBgn0033446-2R-5707507-5707807-.fasta	FBgn0033446	2R	A	-	0.312495	afb_avg	6.74785	102	6.6865	188	206	+	197	-147	19.0463	1.62e-07	0.0596	TACAGTTGGCAATGCCTTT	N	A	DIFF
FBgn0033461-2R-5774902-5775202+.fasta	FBgn0033461	2R	A	+	0.930836	tes_avg	9.11125	23	4.58496	203	221	+	212	-39	16.7443	1.23e-06	0.119	CCCAGTGGGCCTGGATATA	Y	A	SAME
FBgn0033463-2R-5779143-5779443-.fasta	FBgn0033463	2R	A	-	0.300656	ltu_avg	6.47348	11	3.58496	143	161	+	152	-102	12.1403	2.64e-05	0.414	ATTAGCTAGCTATGAAATT	N	A	DIFF
FBgn0033512-2R-6243285-6243585-.fasta	FBgn0033512	2R	A	-	0.955653	tes_avg	11.4051	696	9.44501	62	80	-	71	-21	17.7802	5.22e-07	0.0894	CAAAGCAGGCTGTGAGATT	Y	A	SAME
FBgn0033524-2R-6346346-6346646-.fasta	FBgn0033524	2R	A	-	0.768959	ahg_avg	4.80389	5	2.58496	246	264	+	255	-205	12.946	1.66e-05	0.35	ACTAGTGGGCTTTGGTTTT	N	A	DIFF
FBgn0033543-2R-6618372-6618672-.fasta	FBgn0033543	2R	A	-	0.266014	fsv_avg	4.05167	4	2.32193	72	90	+	81	-31	10.1836	7.41e-05	0.557	CGAAGCTGGCTGCGTCTTA	Y	A	DIFF
FBgn0033558-2R-6721690-6721990-.fasta	FBgn0033558	2R	A	-	0.780398	atg_avg	0	1	1	188	206	+	197	-147	11.5648	3.62e-05	0.448	ACTAGCGGGCAATTACTTT	N	A	DIFF
FBgn0033590-2R-7124140-7124440-.fasta	FBgn0033590	2R	A	-	0.984026	lhg_avg	0	0	0	53	71	-	62	-12	12.6007	2.03e-05	0.374	CCTAGTTGTCATGGCACTT	Y	A	SAME
FBgn0033599-2R-7143761-7144061+.fasta	FBgn0033599	2R	A	+	0.957658	tes_avg	4.47469	3	2	95	113	+	104	-147	11.2195	4.36e-05	0.483	TAAAGATGGCCTTTATTAA	N	A	SAME
FBgn0033614-2R-7190441-7190741-.fasta	FBgn0033614	2R	A	-	NA	NA	NA	0	0	82	100	-	91	-41	13.8668	9.42e-06	0.274	TAAAATGGGCCTTGCGATT	Y	A	SAME
FBgn0033624-2R-7246630-7246930-.fasta	FBgn0033624	2R	A	-	0.140077	lsg_avg	7.60732	202	7.66534	81	99	-	90	-40	10.2987	7e-05	0.547	TGCAGCAGTCGATGAGTAA	Y	A	SAME
FBgn0033639-2R-7539070-7539370-.fasta	FBgn0033639	2R	A	-	0.273774	ltu_avg	6.52276	20	4.39232	219	237	-	228	-178	10.5289	6.23e-05	0.537	AACAGTTTCCATTGCAATT	N	A	SAME
FBgn0033673-2R-7876385-7876685+.fasta	FBgn0033673	2R	A	+	0.407381	tes_avg	8.71536	75	6.24793	210	228	+	219	-32	11.5648	3.62e-05	0.448	GATAGCTAGCATCGATTTT	Y	A	SAME
FBgn0033690-2R-8066007-8066307-.fasta	FBgn0033690	2R	A	-	0.208862	ova_avg	5.34298	6	2.80735	97	115	-	106	-56	10.8742	5.22e-05	0.511	TTTAGCAATCCGTGCATAT	Y	A	SAME
FBgn0033703-2R-8127653-8127953+.fasta	FBgn0033703	2R	A	+	1	lsg_avg	0	0	0	260	278	-	269	19	10.7591	5.54e-05	0.524	CTCAGAAGGCTCTTCATTT	N	A	DIFF
FBgn0033706-2R-8144536-8144836+.fasta	FBgn0033706	2R	A	+	0.984343	tes_avg	9.48284	187	7.55459	139	157	-	148	-103	9.95339	8.3e-05	0.562	GGAAGAGTGCTATGAATTA	N	A	DIFF
FBgn0033710-2R-8193782-8194082+.fasta	FBgn0033710	2R	A	+	0.605425	aeye_avg	5.44053	3	2	2	20	-	11	-240	12.4856	2.17e-05	0.38	ACAAGTGTGCTCTGAGTTT	N	A	DIFF
FBgn0033713-2R-8213569-8213869-.fasta	FBgn0033713	2R	A	-	0.217835	ova_avg	5.25694	6	2.80735	124	142	-	133	-83	9.60809	9.8e-05	0.582	CCAAGCTGTCGATCAAATT	N	A	SAME
FBgn0033748-2R-8398069-8398369-.fasta	FBgn0033748	2R	A	-	NA	NA	NA	35	5.16993	88	106	-	97	-47	21.8087	6.31e-09	0.0125	CCTAGTTGGCCATGACTTT	Y	A	SAME
FBgn0033748-2R-8398069-8398369-.fasta	FBgn0033748	2R	A	-	NA	NA	NA	35	5.16993	230	248	-	239	-189	9.95339	8.3e-05	0.562	GATAGTTGGCCCTAACTTA	N	A	SAME
FBgn0033773-2R-8640390-8640690-.fasta	FBgn0033773	2R	A	-	0.904283	ova_avg	1.39164	0	0	16	34	-	25	26	10.4138	6.6e-05	0.543	TGCAGATGGCTTAGATATG	N	A	SAME
FBgn0033794-2R-9019909-9020209-.fasta	FBgn0033794	2R	A	-	0.968696	tes_avg	9.05435	57	5.85798	48	66	+	57	-7	13.4064	1.25e-05	0.313	TCTAGCTAGCTTTTATTTT	Y	A	DIFF
FBgn0033802-2R-9072566-9072866-.fasta	FBgn0033802	2R	A	-	NA	NA	NA	22	4.52356	261	279	+	270	-220	13.8668	9.42e-06	0.274	GATAGGAGGCAATGCGATT	N	A	DIFF
FBgn0033864-2R-9554990-9555290+.fasta	FBgn0033864	2R	A	+	0.925477	tes_avg	8.35366	24	4.64386	203	221	+	212	-39	11.795	3.2e-05	0.442	CGAAGTTGTCATGAATTTT	Y	A	SAME
FBgn0033865-2R-9580823-9581123-.fasta	FBgn0033865	2R	A	-	0.937825	tes_avg	7.46388	34	5.12928	101	119	-	110	-60	11.4497	3.86e-05	0.458	AATAGTTGGCTCTGAACTT	Y	A	SAME
FBgn0033885-2R-9830831-9831131-.fasta	FBgn0033885	2R	A	-	0.876965	tes_avg	8.00118	77	6.2854	16	34	-	25	26	10.4138	6.6e-05	0.543	TCTAGGATGCTTTCAGTTT	N	A	SAME
FBgn0033888-2R-9860285-9860585-.fasta	FBgn0033888	2R	A	-	0.964309	tes_avg	10.5632	260	8.02791	62	80	-	71	-21	13.9819	8.76e-06	0.272	CCAAGTAGGCCTTTATAAC	Y	A	SAME
FBgn0033905-2R-10056040-10056340+.fasta	FBgn0033905	2R	A	+	0.157212	amg_avg	4.46557	3	2	186	204	+	195	-56	10.0685	7.84e-05	0.562	CCAAGTGAGCATTTAAATC	Y	A	SAME
FBgn0033933-2R-10277950-10278250+.fasta	FBgn0033933	2R	A	+	0.99019	tes_avg	6.55303	3	2	273	291	+	282	32	10.1836	7.41e-05	0.557	GCAAGTTGCCTTTCCTTTT	N	A	SAME
FBgn0033953-2R-10552810-10553110-.fasta	FBgn0033953	2R	A	-	0.948803	tes_avg	11.7182	556	9.12153	96	114	-	105	-55	12.2554	2.47e-05	0.409	TCAAGTAGGCCTTAAGACA	Y	A	SAME
FBgn0033958-2R-10632789-10633089-.fasta	FBgn0033958	2R	A	-	0.866083	abr_avg	0	0	0	40	58	+	49	2	10.7591	5.54e-05	0.524	GCAAGCTGCCCAAGAGTTT	N	A	DIFF
FBgn0033990-2R-10881289-10881589-.fasta	FBgn0033990	2R	A	-	0.497049	tes_avg	7.89611	37	5.24793	148	166	-	157	-107	9.83829	8.77e-05	0.574	TTTTGTGTGCTTTGAATTT	N	A	SAME
FBgn0034011-2R-11215725-11216025-.fasta	FBgn0034011	2R	A	-	0.911589	lfb_avg	2.18105	1	1	84	102	+	93	-43	17.0896	9.34e-07	0.115	GCTAGTGGGCATTGCGTTT	Y	A	DIFF
FBgn0034011-2R-11215725-11216025-.fasta	FBgn0034011	2R	A	-	0.911589	lfb_avg	2.18105	1	1	194	212	-	203	-153	9.83829	8.77e-05	0.574	TCAAAAAAGCCTTTCCTTT	N	A	SAME
FBgn0034012-2R-11218579-11218879+.fasta	FBgn0034012	2R	A	+	0.810676	abr_avg	5.24621	4	2.32193	48	66	+	57	-194	9.72319	9.27e-05	0.577	CAGTGTATGCCGTGCTTTT	N	A	SAME
FBgn0034050-2R-11822079-11822379+.fasta	FBgn0034050	2R	A	+	0.12052	aeye_avg	6.31563	31	5	278	296	-	287	37	9.95339	8.3e-05	0.562	AATAGTTGGCTGTTATATG	N	A	DIFF
FBgn0034092-2R-12110081-12110381-.fasta	FBgn0034092	2R	A	-	0.547227	tes_avg	3.97596	0	0	104	122	+	113	-63	11.9101	3e-05	0.431	TCCAGTTTGCTGCGAGATT	Y	A	DIFF
FBgn0034106-2R-12170689-12170989+.fasta	FBgn0034106	2R	A	+	NA	NA	NA	0	0	191	209	+	200	-51	10.5289	6.23e-05	0.537	TCCGGTTGCCATGGATTTT	Y	A	SAME
FBgn0034114-2R-12209440-12209740+.fasta	FBgn0034114	2R	A	+	0.357833	ova_avg	4.09402	4	2.32193	246	264	+	255	5	12.946	1.66e-05	0.35	CGCAGCTTGCACTGCTATT	N	A	SAME
FBgn0034145-2R-12494908-12495208+.fasta	FBgn0034145	2R	A	+	0.63874	acr_avg	7.44047	21	4.45943	207	225	+	216	-35	15.248	3.75e-06	0.206	CGCAGCAAGCAGTGATTTG	Y	A	SAME
FBgn0034184-2R-12936129-12936429+.fasta	FBgn0034184	2R	A	+	0.265344	atg_avg	6.72703	15	4	91	109	+	100	-151	11.6799	3.4e-05	0.446	ACTAGTTTGCATTACTTTT	N	A	SAME
FBgn0034196-2R-13014477-13014777-.fasta	FBgn0034196	2R	A	-	0.983742	tes_avg	9.15626	109	6.78136	82	100	-	91	-41	10.7591	5.54e-05	0.524	GCGAGATAGCCTGGCATTT	Y	A	SAME
FBgn0034230-2R-13401471-13401771+.fasta	FBgn0034230	2R	A	+	0.220714	atg_avg	5.0407	7	3	213	231	+	222	-29	11.1044	4.63e-05	0.49	GCAAGTAATCGATGATTTC	Y	A	SAME
FBgn0034251-2R-13482521-13482821+.fasta	FBgn0034251	2R	A	+	0.991053	tes_avg	8.24006	94	6.56986	187	205	+	196	-55	16.9745	1.02e-06	0.118	AGTAGTATGCTTTGAATTT	Y	A	SAME
FBgn0034301-2R-13995843-13996143-.fasta	FBgn0034301	2R	A	-	1	aeye_avg	0	0	0	6	24	-	15	36	13.4064	1.25e-05	0.313	TTCAGTTTGCCTGGTTTTT	N	A	SAME
FBgn0034352-2R-14341916-14342216-.fasta	FBgn0034352	2R	A	-	0.89673	tes_avg	8.43433	80	6.33985	92	110	-	101	-51	13.8668	9.42e-06	0.274	ACAAGTAGTCCTGGCAACT	Y	A	SAME
FBgn0034360-2R-14500344-14500644+.fasta	FBgn0034360	2R	A	+	0.765844	ova_avg	0.962505	1	1	173	191	+	182	-69	10.5289	6.23e-05	0.537	CAAAGTTGGCGCTTAATAT	Y	A	SAME
FBgn0034423-2R-15147163-15147463+.fasta	FBgn0034423	2R	A	+	0.966713	tes_avg	7.97516	46	5.55459	165	183	+	174	-77	17.3198	7.72e-07	0.0964	GGCAGTAGGCTGTGCAATT	Y	A	SAME
FBgn0034435-2R-15229063-15229363+.fasta	FBgn0034435	2R	A	+	0.884821	tes_avg	11.3741	309	8.27612	276	294	+	285	35	9.95339	8.3e-05	0.562	CGCAGCGAGCAGTGCTCTT	N	A	SAME
FBgn0034446-2R-15331433-15331733+.fasta	FBgn0034446	2R	A	+	1	aeye_avg	0	0	0	152	170	+	161	-90	13.8668	9.42e-06	0.274	TGAAGGTGGCCATAAGTTT	N	A	SAME
FBgn0034454-2R-15385006-15385306+.fasta	FBgn0034454	2R	A	+	0.89951	fsv_avg	0	0	0	197	215	-	206	-45	10.2987	7e-05	0.547	TGGTGTTGGCGTTGCTTTT	Y	A	DIFF
FBgn0034461-2R-15530201-15530501+.fasta	FBgn0034461	2R	A	+	0.910097	tes_avg	10.2107	109	6.78136	240	258	+	249	-2	14.9027	4.77e-06	0.219	GAAAGTAGTCATTGCATAT	Y	A	SAME
FBgn0034468-2R-15584977-15585277+.fasta	FBgn0034468	2R	A	+	0.898954	ltr_avg	4.44474	4	2.32193	138	156	-	147	-104	11.5648	3.62e-05	0.448	AGCTGATGGCTTTGCTTTT	N	A	DIFF
FBgn0034472-2R-15601330-15601630+.fasta	FBgn0034472	2R	A	+	0.922562	tes_avg	11.3464	390	8.61102	180	198	+	189	-62	15.4782	3.19e-06	0.189	TCAAGAAGCCTTTGAATTT	Y	A	SAME
FBgn0034473-2R-15658687-15658987-.fasta	FBgn0034473	2R	A	-	0.988784	acg_avg	0.740521	0	0	258	276	+	267	-217	11.9101	3e-05	0.431	GCCAGATGGCCTTCAATTA	N	A	DIFF
FBgn0034474-2R-15671497-15671797-.fasta	FBgn0034474	2R	A	-	0.945876	ejd_avg	0.802742	136	7.09803	276	294	-	285	-235	12.4856	2.17e-05	0.38	TGCAGAATGCATTGCTATA	N	A	SAME
FBgn0034480-2R-15892441-15892741-.fasta	FBgn0034480	2R	A	-	0.578872	amg_avg	7.07834	13	3.80735	169	187	+	178	-128	12.4856	2.17e-05	0.38	CTCTGTAGGCCTGGCAATA	N	A	DIFF
FBgn0034511-2R-16413549-16413849+.fasta	FBgn0034511	2R	A	+	NA	NA	NA	4	2.32193	164	182	-	173	-78	13.8668	9.42e-06	0.274	CCCTGTAAGCTGTGAATTT	Y	A	DIFF
FBgn0034512-2R-16421766-16422066+.fasta	FBgn0034512	2R	A	+	0.286351	fsv_avg	5.86197	67	6.08746	224	242	+	233	-18	9.95339	8.3e-05	0.562	AATAGCTGGCATCGCACTT	Y	A	SAME
FBgn0034527-2R-16505757-16506057+.fasta	FBgn0034527	2R	A	+	0.189003	ova_avg	6.69852	15	4	48	66	-	57	-194	10.0685	7.84e-05	0.562	CGCAGTTGCCTTTGCGAAG	N	A	DIFF
FBgn0034554-2R-16751035-16751335+.fasta	FBgn0034554	2R	A	+	0.989769	tes_avg	8.28688	25	4.70044	208	226	+	217	-34	11.1044	4.63e-05	0.49	AATAGATAGCCTGGCTTTG	Y	A	SAME
FBgn0034566-2R-16866575-16866875+.fasta	FBgn0034566	2R	A	+	NA	NA	NA	218	7.77479	249	267	+	258	8	14.4423	6.49e-06	0.246	CTCAGTTGGCTCTGATTAT	N	A	SAME
FBgn0034572-2R-16899224-16899524+.fasta	FBgn0034572	2R	A	+	0.146427	lcns_avg	5.07361	7	3	156	174	+	165	-86	9.95339	8.3e-05	0.562	AAAAGTAGTCATTTACATA	N	A	SAME
FBgn0034605-2R-17105233-17105533-.fasta	FBgn0034605	2R	A	-	0.646031	acr_avg	0	0	0	13	31	-	22	29	11.9101	3e-05	0.431	AATAGTTGGCTTCGCCTTC	N	A	SAME
FBgn0034649-2R-17557370-17557670-.fasta	FBgn0034649	2R	A	-	NA	NA	NA	47	5.58496	238	256	-	247	-197	10.5289	6.23e-05	0.537	CGCAGCAGGCGGGGTATTC	N	A	SAME
FBgn0034650-2R-17557406-17557706+.fasta	FBgn0034650	2R	A	+	0.322111	ova_avg	7.26038	94	6.56986	202	220	-	211	-40	10.5289	6.23e-05	0.537	CGCAGCAGGCGGGGTATTC	Y	A	DIFF
FBgn0034666-2R-17748079-17748379+.fasta	FBgn0034666	2R	A	+	NA	NA	NA	0	0	279	297	+	288	38	11.2195	4.36e-05	0.483	TGAAGCTTCCATGGATTTT	N	A	SAME
FBgn0034667-2R-17754313-17754613-.fasta	FBgn0034667	2R	A	-	0.967713	tes_avg	5.45939	7	3	257	275	+	266	-216	12.6007	2.03e-05	0.374	TTAAATAAGCCTTGCATTC	N	A	DIFF
FBgn0034671-2R-17842299-17842599-.fasta	FBgn0034671	2R	A	-	0.843405	tes_avg	8.72923	80	6.33985	74	92	-	83	-33	11.795	3.2e-05	0.442	TGAAGGAGTCTTTGAATAC	Y	A	SAME
FBgn0034745-2R-18500830-18501130-.fasta	FBgn0034745	2R	A	-	0.979125	tes_avg	9.19843	61	5.9542	147	165	+	156	-106	14.7876	5.16e-06	0.226	CTAAGTATGCTTTTAATTT	N	A	DIFF
FBgn0034755-2R-18537204-18537504-.fasta	FBgn0034755	2R	A	-	0.619126	ltr_avg	0	0	0	236	254	+	245	-195	12.4856	2.17e-05	0.38	CCAAGCATGCGTCGAATAT	N	A	DIFF
FBgn0034782-2R-18721919-18722219+.fasta	FBgn0034782	2R	A	+	0.95316	lmg_avg	0	0	0	47	65	+	56	-195	11.5648	3.62e-05	0.448	CTCAGAAGTCGATGATATT	N	A	SAME
FBgn0034785-2R-18733273-18733573+.fasta	FBgn0034785	2R	A	+	0.888378	fsv_avg	0	0	0	192	210	+	201	-50	12.7158	1.9e-05	0.362	ATTAGCTGGCATTGCCAAT	Y	A	SAME
FBgn0034786-2R-18741169-18741469-.fasta	FBgn0034786	2R	A	-	0.204019	fsv_avg	5.8955	2	1.58496	189	207	+	198	-148	11.4497	3.86e-05	0.458	TACAGTAAGCACTGAAAAT	N	A	DIFF
FBgn0034793-2R-18773670-18773970+.fasta	FBgn0034793	2R	A	+	0.0687631	ltr_avg	7.42221	66	6.06609	146	164	-	155	-96	11.795	3.2e-05	0.442	CAAAGTTTGCGCTGATTAT	N	A	DIFF
FBgn0034803-2R-18824551-18824851+.fasta	FBgn0034803	2R	A	+	0.129932	asg_avg	7.18861	22	4.52356	241	259	-	250	-1	10.0685	7.84e-05	0.562	TTCAGTTAGCTATTCTTTG	Y	A	DIFF
FBgn0034840-2R-19171585-19171885-.fasta	FBgn0034840	2R	A	-	0.956534	tes_avg	11.5716	875	9.77479	92	110	-	101	-51	9.60809	9.8e-05	0.582	CATAGTAGGCTTTTCCCAT	Y	A	SAME
FBgn0034841-2R-19171552-19171852+.fasta	FBgn0034841	2R	A	+	0.947286	tes_avg	8.80742	77	6.2854	125	143	-	134	-117	9.60809	9.8e-05	0.582	CATAGTAGGCTTTTCCCAT	N	A	DIFF
FBgn0034844-2R-19210931-19211231+.fasta	FBgn0034844	2R	A	+	0.973523	tes_avg	9.99763	238	7.90087	18	36	-	27	-224	11.2195	4.36e-05	0.483	CGAAGTATGCCTTGTAAAC	N	A	DIFF
FBgn0034858-2R-19273765-19274065+.fasta	FBgn0034858	2R	A	+	0.158666	lsg_avg	6.35464	26	4.75489	160	178	-	169	-82	10.8742	5.22e-05	0.511	CATAGCTGTCTTTTATTTG	N	A	DIFF
FBgn0034866-2R-19361225-19361525-.fasta	FBgn0034866	2R	A	-	0.964613	acg_avg	0.576842	0	0	194	212	+	203	-153	13.2913	1.35e-05	0.321	AGCAGTTTGCAATGAATAT	N	A	DIFF
FBgn0034867-2R-19363890-19364190-.fasta	FBgn0034867	2R	A	-	0.958902	acg_avg	2.60662	13	3.80735	197	215	-	206	-156	9.95339	8.3e-05	0.562	GGCAGCTGGCAGTGTAAAT	N	A	SAME
FBgn0034869-2R-19386923-19387223+.fasta	FBgn0034869	2R	A	+	1	tes_avg	4.90141	4	2.32193	218	236	+	227	-24	9.72319	9.27e-05	0.577	CGCAGGAGGCCAGGGAATC	Y	A	SAME
FBgn0034876-2R-19435439-19435739-.fasta	FBgn0034876	2R	A	-	0.0797457	ova_avg	8.29362	92	6.53916	251	269	-	260	-210	11.6799	3.4e-05	0.446	AGTGGTTGGCCGTGATTTC	N	A	SAME
FBgn0034877-2R-19435512-19435812+.fasta	FBgn0034877	2R	A	+	0.0597884	ahg_avg	8.83321	124	6.96578	178	196	-	187	-64	11.6799	3.4e-05	0.446	AGTGGTTGGCCGTGATTTC	Y	A	DIFF
FBgn0034880-2R-19444082-19444382+.fasta	FBgn0034880	2R	A	+	0.907514	lcns_avg	0	0	0	196	214	-	205	-46	10.0685	7.84e-05	0.562	AACAGAAGCCGATGCATTT	Y	A	DIFF
FBgn0034882-2R-19489857-19490157+.fasta	FBgn0034882	2R	A	+	0.944954	tes_avg	9.80872	104	6.71425	154	172	-	163	-88	12.0252	2.81e-05	0.43	CCTAGTTGGCGTGGAGAAA	N	A	DIFF
FBgn0034885-2R-19502182-19502482-.fasta	FBgn0034885	2R	A	-	0.358202	afb_avg	3.79362	6	2.80735	170	188	+	179	-129	10.0685	7.84e-05	0.562	ACAAGCAAGCAGTGCGAAG	N	A	DIFF
FBgn0034897-2R-19601174-19601474+.fasta	FBgn0034897	2R	A	+	0.252883	ltu_avg	4.11775	1	1	45	63	+	54	-197	9.95339	8.3e-05	0.562	TATAACTAGCATTGCATTA	N	A	SAME
FBgn0034904-2R-19678668-19678968-.fasta	FBgn0034904	2R	A	-	0.991199	tes_avg	9.01633	351	8.45943	93	111	-	102	-52	18.3557	3.12e-07	0.0787	AGCAGTAGGCCCTGACTTT	Y	A	SAME
FBgn0034907-2R-19692083-19692383+.fasta	FBgn0034907	2R	A	+	0.962392	tes_avg	10.4666	170	7.41785	185	203	+	194	-57	16.7443	1.23e-06	0.119	GCCAGCAGGCTGTGCTTTA	Y	A	SAME
FBgn0034918-2R-19744406-19744706-.fasta	FBgn0034918	2R	A	-	0.227899	ova_avg	6.61446	20	4.39232	16	34	-	25	26	10.8742	5.22e-05	0.511	GCGAGTGGGCATTGTTTTT	N	A	SAME
FBgn0034937-2R-19837919-19838219+.fasta	FBgn0034937	2R	A	+	0.973297	tes_avg	8.73885	105	6.72792	220	238	+	229	-22	11.1044	4.63e-05	0.49	GGTAGAATGCTAGGCATTT	Y	A	SAME
FBgn0034963-2R-19925271-19925571-.fasta	FBgn0034963	2R	A	-	0.133674	ova_avg	7.25378	9	3.32193	150	168	-	159	-109	9.72319	9.27e-05	0.577	TGCAGAAGTCTGTGCAACT	N	A	SAME
FBgn0034964-2R-19925256-19925556+.fasta	FBgn0034964	2R	A	+	0.145942	ova_avg	6.59494	15	4	165	183	-	174	-77	9.72319	9.27e-05	0.577	TGCAGAAGTCTGTGCAACT	Y	A	DIFF
FBgn0034972-2R-19967948-19968248-.fasta	FBgn0034972	2R	A	-	1	aeye_avg	0	0	0	19	37	+	28	23	11.4497	3.86e-05	0.458	CCAAGTAGGCCAGGAAGTT	N	A	DIFF
FBgn0034990-2R-20094395-20094695-.fasta	FBgn0034990	2R	A	-	0.961639	lsg_avg	0.784632	0	0	220	238	+	229	-179	10.2987	7e-05	0.547	CGCAGGTGGCCTAGAAACG	N	A	DIFF
FBgn0034998-2R-20156635-20156935-.fasta	FBgn0034998	2R	A	-	0.837236	tes_avg	7.59347	87	6.45943	223	241	-	232	-182	10.0685	7.84e-05	0.562	GTCAGTTGGCAGTACCTTG	N	A	SAME
FBgn0035006-2R-20340509-20340809-.fasta	FBgn0035006	2R	A	-	0.922844	lmg_avg	6.14739	14	3.90689	241	259	+	250	-200	15.9386	2.28e-06	0.171	TCCAGGAGGCAGTGACTTC	N	A	DIFF
FBgn0035016-2R-20413561-20413861-.fasta	FBgn0035016	2R	A	-	0.312446	abr_avg	3.97552	6	2.80735	205	223	-	214	-164	10.2987	7e-05	0.547	GCAAGTGTCCAATGCTTTT	N	A	SAME
FBgn0035024-2R-20448881-20449181+.fasta	FBgn0035024	2R	A	+	0.132725	asg_avg	8.22867	55	5.80735	19	37	+	28	-223	12.3705	2.32e-05	0.396	CAAAATATGCTTTGAATAT	N	A	SAME
FBgn0035042-2R-20526960-20527260+.fasta	FBgn0035042	2R	A	+	0.958399	acg_avg	2.38773	33	5.08746	56	74	-	65	-186	10.0685	7.84e-05	0.562	TTAAGTAGGCTTTAAAAAA	N	A	DIFF
FBgn0035059-2R-20650436-20650736+.fasta	FBgn0035059	2R	A	+	0.133926	tes_avg	7.45579	51	5.70044	135	153	-	144	-107	10.2987	7e-05	0.547	TTCAGTTGTCCAGGAGTCG	N	A	DIFF
FBgn0035064-2R-20670972-20671272-.fasta	FBgn0035064	2R	A	-	0.155706	ova_avg	4.25911	6	2.80735	160	178	+	169	-119	10.4138	6.6e-05	0.543	CGCAGTTTTCCATGACAAG	N	A	DIFF
FBgn0035070-2R-20736248-20736548+.fasta	FBgn0035070	2R	A	+	NA	NA	NA	0	0	207	225	-	216	-35	14.2121	7.55e-06	0.255	ATCAGCTGGCTAGGAGTTT	Y	A	DIFF
FBgn0035078-2R-20788140-20788440-.fasta	FBgn0035078	2R	A	-	0.947655	tes_avg	6.85119	36	5.20945	4	22	+	13	38	10.0685	7.84e-05	0.562	AGAAAGTGGCTAGGCTTTT	N	A	DIFF
FBgn0035111-3L-212458-212758+.fasta	FBgn0035111	3L	A	+	0.169711	ova_avg	8.4818	21	4.45943	75	93	+	84	-167	11.9101	3e-05	0.431	ATCAGCAGGCGCTGCTTTA	N	A	SAME
FBgn0035120-3L-257925-258225+.fasta	FBgn0035120	3L	A	+	0.316435	lcns_avg	7.53068	20	4.39232	228	246	+	237	-14	10.5289	6.23e-05	0.537	GCTAGGTAGCCCTGAAATA	Y	A	SAME
FBgn0035124-3L-274904-275204+.fasta	FBgn0035124	3L	A	+	0.949352	tes_avg	10.538	130	7.03342	227	245	+	236	-15	14.2121	7.55e-06	0.255	GTTAGTTGGCTCTGAGTTT	Y	A	SAME
FBgn0035139-3L-433855-434155-.fasta	FBgn0035139	3L	A	-	0.975224	tes_avg	9.83133	849	9.73132	31	49	-	40	11	11.5648	3.62e-05	0.448	CTTAGTTTGCAGTTAATTT	N	A	SAME
FBgn0035187-3L-1193122-1193422-.fasta	FBgn0035187	3L	A	-	0.885326	abr_avg	0	0	0	31	49	-	40	11	14.2121	7.55e-06	0.255	TGCAGTTGGCGCTGAGTTG	N	A	SAME
FBgn0035197-3L-1251761-1252061+.fasta	FBgn0035197	3L	A	+	NA	NA	NA	1203	10.2336	218	236	+	227	-24	11.4497	3.86e-05	0.458	TCCAGTAGCCCTCGCAAAT	Y	A	SAME
FBgn0035198-3L-1251761-1252061+.fasta	FBgn0035198	3L	A	+	NA	NA	NA	1154	10.1737	218	236	+	227	-24	11.4497	3.86e-05	0.458	TCCAGTAGCCCTCGCAAAT	Y	A	SAME
FBgn0035216-3L-1410837-1411137+.fasta	FBgn0035216	3L	A	+	0.97647	acg_avg	0	2	1.58496	143	161	-	152	-99	9.83829	8.77e-05	0.574	TTGAGTTTGCTATGCTTTA	N	A	DIFF
FBgn0035218-3L-1423420-1423720-.fasta	FBgn0035218	3L	A	-	0.983482	tes_avg	9.04648	162	7.34873	55	73	-	64	-14	10.2987	7e-05	0.547	TACAGTAGTCTGCGACTAT	Y	A	SAME
FBgn0035267-3L-1746656-1746956+.fasta	FBgn0035267	3L	A	+	0.741313	abr_avg	2.44426	0	0	73	91	+	82	-169	10.7591	5.54e-05	0.524	TATAGCTTGCACTGAATAT	N	A	SAME
FBgn0035280-3L-1835113-1835413-.fasta	FBgn0035280	3L	A	-	0.783225	aeye_avg	0	0	0	32	50	-	41	10	9.83829	8.77e-05	0.574	CACAGTATTCCGGGCAACT	N	A	SAME
FBgn0035318-3L-2237025-2237325-.fasta	FBgn0035318	3L	A	-	0.145427	lcns_avg	6.44873	53	5.75489	116	134	+	125	-75	9.60809	9.8e-05	0.582	ATCAGTTTTCTTCGAATTT	Y	A	DIFF
FBgn0035384-3L-2994921-2995221+.fasta	FBgn0035384	3L	A	+	0.940831	tes_avg	10.0086	180	7.49985	250	268	+	259	9	9.60809	9.8e-05	0.582	CACAGTAGGCCTTGACTGC	N	A	SAME
FBgn0035434-3L-3316530-3316830+.fasta	FBgn0035434	3L	A	+	0.812523	aeye_avg	4.87497	28	4.85798	120	138	+	129	-122	9.83829	8.77e-05	0.574	TAAAGTATGCCCTTCCATG	N	A	SAME
FBgn0035434-3L-3316530-3316830+.fasta	FBgn0035434	3L	A	+	0.812523	aeye_avg	4.87497	28	4.85798	194	212	+	203	-48	10.1836	7.41e-05	0.557	CGAAGCTGGCAGAGAGATC	Y	A	SAME
FBgn0035476-3L-3940074-3940374-.fasta	FBgn0035476	3L	A	-	0.73214	amg_avg	3.73528	2	1.58496	133	151	+	142	-92	11.4497	3.86e-05	0.458	CCAAGCTGGCAGAGAAACT	N	A	DIFF
FBgn0035482-3L-4003223-4003523+.fasta	FBgn0035482	3L	A	+	1	lmg_avg	0	2	1.58496	15	33	+	24	-227	9.83829	8.77e-05	0.574	GCAAGATAGCTTTAAGTTT	N	A	SAME
FBgn0035491-3L-4047622-4047922-.fasta	FBgn0035491	3L	A	-	0.86206	tes_avg	11.3724	780	9.60918	94	112	-	103	-53	12.4856	2.17e-05	0.38	CTTAGCATGCCAAGACTTT	Y	A	SAME
FBgn0035538-3L-4380336-4380636-.fasta	FBgn0035538	3L	A	-	0.778797	abr_avg	0.541687	1	1	273	291	-	282	-232	9.95339	8.3e-05	0.562	AAAAATATGCAGTGCTATT	N	A	SAME
FBgn0035608-3L-5492007-5492307-.fasta	FBgn0035608	3L	A	-	0.777097	tes_avg	10.004	66	6.06609	132	150	+	141	-91	14.3272	7e-06	0.255	TGAAGTAAGCAGTGCTTCT	N	A	DIFF
FBgn0035667-3L-6047492-6047792-.fasta	FBgn0035667	3L	A	-	0.943042	lmg_avg	0	35	5.16993	243	261	+	252	-202	9.95339	8.3e-05	0.562	CAAAGGAGGCTTGTCAAAT	N	A	DIFF
FBgn0035695-3L-6233117-6233417-.fasta	FBgn0035695	3L	A	-	0.676751	atg_avg	4.65574	3	2	282	300	+	291	-241	10.1836	7.41e-05	0.557	TCAAGTTTGCATGCCATTG	N	A	DIFF
FBgn0035707-3L-6596533-6596833+.fasta	FBgn0035707	3L	A	+	0.365315	tes_avg	10.3477	304	8.25267	203	221	+	212	-39	12.4856	2.17e-05	0.38	CTAAGCAGGCCCAGCATTA	Y	A	SAME
FBgn0035711-3L-6697709-6698009+.fasta	FBgn0035711	3L	A	+	0.586009	acr_avg	5.95878	4	2.32193	262	280	+	271	21	10.9893	4.92e-05	0.503	ATCAGTTGGCCGCGCAAAT	N	A	SAME
FBgn0035730-3L-7019843-7020143-.fasta	FBgn0035730	3L	A	-	0.967547	tes_avg	9.9647	116	6.87036	106	124	-	115	-65	16.1688	1.92e-06	0.161	TTCAGGAGGCCAGGCGTTT	Y	A	SAME
FBgn0035735-3L-7079657-7079957-.fasta	FBgn0035735	3L	A	-	NA	NA	NA	0	0	101	119	-	110	-60	12.3705	2.32e-05	0.396	GCATGTTGGCTTTGTCTTT	Y	A	SAME
FBgn0035743-3L-7121752-7122052+.fasta	FBgn0035743	3L	A	+	0.856246	lmg_avg	2.10985	3	2	270	288	-	279	29	10.1836	7.41e-05	0.557	GCTAGTTGGCTTCGACAAA	N	A	DIFF
FBgn0035763-3L-7321891-7322191-.fasta	FBgn0035763	3L	A	-	0.158898	aht_avg	7.62491	29	4.90689	184	202	+	193	-143	14.9027	4.77e-06	0.219	TTTAGTAAGCCATGATTAT	N	A	DIFF
FBgn0035787-3L-7463351-7463651-.fasta	FBgn0035787	3L	A	-	0.974422	ahg_avg	0	1	1	124	142	-	133	-83	15.3631	3.46e-06	0.199	GCGAGTTGGCCGTGAAATT	N	A	SAME
FBgn0035799-3L-7576303-7576603+.fasta	FBgn0035799	3L	A	+	0.990657	tes_avg	6.81192	28	4.85798	158	176	+	167	-84	10.1836	7.41e-05	0.557	AAAAGTAGGCAATAAAATC	N	A	SAME
FBgn0035823-3L-7887729-7888029+.fasta	FBgn0035823	3L	A	+	0.917108	tes_avg	10.9443	237	7.89482	212	230	+	221	-30	12.1403	2.64e-05	0.414	CCCAGGTGTCATTGTCATT	Y	A	SAME
FBgn0035839-3L-8117580-8117880-.fasta	FBgn0035839	3L	A	-	0.273115	ltu_avg	6.71131	5	2.58496	88	106	-	97	-47	14.3272	7e-06	0.255	CCAAGTAGTCCGTGATACG	Y	A	SAME
FBgn0035844-3L-8144862-8145162-.fasta	FBgn0035844	3L	A	-	0.776619	ltr_avg	3.42986	1	1	97	115	+	106	-56	13.6366	1.09e-05	0.296	TTCGGCTGGCTTTGCGTTT	Y	A	DIFF
FBgn0035857-3L-8204739-8205039+.fasta	FBgn0035857	3L	A	+	0.96826	tes_avg	9.00377	44	5.49185	20	38	+	29	-222	13.0611	1.55e-05	0.344	AAAAGTAAGCTCTGATATT	N	A	SAME
FBgn0035858-3L-8212032-8212332-.fasta	FBgn0035858	3L	A	-	NA	NA	NA	0	0	175	193	+	184	-134	13.2913	1.35e-05	0.321	TTTAGTGGGCCATGCCAAT	N	A	DIFF
FBgn0035887-3L-8386698-8386998-.fasta	FBgn0035887	3L	A	-	0.917234	lmg_avg	0	0	0	20	38	-	29	22	11.9101	3e-05	0.431	CATAGCTATCCTGGCTTTG	N	A	SAME
FBgn0035888-3L-8388849-8389149+.fasta	FBgn0035888	3L	A	+	0.617491	ejd_avg	6.27562	14	3.90689	113	131	-	122	-129	9.72319	9.27e-05	0.577	ACCAGCAGGCCATACACTG	N	A	DIFF
FBgn0035943-3L-8959423-8959723-.fasta	FBgn0035943	3L	A	-	0.919287	tes_avg	8.16347	30	4.9542	16	34	+	25	26	9.83829	8.77e-05	0.574	TAGAGGAGGCACGGCATTT	N	A	DIFF
FBgn0035952-3L-8983277-8983577-.fasta	FBgn0035952	3L	A	-	0.96896	tes_avg	9.3364	127	7	94	112	-	103	-53	13.9819	8.76e-06	0.272	CCCAGGTTGCCATGCGTCT	Y	A	SAME
FBgn0035959-3L-9065780-9066080-.fasta	FBgn0035959	3L	A	-	0.567064	ova_avg	3.76441	18	4.24793	183	201	+	192	-142	9.72319	9.27e-05	0.577	TTAAGTAAGCCGAGATAAT	N	A	DIFF
FBgn0035960-3L-9065954-9066254+.fasta	FBgn0035960	3L	A	+	0.174718	ova_avg	5.34741	2	1.58496	9	27	+	18	-233	9.72319	9.27e-05	0.577	TTAAGTAAGCCGAGATAAT	N	A	SAME
FBgn0035970-3L-9229697-9229997-.fasta	FBgn0035970	3L	A	-	0.975101	tes_avg	6.95722	7	3	73	91	-	82	-32	14.9027	4.77e-06	0.219	CGCAGCAAGCCCGGATTTT	Y	A	SAME
FBgn0035988-3L-9410437-9410737-.fasta	FBgn0035988	3L	A	-	0.95283	tes_avg	11.3487	386	8.59619	81	99	-	90	-40	10.2987	7e-05	0.547	CCTAGTTGGCCAAGCTCTC	Y	A	SAME
FBgn0036004-3L-9469887-9470187+.fasta	FBgn0036004	3L	A	+	0.186902	ova_avg	4.99477	1	1	185	203	-	194	-57	12.7158	1.9e-05	0.362	AGCAGTAGGCCACTCATTT	Y	A	DIFF
FBgn0036014-3L-9591837-9592137+.fasta	FBgn0036014	3L	A	+	0.968867	tes_avg	10.3107	240	7.91289	1	19	-	10	-241	18.1255	3.85e-07	0.0787	TGAAGTTGGCTGTGCTATT	N	A	DIFF
FBgn0036014-3L-9591837-9592137+.fasta	FBgn0036014	3L	A	+	0.968867	tes_avg	10.3107	240	7.91289	202	220	+	211	-40	9.72319	9.27e-05	0.577	CTCAACAAGCCAGGCCATT	Y	A	SAME
FBgn0036031-3L-9696644-9696944-.fasta	FBgn0036031	3L	A	-	0.986124	tes_avg	9.36765	198	7.63662	181	199	+	190	-140	17.3198	7.72e-07	0.0964	TCAAGCTGTCCAGGAATTT	N	A	DIFF
FBgn0036063-3L-9965103-9965403-.fasta	FBgn0036063	3L	A	-	0.244913	tes_avg	7.14511	52	5.72792	281	299	+	290	-240	10.8742	5.22e-05	0.511	CTAAGATATCTTGGAATTT	N	A	DIFF
FBgn0036090-3L-10630995-10631295+.fasta	FBgn0036090	3L	A	+	0.0880253	ova_avg	7.55557	20	4.39232	44	62	+	53	-198	9.72319	9.27e-05	0.577	TCCGGTAAGCCATTAATTA	N	A	SAME
FBgn0036125-3L-11087510-11087810-.fasta	FBgn0036125	3L	A	-	0.88819	tes_avg	10.5797	213	7.74147	259	277	-	268	-218	9.72319	9.27e-05	0.577	ACCAGAAGGCCATTCCACT	N	A	SAME
FBgn0036139-3L-11143834-11144134-.fasta	FBgn0036139	3L	A	-	1	tes_avg	0.466298	0	0	91	109	-	100	-50	10.5289	6.23e-05	0.537	GTCAGCTGGCATAGAAATG	Y	A	SAME
FBgn0036153-3L-11304596-11304896+.fasta	FBgn0036153	3L	A	+	0.984118	tes_avg	6.92014	7	3	211	229	+	220	-31	12.946	1.66e-05	0.35	CTCAGTTGTCCTTTAGATT	Y	A	SAME
FBgn0036156-3L-11387539-11387839+.fasta	FBgn0036156	3L	A	+	0.888692	tes_avg	8.9162	28	4.85798	223	241	+	232	-19	16.8594	1.12e-06	0.118	CGAAATTGGCATTGCTTTT	Y	A	SAME
FBgn0036156-3L-11387539-11387839+.fasta	FBgn0036156	3L	A	+	0.888692	tes_avg	8.9162	28	4.85798	258	276	+	267	17	9.83829	8.77e-05	0.574	CCCAGTTTTCAAGGAAAAT	N	A	SAME
FBgn0036162-3L-11458913-11459213-.fasta	FBgn0036162	3L	A	-	0.927678	tes_avg	9.87861	264	8.04985	24	42	+	33	18	11.3346	4.1e-05	0.469	ACAAGCTGGCCTAGACAAG	N	A	DIFF
FBgn0036196-3L-11701602-11701902-.fasta	FBgn0036196	3L	A	-	0.182496	acg_avg	7.37402	23	4.58496	36	54	-	45	6	10.4138	6.6e-05	0.543	CTTAGTTTTCCTCGATTTG	N	A	SAME
FBgn0036206-3L-11786332-11786632-.fasta	FBgn0036206	3L	A	-	0.989396	tes_avg	5.74757	26	4.75489	10	28	+	19	32	12.1403	2.64e-05	0.414	TAAAGTAGTCTTTAATATT	N	A	DIFF
FBgn0036206-3L-11786332-11786632-.fasta	FBgn0036206	3L	A	-	0.989396	tes_avg	5.74757	26	4.75489	60	78	-	69	-19	9.72319	9.27e-05	0.577	CTATGTAGTCATTGAAATC	Y	A	SAME
FBgn0036207-3L-11786363-11786663+.fasta	FBgn0036207	3L	A	+	0.446241	acg_avg	6.16808	7	3	29	47	-	38	-213	9.72319	9.27e-05	0.577	CTATGTAGTCATTGAAATC	N	A	DIFF
FBgn0036222-3L-11917806-11918106-.fasta	FBgn0036222	3L	A	-	0.938123	tes_avg	8.84417	171	7.42626	241	259	-	250	-200	10.9893	4.92e-05	0.503	CCAAATAGGCGCTGCTATG	N	A	SAME
FBgn0036232-3L-11967754-11968054+.fasta	FBgn0036232	3L	A	+	0.971983	amg_avg	0	1	1	205	223	-	214	-37	16.1688	1.92e-06	0.161	TGCAGTGGGCGGTGCATTT	Y	A	DIFF
FBgn0036262-3L-12177833-12178133+.fasta	FBgn0036262	3L	A	+	0.552925	fsv_avg	4.1195	20	4.39232	213	231	+	222	-29	10.5289	6.23e-05	0.537	CCCAGATTGCGGGGACTTG	Y	A	SAME
FBgn0036285-3L-12425717-12426017-.fasta	FBgn0036285	3L	A	-	0.740977	acg_avg	2.87185	6	2.80735	38	56	-	47	4	9.60809	9.8e-05	0.582	GTCGGCGGGCGTTGAGTTT	N	A	SAME
FBgn0036338-3L-13019486-13019786-.fasta	FBgn0036338	3L	A	-	0.955215	tes_avg	8.97348	165	7.37504	109	127	+	118	-68	10.1836	7.41e-05	0.557	CACAGGTTGCTAGGATTCT	Y	A	DIFF
FBgn0036338-3L-13019486-13019786-.fasta	FBgn0036338	3L	A	-	0.955215	tes_avg	8.97348	165	7.37504	200	218	-	209	-159	9.95339	8.3e-05	0.562	TTCAGTTTGCTCTGATAAT	N	A	SAME
FBgn0036345-3L-13080338-13080638-.fasta	FBgn0036345	3L	A	-	0.974368	tes_avg	9.74975	121	6.93074	206	224	+	215	-165	11.5648	3.62e-05	0.448	AGAAACTGGCCTAGATTTT	N	A	DIFF
FBgn0036353-3L-13380956-13381256-.fasta	FBgn0036353	3L	A	-	0.223131	tes_avg	9.55944	33	5.08746	33	51	-	42	9	11.1044	4.63e-05	0.49	GCCAGGTTGCCATACATTT	N	A	SAME
FBgn0036372-3L-13479329-13479629-.fasta	FBgn0036372	3L	A	-	0.244002	ltu_avg	6.26869	14	3.90689	178	196	+	187	-137	15.1329	4.07e-06	0.215	TCTAATAGGCTTTGATTTA	N	A	DIFF
FBgn0036410-3L-14076464-14076764+.fasta	FBgn0036410	3L	A	+	0.929368	lfb_avg	0	0	0	168	186	-	177	-74	11.4497	3.86e-05	0.458	CTAAGGGAGCATTGATTTC	Y	A	DIFF
FBgn0036415-3L-14211054-14211354+.fasta	FBgn0036415	3L	A	+	0.630977	asg_avg	11.2538	511	9	148	166	+	157	-94	13.5215	1.17e-05	0.305	CAAAGCAGGCATTTTTTTT	N	A	SAME
FBgn0036415-3L-14211054-14211354+.fasta	FBgn0036415	3L	A	+	0.630977	asg_avg	11.2538	511	9	182	200	+	191	-60	14.5574	6.02e-06	0.237	TAAAGAAGGCTGTGAAATG	Y	A	SAME
FBgn0036419-3L-14322195-14322495+.fasta	FBgn0036419	3L	A	+	0.745839	amg_avg	0	9	3.32193	71	89	-	80	-171	10.8742	5.22e-05	0.511	TAAAGATAGCAATGTTTTT	N	A	DIFF
FBgn0036437-3L-14677617-14677917+.fasta	FBgn0036437	3L	A	+	0.881611	tes_avg	10.8845	1899	10.8918	76	94	-	85	-166	10.2987	7e-05	0.547	TGTAGTAGCCTTCGAGATT	N	A	DIFF
FBgn0036441-3L-14698313-14698613+.fasta	FBgn0036441	3L	A	+	0.933129	tes_avg	10.738	285	8.15987	185	203	+	194	-57	10.7591	5.54e-05	0.524	CCAAGCAGGCTACTCATTC	Y	A	SAME
FBgn0036442-3L-14721609-14721909+.fasta	FBgn0036442	3L	A	+	0.975222	tes_avg	9.24516	87	6.45943	207	225	-	216	-35	12.6007	2.03e-05	0.374	GCTAGTTGCCCTTTATTTT	Y	A	DIFF
FBgn0036465-3L-15035619-15035919-.fasta	FBgn0036465	3L	A	-	0.978599	tes_avg	9.08972	121	6.93074	103	121	-	112	-62	12.2554	2.47e-05	0.409	TATAGCAGCCCTGGAATAT	Y	A	SAME
FBgn0036465-3L-15035619-15035919-.fasta	FBgn0036465	3L	A	-	0.978599	tes_avg	9.08972	121	6.93074	231	249	-	240	-190	10.7591	5.54e-05	0.524	AATAGAAAGCAATGATTTA	N	A	SAME
FBgn0036492-3L-15295834-15296134-.fasta	FBgn0036492	3L	A	-	0.989896	tes_avg	7.06565	15	4	69	87	-	78	-28	12.4856	2.17e-05	0.38	TCCAATTGTCATTGCCATT	Y	A	SAME
FBgn0036492-3L-15295834-15296134-.fasta	FBgn0036492	3L	A	-	0.989896	tes_avg	7.06565	15	4	116	134	-	125	-75	18.5859	2.52e-07	0.0743	CAAAGTTGGCTTTGCTTAT	Y	A	SAME
FBgn0036498-3L-15489423-15489723+.fasta	FBgn0036498	3L	A	+	0.939936	tes_avg	8.68475	111	6.80735	262	280	+	271	21	12.2554	2.47e-05	0.409	ACAAGTAGGCAGTCATTTA	N	A	SAME
FBgn0036499-3L-15491051-15491351+.fasta	FBgn0036499	3L	A	+	0.928042	tes_avg	8.82528	63	6	190	208	+	199	-52	11.795	3.2e-05	0.442	ACTAGATGGCCATGAAAAA	Y	A	SAME
FBgn0036509-3L-15556114-15556414-.fasta	FBgn0036509	3L	A	-	NA	NA	NA	11	3.58496	109	127	+	118	-68	11.6799	3.4e-05	0.446	TCAAGCAGTCCGTTTATTT	Y	A	DIFF
FBgn0036512-3L-15569419-15569719+.fasta	FBgn0036512	3L	A	+	0.268965	tes_avg	9.75732	88	6.47573	149	167	-	158	-93	11.2195	4.36e-05	0.483	AAATGTATGCATTGACATT	N	A	DIFF
FBgn0036520-3L-15604766-15605066-.fasta	FBgn0036520	3L	A	-	0.8402	tes_avg	9.46284	76	6.26679	94	112	-	103	-53	19.2765	1.29e-07	0.0592	CAAAGTTGGCTTTGAGTTG	Y	A	SAME
FBgn0036534-3L-15819472-15819772-.fasta	FBgn0036534	3L	A	-	0.171762	acr_avg	5.86114	24	4.64386	125	143	+	134	-84	9.95339	8.3e-05	0.562	TACAGTTGGCTCTGTGATA	N	A	DIFF
FBgn0036597-3L-16288596-16288896-.fasta	FBgn0036597	3L	A	-	NA	NA	NA	0	0	53	71	+	62	-12	10.2987	7e-05	0.547	TCAAGTAGCCCTGTTATTT	Y	A	DIFF
FBgn0036608-3L-16319806-16320106-.fasta	FBgn0036608	3L	A	-	1	tes_avg	5.99571	3	2	38	56	-	47	4	9.60809	9.8e-05	0.582	TCGGGCAGGCCTTGCTTAA	N	A	SAME
FBgn0036609-3L-16319811-16320111-.fasta	FBgn0036609	3L	A	-	0.974038	tes_avg	8.55056	438	8.77808	33	51	-	42	9	9.60809	9.8e-05	0.582	TCGGGCAGGCCTTGCTTAA	N	A	SAME
FBgn0036626-3L-16384854-16385154-.fasta	FBgn0036626	3L	A	-	NA	NA	NA	0	0	90	108	-	99	-49	11.4497	3.86e-05	0.458	CATAGTTAGCATTGTTTTC	Y	A	SAME
FBgn0036639-3L-16549672-16549972+.fasta	FBgn0036639	3L	A	+	NA	NA	NA	0	0	80	98	-	89	-162	10.7591	5.54e-05	0.524	TCAAGTGGTCCAGGTTTTG	N	A	DIFF
FBgn0036652-3L-16666813-16667113+.fasta	FBgn0036652	3L	A	+	0.957766	tes_avg	10.1266	227	7.83289	237	255	+	246	-5	12.2554	2.47e-05	0.409	TAAAAATTGCCTTGCCTTT	Y	A	SAME
FBgn0036654-3L-16697822-16698122+.fasta	FBgn0036654	3L	A	+	0.974589	tes_avg	8.96968	45	5.52356	170	188	-	179	-72	11.5648	3.62e-05	0.448	TGTAGCAGGCTATTAAATA	Y	A	DIFF
FBgn0036655-3L-16717740-16718040+.fasta	FBgn0036655	3L	A	+	0.60249	ejd_avg	2.86663	0	0	136	154	-	145	-106	15.7084	2.7e-06	0.186	CACAGCTGGCCTGGCTAAT	N	A	DIFF
FBgn0036679-3L-16932001-16932301-.fasta	FBgn0036679	3L	A	-	0.925243	aeye_avg	3.46646	2	1.58496	67	85	-	76	-26	11.1044	4.63e-05	0.49	CTTAGCATGCTCGGAGTTT	Y	A	SAME
FBgn0036681-3L-16937272-16937572+.fasta	FBgn0036681	3L	A	+	0.876826	ltu_avg	0	0	0	130	148	+	139	-112	15.3631	3.46e-06	0.199	CCAAGTTGGCTTGGAAAAG	N	A	SAME
FBgn0036710-3L-17332311-17332611-.fasta	FBgn0036710	3L	A	-	0.281388	ova_avg	8.81788	48	5.61471	15	33	-	24	27	11.9101	3e-05	0.431	ACAAGTTTTCCCGGCATTT	N	A	SAME
FBgn0036712-3L-17337745-17338045-.fasta	FBgn0036712	3L	A	-	0.977029	tes_avg	5.95243	6	2.80735	81	99	-	90	-40	13.6366	1.09e-05	0.296	AGCAGCAAGCGTGGATTTT	Y	A	SAME
FBgn0036714-3L-17345268-17345568+.fasta	FBgn0036714	3L	A	+	0.401573	tes_avg	7.31179	23	4.58496	77	95	+	86	-165	9.72319	9.27e-05	0.577	TCAAGATGGCAAATAATTT	N	A	SAME
FBgn0036715-3L-17372579-17372879-.fasta	FBgn0036715	3L	A	-	0.696403	ltr_avg	0	1	1	178	196	-	187	-137	10.644	5.88e-05	0.534	GCCAGTTTTCATTGCCAAT	N	A	SAME
FBgn0036728-3L-17467610-17467910+.fasta	FBgn0036728	3L	A	+	0.173989	tes_avg	10.0137	118	6.89482	204	222	+	213	-38	12.8309	1.77e-05	0.357	ATAAGTAGCCCTCGATTTT	Y	A	SAME
FBgn0036760-3L-17836593-17836893-.fasta	FBgn0036760	3L	A	-	0.148013	acr_avg	7.38747	39	5.32193	126	144	-	135	-85	10.4138	6.6e-05	0.543	CCAAGGAGCCCTTAAATTC	N	A	SAME
FBgn0036768-3L-17880554-17880854+.fasta	FBgn0036768	3L	A	+	0.782077	ltr_avg	0	0	0	121	139	+	130	-121	10.9893	4.92e-05	0.503	AGCAGTAAGCTATAACTTT	N	A	SAME
FBgn0036777-3L-18105808-18106108+.fasta	FBgn0036777	3L	A	+	0.736578	ejd_avg	2.19082	0	0	260	278	+	269	19	9.60809	9.8e-05	0.582	TTCAGTTTGCATGGAACTA	N	A	SAME
FBgn0036877-3L-19496919-19497219-.fasta	FBgn0036877	3L	A	-	0.763215	lsg_avg	4.07336	3	2	242	260	-	251	-201	11.5648	3.62e-05	0.448	CCCAATTAGCTGGGATTTT	N	A	SAME
FBgn0036931-3L-20020884-20021184-.fasta	FBgn0036931	3L	A	-	0.826024	tes_avg	9.81614	101	6.67243	104	122	-	113	-63	13.9819	8.76e-06	0.272	CTAAGTAGCCCTTGAATAA	Y	A	SAME
FBgn0036934-3L-20082056-20082356-.fasta	FBgn0036934	3L	A	-	0.544942	abr_avg	1.48465	0	0	35	53	-	44	7	10.5289	6.23e-05	0.537	TTCAGTTGCCTGTGATTCT	N	A	SAME
FBgn0036951-3L-20205211-20205511-.fasta	FBgn0036951	3L	A	-	0.880565	lmg_avg	0	0	0	113	131	+	122	-72	12.8309	1.77e-05	0.357	CCAAGATAGCGCTGATTTT	Y	A	DIFF
FBgn0036975-3L-20346298-20346598+.fasta	FBgn0036975	3L	A	+	0.366237	lfb_avg	3.81839	5	2.58496	211	229	+	220	-31	10.5289	6.23e-05	0.537	TGAAATGGGCATTTCATTT	Y	A	SAME
FBgn0036992-3L-20432921-20433221-.fasta	FBgn0036992	3L	A	-	NA	NA	NA	0	0	175	193	-	184	-134	9.83829	8.77e-05	0.574	ACCAGCTAGCTAAGATATT	N	A	SAME
FBgn0036997-3L-20459793-20460093+.fasta	FBgn0036997	3L	A	+	0.785519	lcns_avg	0	0	0	264	282	-	273	23	9.95339	8.3e-05	0.562	GCCAGCGAGCTGCGATTTT	N	A	DIFF
FBgn0036999-3L-20467315-20467615+.fasta	FBgn0036999	3L	A	+	0.341073	asg_avg	4.26082	1	1	10	28	-	19	-232	14.4423	6.49e-06	0.246	CAAAGTAGGCCCTGTATAT	N	A	DIFF
FBgn0037001-3L-20484931-20485231+.fasta	FBgn0037001	3L	A	+	0.0957918	atg_avg	8.79781	199	7.64386	214	232	+	223	-28	10.644	5.88e-05	0.534	AGTAGTAGGCTATAAGTTA	Y	A	SAME
FBgn0037060-3L-21203064-21203364+.fasta	FBgn0037060	3L	A	+	0.545826	abr_avg	7.94463	18	4.24793	7	25	+	16	-235	9.95339	8.3e-05	0.562	TCAAGCGTGCCAAGATTTC	N	A	SAME
FBgn0037107-3L-21618696-21618996-.fasta	FBgn0037107	3L	A	-	0.801822	abr_avg	6.64264	1	1	162	180	-	171	-121	10.1836	7.41e-05	0.557	CGAAGTTTGCCTTGTGACA	N	A	SAME
FBgn0037108-3L-21618744-21619044+.fasta	FBgn0037108	3L	A	+	0.204417	asg_avg	6.56276	19	4.32193	114	132	-	123	-128	10.1836	7.41e-05	0.557	CGAAGTTTGCCTTGTGACA	N	A	DIFF
FBgn0037114-3L-21660029-21660329-.fasta	FBgn0037114	3L	A	-	0.755231	ltr_avg	0.938546	0	0	44	62	+	53	-3	17.8953	4.72e-07	0.0891	GGAAGCTGGCTTTGAATTG	Y	A	DIFF
FBgn0037120-3L-21721855-21722155-.fasta	FBgn0037120	3L	A	-	0.180292	abr_avg	7.50976	12	3.70044	109	127	-	118	-68	15.4782	3.19e-06	0.189	TTCAGCAGGCTGTGATTTC	Y	A	SAME
FBgn0037121-3L-21721781-21722081+.fasta	FBgn0037121	3L	A	+	0.143357	lcns_avg	7.61599	28	4.85798	183	201	-	192	-59	15.4782	3.19e-06	0.189	TTCAGCAGGCTGTGATTTC	Y	A	DIFF
FBgn0037125-3L-21726948-21727248+.fasta	FBgn0037125	3L	A	+	1	ltr_avg	0	0	0	20	38	-	29	-222	10.0685	7.84e-05	0.562	CCTAGTTGCCCATGCCCAT	N	A	DIFF
FBgn0037162-3L-22447222-22447522+.fasta	FBgn0037162	3L	A	+	NA	NA	NA	0	0	246	264	+	255	5	13.7517	1.01e-05	0.288	AAAAGGATGCCCTGCTTTT	N	A	SAME
FBgn0037191-3L-22781288-22781588+.fasta	FBgn0037191	3L	A	+	0.961777	tes_avg	10.1932	160	7.33092	242	260	+	251	1	14.3272	7e-06	0.255	CTAAGAAGGCCAAGACTTT	N	A	SAME
FBgn0037222-3R-68388-68688-.fasta	FBgn0037222	3R	A	-	0.797704	fsv_avg	8.04351	34	5.12928	179	197	-	188	-138	14.9027	4.77e-06	0.219	CCCAGCAAGCCTTGGAATT	N	A	SAME
FBgn0037238-3R-185354-185654+.fasta	FBgn0037238	3R	A	+	0.792278	abr_avg	0	0	0	279	297	-	288	38	10.2987	7e-05	0.547	TCGAGCTGGCCTGGTTTTC	N	A	DIFF
FBgn0037276-3R-610393-610693-.fasta	FBgn0037276	3R	A	-	0.965601	tes_avg	8.30044	165	7.37504	95	113	-	104	-54	9.95339	8.3e-05	0.562	CTTAGGGTGCCCTGAATTG	Y	A	SAME
FBgn0037282-3R-647103-647403-.fasta	FBgn0037282	3R	A	-	0.282309	acg_avg	5.66084	17	4.16993	79	97	+	88	-38	11.9101	3e-05	0.431	ATAAGCGGGCCTGTATTTT	Y	A	DIFF
FBgn0037282-3R-647103-647403-.fasta	FBgn0037282	3R	A	-	0.282309	acg_avg	5.66084	17	4.16993	253	271	+	262	-212	10.7591	5.54e-05	0.524	TGAAGCAGTCTGTTCCATT	N	A	DIFF
FBgn0037296-3R-1045117-1045417-.fasta	FBgn0037296	3R	A	-	0.943379	tes_avg	8.96281	43	5.45943	119	137	-	128	-78	12.1403	2.64e-05	0.414	CCAGGTAGGCCTTGGGTAT	Y	A	SAME
FBgn0037297-3R-1045128-1045428+.fasta	FBgn0037297	3R	A	+	0.131378	lsg_avg	6.72554	36	5.20945	108	126	-	117	-134	12.1403	2.64e-05	0.414	CCAGGTAGGCCTTGGGTAT	N	A	DIFF
FBgn0037310-3R-1125616-1125916+.fasta	FBgn0037310	3R	A	+	0.960654	tes_avg	9.6297	140	7.13955	201	219	+	210	-41	18.9312	1.81e-07	0.0636	TCAAGGAGGCTTTGACTTG	Y	A	SAME
FBgn0037325-3R-1252928-1253228-.fasta	FBgn0037325	3R	A	-	0.954233	tes_avg	8.36966	88	6.47573	268	286	+	277	-227	10.7591	5.54e-05	0.524	TCCAGTTGGCTTTTATCAT	N	A	DIFF
FBgn0037336-3R-1373446-1373746-.fasta	FBgn0037336	3R	A	-	0.189207	lcns_avg	5.74882	4	2.32193	64	82	+	73	-23	10.2987	7e-05	0.547	GGCAAGTGGCCGTGACTAT	Y	A	DIFF
FBgn0037342-3R-1394286-1394586-.fasta	FBgn0037342	3R	A	-	0.174064	lcns_avg	7.66042	40	5.35755	79	97	-	88	-38	9.60809	9.8e-05	0.582	CTAAACAGGCCTTTAAAAT	Y	A	SAME
FBgn0037342-3R-1394286-1394586-.fasta	FBgn0037342	3R	A	-	0.174064	lcns_avg	7.66042	40	5.35755	243	261	+	252	-202	10.8742	5.22e-05	0.511	CCGAACGGGCCTTGATATT	N	A	DIFF
FBgn0037356-3R-1462705-1463005+.fasta	FBgn0037356	3R	A	+	0.11045	ahg_avg	6.71961	18	4.24793	222	240	+	231	-20	11.9101	3e-05	0.431	CGAAGTGTGCTTGGTATTT	Y	A	SAME
FBgn0037358-3R-1480532-1480832-.fasta	FBgn0037358	3R	A	-	0.199124	lhg_avg	7.86735	62	5.97728	273	291	-	282	-232	11.6799	3.4e-05	0.446	TACTGTAGGCTTTGCATAA	N	A	SAME
FBgn0037359-3R-1480610-1480910+.fasta	FBgn0037359	3R	A	+	0.302143	tes_avg	7.71443	85	6.42626	195	213	-	204	-47	11.6799	3.4e-05	0.446	TACTGTAGGCTTTGCATAA	Y	A	DIFF
FBgn0037363-3R-1495184-1495484+.fasta	FBgn0037363	3R	A	+	0.214569	aht_avg	3.93919	5	2.58496	125	143	+	134	-117	12.8309	1.77e-05	0.357	CACTGGAGGCCGGGCATTT	N	A	SAME
FBgn0037384-3R-1650076-1650376+.fasta	FBgn0037384	3R	A	+	0.267286	ova_avg	7.87789	27	4.80735	66	84	-	75	-176	9.95339	8.3e-05	0.562	ACAAGGATGCGTTTACATT	N	A	DIFF
FBgn0037418-3R-2094428-2094728-.fasta	FBgn0037418	3R	A	-	NA	NA	NA	1	1	57	75	-	66	-16	12.4856	2.17e-05	0.38	ATCAGTTGGCCAAGAGATT	Y	A	SAME
FBgn0037435-3R-2171582-2171882+.fasta	FBgn0037435	3R	A	+	0.403898	ova_avg	1.48142	4	2.32193	73	91	-	82	-169	14.9027	4.77e-06	0.219	GATAGTTAGCTTTGAAATT	N	A	DIFF
FBgn0037460-3R-2453571-2453871-.fasta	FBgn0037460	3R	A	-	0.959253	tes_avg	10.8247	284	8.15482	92	110	-	101	-51	11.1044	4.63e-05	0.49	CGCAGGAGCCTTTGAACTT	Y	A	SAME
FBgn0037530-3R-3733034-3733334-.fasta	FBgn0037530	3R	A	-	0.128398	ejd_avg	9.08179	54	5.78136	206	224	-	215	-165	10.644	5.88e-05	0.534	GCAAAATGGCAAGGCATTT	N	A	SAME
FBgn0037533-3R-3803440-3803740-.fasta	FBgn0037533	3R	A	-	0.108451	lcns_avg	7.44886	25	4.70044	129	147	-	138	-88	12.7158	1.9e-05	0.362	GTAAGTAGGCACTGAAAAT	N	A	SAME
FBgn0037535-3R-3825303-3825603+.fasta	FBgn0037535	3R	A	+	0.162078	ova_avg	5.78258	5	2.58496	137	155	-	146	-105	11.6799	3.4e-05	0.446	AGCAGCTATCTGTGCATTT	N	A	DIFF
FBgn0037543-3R-3855882-3856182+.fasta	FBgn0037543	3R	A	+	0.116863	ltr_avg	6.21227	8	3.16993	18	36	-	27	-224	9.95339	8.3e-05	0.562	CCAAAGATGCATTTAATTT	N	A	DIFF
FBgn0037594-3R-4378079-4378379+.fasta	FBgn0037594	3R	A	+	0.962927	acg_avg	0	0	0	114	132	+	123	-128	9.95339	8.3e-05	0.562	TCAAGTGGGCGTGCCAATT	N	A	SAME
FBgn0037608-3R-4499580-4499880+.fasta	FBgn0037608	3R	A	+	0.132519	ova_avg	6.75799	36	5.20945	193	211	+	202	-49	9.72319	9.27e-05	0.577	ACAAGTTGGCAGTACCCTT	Y	A	SAME
FBgn0037616-3R-4546842-4547142+.fasta	FBgn0037616	3R	A	+	0.801493	tes_avg	10.5392	555	9.11894	225	243	+	234	-17	10.5289	6.23e-05	0.537	ATTAGTAGGCCGTGGGTTC	Y	A	SAME
FBgn0037630-3R-4620155-4620455+.fasta	FBgn0037630	3R	A	+	1	tes_avg	4.31583	5	2.58496	236	254	+	245	-6	16.2839	1.76e-06	0.153	AACAGTTGGCATTGCAATG	Y	A	SAME
FBgn0037637-3R-4649848-4650148-.fasta	FBgn0037637	3R	A	-	0.168566	atg_avg	8.64351	123	6.9542	4	22	-	13	38	11.4497	3.86e-05	0.458	CGCAGTTGCCTGTGTTTTT	N	A	SAME
FBgn0037637-3R-4649848-4650148-.fasta	FBgn0037637	3R	A	-	0.168566	atg_avg	8.64351	123	6.9542	264	282	+	273	-223	11.4497	3.86e-05	0.458	GGCAGCTTGCCAGGTATTT	N	A	DIFF
FBgn0037638-3R-4649882-4650182+.fasta	FBgn0037638	3R	A	+	0.0980155	lsg_avg	8.07766	31	5	230	248	+	239	-12	11.4497	3.86e-05	0.458	GGCAGCTTGCCAGGTATTT	Y	A	SAME
FBgn0037656-3R-4840917-4841217+.fasta	FBgn0037656	3R	A	+	0.392065	ltu_avg	6.43243	21	4.45943	36	54	+	45	-206	12.1403	2.64e-05	0.414	TCCAGCTGGCTGTGGATAT	N	A	SAME
FBgn0037664-3R-5072120-5072420+.fasta	FBgn0037664	3R	A	+	0.844119	acg_avg	8.13221	85	6.42626	215	233	+	224	-27	10.644	5.88e-05	0.534	TATAGTGTGCATTGAGAAT	Y	A	SAME
FBgn0037671-3R-5086109-5086409+.fasta	FBgn0037671	3R	A	+	0.184561	asg_avg	9.19277	73	6.20945	50	68	-	59	-192	10.8742	5.22e-05	0.511	ACTTGTAAGCATTGCATTA	N	A	DIFF
FBgn0037696-3R-5282217-5282517-.fasta	FBgn0037696	3R	A	-	0.200516	lhg_avg	0.854446	4	2.32193	126	144	+	135	-85	10.4138	6.6e-05	0.543	AAGAGTAGGCAATTATTTT	N	A	DIFF
FBgn0037721-3R-5452601-5452901-.fasta	FBgn0037721	3R	A	-	0.691242	acg_avg	5.27629	10	3.45943	123	141	-	132	-82	13.0611	1.55e-05	0.344	TGAAATTGGCCATGCAAAT	N	A	SAME
FBgn0037778-3R-5871045-5871345+.fasta	FBgn0037778	3R	A	+	0.222069	ova_avg	3.90165	2	1.58496	166	184	-	175	-76	18.701	2.26e-07	0.0724	AACAGCTGGCCATGCTTTT	Y	A	DIFF
FBgn0037797-3R-6048169-6048469+.fasta	FBgn0037797	3R	A	+	0.952244	lcns_avg	0	0	0	54	72	+	63	-188	11.5648	3.62e-05	0.448	TTGAGTTAGCATTGACATT	N	A	SAME
FBgn0037850-3R-6704990-6705290-.fasta	FBgn0037850	3R	A	-	0.73539	lsg_avg	0	1	1	258	276	+	267	-217	10.644	5.88e-05	0.534	CTTAGGAGGCAGGGACAAT	N	A	DIFF
FBgn0037874-3R-7035718-7036018+.fasta	FBgn0037874	3R	A	+	0.0688264	asg_avg	9.86795	266	8.0607	178	196	+	187	-64	11.2195	4.36e-05	0.483	TATAGTAGGCGCTGCCACT	Y	A	SAME
FBgn0037910-3R-7379616-7379916+.fasta	FBgn0037910	3R	A	+	0.973019	tes_avg	9.06469	49	5.64386	150	168	+	159	-92	12.8309	1.77e-05	0.357	CTCAGTAGCCTCTGACTTT	N	A	SAME
FBgn0037915-3R-7404416-7404716-.fasta	FBgn0037915	3R	A	-	0.862438	tes_avg	9.88673	84	6.40939	114	132	+	123	-73	11.6799	3.4e-05	0.446	CATAGCAACCCTTGCATTC	Y	A	DIFF
FBgn0037916-3R-7404297-7404597+.fasta	FBgn0037916	3R	A	+	0.97401	tes_avg	6.54454	7	3	233	251	+	242	-9	11.6799	3.4e-05	0.446	CATAGCAACCCTTGCATTC	Y	A	SAME
FBgn0037917-3R-7407047-7407347+.fasta	FBgn0037917	3R	A	+	0.177257	ahg_avg	6.02241	7	3	7	25	+	16	-235	10.1836	7.41e-05	0.557	TGCGGTAGTCCATGTGTTT	N	A	SAME
FBgn0037918-3R-7415817-7416117-.fasta	FBgn0037918	3R	A	-	0.267058	lcns_avg	5.78509	6	2.80735	10	28	-	19	32	10.2987	7e-05	0.547	ACAAAATGGCTCTGATTTT	N	A	SAME
FBgn0037921-3R-7451315-7451615-.fasta	FBgn0037921	3R	A	-	0.459958	aeye_avg	5.19866	8	3.16993	91	109	-	100	-50	11.4497	3.86e-05	0.458	ACTAGTGGGCATTTCGATT	Y	A	SAME
FBgn0037974-3R-7808293-7808593-.fasta	FBgn0037974	3R	A	-	0.755323	amg_avg	0	0	0	67	85	-	76	-26	10.0685	7.84e-05	0.562	TTAAGCAGGCAGTACTTCT	Y	A	SAME
FBgn0038038-3R-8232003-8232303+.fasta	FBgn0038038	3R	A	+	0.185931	afb_avg	4.15064	8	3.16993	12	30	-	21	-230	11.1044	4.63e-05	0.49	ACAAGAAATCGATGAATTT	N	A	DIFF
FBgn0038051-3R-8264810-8265110-.fasta	FBgn0038051	3R	A	-	NA	NA	NA	48	5.61471	98	116	-	107	-57	13.5215	1.17e-05	0.305	TCAAGTTGTCAAAGCATTT	Y	A	SAME
FBgn0038053-3R-8274767-8275067+.fasta	FBgn0038053	3R	A	+	0.207386	lfb_avg	4.2005	3	2	277	295	+	286	36	9.95339	8.3e-05	0.562	TAAAGATTGCATTTACATT	N	A	SAME
FBgn0038098-3R-8803142-8803442-.fasta	FBgn0038098	3R	A	-	0.837013	amg_avg	0	0	0	279	297	+	288	-238	11.6799	3.4e-05	0.446	TTAAGTAAGCTTTTAATAT	N	A	DIFF
FBgn0038099-3R-8803471-8803771+.fasta	FBgn0038099	3R	A	+	0.823259	acg_avg	4.81633	3	2	191	209	+	200	-51	14.3272	7e-06	0.255	CCCAGTTGGCTTTACATAT	Y	A	SAME
FBgn0038109-3R-8835366-8835666+.fasta	FBgn0038109	3R	A	+	0.968395	tes_avg	9.37448	274	8.10329	224	242	+	233	-18	10.644	5.88e-05	0.534	AATAGTTGGCCAGTCGTTG	Y	A	SAME
FBgn0038153-3R-9245750-9246050+.fasta	FBgn0038153	3R	A	+	0.959192	afb_avg	0	0	0	229	247	+	238	-13	10.2987	7e-05	0.547	CCAAGTGGGCGTGGTAAAT	Y	A	SAME
FBgn0038163-3R-9457413-9457713+.fasta	FBgn0038163	3R	A	+	0.905817	tes_avg	9.95933	133	7.06609	211	229	+	220	-31	17.4349	7.01e-07	0.0939	CCAAGTAGCCCTTGATTTC	Y	A	SAME
FBgn0038189-3R-9771483-9771783-.fasta	FBgn0038189	3R	A	-	0.817858	tes_avg	6.30702	24	4.64386	106	124	-	115	-65	18.1255	3.85e-07	0.0787	ACCAGATGGCCATGATTTT	Y	A	SAME
FBgn0038195-3R-9857842-9858142+.fasta	FBgn0038195	3R	A	+	0.108869	aeye_avg	8.29886	112	6.82018	217	235	-	226	-25	10.7591	5.54e-05	0.524	ATATGCAGGCTGTGCTATT	Y	A	DIFF
FBgn0038248-3R-10468234-10468534-.fasta	FBgn0038248	3R	A	-	0.963405	tes_avg	10.7378	318	8.31741	2	20	-	11	40	10.5289	6.23e-05	0.537	GTTAGTTTGCCTTGACACA	N	A	SAME
FBgn0038248-3R-10468234-10468534-.fasta	FBgn0038248	3R	A	-	0.963405	tes_avg	10.7378	318	8.31741	153	171	+	162	-112	11.5648	3.62e-05	0.448	GCCAGGATGCTTTGGTTTT	N	A	DIFF
FBgn0038282-3R-10902876-10903176-.fasta	FBgn0038282	3R	A	-	0.876858	abr_avg	0	0	0	282	300	-	291	-241	10.0685	7.84e-05	0.562	AACAGATGGCCATTAAATG	N	A	SAME
FBgn0038334-3R-11208622-11208922-.fasta	FBgn0038334	3R	A	-	0.955718	tes_avg	8.02531	178	7.48382	78	96	-	87	-37	10.1836	7.41e-05	0.557	CTTAATAGGCTATTACTTT	Y	A	SAME
FBgn0038373-3R-11671979-11672279+.fasta	FBgn0038373	3R	A	+	0.955568	tes_avg	11.1322	1812	10.8242	146	164	+	155	-96	9.60809	9.8e-05	0.582	TCAAGCAGTCGCCGCAATT	N	A	SAME
FBgn0038380-3R-11715786-11716086-.fasta	FBgn0038380	3R	A	-	NA	NA	NA	0	0	17	35	-	26	25	11.1044	4.63e-05	0.49	GCTTGTTGGCCTGGTTTTT	N	A	SAME
FBgn0038416-3R-12153320-12153620+.fasta	FBgn0038416	3R	A	+	0.863817	lmg_avg	4.20851	1	1	96	114	-	105	-146	11.4497	3.86e-05	0.458	TGAAGTAAGCCTCGATAAG	N	A	DIFF
FBgn0038445-3R-12396986-12397286+.fasta	FBgn0038445	3R	A	+	0.947744	tes_avg	10.2332	47	5.58496	209	227	+	218	-33	12.8309	1.77e-05	0.357	CACAGTAATCGGTGAGTTT	Y	A	SAME
FBgn0038486-3R-12964470-12964770+.fasta	FBgn0038486	3R	A	+	0.932194	tes_avg	9.3599	76	6.26679	219	237	-	228	-23	10.644	5.88e-05	0.534	TCCAGTTTGCATTGATCAG	Y	A	DIFF
FBgn0038529-3R-13447783-13448083-.fasta	FBgn0038529	3R	A	-	NA	NA	NA	0	0	130	148	+	139	-89	10.1836	7.41e-05	0.557	CCTAATGGGCCTTGTAATG	N	A	DIFF
FBgn0038540-3R-13559069-13559369+.fasta	FBgn0038540	3R	A	+	0.886702	lcns_avg	0	0	0	247	265	+	256	6	13.0611	1.55e-05	0.344	AACAGCTGGCTTTGAAAAG	N	A	SAME
FBgn0038564-3R-13847071-13847371+.fasta	FBgn0038564	3R	A	+	0.288492	ova_avg	2.85787	0	0	2	20	-	11	-240	9.83829	8.77e-05	0.574	CCTAGTTTTCAATGCGCTT	N	A	DIFF
FBgn0038576-3R-14010969-14011269+.fasta	FBgn0038576	3R	A	+	0.281279	tes_avg	7.68872	45	5.52356	203	221	+	212	-39	12.4856	2.17e-05	0.38	TACAGTATGCTTGGCACTT	Y	A	SAME
FBgn0038586-3R-14051753-14052053-.fasta	FBgn0038586	3R	A	-	0.221893	acr_avg	4.96378	20	4.39232	191	209	+	200	-150	11.4497	3.86e-05	0.458	GAAAGTATGCTTTTCCTTA	N	A	DIFF
FBgn0038596-3R-14109204-14109504-.fasta	FBgn0038596	3R	A	-	0.856131	abr_avg	0.902353	6	2.80735	125	143	-	134	-84	12.1403	2.64e-05	0.414	AGCAGTTGGCAGCGCGATT	N	A	SAME
FBgn0038597-3R-14109133-14109433+.fasta	FBgn0038597	3R	A	+	0.248504	lcns_avg	4.28392	8	3.16993	196	214	-	205	-46	12.1403	2.64e-05	0.414	AGCAGTTGGCAGCGCGATT	Y	A	DIFF
FBgn0038630-3R-14424227-14424527+.fasta	FBgn0038630	3R	A	+	0.968516	tes_avg	10.5302	309	8.27612	202	220	+	211	-40	13.4064	1.25e-05	0.313	GGTAGAAGGCTGTGCATTA	Y	A	SAME
FBgn0038646-3R-14554139-14554439-.fasta	FBgn0038646	3R	A	-	0.995473	lmg_avg	0	0	0	190	208	-	199	-149	11.3346	4.1e-05	0.469	TTCAATTAGCTGTGAATTT	N	A	SAME
FBgn0038655-3R-14723592-14723892+.fasta	FBgn0038655	3R	A	+	NA	NA	NA	1463	10.5157	258	276	+	267	17	15.1329	4.07e-06	0.215	CCCAGTAAGCCGTGTCATT	N	A	SAME
FBgn0038676-3R-14859005-14859305+.fasta	FBgn0038676	3R	A	+	1	afb_avg	0	0	0	201	219	+	210	-41	11.1044	4.63e-05	0.49	ACCTGTTGGCAGTGCTTTC	Y	A	SAME
FBgn0038693-3R-15071801-15072101-.fasta	FBgn0038693	3R	A	-	0.851624	abr_avg	3.80274	1	1	200	218	+	209	-159	9.60809	9.8e-05	0.582	TTAAATAGGCTATGTGATT	N	A	DIFF
FBgn0038702-3R-15218831-15219131+.fasta	FBgn0038702	3R	A	+	1	amg_avg	0	11	3.58496	132	150	+	141	-110	10.1836	7.41e-05	0.557	TTTTGTTTGCTTTGCAATT	N	A	SAME
FBgn0038734-3R-15608993-15609293+.fasta	FBgn0038734	3R	A	+	0.850854	lmg_avg	0	0	0	37	55	+	46	-205	11.3346	4.1e-05	0.469	ATAAGTGGGCCATGAGAAG	N	A	SAME
FBgn0038738-3R-15690064-15690364-.fasta	FBgn0038738	3R	A	-	NA	NA	NA	93	6.55459	212	230	-	221	-171	10.0685	7.84e-05	0.562	TCAAGCTTTCATTTATTTG	N	A	SAME
FBgn0038760-3R-15834418-15834718+.fasta	FBgn0038760	3R	A	+	0.177144	lcns_avg	4.29141	2	1.58496	135	153	-	144	-107	10.5289	6.23e-05	0.537	TGCAGATTGCCTTGAAAAC	N	A	DIFF
FBgn0038771-3R-15885436-15885736-.fasta	FBgn0038771	3R	A	-	NA	NA	NA	175	7.45943	41	59	-	50	1	9.60809	9.8e-05	0.582	CAAAGTTGGCCTTTGATCG	N	A	SAME
FBgn0038788-3R-16153941-16154241+.fasta	FBgn0038788	3R	A	+	0.222159	tes_avg	9.10422	192	7.59246	172	190	+	181	-70	9.60809	9.8e-05	0.582	ATCAATAAGCAATGAAATT	Y	A	SAME
FBgn0038797-3R-16327597-16327897-.fasta	FBgn0038797	3R	A	-	0.957192	tes_avg	10.6829	202	7.66534	199	217	+	208	-158	10.9893	4.92e-05	0.503	AGCAGTTGTCATGGAAATC	N	A	DIFF
FBgn0038803-3R-16386336-16386636+.fasta	FBgn0038803	3R	A	+	0.28684	acr_avg	7.39178	5	2.58496	269	287	-	278	28	10.644	5.88e-05	0.534	CGCAGTGGGCTATCAATTA	N	A	DIFF
FBgn0038816-3R-16460951-16461251+.fasta	FBgn0038816	3R	A	+	0.345783	abr_avg	4.12956	1	1	89	107	+	98	-153	10.1836	7.41e-05	0.557	TTAAGCTGGCTTTAATCTT	N	A	SAME
FBgn0038847-3R-16869563-16869863+.fasta	FBgn0038847	3R	A	+	1	abr_avg	0	0	0	257	275	+	266	16	9.72319	9.27e-05	0.577	GGCAGTTGGCATTGGGACT	N	A	SAME
FBgn0038901-3R-17594989-17595289+.fasta	FBgn0038901	3R	A	+	0.827982	lcns_avg	0	1	1	16	34	+	25	-226	9.72319	9.27e-05	0.577	GCATGTTGGCCTGGCCCTG	N	A	SAME
FBgn0038909-3R-17693590-17693890-.fasta	FBgn0038909	3R	A	-	0.970592	tes_avg	9.99128	293	8.19967	109	127	+	118	-68	14.6725	5.57e-06	0.229	TGAAGCAAGCTTTGTCTTT	Y	A	DIFF
FBgn0038912-3R-17700764-17701064+.fasta	FBgn0038912	3R	A	+	0.463946	aeye_avg	4.55287	5	2.58496	115	133	-	124	-127	10.2987	7e-05	0.547	ACAAGTTTTCCATGTGATT	N	A	DIFF
FBgn0038919-3R-17739218-17739518+.fasta	FBgn0038919	3R	A	+	NA	NA	NA	9	3.32193	230	248	+	239	-12	11.795	3.2e-05	0.442	CCAAAGAGCCCTTGCTATT	Y	A	SAME
FBgn0038941-3R-18154772-18155072+.fasta	FBgn0038941	3R	A	+	NA	NA	NA	0	0	124	142	-	133	-118	11.795	3.2e-05	0.442	GCCAGCTGGCTCTGATTCG	N	A	DIFF
FBgn0038972-3R-18290456-18290756+.fasta	FBgn0038972	3R	A	+	0.227785	acg_avg	4.93838	14	3.90689	141	159	+	150	-101	11.795	3.2e-05	0.442	GGAAGTGATCTTTGCGTTT	N	A	SAME
FBgn0038976-3R-18312510-18312810+.fasta	FBgn0038976	3R	A	+	0.113317	ltr_avg	9.3575	227	7.83289	258	276	+	267	17	11.5648	3.62e-05	0.448	TTCAGAAGTCACTGATTTT	N	A	SAME
FBgn0038978-3R-18317300-18317600+.fasta	FBgn0038978	3R	A	+	0.934019	tes_avg	11.3187	817	9.67596	181	199	+	190	-61	20.3124	4.23e-08	0.026	TTCAGTAGGCATTGACTTT	Y	A	SAME
FBgn0039013-3R-18552053-18552353-.fasta	FBgn0039013	3R	A	-	0.292568	ova_avg	4.87534	14	3.90689	108	126	+	117	-67	11.2195	4.36e-05	0.483	GGAAGTGGTCATTGCGATA	Y	A	DIFF
FBgn0039042-3R-18869461-18869761+.fasta	FBgn0039042	3R	A	+	0.841995	lhg_avg	0	0	0	21	39	+	30	-221	10.9893	4.92e-05	0.503	CGAAGTATGCTACGAAAAT	N	A	SAME
FBgn0039059-3R-18987009-18987309-.fasta	FBgn0039059	3R	A	-	0.943441	tes_avg	8.54137	26	4.75489	64	82	-	73	-23	18.701	2.26e-07	0.0724	TTAAGTAGGCATTGAGTTG	Y	A	SAME
FBgn0039065-3R-19077148-19077448-.fasta	FBgn0039065	3R	A	-	0.340627	tes_avg	9.03629	44	5.49185	66	84	-	75	-25	9.60809	9.8e-05	0.582	CACAGTAGGCTTGTACAAA	Y	A	SAME
FBgn0039066-3R-19077034-19077334+.fasta	FBgn0039066	3R	A	+	0.234573	ova_avg	6.55741	33	5.08746	180	198	-	189	-62	9.60809	9.8e-05	0.582	CACAGTAGGCTTGTACAAA	Y	A	DIFF
FBgn0039102-3R-19511726-19512026+.fasta	FBgn0039102	3R	A	+	0.627314	aeye_avg	4.41812	2	1.58496	233	251	-	242	-9	10.7591	5.54e-05	0.524	CCAAGCTGTCCGGCAGTTT	Y	A	DIFF
FBgn0039111-3R-19583810-19584110+.fasta	FBgn0039111	3R	A	+	0.111959	ejd_avg	7.45177	13	3.80735	153	171	-	162	-89	11.795	3.2e-05	0.442	CGCAGTTGCCCGGGAAATA	N	A	DIFF
FBgn0039112-3R-19586271-19586571-.fasta	FBgn0039112	3R	A	-	0.0902041	ejd_avg	9.58169	114	6.84549	55	73	+	64	-14	9.72319	9.27e-05	0.577	GTCAGCTGTCATCGATTTG	Y	A	DIFF
FBgn0039131-3R-19774095-19774395-.fasta	FBgn0039131	3R	A	-	0.864849	ejd_avg	0	3	2	32	50	-	41	10	10.1836	7.41e-05	0.557	TTCAGTTGCCGCTGAGTTT	N	A	SAME
FBgn0039136-3R-19812113-19812413+.fasta	FBgn0039136	3R	A	+	0.199129	ltu_avg	6.45339	19	4.32193	45	63	-	54	-197	10.644	5.88e-05	0.534	GATAGCTGGCCATGTCATC	N	A	DIFF
FBgn0039169-3R-20052605-20052905-.fasta	FBgn0039169	3R	A	-	0.30387	ova_avg	5.43206	6	2.80735	59	77	+	68	-18	10.8742	5.22e-05	0.511	CCAGGGTTGCATTGCGTTG	Y	A	DIFF
FBgn0039170-3R-20052494-20052794+.fasta	FBgn0039170	3R	A	+	0.850446	acg_avg	3.83263	1	1	170	188	+	179	-72	10.8742	5.22e-05	0.511	CCAGGGTTGCATTGCGTTG	Y	A	SAME
FBgn0039190-3R-20187354-20187654-.fasta	FBgn0039190	3R	A	-	NA	NA	NA	1022	9.99859	92	110	-	101	-51	9.83829	8.77e-05	0.574	TCAGGTGTGCCTTGATTCG	Y	A	SAME
FBgn0039195-3R-20198433-20198733-.fasta	FBgn0039195	3R	A	-	0.954768	acg_avg	0	0	0	134	152	+	143	-93	12.7158	1.9e-05	0.362	AAAAGTTGGCTGTTAATTG	N	A	DIFF
FBgn0039197-3R-20210723-20211023-.fasta	FBgn0039197	3R	A	-	0.731114	lcns_avg	1.36129	1	1	139	157	+	148	-98	11.2195	4.36e-05	0.483	TCTTGCTGGCGTTGCTTAT	N	A	DIFF
FBgn0039199-3R-20216063-20216363+.fasta	FBgn0039199	3R	A	+	NA	NA	NA	0	0	231	249	-	240	-11	10.8742	5.22e-05	0.511	CGAAGCTGGCCGAGAACTG	Y	A	DIFF
FBgn0039218-3R-20542982-20543282+.fasta	FBgn0039218	3R	A	+	0.119867	ejd_avg	7.1966	13	3.80735	26	44	-	35	-216	11.3346	4.1e-05	0.469	TACTGCTGGCCGTGAGATG	N	A	DIFF
FBgn0039225-3R-20613525-20613825+.fasta	FBgn0039225	3R	A	+	0.991032	tes_avg	4.9314	5	2.58496	225	243	-	234	-17	10.1836	7.41e-05	0.557	GATAGGATGCCAGGCAATG	Y	A	DIFF
FBgn0039251-3R-20750687-20750987+.fasta	FBgn0039251	3R	A	+	0.871335	tes_avg	8.98373	70	6.14975	275	293	+	284	34	17.4349	7.01e-07	0.0939	CGCAGCAGGCTTTGTTTTT	N	A	SAME
FBgn0039277-3R-20938187-20938487-.fasta	FBgn0039277	3R	A	-	0.620723	atg_avg	3.81349	0	0	44	62	-	53	-3	11.2195	4.36e-05	0.483	GCCAGTGGTCATTTCCTTT	Y	A	SAME
FBgn0039300-3R-21073185-21073485-.fasta	FBgn0039300	3R	A	-	0.0768211	asg_avg	10.1136	323	8.33985	16	34	-	25	26	13.2913	1.35e-05	0.321	TTAAGTTGGCTGCGATTTA	N	A	SAME
FBgn0039301-3R-21073129-21073429+.fasta	FBgn0039301	3R	A	+	0.381384	ova_avg	5.24148	4	2.32193	72	90	-	81	-170	13.2913	1.35e-05	0.321	TTAAGTTGGCTGCGATTTA	N	A	DIFF
FBgn0039303-3R-21084369-21084669+.fasta	FBgn0039303	3R	A	+	0.164027	lsg_avg	8.38032	36	5.20945	118	136	+	127	-124	9.95339	8.3e-05	0.562	GGAAACTGGCTATGTTTTT	N	A	SAME
FBgn0039306-3R-21091315-21091615+.fasta	FBgn0039306	3R	A	+	0.161634	ova_avg	6.16762	8	3.16993	11	29	+	20	-231	10.0685	7.84e-05	0.562	CAAAGTTTCCTTCGCCTTT	N	A	SAME
FBgn0039308-3R-21095702-21096002+.fasta	FBgn0039308	3R	A	+	NA	NA	NA	20	4.39232	206	224	-	215	-36	11.3346	4.1e-05	0.469	AGAGGTGGGCATGGCTTTT	Y	A	DIFF
FBgn0039309-3R-21095702-21096002+.fasta	FBgn0039309	3R	A	+	NA	NA	NA	20	4.39232	206	224	-	215	-36	11.3346	4.1e-05	0.469	AGAGGTGGGCATGGCTTTT	Y	A	DIFF
FBgn0039331-3R-21183756-21184056+.fasta	FBgn0039331	3R	A	+	0.9721	tes_avg	9.17224	137	7.10852	157	175	+	166	-85	10.8742	5.22e-05	0.511	GATAGTAGTCGTTGCTCTT	N	A	SAME
FBgn0039336-3R-21302586-21302886-.fasta	FBgn0039336	3R	A	-	0.196743	ova_avg	3.72689	6	2.80735	233	251	-	242	-192	12.3705	2.32e-05	0.396	CATTGCTGGCCATGATTTC	N	A	SAME
FBgn0039344-3R-21408850-21409150-.fasta	FBgn0039344	3R	A	-	NA	NA	NA	0	0	140	158	+	149	-99	12.7158	1.9e-05	0.362	ACCAGAAATCATTGATTTT	N	A	DIFF
FBgn0039356-3R-21504154-21504454+.fasta	FBgn0039356	3R	A	+	0.336906	lsg_avg	6.04273	24	4.64386	44	62	+	53	-198	9.72319	9.27e-05	0.577	TGCAGTTCGCCTTGCTATT	N	A	SAME
FBgn0039367-3R-21601040-21601340-.fasta	FBgn0039367	3R	A	-	0.989433	tes_avg	7.45825	4	2.32193	156	174	+	165	-115	9.95339	8.3e-05	0.562	ATAAGCTGGCAGTTATTTC	N	A	DIFF
FBgn0039430-3R-22286998-22287298+.fasta	FBgn0039430	3R	A	+	0.219797	acr_avg	6.70748	15	4	141	159	+	150	-101	15.4782	3.19e-06	0.189	CACAGTTAGCTGTGATATT	N	A	SAME
FBgn0039464-3R-22784162-22784462-.fasta	FBgn0039464	3R	A	-	0.321973	lsg_avg	6.54561	10	3.45943	230	248	+	239	-189	10.5289	6.23e-05	0.537	CTAAGCAAGCAAGGCCAAT	N	A	DIFF
FBgn0039488-3R-22942378-22942678-.fasta	FBgn0039488	3R	A	-	NA	NA	NA	5	2.58496	268	286	+	277	-227	10.7591	5.54e-05	0.524	TGCTGTAAGCTTTGAAATA	N	A	DIFF
FBgn0039510-3R-23147996-23148296-.fasta	FBgn0039510	3R	A	-	0.962517	ltu_avg	0	0	0	134	152	+	143	-93	10.2987	7e-05	0.547	GGCAACTGGCGTTGAAATG	N	A	DIFF
FBgn0039511-3R-23156553-23156853-.fasta	FBgn0039511	3R	A	-	NA	NA	NA	485	8.92481	87	105	-	96	-46	14.2121	7.55e-06	0.255	GCCAGGTGGCCCTGATTTC	Y	A	SAME
FBgn0039553-3R-23737918-23738218+.fasta	FBgn0039553	3R	A	+	0.958193	tes_avg	11.0955	644	9.33316	195	213	+	204	-47	18.2406	3.47e-07	0.0787	AAAAGCGGGCCTTGCCTTT	Y	A	SAME
FBgn0039593-3R-24496175-24496475+.fasta	FBgn0039593	3R	A	+	0.787617	lfb_avg	0	0	0	57	75	-	66	-185	9.72319	9.27e-05	0.577	CCAAAGATGCATTTATTTT	N	A	DIFF
FBgn0039599-3R-24615993-24616293+.fasta	FBgn0039599	3R	A	+	0.971896	acg_avg	0.664228	7	3	116	134	-	125	-126	13.1762	1.44e-05	0.333	TGCAGTTTGCCTAGACTTA	N	A	DIFF
FBgn0039621-3R-24850442-24850742+.fasta	FBgn0039621	3R	A	+	0.887567	acg_avg	0	0	0	243	261	+	252	2	10.2987	7e-05	0.547	CCAAGTAGTCATGAAAATA	N	A	SAME
FBgn0039634-3R-24938493-24938793-.fasta	FBgn0039634	3R	A	-	0.234608	abr_avg	6.33622	3	2	60	78	+	69	-19	9.83829	8.77e-05	0.574	GCTAGCAATCATTTACTTT	Y	A	DIFF
FBgn0039635-3R-24938542-24938842+.fasta	FBgn0039635	3R	A	+	0.101131	aeye_avg	10.2235	235	7.88264	11	29	+	20	-231	9.83829	8.77e-05	0.574	GCTAGCAATCATTTACTTT	N	A	SAME
FBgn0039659-3R-25122851-25123151-.fasta	FBgn0039659	3R	A	-	0.969308	tes_avg	5.57469	5	2.58496	142	160	-	151	-101	11.4497	3.86e-05	0.458	CAGAGTTGGCTTTGGGTTT	N	A	SAME
FBgn0039671-3R-25415433-25415733-.fasta	FBgn0039671	3R	A	-	0.95542	lmg_avg	0	0	0	27	45	-	36	15	10.2987	7e-05	0.547	CAAAGCAAGCCAAGATCTT	N	A	SAME
FBgn0039683-3R-25518062-25518362+.fasta	FBgn0039683	3R	A	+	1	lcns_avg	0	0	0	100	118	+	109	-142	9.95339	8.3e-05	0.562	TCCAGTTTGCATGTACATG	N	A	SAME
FBgn0039696-3R-25625025-25625325-.fasta	FBgn0039696	3R	A	-	0.254199	ova_avg	4.86802	5	2.58496	177	195	+	186	-136	11.9101	3e-05	0.431	GGAAGCAGGCCTGTTTTTT	N	A	DIFF
FBgn0039712-3R-25687165-25687465-.fasta	FBgn0039712	3R	A	-	0.142816	ova_avg	5.71659	19	4.32193	76	94	+	85	-35	9.60809	9.8e-05	0.582	GCAAGCTGGCCACACCTTA	Y	A	DIFF
FBgn0039727-3R-25761449-25761749+.fasta	FBgn0039727	3R	A	+	0.350557	tes_avg	9.02141	19	4.32193	69	87	-	78	-173	11.3346	4.1e-05	0.469	GGAAAATGGCCAGGATTTT	N	A	DIFF
FBgn0039728-3R-25808897-25809197+.fasta	FBgn0039728	3R	A	+	0.809214	ltr_avg	0	0	0	225	243	+	234	-17	9.60809	9.8e-05	0.582	CCCAGTGAGCTCGGCTTTC	Y	A	SAME
FBgn0039741-3R-25871941-25872241+.fasta	FBgn0039741	3R	A	+	0.177832	ova_avg	5.01511	2	1.58496	174	192	+	183	-68	10.1836	7.41e-05	0.557	TTAAATATGCTTTGCCTCT	Y	A	SAME
FBgn0039743-3R-25877985-25878285+.fasta	FBgn0039743	3R	A	+	0.17788	lcns_avg	8.02107	34	5.12928	89	107	-	98	-153	11.9101	3e-05	0.431	TTTAGCAGGCATTGCTCAT	N	A	DIFF
FBgn0039743-3R-25877985-25878285+.fasta	FBgn0039743	3R	A	+	0.17788	lcns_avg	8.02107	34	5.12928	199	217	+	208	-43	10.8742	5.22e-05	0.511	AATAGTAAGCAGTGTGTTT	Y	A	SAME
FBgn0039751-3R-26003371-26003671-.fasta	FBgn0039751	3R	A	-	0.155532	abr_avg	4.10014	5	2.58496	218	236	+	227	-177	10.5289	6.23e-05	0.537	TCCAATTGCCTTTGCTTTG	N	A	DIFF
FBgn0039752-3R-26003348-26003648+.fasta	FBgn0039752	3R	A	+	0.910617	tes_avg	10.2079	190	7.57743	241	259	+	250	-1	10.5289	6.23e-05	0.537	TCCAATTGCCTTTGCTTTG	Y	A	SAME
FBgn0039754-3R-26016750-26017050-.fasta	FBgn0039754	3R	A	-	0.684435	ejd_avg	5.2855	7	3	224	242	+	233	-183	13.6366	1.09e-05	0.296	CCAAGAAGGCCAAGATTAT	N	A	DIFF
FBgn0039787-3R-26404900-26405200+.fasta	FBgn0039787	3R	A	+	0.818039	acg_avg	0.919363	4	2.32193	261	279	+	270	20	9.95339	8.3e-05	0.562	TGCAGGGGGCTTTGATCAT	N	A	SAME
FBgn0039790-3R-26427160-26427460-.fasta	FBgn0039790	3R	A	-	0.170601	aeye_avg	6.25016	7	3	174	192	-	183	-133	11.1044	4.63e-05	0.49	CATAGTATGCATGTAAATT	N	A	SAME
FBgn0039790-3R-26427160-26427460-.fasta	FBgn0039790	3R	A	-	0.170601	aeye_avg	6.25016	7	3	235	253	-	244	-194	10.5289	6.23e-05	0.537	TGAAGTAGCCCTTGAACAG	N	A	SAME
FBgn0039817-3R-26926840-26927140-.fasta	FBgn0039817	3R	A	-	0.742274	lfb_avg	0	2	1.58496	224	242	+	233	-183	9.60809	9.8e-05	0.582	CTCTGCTGGCTTTGTTATT	N	A	DIFF
FBgn0039818-3R-26934862-26935162-.fasta	FBgn0039818	3R	A	-	0.881586	lmg_avg	0	0	0	34	52	-	43	8	10.7591	5.54e-05	0.524	CTCAGTGTGCCGCGATATT	N	A	SAME
FBgn0039827-3R-27022387-27022687+.fasta	FBgn0039827	3R	A	+	0.558743	lfb_avg	3.35532	1	1	134	152	+	143	-108	11.6799	3.4e-05	0.446	AAAAGTAGGCACTACTTTT	N	A	SAME
FBgn0039873-3R-27587250-27587550-.fasta	FBgn0039873	3R	A	-	0.922645	ltu_avg	0	7	3	188	206	-	197	-147	10.4138	6.6e-05	0.543	GCAAGCAAGCCGGGGAATT	N	A	SAME
FBgn0039875-3R-27597690-27597990+.fasta	FBgn0039875	3R	A	+	0.157503	lsg_avg	9.50529	60	5.93074	168	186	+	177	-74	11.3346	4.1e-05	0.469	TGAAATAGTCCGTGACATG	Y	A	SAME
FBgn0039908-4-504378-504678-.fasta	FBgn0039908	4	A	-	0.461423	abr_avg	3.0207	1	1	93	111	-	102	-52	14.6725	5.57e-06	0.229	GTCAGCTGGCTTTGAGTTC	Y	A	SAME
FBgn0040063-2R-19132758-19133058-.fasta	FBgn0040063	2R	A	-	0.943505	tes_avg	7.48846	23	4.58496	172	190	-	181	-131	16.6292	1.35e-06	0.127	TCAAGTTGGCTTTTAATTG	N	A	SAME
FBgn0040089-X-19607027-19607327-.fasta	FBgn0040089	X	X	-	0.559853	afb_avg	5.14101	13	3.80735	249	267	-	258	-208	11.9101	3e-05	0.431	CCCAGAAGGCATCGCCATC	N	X	SAME
FBgn0040096-2L-11001821-11002121+.fasta	FBgn0040096	2L	A	+	0.866793	aht_avg	3.6649	2	1.58496	47	65	+	56	-195	10.644	5.88e-05	0.534	ATTAACAGGCTTTGAATAT	N	A	SAME
FBgn0040233-2L-11269529-11269829+.fasta	FBgn0040233	2L	A	+	NA	NA	NA	18	4.24793	38	56	+	47	-204	13.1762	1.44e-05	0.333	GTAAGTAAGCATTTAATTT	N	A	SAME
FBgn0040362-X-1073947-1074247+.fasta	FBgn0040362	X	X	+	0.885791	tes_avg	8.8917	25	4.70044	201	219	-	210	-41	12.6007	2.03e-05	0.374	ACAAGTATTCCTTGTTATT	Y	X	DIFF
FBgn0040506-2L-12925360-12925660+.fasta	FBgn0040506	2L	A	+	1	tes_avg	5.33909	2	1.58496	169	187	+	178	-73	13.2913	1.35e-05	0.321	TAAAGTAGGCTGTGTGTTC	Y	A	SAME
FBgn0040506-2L-12925360-12925660+.fasta	FBgn0040506	2L	A	+	1	tes_avg	5.33909	2	1.58496	258	276	-	267	17	10.644	5.88e-05	0.534	CCTAGGGAGCGAGGCATTT	N	A	DIFF
FBgn0040508-2L-12912279-12912579+.fasta	FBgn0040508	2L	A	+	0.943673	tes_avg	9.16302	22	4.52356	244	262	-	253	3	10.4138	6.6e-05	0.543	ATAAGCTGGCTATGTTTCT	N	A	DIFF
FBgn0040510-2L-12920840-12921140+.fasta	FBgn0040510	2L	A	+	0.966737	tes_avg	9.07652	13	3.80735	197	215	+	206	-45	14.2121	7.55e-06	0.255	CTAAGCAGGCTTTGAGTCC	Y	A	SAME
FBgn0040666-2R-20650554-20650854-.fasta	FBgn0040666	2R	A	-	0.069204	fsv_avg	7.17126	35	5.16993	17	35	-	26	25	10.2987	7e-05	0.547	TTCAGTTGTCCAGGAGTCG	N	A	SAME
FBgn0040688-3L-98324-98624-.fasta	FBgn0040688	3L	A	-	NA	NA	NA	0	0	106	124	-	115	-65	9.95339	8.3e-05	0.562	CTAAGCAGGCATTTCCACG	Y	A	SAME
FBgn0040732-2R-15388777-15389077-.fasta	FBgn0040732	2R	A	-	0.594604	lfb_avg	0.833427	15	4	215	233	+	224	-174	12.7158	1.9e-05	0.362	TGCAGTTGTCATTGTTTTG	N	A	DIFF
FBgn0040737-2R-14199076-14199376+.fasta	FBgn0040737	2R	A	+	NA	NA	NA	0	0	127	145	+	136	-115	11.9101	3e-05	0.431	TTAAATAAGCAATGAGTTT	N	A	SAME
FBgn0040747-2R-10820769-10821069+.fasta	FBgn0040747	2R	A	+	0.926123	tes_avg	11.3268	790	9.62753	196	214	+	205	-46	15.248	3.75e-06	0.206	CTAAGCAAGCGTTGACATT	Y	A	SAME
FBgn0040780-2R-3719425-3719725+.fasta	FBgn0040780	2R	A	+	0.933199	ltr_avg	0	0	0	195	213	+	204	-47	9.95339	8.3e-05	0.562	GGCAGTTGGCCGTAACTAA	Y	A	SAME
FBgn0040784-X-20004557-20004857-.fasta	FBgn0040784	X	X	-	NA	NA	NA	82	6.37504	53	71	-	62	-12	9.60809	9.8e-05	0.582	TCAAGTTGGCATGTCGCTG	Y	X	SAME
FBgn0040786-3L-19800248-19800548-.fasta	FBgn0040786	3L	A	-	0.31726	lcns_avg	4.65256	20	4.39232	66	84	+	75	-25	9.95339	8.3e-05	0.562	AGCTGTGTGCATTGCATTT	Y	A	DIFF
FBgn0040797-3L-16265758-16266058+.fasta	FBgn0040797	3L	A	+	0.841788	lmg_avg	5.36665	0	0	207	225	+	216	-35	10.8742	5.22e-05	0.511	TCAAGGATGCTATGTATAT	Y	A	SAME
FBgn0040809-3L-14937380-14937680-.fasta	FBgn0040809	3L	A	-	NA	NA	NA	0	0	277	295	-	286	-236	11.1044	4.63e-05	0.49	TCAAGTAGGCAACACATTG	N	A	SAME
FBgn0040812-3L-13836066-13836366-.fasta	FBgn0040812	3L	A	-	0.973415	tes_avg	9.5444	577	9.17493	42	60	-	51	-1	10.1836	7.41e-05	0.557	CCTAGTAGGCTTGACCTAA	Y	A	SAME
FBgn0040871-X-14045988-14046288-.fasta	FBgn0040871	X	X	-	0.92545	tes_avg	8.7712	58	5.88264	108	126	-	117	-67	12.946	1.66e-05	0.35	CCCAGTGTGCTCTGATATT	Y	X	SAME
FBgn0040904-X-4170982-4171282-.fasta	FBgn0040904	X	X	-	0.966371	tes_avg	10.256	160	7.33092	107	125	-	116	-66	12.1403	2.64e-05	0.414	TGTAGTTGGCTTGCCTTTT	Y	X	SAME
FBgn0040905-X-4171943-4172243-.fasta	FBgn0040905	X	X	-	0.966556	tes_avg	9.49126	640	9.32418	109	127	-	118	-68	19.7369	7.99e-08	0.042	TGTAGTTGGCATTGCCTTT	Y	X	SAME
FBgn0040964-2L-8997354-8997654+.fasta	FBgn0040964	2L	A	+	0.592111	atg_avg	5.07761	8	3.16993	188	206	-	197	-54	11.9101	3e-05	0.431	GAAAGCAGTCACGGAATTT	Y	A	DIFF
FBgn0040996-2L-20294450-20294750+.fasta	FBgn0040996	2L	A	+	0.949193	tes_avg	10.219	161	7.33985	236	254	+	245	-6	9.60809	9.8e-05	0.582	TTCAGCAGGCTGTGGGTCT	Y	A	SAME
FBgn0041092-2L-9166527-9166827+.fasta	FBgn0041092	2L	A	+	0.234971	lfb_avg	4.45631	3	2	12	30	-	21	-230	12.4856	2.17e-05	0.38	GTCAGTTGGCAGTGCTACT	N	A	DIFF
FBgn0041147-3L-3905093-3905393+.fasta	FBgn0041147	3L	A	+	0.472607	ova_avg	5.98479	9	3.32193	70	88	-	79	-172	9.83829	8.77e-05	0.574	CCAAGGTGGCCACTTATTT	N	A	DIFF
FBgn0041191-3R-1394392-1394692+.fasta	FBgn0041191	3R	A	+	0.104295	fsv_avg	7.77449	33	5.08746	137	155	+	146	-105	10.8742	5.22e-05	0.511	CCGAACGGGCCTTGATATT	N	A	SAME
FBgn0041235-2R-18991205-18991505-.fasta	FBgn0041235	2R	A	-	0.970152	acg_avg	0	0	0	10	28	+	19	32	10.644	5.88e-05	0.534	ACCAGTAGGCAATGAGCAA	N	A	DIFF
FBgn0041235-2R-18991205-18991505-.fasta	FBgn0041235	2R	A	-	0.970152	acg_avg	0	0	0	167	185	-	176	-126	10.7591	5.54e-05	0.524	TGTAGCGTGCATTTAATTT	N	A	SAME
FBgn0041709-3L-2272718-2273018-.fasta	FBgn0041709	3L	A	-	0.982652	ova_avg	0	0	0	272	290	-	281	-231	13.5215	1.17e-05	0.305	TTAAGTTTGCATTTCATTT	N	A	SAME
FBgn0041712-2R-19265805-19266105+.fasta	FBgn0041712	2R	A	+	0.708987	asg_avg	3.8381	2	1.58496	7	25	+	16	-235	9.95339	8.3e-05	0.562	TGAAGCTTGCCATCAATAT	N	A	SAME
FBgn0042102-3R-3611790-3612090-.fasta	FBgn0042102	3R	A	-	0.84798	lmg_avg	0	0	0	220	238	-	229	-179	11.9101	3e-05	0.431	TCAAGAAGTCCTTGGGATT	N	A	SAME
FBgn0042104-3R-3609117-3609417-.fasta	FBgn0042104	3R	A	-	0.573574	amg_avg	4.85928	0	0	89	107	-	98	-48	10.7591	5.54e-05	0.524	GCAAGCAGTCCAGAAGTTT	Y	A	SAME
FBgn0042118-3L-6143906-6144206-.fasta	FBgn0042118	3L	A	-	NA	NA	NA	0	0	30	48	-	39	12	11.2195	4.36e-05	0.483	TATAGTAATCATTGAGTCT	N	A	SAME
FBgn0042129-2L-19966459-19966759-.fasta	FBgn0042129	2L	A	-	0.807727	acr_avg	2.28627	0	0	6	24	+	15	36	11.795	3.2e-05	0.442	GTCTGCTGGCCATGATTTG	N	A	DIFF
FBgn0042173-2R-3716316-3716616+.fasta	FBgn0042173	2R	A	+	NA	NA	NA	5	2.58496	194	212	+	203	-48	9.95339	8.3e-05	0.562	GGCAGTTGGCCGTAACTAA	Y	A	SAME
FBgn0042189-2L-6800783-6801083-.fasta	FBgn0042189	2L	A	-	0.925415	tes_avg	11.7633	3271	11.676	124	142	-	133	-83	21.3483	1.19e-08	0.0125	TAAAGTTGGCCATGACTTT	N	A	SAME
FBgn0042189-2L-6800783-6801083-.fasta	FBgn0042189	2L	A	-	0.925415	tes_avg	11.7633	3271	11.676	146	164	-	155	-105	21.5785	8.72e-09	0.0125	CGAAGTAGGCCATGAAATT	N	A	SAME
FBgn0043005-3R-19524698-19524998-.fasta	FBgn0043005	3R	A	-	0.843113	abr_avg	3.72571	2	1.58496	59	77	+	68	-18	10.2987	7e-05	0.547	ACAAGTTGCCTTTCCATTT	Y	A	DIFF
FBgn0044046-X-3561403-3561703+.fasta	FBgn0044046	X	X	+	0.913334	atg_avg	0.707772	1	1	126	144	-	135	-116	11.1044	4.63e-05	0.49	CGAAGCTGGCATAAATTTT	N	X	DIFF
FBgn0045063-2R-8394787-8395087-.fasta	FBgn0045063	2R	A	-	0.194973	aeye_avg	5.42719	20	4.39232	50	68	+	59	-9	10.1836	7.41e-05	0.557	CGAAAATGGCGTTGAAATA	Y	A	DIFF
FBgn0045469-3R-17670936-17671236-.fasta	FBgn0045469	3R	A	-	NA	NA	NA	1	1	191	209	+	200	-150	10.0685	7.84e-05	0.562	ATTAGTAGGCTTGAAATTG	N	A	DIFF
FBgn0045501-2L-1794866-1795166-.fasta	FBgn0045501	2L	A	-	1	tes_avg	0.92453	0	0	1	19	+	10	41	13.9819	8.76e-06	0.272	TGAAGCGGGCCAAGCCTTT	N	A	DIFF
FBgn0046113-2L-913835-914135+.fasta	FBgn0046113	2L	A	+	0.650014	aht_avg	5.24859	13	3.80735	253	271	+	262	12	11.1044	4.63e-05	0.49	CCCAGTTGCCATGGAATCG	N	A	SAME
FBgn0046697-YHet-156491-156791+.fasta	FBgn0046697	YHet	A	+	NA	NA	NA	3	2	97	115	+	106	-145	15.7084	2.7e-06	0.186	CCAAGCTGGCCTTTTTTTT	N	A	SAME
FBgn0046878-3R-1933605-1933905+.fasta	FBgn0046878	3R	A	+	0.848548	fsv_avg	0	0	0	187	205	+	196	-55	9.72319	9.27e-05	0.577	TTAAGTGTGCAATGCCTAA	Y	A	SAME
FBgn0046880-2R-15586800-15587100-.fasta	FBgn0046880	2R	A	-	0.868404	lmg_avg	0	0	0	212	230	+	221	-171	9.95339	8.3e-05	0.562	ACCAGTAGGCGTTAAATCA	N	A	DIFF
FBgn0046888-2L-17181687-17181987+.fasta	FBgn0046888	2L	A	+	0.971627	fsv_avg	0	0	0	8	26	-	17	-234	9.60809	9.8e-05	0.582	TTCAATAAGCTTTGTTTTT	N	A	DIFF
FBgn0047199-3R-9773906-9774206+.fasta	FBgn0047199	3R	A	+	0.982014	ova_avg	2.59298	12	3.70044	148	166	-	157	-94	11.1044	4.63e-05	0.49	CAAAGTTGGCTTTATTTTG	N	A	DIFF
FBgn0050007-2R-5779209-5779509+.fasta	FBgn0050007	2R	A	+	0.528028	tes_avg	6.98686	10	3.45943	77	95	+	86	-165	12.1403	2.64e-05	0.414	ATTAGCTAGCTATGAAATT	N	A	SAME
FBgn0050010-2R-5750905-5751205+.fasta	FBgn0050010	2R	A	+	0.154873	fsv_avg	1.79269	0	0	83	101	-	92	-159	11.6799	3.4e-05	0.446	AAAAGTATGCTAAGCTTTT	N	A	DIFF
FBgn0050011-2R-6011542-6011842+.fasta	FBgn0050011	2R	A	+	0.15916	atg_avg	6.13179	6	2.80735	32	50	+	41	-210	13.8668	9.42e-06	0.274	GAAAATTAGCCTTGCCTTT	N	A	SAME
FBgn0050051-2R-8323374-8323674+.fasta	FBgn0050051	2R	A	+	0.149244	lsg_avg	8.23967	62	5.97728	199	217	+	208	-43	10.7591	5.54e-05	0.524	CCAAAATGGCGTTGCCATG	Y	A	SAME
FBgn0050056-2R-8449314-8449614+.fasta	FBgn0050056	2R	A	+	0.971397	tes_avg	9.32543	248	7.96	234	252	+	243	-8	10.644	5.88e-05	0.534	TACAGTGTGCGGTGCGTTA	Y	A	SAME
FBgn0050065-2R-9320282-9320582+.fasta	FBgn0050065	2R	A	+	0.972708	tes_avg	9.43912	174	7.45121	38	56	+	47	-204	9.95339	8.3e-05	0.562	AGAAATTAGCAATGATTTG	N	A	SAME
FBgn0050076-2R-10433826-10434126-.fasta	FBgn0050076	2R	A	-	NA	NA	NA	0	0	173	191	+	182	-132	15.1329	4.07e-06	0.215	GCTAGTTGGCTTTGAGCTT	N	A	DIFF
FBgn0050089-2R-11614635-11614935+.fasta	FBgn0050089	2R	A	+	0.918372	acr_avg	0.826613	1	1	213	231	+	222	-29	14.5574	6.02e-06	0.237	CCAAGTTAGCATTGAAAAG	Y	A	SAME
FBgn0050093-2R-11831282-11831582+.fasta	FBgn0050093	2R	A	+	0.856905	tes_avg	10.2353	123	6.9542	279	297	+	288	38	9.72319	9.27e-05	0.577	TCAAGCTAGCTTAGCCATC	N	A	SAME
FBgn0050096-2R-12209578-12209878-.fasta	FBgn0050096	2R	A	-	0.624502	ova_avg	0.536855	0	0	108	126	+	117	-67	12.946	1.66e-05	0.35	CGCAGCTTGCACTGCTATT	Y	A	DIFF
FBgn0050098-2R-12242669-12242969-.fasta	FBgn0050098	2R	A	-	0.927617	fsv_avg	0	0	0	222	240	+	231	-181	12.946	1.66e-05	0.35	TAAGGGAGGCCTTGTTTTT	N	A	DIFF
FBgn0050147-2R-16505671-16505971-.fasta	FBgn0050147	2R	A	-	0.488995	lhg_avg	3.96601	1	1	134	152	-	143	-93	10.0685	7.84e-05	0.562	CGCAGTTGCCTTTGCGAAG	N	A	SAME
FBgn0050192-2R-19025852-19026152+.fasta	FBgn0050192	2R	A	+	0.969774	tes_avg	10.1632	94	6.56986	211	229	+	220	-31	16.0537	2.1e-06	0.164	CCAAGTAATCCATGCTTTA	Y	A	SAME
FBgn0050222-2R-17470746-17471046+.fasta	FBgn0050222	2R	A	+	0.961365	tes_avg	9.17298	69	6.12928	214	232	+	223	-28	13.0611	1.55e-05	0.344	CACAGCAGCCCTTGACACT	Y	A	SAME
FBgn0050273-2R-18554409-18554709+.fasta	FBgn0050273	2R	A	+	0.649457	ltu_avg	1.99293	18	4.24793	149	167	-	158	-93	13.1762	1.44e-05	0.333	TCTTGTTTGCATTGCTTTT	N	A	DIFF
FBgn0050280-2R-18000843-18001143+.fasta	FBgn0050280	2R	A	+	0.908783	afb_avg	0	0	0	165	183	-	174	-77	10.0685	7.84e-05	0.562	AATTGTTGGCTTTGTTTTT	Y	A	DIFF
FBgn0050293-2R-16952440-16952740-.fasta	FBgn0050293	2R	A	-	0.975384	tes_avg	9.69734	147	7.20945	67	85	-	76	-26	12.3705	2.32e-05	0.396	TTCAGTTATCTATGCGTTT	Y	A	SAME
FBgn0050324-2R-12175687-12175987-.fasta	FBgn0050324	2R	A	-	0.953246	tes_avg	11.0938	252	7.98299	53	71	-	62	-12	12.7158	1.9e-05	0.362	TCTAGTTGCCAAGGAGTTT	Y	A	SAME
FBgn0050338-2R-5481299-5481599+.fasta	FBgn0050338	2R	A	+	0.14684	ejd_avg	5.54111	15	4	166	184	-	175	-76	10.0685	7.84e-05	0.562	TACAATAATCGTTGAATTT	Y	A	DIFF
FBgn0050360-2R-4352412-4352712+.fasta	FBgn0050360	2R	A	+	0.89043	amg_avg	4.91941	8	3.16993	112	130	+	121	-130	10.2987	7e-05	0.547	CTAAGCAGCCGATGAGTTC	N	A	SAME
FBgn0050369-2R-4146540-4146840+.fasta	FBgn0050369	2R	A	+	0.990869	tes_avg	9.18782	54	5.78136	202	220	-	211	-40	10.1836	7.41e-05	0.557	GTAAATAGGCATGGATTCT	Y	A	DIFF
FBgn0050371-2R-4156788-4157088-.fasta	FBgn0050371	2R	A	-	0.767342	asg_avg	0	7	3	10	28	+	19	32	10.0685	7.84e-05	0.562	GGCAGGTGTCTTAGCATTT	N	A	DIFF
FBgn0050381-2R-3818470-3818770-.fasta	FBgn0050381	2R	A	-	0.686446	amg_avg	0	1	1	219	237	-	228	-178	11.6799	3.4e-05	0.446	CATAGAGGGCAATGAAATG	N	A	SAME
FBgn0050385-2R-3068580-3068880+.fasta	FBgn0050385	2R	A	+	NA	NA	NA	5	2.58496	207	225	+	216	-35	9.72319	9.27e-05	0.577	TTTAGTAAGCATGACCTTT	Y	A	SAME
FBgn0050393-2R-17155033-17155333-.fasta	FBgn0050393	2R	A	-	0.943087	tes_avg	9.838	93	6.55459	78	96	-	87	-37	14.097	8.13e-06	0.265	TAAAATAGGCCTTTCCTTT	Y	A	SAME
FBgn0050416-2R-19210871-19211171-.fasta	FBgn0050416	2R	A	-	NA	NA	NA	72	6.18982	78	96	-	87	-37	11.2195	4.36e-05	0.483	CGAAGTATGCCTTGTAAAC	Y	A	SAME
FBgn0050438-2R-1383928-1384228+.fasta	FBgn0050438	2R	A	+	0.77236	acg_avg	1.91716	12	3.70044	259	277	-	268	18	10.644	5.88e-05	0.534	CTAAGAAAGCCTGGAGTAA	N	A	DIFF
FBgn0050447-2R-15834475-15834775+.fasta	FBgn0050447	2R	A	+	0.959773	tes_avg	9.10769	50	5.67243	206	224	+	215	-36	13.4064	1.25e-05	0.313	CATAGTAGGCTTCGAAATC	Y	A	SAME
FBgn0050491-2R-3542326-3542626+.fasta	FBgn0050491	2R	A	+	0.1948	tes_avg	8.69082	43	5.45943	273	291	+	282	32	11.2195	4.36e-05	0.483	TCGAGTTGGCGCTGACTTA	N	A	SAME
FBgn0051019-3R-26422475-26422775+.fasta	FBgn0051019	3R	A	+	1	tes_avg	0.734488	0	0	51	69	+	60	-191	9.72319	9.27e-05	0.577	GATGGGATGCCTTGATTTA	N	A	SAME
FBgn0051025-3R-25954790-25955090-.fasta	FBgn0051025	3R	A	-	0.954976	tes_avg	11.1671	1123	10.1344	81	99	-	90	-40	14.9027	4.77e-06	0.219	CCCAGGATGCCGTGAGTTC	Y	A	SAME
FBgn0051080-3R-22459203-22459503+.fasta	FBgn0051080	3R	A	+	0.71306	ejd_avg	0.911561	0	0	151	169	-	160	-91	9.60809	9.8e-05	0.582	ATTGGCTGTCTTTGATTTT	N	A	DIFF
FBgn0051081-3R-22460356-22460656+.fasta	FBgn0051081	3R	A	+	NA	NA	NA	0	0	220	238	-	229	-22	10.5289	6.23e-05	0.537	GCAAGAGGGCAAAGCATTT	Y	A	DIFF
FBgn0051086-3R-22010722-22011022+.fasta	FBgn0051086	3R	A	+	NA	NA	NA	NA	NA	241	259	-	250	-1	10.2987	7e-05	0.547	CGCAGTTTTCGTTGCTAAT	Y	A	DIFF
FBgn0051093-3R-21616142-21616442-.fasta	FBgn0051093	3R	A	-	0.931715	tes_avg	9.05194	76	6.26679	97	115	-	106	-56	10.2987	7e-05	0.547	GAAAGTAGTCCTTGAACCA	Y	A	SAME
FBgn0051103-3R-21044789-21045089+.fasta	FBgn0051103	3R	A	+	0.732192	ltr_avg	0.684802	0	0	279	297	-	288	38	12.4856	2.17e-05	0.38	TCCAGTGAGCTGTGCATCT	N	A	DIFF
FBgn0051216-3R-15496921-15497221+.fasta	FBgn0051216	3R	A	+	0.618615	atg_avg	0	1	1	250	268	+	259	9	10.4138	6.6e-05	0.543	CTCAGTTGGCATTAAGCTT	N	A	SAME
FBgn0051226-3R-14677469-14677769-.fasta	FBgn0051226	3R	A	-	0.910147	tes_avg	11.9139	2121	11.0512	117	135	-	126	-76	9.83829	8.77e-05	0.574	TCTTATTAGCCTTGAGTTT	Y	A	SAME
FBgn0051226-3R-14677469-14677769-.fasta	FBgn0051226	3R	A	-	0.910147	tes_avg	11.9139	2121	11.0512	160	178	+	169	-119	17.7802	5.22e-07	0.0894	TATAGTAGGCTTTGATTAT	N	A	DIFF
FBgn0051245-3R-15202896-15203196-.fasta	FBgn0051245	3R	A	-	0.990277	tes_avg	9.96835	142	7.15987	73	91	-	82	-32	13.8668	9.42e-06	0.274	TTTAGTAGTCCTAGATTTT	Y	A	SAME
FBgn0051281-3R-18791755-18792055+.fasta	FBgn0051281	3R	A	+	0.839226	tes_avg	8.4387	178	7.48382	198	216	+	207	-44	13.4064	1.25e-05	0.313	TGTAGAAAGCATGGCATTT	Y	A	SAME
FBgn0051287-3R-12028842-12029142+.fasta	FBgn0051287	3R	A	+	NA	NA	NA	143	7.16993	211	229	+	220	-31	15.1329	4.07e-06	0.215	CTTAGCAAGCTTTGATTTG	Y	A	SAME
FBgn0051406-3R-6174232-6174532+.fasta	FBgn0051406	3R	A	+	0.953766	tes_avg	9.19992	111	6.80735	128	146	-	137	-114	10.5289	6.23e-05	0.537	CTTAGCTTGCAGTTCATTT	N	A	DIFF
FBgn0051413-3R-19528232-19528532+.fasta	FBgn0051413	3R	A	+	0.962799	acg_avg	0.766936	7	3	108	126	+	117	-134	10.0685	7.84e-05	0.562	TGAAATAGGCAAGGTGTTT	N	A	SAME
FBgn0051415-3R-5568988-5569288+.fasta	FBgn0051415	3R	A	+	0.969931	tes_avg	9.89092	181	7.50779	207	225	+	216	-35	9.95339	8.3e-05	0.562	CCTAATATGCACTGAATTA	Y	A	SAME
FBgn0051423-3R-17945125-17945425-.fasta	FBgn0051423	3R	A	-	0.937245	fsv_avg	0	0	0	54	72	+	63	-13	10.8742	5.22e-05	0.511	TTTAGTTAGCCTTGGGTTA	Y	A	DIFF
FBgn0051473-3R-3637285-3637585+.fasta	FBgn0051473	3R	A	+	0.876152	tes_avg	9.99209	199	7.64386	261	279	+	270	20	10.9893	4.92e-05	0.503	ACAAGTAGCCTAAGCATTT	N	A	SAME
FBgn0051482-3R-2426713-2427013+.fasta	FBgn0051482	3R	A	+	0.92673	tes_avg	10.3306	101	6.67243	39	57	+	48	-203	12.6007	2.03e-05	0.374	CTCAGCTTTCCATGCATTA	N	A	SAME
FBgn0051538-3R-1103506-1103806-.fasta	FBgn0051538	3R	A	-	0.891091	tes_avg	11.5861	1020	9.99577	43	61	-	52	-2	11.1044	4.63e-05	0.49	TCAAGCAGTCGTTGTCTCT	Y	A	SAME
FBgn0051600-2L-21915307-21915607-.fasta	FBgn0051600	2L	A	-	0.943394	tes_avg	7.98146	16	4.08746	65	83	-	74	-24	9.72319	9.27e-05	0.577	TGTGGTAGGCCATTATTTC	Y	A	SAME
FBgn0051626-2L-21236682-21236982-.fasta	FBgn0051626	2L	A	-	0.690384	acr_avg	4.07933	3	2	66	84	-	75	-25	9.83829	8.77e-05	0.574	CAAAGTAGTCGATAATTTA	Y	A	SAME
FBgn0051639-2L-6155037-6155337-.fasta	FBgn0051639	2L	A	-	NA	NA	NA	1995	10.9629	93	111	-	102	-52	12.6007	2.03e-05	0.374	TATAGTATGCCATGAAAAA	Y	A	SAME
FBgn0051642-2L-6118261-6118561+.fasta	FBgn0051642	2L	A	+	0.880335	tes_avg	8.17489	113	6.83289	174	192	+	183	-68	12.0252	2.81e-05	0.43	TCGAGTTGGCAGCGCCTTT	Y	A	SAME
FBgn0051677-2L-20604145-20604445-.fasta	FBgn0051677	2L	A	-	0.877394	acg_avg	6.88303	13	3.80735	78	96	-	87	-37	11.3346	4.1e-05	0.469	GCAAATAGGCCTGGAAAAG	Y	A	SAME
FBgn0051679-2L-2238200-2238500-.fasta	FBgn0051679	2L	A	-	0.966489	tes_avg	9.86203	87	6.45943	7	25	+	16	35	10.2987	7e-05	0.547	ATAAGTGGGCCTTACAATA	N	A	DIFF
FBgn0051715-2L-10341365-10341665+.fasta	FBgn0051715	2L	A	+	0.150173	lmg_avg	8.13874	63	6	18	36	-	27	-224	9.83829	8.77e-05	0.574	TGCTGTTGGCTTTGGAATT	N	A	DIFF
FBgn0051728-2L-13251258-13251558+.fasta	FBgn0051728	2L	A	+	0.877827	ltr_avg	0	0	0	194	212	-	203	-48	14.2121	7.55e-06	0.255	CTCAGTTGGCCATTAATAT	Y	A	DIFF
FBgn0051730-2L-13259590-13259890-.fasta	FBgn0051730	2L	A	-	0.931385	tes_avg	9.35532	18	4.24793	128	146	-	137	-87	12.1403	2.64e-05	0.414	TTAAGCAGGCCACTAGTTT	N	A	SAME
FBgn0051740-2L-18008702-18009002+.fasta	FBgn0051740	2L	A	+	0.86209	tes_avg	11.5642	3385	11.7254	183	201	+	192	-59	13.9819	8.76e-06	0.272	TCTAGTTGGCCTTGGAAAT	Y	A	SAME
FBgn0051776-2L-3469931-3470231+.fasta	FBgn0051776	2L	A	+	0.950468	tes_avg	6.85709	9	3.32193	213	231	+	222	-29	14.6725	5.57e-06	0.229	ACAAGTAGGCCAGGAAAAG	Y	A	SAME
FBgn0051777-2L-3707012-3707312-.fasta	FBgn0051777	2L	A	-	0.551217	fsv_avg	6.44609	1	1	108	126	-	117	-67	15.7084	2.7e-06	0.186	TGTAGTTGGCTGTGCTTTC	Y	A	SAME
FBgn0051777-2L-3707012-3707312-.fasta	FBgn0051777	2L	A	-	0.551217	fsv_avg	6.44609	1	1	167	185	+	176	-126	10.0685	7.84e-05	0.562	CATAGTTGTCTTTGTAAAT	N	A	DIFF
FBgn0051777-2L-3707012-3707312-.fasta	FBgn0051777	2L	A	-	0.551217	fsv_avg	6.44609	1	1	222	240	+	231	-181	10.5289	6.23e-05	0.537	TGTTGAAGTCCATGCATTT	N	A	DIFF
FBgn0051789-2L-18605691-18605991+.fasta	FBgn0051789	2L	A	+	0.949202	lmg_avg	0	0	0	250	268	+	259	9	14.097	8.13e-06	0.265	TAATGAAGGCCTTGCAATT	N	A	SAME
FBgn0051797-2L-19262174-19262474-.fasta	FBgn0051797	2L	A	-	0.990733	tes_avg	7.17144	70	6.14975	234	252	+	243	-193	11.6799	3.4e-05	0.446	CAGAGAATGCCATGCGTTT	N	A	DIFF
FBgn0051806-2L-16984727-16985027+.fasta	FBgn0051806	2L	A	+	0.97331	tes_avg	10.0437	827	9.69349	8	26	+	17	-234	10.8742	5.22e-05	0.511	CAAGGATGGCTTTGAGTTC	N	A	SAME
FBgn0051851-2L-13257226-13257526+.fasta	FBgn0051851	2L	A	+	0.990287	tes_avg	7.05607	46	5.55459	225	243	+	234	-17	15.9386	2.28e-06	0.171	AAAAGTATGCCGGGATTTT	Y	A	SAME
FBgn0051851-2L-13257226-13257526+.fasta	FBgn0051851	2L	A	+	0.990287	tes_avg	7.05607	46	5.55459	247	265	+	256	6	10.4138	6.6e-05	0.543	TCAAGTTTTCTTTTCTTTA	N	A	SAME
FBgn0051861-2L-12161544-12161844+.fasta	FBgn0051861	2L	A	+	0.843569	tes_avg	9.54927	50	5.67243	209	227	+	218	-33	16.8594	1.12e-06	0.118	TCTAGTTAGCATTGACATT	Y	A	SAME
FBgn0051867-2L-11145366-11145666-.fasta	FBgn0051867	2L	A	-	0.980059	tes_avg	8.83963	37	5.24793	267	285	+	276	-226	11.5648	3.62e-05	0.448	CGAAACAGGCTGTGAAAAT	N	A	DIFF
FBgn0051876-2L-9933100-9933400-.fasta	FBgn0051876	2L	A	-	0.97573	lfb_avg	0	0	0	98	116	-	107	-57	11.3346	4.1e-05	0.469	TCCAGAGAGCAATGCTTTG	Y	A	SAME
FBgn0051907-2L-7060800-7061100-.fasta	FBgn0051907	2L	A	-	0.960631	tes_avg	10.2599	115	6.85798	88	106	-	97	-47	12.2554	2.47e-05	0.409	CGTAGTAGGCTGTGACCCT	Y	A	SAME
FBgn0051913-2L-5783780-5784080+.fasta	FBgn0051913	2L	A	+	0.97991	tes_avg	9.9193	398	8.64024	71	89	+	80	-171	12.946	1.66e-05	0.35	TTAAGTTGGCCAGGCCAAG	N	A	SAME
FBgn0051926-2L-1495209-1495509+.fasta	FBgn0051926	2L	A	+	0.966375	ova_avg	0	0	0	173	191	-	182	-69	9.83829	8.77e-05	0.574	CCTAGAAAGCATGTCGTTT	Y	A	DIFF
FBgn0051933-2L-1823280-1823580-.fasta	FBgn0051933	2L	A	-	0.973996	tes_avg	7.62797	60	5.93074	81	99	-	90	-40	14.4423	6.49e-06	0.246	CGTAGTGAGCATTGACATT	Y	A	SAME
FBgn0051954-2L-3510051-3510351-.fasta	FBgn0051954	2L	A	-	0.812399	aeye_avg	0	0	0	271	289	+	280	-230	9.95339	8.3e-05	0.562	TTCAGTTAGCATTCAATTG	N	A	DIFF
FBgn0051956-2L-3472352-3472652+.fasta	FBgn0051956	2L	A	+	0.720301	acg_avg	2.07897	4	2.32193	44	62	+	53	-198	9.72319	9.27e-05	0.577	GAAAGTATGCCTTCAGATA	N	A	SAME
FBgn0052024-3L-8800450-8800750+.fasta	FBgn0052024	3L	A	+	0.97889	ahg_avg	0	0	0	274	292	-	283	33	11.5648	3.62e-05	0.448	AGCAGGTGCCGTTGCATTT	N	A	DIFF
FBgn0052026-3L-8829311-8829611+.fasta	FBgn0052026	3L	A	+	0.85258	tes_avg	10.2655	156	7.29462	14	32	-	23	-228	9.60809	9.8e-05	0.582	TCCAATTTGCATAGCTTTT	N	A	DIFF
FBgn0052056-3L-10216309-10216609-.fasta	FBgn0052056	3L	A	-	0.21708	ltu_avg	5.05787	2	1.58496	62	80	-	71	-21	12.0252	2.81e-05	0.43	CGTGGATGGCGTTGATTTT	Y	A	SAME
FBgn0052064-3L-10483710-10484010+.fasta	FBgn0052064	3L	A	+	NA	NA	NA	1066	10.0593	234	252	+	243	-8	14.3272	7e-06	0.255	CAAAGCAGCCCTTGAAATC	Y	A	SAME
FBgn0052076-3L-11157820-11158120+.fasta	FBgn0052076	3L	A	+	0.101729	acg_avg	7.19934	6	2.80735	46	64	+	55	-196	10.644	5.88e-05	0.534	GATAGCTGGCGAGGCATCT	N	A	SAME
FBgn0052087-3L-11724993-11725293+.fasta	FBgn0052087	3L	A	+	0.944802	tes_avg	8.39059	64	6.02237	78	96	-	87	-164	11.4497	3.86e-05	0.458	TATAGTATGCAGAGCTTTT	N	A	DIFF
FBgn0052095-3L-11818781-11819081-.fasta	FBgn0052095	3L	A	-	0.277447	ova_avg	5.046	8	3.16993	236	254	-	245	-195	13.5215	1.17e-05	0.305	GCAAGGAGGCAACGAAATT	N	A	SAME
FBgn0052119-3L-13241751-13242051-.fasta	FBgn0052119	3L	A	-	0.940928	tes_avg	10.4643	750	9.55267	91	109	-	100	-50	11.795	3.2e-05	0.442	CTTAGCAATCTTTGCTTTA	Y	A	SAME
FBgn0052192-3L-18033166-18033466+.fasta	FBgn0052192	3L	A	+	0.943609	tes_avg	10.9617	103	6.70044	200	218	+	209	-42	12.1403	2.64e-05	0.414	CACAGTTGTCTACGAAATT	Y	A	SAME
FBgn0052195-3L-18105808-18106108+.fasta	FBgn0052195	3L	A	+	0.600509	ltu_avg	0.800155	1	1	260	278	+	269	19	9.60809	9.8e-05	0.582	TTCAGTTTGCATGGAACTA	N	A	SAME
FBgn0052212-3L-19480619-19480919+.fasta	FBgn0052212	3L	A	+	NA	NA	NA	8	3.16993	222	240	+	231	-20	10.1836	7.41e-05	0.557	TGCAGTTAGCAGTGAGAAA	Y	A	SAME
FBgn0052230-3L-23332175-23332475+.fasta	FBgn0052230	3L	A	+	0.122314	asg_avg	10.5789	45	5.52356	223	241	+	232	-19	9.60809	9.8e-05	0.582	CGCTGTTGGCATCGAAATA	Y	A	SAME
FBgn0052255-3L-4035548-4035848+.fasta	FBgn0052255	3L	A	+	1	fsv_avg	0	0	0	200	218	+	209	-42	12.1403	2.64e-05	0.414	TTCAGTTGGCTGGGCCAAT	Y	A	SAME
FBgn0052266-3L-3790553-3790853+.fasta	FBgn0052266	3L	A	+	0.804357	ltr_avg	3.02736	2	1.58496	209	227	-	218	-33	13.8668	9.42e-06	0.274	CGCAGAAGCCCTGGCTTTT	Y	A	DIFF
FBgn0052319-3L-1472009-1472309-.fasta	FBgn0052319	3L	A	-	0.97501	tes_avg	6.52002	28	4.85798	75	93	-	84	-34	10.0685	7.84e-05	0.562	CCGAGTAGGCTATGTGATA	Y	A	SAME
FBgn0052351-3L-8612737-8613037+.fasta	FBgn0052351	3L	A	+	0.95401	tes_avg	11.466	2811	11.4574	236	254	+	245	-6	13.2913	1.35e-05	0.321	CTTAGCAGGCAGAGATTTT	Y	A	SAME
FBgn0052354-3L-8415254-8415554-.fasta	FBgn0052354	3L	A	-	0.753594	lcns_avg	2.96901	1	1	201	219	-	210	-160	13.2913	1.35e-05	0.321	TAAAGAAAGCGGTGCTTTT	N	A	SAME
FBgn0052364-3L-8203792-8204092-.fasta	FBgn0052364	3L	A	-	0.829138	tes_avg	5.97806	6	2.80735	46	64	+	55	-5	10.2987	7e-05	0.547	CTAAGATGCCAATGATTTA	Y	A	DIFF
FBgn0052396-3L-6523578-6523878+.fasta	FBgn0052396	3L	A	+	0.907459	tes_avg	9.17333	180	7.49985	256	274	+	265	15	9.60809	9.8e-05	0.582	TCAGGTTGGCCGGGAGAAG	N	A	SAME
FBgn0052436-3L-21336882-21337182+.fasta	FBgn0052436	3L	A	+	0.96396	tes_avg	10.7253	293	8.19967	190	208	+	199	-52	10.4138	6.6e-05	0.543	CATAGTTAGCCTTTAGCTT	Y	A	SAME
FBgn0052440-3L-21353028-21353328+.fasta	FBgn0052440	3L	A	+	0.947283	tes_avg	10.3844	796	9.63844	95	113	-	104	-147	10.7591	5.54e-05	0.524	AAAAGTAGGCAACTAGTTT	N	A	DIFF
FBgn0052445-3L-21632208-21632508+.fasta	FBgn0052445	3L	A	+	NA	NA	NA	292	8.19476	239	257	+	248	-3	13.2913	1.35e-05	0.321	CACAGTGGGCTTTGATCTG	Y	A	SAME
FBgn0052447-3L-21699414-21699714-.fasta	FBgn0052447	3L	A	-	0.764489	ejd_avg	1.82057	0	0	261	279	+	270	-220	13.6366	1.09e-05	0.296	TAAAGCATCCTTTGAATTT	N	A	DIFF
FBgn0052450-3L-22322627-22322927+.fasta	FBgn0052450	3L	A	+	0.954918	tes_avg	10.4721	153	7.26679	173	191	+	182	-69	19.0463	1.62e-07	0.0596	CCAAGTAGGCGATGATTTA	Y	A	SAME
FBgn0052462-3L-22846561-22846861-.fasta	FBgn0052462	3L	A	-	0.992089	tes_avg	8.31824	64	6.02237	38	56	-	47	4	9.60809	9.8e-05	0.582	TACGGTAGGCTCTGTCTTT	N	A	SAME
FBgn0052507-X-20652196-20652496-.fasta	FBgn0052507	X	X	-	NA	NA	NA	3	2	124	142	-	133	-83	13.0611	1.55e-05	0.344	ATCAGTAGGCGATGAAATC	N	X	SAME
FBgn0052557-X-17750111-17750411-.fasta	FBgn0052557	X	X	-	0.935526	amg_avg	0	0	0	268	286	+	277	-227	12.2554	2.47e-05	0.409	TCAAATATGCAGTGCCATT	N	X	DIFF
FBgn0052568-X-16634688-16634988+.fasta	FBgn0052568	X	X	+	0.849643	tes_avg	8.98412	59	5.90689	171	189	+	180	-71	15.248	3.75e-06	0.206	TCAAATAGTCCTTGAATTA	Y	X	SAME
FBgn0052588-X-15100618-15100918-.fasta	FBgn0052588	X	X	-	0.944204	tes_avg	8.98086	9	3.32193	94	112	-	103	-53	17.4349	7.01e-07	0.0939	AGTAGTTGGCCATGATTTA	Y	X	SAME
FBgn0052591-X-14822926-14823226-.fasta	FBgn0052591	X	X	-	0.971177	tes_avg	9.49392	97	6.61471	111	129	-	120	-70	20.8879	2.13e-08	0.0157	CCAAGTAGGCCTTGAACTT	Y	X	SAME
FBgn0052603-X-14078343-14078643+.fasta	FBgn0052603	X	X	+	0.952346	ltr_avg	0	1	1	197	215	+	206	-45	15.5933	2.94e-06	0.189	TCAAGTTGGCCAGACATTT	Y	X	SAME
FBgn0052625-X-13650808-13651108-.fasta	FBgn0052625	X	X	-	0.858548	ova_avg	5.34954	4	2.32193	37	55	+	46	5	12.4856	2.17e-05	0.38	CAAAGTGAGCATAGAATTT	N	X	DIFF
FBgn0052649-X-12795096-12795396-.fasta	FBgn0052649	X	X	-	0.269561	ahg_avg	3.82251	6	2.80735	134	152	-	143	-93	10.644	5.88e-05	0.534	GCAAGCTGGCTTTTAAAAG	N	X	SAME
FBgn0052652-X-12306163-12306463-.fasta	FBgn0052652	X	X	-	0.90366	tes_avg	11.8361	573	9.16491	167	185	+	176	-126	11.795	3.2e-05	0.442	GGCAGTTGGCCCTGCCAAA	N	X	DIFF
FBgn0052655-X-12129859-12130159-.fasta	FBgn0052655	X	X	-	0.938617	tes_avg	10.5102	162	7.34873	118	136	-	127	-77	17.55	6.36e-07	0.0939	ACATGTTGGCCTTGATTTT	Y	X	SAME
FBgn0052668-X-11053742-11054042-.fasta	FBgn0052668	X	X	-	NA	NA	NA	0	0	151	169	+	160	-110	11.4497	3.86e-05	0.458	GGAGGTTTGCCTGGAAATT	N	X	DIFF
FBgn0052685-X-9976464-9976764-.fasta	FBgn0052685	X	X	-	0.185248	lcns_avg	6.5734	14	3.90689	206	224	-	215	-165	10.4138	6.6e-05	0.543	GCAAGCTATCTTTGCTAAT	N	X	SAME
FBgn0052700-X-9445211-9445511-.fasta	FBgn0052700	X	X	-	NA	NA	NA	39	5.32193	217	235	-	226	-176	10.4138	6.6e-05	0.543	ACAAGAAAGCCTTCCAATT	N	X	SAME
FBgn0052703-X-9161680-9161980-.fasta	FBgn0052703	X	X	-	0.990086	tes_avg	9.13963	82	6.37504	61	79	-	70	-20	13.5215	1.17e-05	0.305	TCAAGTAGTCGAGGCGATT	Y	X	SAME
FBgn0052713-X-8351614-8351914-.fasta	FBgn0052713	X	X	-	NA	NA	NA	71	6.16993	154	172	-	163	-113	17.7802	5.22e-07	0.0894	CCAAGGATGCCATGAAATT	N	X	SAME
FBgn0052719-X-7441974-7442274-.fasta	FBgn0052719	X	X	-	0.973983	tes_avg	8.54708	11	3.58496	282	300	+	291	-241	12.6007	2.03e-05	0.374	TAAAGTTTTCAGTGATATT	N	X	DIFF
FBgn0052762-X-5395168-5395468-.fasta	FBgn0052762	X	X	-	1	lfb_avg	0	0	0	13	31	+	22	29	12.3705	2.32e-05	0.396	AGTTGTTGGCTGTGCATTT	N	X	DIFF
FBgn0052773-X-4505367-4505667-.fasta	FBgn0052773	X	X	-	0.976273	ova_avg	0	0	0	247	265	-	256	-206	9.95339	8.3e-05	0.562	TAAAGTTTTCCATTATTTA	N	X	SAME
FBgn0052783-X-3838825-3839125+.fasta	FBgn0052783	X	X	+	NA	NA	NA	7	3	227	245	-	236	-15	9.60809	9.8e-05	0.582	CACTGCTTGCTATGATTTA	Y	X	DIFF
FBgn0052786-X-3834629-3834929+.fasta	FBgn0052786	X	X	+	NA	NA	NA	5	2.58496	227	245	-	236	-15	10.1836	7.41e-05	0.557	CACTGCATGCTATGATTTA	Y	X	DIFF
FBgn0052797-X-2319837-2320137-.fasta	FBgn0052797	X	X	-	1	tes_avg	3.25612	5	2.58496	73	91	+	82	-32	11.6799	3.4e-05	0.446	TAAAAGTTGCCTTGATTTG	Y	X	DIFF
FBgn0052801-X-1797159-1797459-.fasta	FBgn0052801	X	X	-	0.633772	lcns_avg	0	0	0	230	248	-	239	-189	9.60809	9.8e-05	0.582	AGTAGTTAGCCTTAAAATA	N	X	SAME
FBgn0052845-3L-273340-273640-.fasta	FBgn0052845	3L	A	-	0.957238	tes_avg	7.20207	18	4.24793	121	139	-	130	-80	13.9819	8.76e-06	0.272	ACAAGAATGCATTGCTTTA	Y	A	SAME
FBgn0052945-3R-404315-404615-.fasta	FBgn0052945	3R	A	-	0.929493	tes_avg	9.73929	25	4.70044	83	101	-	92	-42	12.6007	2.03e-05	0.374	TTTAGCTATCTTTGCTTTT	Y	A	SAME
FBgn0053199-2R-4838540-4838840-.fasta	FBgn0053199	2R	A	-	NA	NA	NA	27	4.80735	157	175	-	166	-116	12.1403	2.64e-05	0.414	CAAAGTTTTCGTTGATTTC	N	A	SAME
FBgn0053202-3R-2419001-2419301-.fasta	FBgn0053202	3R	A	-	0.907337	abr_avg	0	0	0	102	120	-	111	-61	11.6799	3.4e-05	0.446	GCGAGTTGGCCGAGCTTTT	Y	A	SAME
FBgn0053202-3R-2419001-2419301-.fasta	FBgn0053202	3R	A	-	0.907337	abr_avg	0	0	0	124	142	-	133	-83	13.7517	1.01e-05	0.288	GCTAGCTGGCTCGGCTTTT	N	A	SAME
FBgn0053252-X-16791169-16791469-.fasta	FBgn0053252	X	X	-	0.934452	tes_avg	8.92042	12	3.70044	104	122	-	113	-63	17.55	6.36e-07	0.0939	GGTAGTTGGCCATGATTTA	Y	X	SAME
FBgn0053286-3L-20967749-20968049-.fasta	FBgn0053286	3L	A	-	NA	NA	NA	26	4.75489	96	114	-	105	-55	13.6366	1.09e-05	0.296	ACAAGTAGGCAAGGAGTAG	Y	A	SAME
FBgn0053339-3R-20187318-20187618+.fasta	FBgn0053339	3R	A	+	NA	NA	NA	1	1	128	146	-	137	-114	9.83829	8.77e-05	0.574	TCAGGTGTGCCTTGATTCG	N	A	DIFF
FBgn0053340-3R-20188609-20188909+.fasta	FBgn0053340	3R	A	+	0.897133	tes_avg	11.9426	1363	10.4136	124	142	+	133	-118	9.95339	8.3e-05	0.562	CCAAGTTGTCCCTACAATG	N	A	SAME
FBgn0053463-2R-11783881-11784181-.fasta	FBgn0053463	2R	A	-	NA	NA	NA	0	0	139	157	-	148	-98	11.1044	4.63e-05	0.49	TGTGGCTAGCCATGCAATT	N	A	SAME
FBgn0053468-2R-10494434-10494734-.fasta	FBgn0053468	2R	A	-	0.957284	amg_avg	0	1	1	256	274	-	265	-215	11.6799	3.4e-05	0.446	TATAGTTATCATTGCATAT	N	A	SAME
FBgn0053531-2L-6252872-6253172+.fasta	FBgn0053531	2L	A	+	0.862951	abr_avg	0	0	0	214	232	+	223	-28	10.4138	6.6e-05	0.543	GCCAGTAGTCGTTGCGAAA	Y	A	SAME
FBgn0053557-X-9902992-9903292+.fasta	FBgn0053557	X	X	+	0.965248	tes_avg	3.95195	4	2.32193	51	69	-	60	-191	10.5289	6.23e-05	0.537	TGAAGAATGCCGGGCACTT	N	X	DIFF
FBgn0053703-3L-9505709-9506009-.fasta	FBgn0053703	3L	A	-	NA	NA	NA	0	0	96	114	+	105	-55	9.95339	8.3e-05	0.562	GCTGGTTTGCTTTGATTAT	Y	A	DIFF
FBgn0053704-2R-16837356-16837656+.fasta	FBgn0053704	2R	A	+	NA	NA	NA	398	8.64024	248	266	+	257	7	17.6651	5.77e-07	0.0939	CCTAGCAGGCACTGCCTTT	N	A	SAME
FBgn0053710-3L-19945839-19946139-.fasta	FBgn0053710	3L	A	-	NA	NA	NA	3	2	92	110	-	101	-51	13.2913	1.35e-05	0.321	TCAAGTAGGCTTCGAACTA	Y	A	SAME
FBgn0053752-2R-8432943-8433243+.fasta	FBgn0053752	2R	A	+	NA	NA	NA	0	0	165	183	+	174	-77	9.72319	9.27e-05	0.577	ACATGAAGTCATTGAAATT	Y	A	SAME
FBgn0053767-3L-22639156-22639456+.fasta	FBgn0053767	3L	A	+	NA	NA	NA	0	0	174	192	+	183	-68	13.1762	1.44e-05	0.333	TAAAGTAAGCAATGACTAA	Y	A	SAME
FBgn0053768-3L-22640036-22640336+.fasta	FBgn0053768	3L	A	+	NA	NA	NA	0	0	95	113	+	104	-147	11.9101	3e-05	0.431	AAAAATAGGCATTGAAAAT	N	A	SAME
FBgn0054002-3L-17851323-17851623+.fasta	FBgn0054002	3L	A	+	NA	NA	NA	10	3.45943	255	273	+	264	14	10.9893	4.92e-05	0.503	TGGAGTGGTCCTTGCGTTG	N	A	SAME
FBgn0054006-3R-23043645-23043945-.fasta	FBgn0054006	3R	A	-	NA	NA	NA	0	0	82	100	-	91	-41	10.7591	5.54e-05	0.524	CCCAGTGGTCAGCGCAATT	Y	A	SAME
FBgn0054029-2R-17858734-17859034-.fasta	FBgn0054029	2R	A	-	0.973945	tes_avg	7.27088	38	5.2854	52	70	-	61	-11	11.5648	3.62e-05	0.448	TCGAGGAAGCTTTGATTTA	Y	A	SAME
FBgn0054039-3L-14552849-14553149+.fasta	FBgn0054039	3L	A	+	0.15954	ova_avg	7.79999	83	6.39232	210	228	-	219	-32	10.4138	6.6e-05	0.543	CCCAGCTATCGGTGACTAT	Y	A	DIFF
FBgn0061196-X-4854982-4855282-.fasta	FBgn0061196	X	X	-	0.802916	tes_avg	9.13633	48	5.61471	211	229	-	220	-170	16.9745	1.02e-06	0.118	TTAAGTGGGCTATGCTTTT	N	X	SAME
FBgn0061197-2R-8193723-8194023-.fasta	FBgn0061197	2R	A	-	0.880105	tes_avg	11.7865	1173	10.1972	61	79	-	70	-20	12.4856	2.17e-05	0.38	ACAAGTGTGCTCTGAGTTT	Y	A	SAME
FBgn0061435-2R-18671558-18671858+.fasta	FBgn0061435	2R	A	+	0.94372	tes_avg	10.4698	131	7.04439	228	246	+	237	-14	13.6366	1.09e-05	0.296	TTAAGGTGGCCTTGCTCTA	Y	A	SAME
FBgn0063496-2R-14290502-14290802+.fasta	FBgn0063496	2R	A	+	1	aeye_avg	0	0	0	181	199	-	190	-61	13.1762	1.44e-05	0.333	CCAAGCTGTCAATGGATTT	Y	A	DIFF
FBgn0063499-2R-14284980-14285280-.fasta	FBgn0063499	2R	A	-	0.866989	ltu_avg	0	5	2.58496	2	20	-	11	40	9.95339	8.3e-05	0.562	GCTAGAAGGCAATTAGTTA	N	A	SAME
FBgn0064237-2R-14280920-14281220+.fasta	FBgn0064237	2R	A	+	0.66664	afb_avg	1.85982	1	1	118	136	+	127	-124	15.3631	3.46e-06	0.199	AAAAGTATGCAATGAAATT	N	A	SAME
FBgn0066084-2R-20791401-20791701-.fasta	FBgn0066084	2R	A	-	0.0906191	asg_avg	11.4691	4029	11.9766	146	164	-	155	-105	10.644	5.88e-05	0.534	CCTAGCTGGCAGCGCCACT	N	A	SAME
FBgn0067317-3R-17693474-17693774+.fasta	FBgn0067317	3R	A	+	0.990651	tes_avg	6.732	16	4.08746	225	243	+	234	-17	14.6725	5.57e-06	0.229	TGAAGCAAGCTTTGTCTTT	Y	A	SAME
FBgn0067779-2L-66333-66633+.fasta	FBgn0067779	2L	A	+	0.184421	lfb_avg	5.58854	3	2	141	159	-	150	-101	10.9893	4.92e-05	0.503	ACTAGTTGTCATTCATTTT	N	A	DIFF
FBgn0067782-3R-16380080-16380380-.fasta	FBgn0067782	3R	A	-	NA	NA	NA	NA	NA	100	118	-	109	-59	10.8742	5.22e-05	0.511	TATAGTAGGCACTTCGATT	Y	A	SAME
FBgn0069056-2R-17426747-17427047-.fasta	FBgn0069056	2R	A	-	NA	NA	NA	0	0	9	27	+	18	33	11.3346	4.1e-05	0.469	ACCAGCAGCCATTTCATTT	N	A	DIFF
FBgn0083949-3R-1765612-1765912-.fasta	FBgn0083949	3R	A	-	NA	NA	NA	0	0	96	114	-	105	-55	9.95339	8.3e-05	0.562	CCCAGCAATCGTCGAATTA	Y	A	SAME
FBgn0083963-3R-3465105-3465405-.fasta	FBgn0083963	3R	A	-	0.845872	abr_avg	4.42589	1	1	155	173	-	164	-114	11.795	3.2e-05	0.442	TGCAGCTGCCACTGCTTTT	N	A	SAME
FBgn0083968-2L-7885252-7885552+.fasta	FBgn0083968	2L	A	+	NA	NA	NA	14	3.90689	213	231	-	222	-29	9.60809	9.8e-05	0.582	TTCGGTAGGCCGCGATTAT	Y	A	DIFF
FBgn0083970-2L-8190730-8191030-.fasta	FBgn0083970	2L	A	-	0.584317	aeye_avg	0	1	1	24	42	-	33	18	11.1044	4.63e-05	0.49	ACCAGCAGTCGTCGCAATT	N	A	SAME
FBgn0083991-3R-26385870-26386170-.fasta	FBgn0083991	3R	A	-	NA	NA	NA	0	0	252	270	+	261	-211	10.2987	7e-05	0.547	ACAAGTGGGCGATGGCATT	N	A	DIFF
FBgn0085197-2L-16135186-16135486-.fasta	FBgn0085197	2L	A	-	0.944879	tes_avg	11.5113	1351	10.4009	116	134	-	125	-75	14.7876	5.16e-06	0.226	CATAGAAGGCCATGAAATC	Y	A	SAME
FBgn0085197-2L-16135186-16135486-.fasta	FBgn0085197	2L	A	-	0.944879	tes_avg	11.5113	1351	10.4009	139	157	-	148	-98	13.0611	1.55e-05	0.344	AAAAGCAGGCCATGAAACC	N	A	SAME
FBgn0085198-2L-17173230-17173530+.fasta	FBgn0085198	2L	A	+	0.970797	tes_avg	7.41404	5	2.58496	219	237	+	228	-23	12.4856	2.17e-05	0.38	CAAAACAGGCCTTTATTTG	Y	A	SAME
FBgn0085229-2R-1644916-1645216+.fasta	FBgn0085229	2R	A	+	0.0635155	acg_avg	9.88471	86	6.44294	55	73	+	64	-187	10.4138	6.6e-05	0.543	ACTAAAATGCCATGCCTTT	N	A	SAME
FBgn0085229-2R-1644916-1645216+.fasta	FBgn0085229	2R	A	+	0.0635155	acg_avg	9.88471	86	6.44294	59	77	-	68	-183	11.1044	4.63e-05	0.49	ACTAAAAGGCATGGCATTT	N	A	DIFF
FBgn0085252-2R-7123114-7123414+.fasta	FBgn0085252	2R	A	+	NA	NA	NA	0	0	44	62	+	53	-198	12.4856	2.17e-05	0.38	ATCAGTTTGCATGGATTTG	N	A	SAME
FBgn0085257-2R-7539111-7539411+.fasta	FBgn0085257	2R	A	+	0.126559	ahg_avg	6.94002	16	4.08746	178	196	-	187	-64	10.5289	6.23e-05	0.537	AACAGTTTCCATTGCAATT	Y	A	DIFF
FBgn0085273-3L-14228990-14229290-.fasta	FBgn0085273	3L	A	-	NA	NA	NA	1	1	151	169	+	160	-110	15.248	3.75e-06	0.206	GAAAGTATGCTATGAATTG	N	A	DIFF
FBgn0085285-3L-18982864-18983164-.fasta	FBgn0085285	3L	A	-	0.960716	acg_avg	0	4	2.32193	241	259	+	250	-200	13.8668	9.42e-06	0.274	CTGAGTTGGCGTTGAAATT	N	A	DIFF
FBgn0085287-3L-19945017-19945317-.fasta	FBgn0085287	3L	A	-	NA	NA	NA	29	4.90689	119	137	+	128	-78	10.7591	5.54e-05	0.524	CCTAACATGCTTGGCAATT	Y	A	DIFF
FBgn0085295-3L-4677581-4677881+.fasta	FBgn0085295	3L	A	+	NA	NA	NA	0	0	14	32	-	23	-228	9.95339	8.3e-05	0.562	CCAAGTTTTCTTTTCCTTC	N	A	DIFF
FBgn0085309-3R-13229389-13229689-.fasta	FBgn0085309	3R	A	-	NA	NA	NA	0	0	98	116	+	107	-57	10.2987	7e-05	0.547	AGAAGTAGGCCAGCCAATG	Y	A	DIFF
FBgn0085310-3R-13438372-13438672+.fasta	FBgn0085310	3R	A	+	0.89851	tes_avg	3.59835	2	1.58496	223	241	+	232	-19	11.6799	3.4e-05	0.446	ATCAGTTGCCATTGAGTTG	Y	A	SAME
FBgn0085325-3R-25548009-25548309+.fasta	FBgn0085325	3R	A	+	0.920051	ltu_avg	1.46083	1	1	274	292	+	283	33	11.3346	4.1e-05	0.469	TGAAGCTGGCCCTGCTCCT	N	A	SAME
FBgn0085331-3R-5649494-5649794-.fasta	FBgn0085331	3R	A	-	0.972856	tes_avg	5.76452	6	2.80735	254	272	-	263	-213	15.0178	4.41e-06	0.219	TTAAGAAGTCCTTGCTTTG	N	A	SAME
FBgn0085337-3R-8914770-8915070+.fasta	FBgn0085337	3R	A	+	NA	NA	NA	71	6.16993	130	148	+	139	-112	10.5289	6.23e-05	0.537	CAAAGCAGCCTTTGCCAAG	N	A	SAME
FBgn0085337-3R-8914770-8915070+.fasta	FBgn0085337	3R	A	+	NA	NA	NA	71	6.16993	180	198	+	189	-62	13.2913	1.35e-05	0.321	TCAAGCAGGCTTTGGAAAT	Y	A	SAME
FBgn0085351-X-11627877-11628177-.fasta	FBgn0085351	X	X	-	1	acr_avg	0	0	0	51	69	-	60	-10	10.2987	7e-05	0.547	CTCAGTTGGCGTTTAATCA	Y	X	SAME
FBgn0085419-2R-14426839-14427139+.fasta	FBgn0085419	2R	A	+	1	abr_avg	0	0	0	21	39	+	30	-221	10.1836	7.41e-05	0.557	GCAAGTAGGCCATACAAAC	N	A	SAME
FBgn0085464-X-5508449-5508749-.fasta	FBgn0085464	X	X	-	1	tes_avg	6.30534	30	4.9542	47	65	-	56	-6	16.0537	2.1e-06	0.164	CATAGCAATCCTTGACTTT	Y	X	SAME
FBgn0085477-2L-2417914-2418214-.fasta	FBgn0085477	2L	A	-	1	aht_avg	0	0	0	253	271	+	262	-212	10.8742	5.22e-05	0.511	TGAAACTGGCAATGAAAAT	N	A	DIFF
FBgn0085479-X-9224469-9224769-.fasta	FBgn0085479	X	X	-	NA	NA	NA	202	7.66534	120	138	-	129	-79	16.399	1.61e-06	0.145	ATCGGTAGGCCTTGAATTT	Y	X	SAME
FBgn0085506-U-9364046-9364346-.fasta	FBgn0085506	U	A	-	NA	NA	NA	0	0	27	45	-	36	15	10.644	5.88e-05	0.534	GCCAGTAAGCTAGGGTTTT	N	A	SAME
FBgn0085550-U-5053141-5053441-.fasta	FBgn0085550	U	A	-	NA	NA	NA	1	1	147	165	-	156	-106	10.4138	6.6e-05	0.543	CTTAATAGGCTTGGACATA	N	A	SAME
FBgn0085550-U-5053141-5053441-.fasta	FBgn0085550	U	A	-	NA	NA	NA	1	1	241	259	-	250	-200	10.0685	7.84e-05	0.562	TAAAGTAGCCGATGAATCG	N	A	SAME
FBgn0085582-2RHet-197982-198282-.fasta	FBgn0085582	2RHet	A	-	NA	NA	NA	0	0	136	154	+	145	-95	9.83829	8.77e-05	0.574	TTTAGTTAGCTGTACATTT	N	A	DIFF
FBgn0085644-U-2927446-2927746+.fasta	FBgn0085644	U	A	+	NA	NA	NA	1	1	150	168	+	159	-92	12.946	1.66e-05	0.35	TCAAGCAGCCCGAGAATTT	N	A	SAME
FBgn0085736-3LHet-410211-410511+.fasta	FBgn0085736	3LHet	A	+	NA	NA	NA	3	2	282	300	+	291	41	10.0685	7.84e-05	0.562	CGCAGTAGGCATTTTTATC	N	A	SAME
FBgn0086130-2L-811333-811633+.fasta	FBgn0086130	2L	A	+	0.290337	ova_avg	4.14114	3	2	203	221	+	212	-39	11.9101	3e-05	0.431	CACAAGTGGCATTGAATTC	Y	A	SAME
FBgn0086254-3L-11617430-11617730-.fasta	FBgn0086254	3L	A	-	0.150156	ahg_avg	9.75225	91	6.52356	70	88	-	79	-29	15.8235	2.48e-06	0.179	CCAAGTAGCCATTGCATTC	Y	A	SAME
FBgn0086377-3L-21438683-21438983+.fasta	FBgn0086377	3L	A	+	0.157815	ltu_avg	8.49052	59	5.90689	259	277	+	268	18	13.5215	1.17e-05	0.305	ACAAGTTGGCAGTTCCATT	N	A	SAME
FBgn0086408-2R-18695114-18695414+.fasta	FBgn0086408	2R	A	+	0.493878	abr_avg	4.40633	5	2.58496	225	243	+	234	-17	12.1403	2.64e-05	0.414	TCGAGTTTTCCGTGATTTT	Y	A	SAME
FBgn0086655-2R-2389260-2389560+.fasta	FBgn0086655	2R	A	+	0.625224	ova_avg	4.30555	1	1	134	152	+	143	-108	13.5215	1.17e-05	0.305	TCTAGTTGGCTAAGCCATT	N	A	SAME
FBgn0086676-2R-12012235-12012535+.fasta	FBgn0086676	2R	A	+	0.192722	afb_avg	7.35285	15	4	202	220	-	211	-40	10.644	5.88e-05	0.534	TCCAATTGGCGATGACAAT	Y	A	DIFF
FBgn0086898-2R-6707338-6707638-.fasta	FBgn0086898	2R	A	-	0.731035	acr_avg	0	0	0	163	181	+	172	-122	16.8594	1.12e-06	0.118	ACAAGTAGGCAACGAATTT	N	A	DIFF
FBgn0086900-3L-6141036-6141336-.fasta	FBgn0086900	3L	A	-	NA	NA	NA	0	0	29	47	-	38	13	11.2195	4.36e-05	0.483	TATAGTAATCATTGAGTCT	N	A	SAME
FBgn0086907-2L-16715640-16715940+.fasta	FBgn0086907	2L	A	+	0.944977	tes_avg	11.1991	757	9.56605	140	158	+	149	-102	11.3346	4.1e-05	0.469	GCAAGTTGGCAGCTCCTTT	N	A	SAME
FBgn0087039-3L-8297006-8297306+.fasta	FBgn0087039	3L	A	+	0.286874	ova_avg	0	2	1.58496	51	69	+	60	-191	10.644	5.88e-05	0.534	TCAAGAATTCTTTGAAAAT	N	A	SAME
FBgn0250825-3L-12120828-12121128+.fasta	FBgn0250825	3L	A	+	NA	NA	NA	180	7.49985	215	233	+	224	-27	15.4782	3.19e-06	0.189	AAAAGTATGCCATGATTAT	Y	A	SAME
FBgn0250835-2L-2591618-2591918+.fasta	FBgn0250835	2L	A	+	0.645197	ejd_avg	7.75587	49	5.64386	44	62	-	53	-198	10.644	5.88e-05	0.534	GAGGGCAGGCTTTGAATTT	N	A	DIFF
FBgn0250838-2R-19273918-19274218-.fasta	FBgn0250838	2R	A	-	0.108005	asg_avg	10.0867	158	7.31288	7	25	-	16	35	10.8742	5.22e-05	0.511	CATAGCTGTCTTTTATTTG	N	A	SAME
FBgn0250844-2L-14549024-14549324-.fasta	FBgn0250844	2L	A	-	0.960133	tes_avg	10.8212	277	8.11894	147	165	+	156	-106	15.5933	2.94e-06	0.189	CTAAGTATGCTGTGCATTG	N	A	DIFF
FBgn0250845-3R-3034086-3034386-.fasta	FBgn0250845	3R	A	-	NA	NA	NA	558	9.1267	114	132	-	123	-73	14.097	8.13e-06	0.265	GCAAGTAGGCGAGGTATTT	Y	A	SAME
FBgn0250862-X-13008913-13009213+.fasta	FBgn0250862	X	X	+	0.824763	ejd_avg	4.94598	2	1.58496	97	115	+	106	-145	13.9819	8.76e-06	0.272	CGAAGTTGTCTTTGGTTTT	N	X	SAME
FBgn0259176-2L-12546560-12546860-.fasta	FBgn0259176	2L	A	-	0.153483	asg_avg	6.59829	15	4	12	30	+	21	30	12.0252	2.81e-05	0.43	AACAACTTGCCTTGCGTTT	N	A	DIFF
FBgn0259190-X-7772818-7773118-.fasta	FBgn0259190	X	X	-	1	abr_avg	0	0	0	270	288	+	279	-229	10.644	5.88e-05	0.534	ATAAGGTAGCCATTATTTT	N	X	DIFF
FBgn0259198-X-18619579-18619879-.fasta	FBgn0259198	X	X	-	NA	NA	NA	60	5.93074	160	178	-	169	-119	10.5289	6.23e-05	0.537	GCCAGTAGGCCAGTTCATT	N	X	SAME
FBgn0259203-3L-7321981-7322281+.fasta	FBgn0259203	3L	A	+	NA	NA	NA	11	3.58496	94	112	+	103	-148	14.9027	4.77e-06	0.219	TTTAGTAAGCCATGATTAT	N	A	SAME
FBgn0259226-2R-4465945-4466245-.fasta	FBgn0259226	2R	A	-	0.84645	aeye_avg	2.07204	1	1	231	249	+	240	-190	10.2987	7e-05	0.547	CCCAGAAGCCTTGGATTCT	N	A	DIFF
FBgn0259714-2L-6411275-6411575-.fasta	FBgn0259714	2L	A	-	NA	NA	NA	1	1	115	133	+	124	-74	14.4423	6.49e-06	0.246	TGCGGTTGGCCGTGATTTA	Y	A	DIFF
FBgn0259725-2R-17557370-17557670-.fasta	FBgn0259725	2R	A	-	NA	NA	NA	47	5.58496	238	256	-	247	-197	10.5289	6.23e-05	0.537	CGCAGCAGGCGGGGTATTC	N	A	SAME
FBgn0259726-2R-17557370-17557670-.fasta	FBgn0259726	2R	A	-	NA	NA	NA	47	5.58496	238	256	-	247	-197	10.5289	6.23e-05	0.537	CGCAGCAGGCGGGGTATTC	N	A	SAME
FBgn0259727-2R-17557370-17557670-.fasta	FBgn0259727	2R	A	-	NA	NA	NA	48	5.61471	238	256	-	247	-197	10.5289	6.23e-05	0.537	CGCAGCAGGCGGGGTATTC	N	A	SAME
FBgn0259795-2R-12422197-12422497+.fasta	FBgn0259795	2R	A	+	0.887398	tes_avg	11.7237	1850	10.8541	136	154	-	145	-106	15.7084	2.7e-06	0.186	ACAAGCAGGCTATGAAAAT	N	A	DIFF
FBgn0259932-3L-9965161-9965461+.fasta	FBgn0259932	3L	A	+	NA	NA	NA	71	6.16993	223	241	+	232	-19	10.8742	5.22e-05	0.511	CTAAGATATCTTGGAATTT	Y	A	SAME
FBgn0259961-2L-11753971-11754271-.fasta	FBgn0259961	2L	A	-	NA	NA	NA	10	3.45943	50	68	-	59	-9	12.0252	2.81e-05	0.43	TTTAGTTAGCAGTGATATG	Y	A	SAME
FBgn0259989-2L-11842886-11843186+.fasta	FBgn0259989	2L	A	+	NA	NA	NA	113	6.83289	197	215	-	206	-45	12.0252	2.81e-05	0.43	AAAAGTTGTCGGGGCCTTT	Y	A	DIFF
FBgn0260450-X-16219545-16219845+.fasta	FBgn0260450	X	X	+	0.316423	ltr_avg	1.82609	2	1.58496	268	286	+	277	27	13.8668	9.42e-06	0.274	GCTAGTTGGCATTGTATAT	N	X	SAME
FBgn0260634-3R-19644313-19644613-.fasta	FBgn0260634	3R	A	-	0.291474	tes_avg	10.8974	150	7.2384	113	131	-	122	-72	14.097	8.13e-06	0.265	CGTAGCAGGCGCTGCTTTG	Y	A	SAME
FBgn0260644-3L-10623118-10623418-.fasta	FBgn0260644	3L	A	-	NA	NA	NA	29	4.90689	53	71	-	62	-12	15.8235	2.48e-06	0.179	TTTAGTTGGCTTTGTATTT	Y	A	SAME
FBgn0260648-2L-1728481-1728781+.fasta	FBgn0260648	2L	A	+	0.182224	lcns_avg	4.53096	3	2	40	58	+	49	-202	10.0685	7.84e-05	0.562	TAAAACTTTCTTTGCATTT	N	A	SAME
FBgn0260743-3R-7793179-7793479+.fasta	FBgn0260743	3R	A	+	0.249105	lfb_avg	5.4061	5	2.58496	154	172	-	163	-88	10.0685	7.84e-05	0.562	CATAGCAAGCCTTAAAAAT	N	A	DIFF
FBgn0260755-3L-833842-834142+.fasta	FBgn0260755	3L	A	+	NA	NA	NA	310	8.28077	248	266	-	257	7	9.60809	9.8e-05	0.582	GCAAAGATGCAATGACATT	N	A	DIFF
FBgn0260862-3L-692868-693168-.fasta	FBgn0260862	3L	A	-	0.164902	ova_avg	5.76998	11	3.58496	116	134	-	125	-75	16.1688	1.92e-06	0.161	TGAAGTTGGCAGTGTTTTT	Y	A	SAME
FBgn0260867-X-20130014-20130314+.fasta	FBgn0260867	X	X	+	NA	NA	NA	12	3.70044	215	233	+	224	-27	15.0178	4.41e-06	0.219	TCAAGTTGGCTATGCTTCC	Y	X	SAME
FBgn0260868-X-20317147-20317447+.fasta	FBgn0260868	X	X	+	NA	NA	NA	31	5	183	201	+	192	-59	15.0178	4.41e-06	0.219	TCAAGTTGGCTATGCTTCC	Y	X	SAME
FBgn0260869-X-20398407-20398707+.fasta	FBgn0260869	X	X	+	NA	NA	NA	18	4.24793	171	189	+	180	-71	18.1255	3.85e-07	0.0787	TCAAGTTGGCTATGCTTTC	Y	X	SAME
FBgn0260870-X-20445058-20445358+.fasta	FBgn0260870	X	X	+	NA	NA	NA	33	5.08746	179	197	+	188	-63	18.1255	3.85e-07	0.0787	TCAAGTTGGCTATGCTTTC	Y	X	SAME
FBgn0260873-X-20033575-20033875+.fasta	FBgn0260873	X	X	+	NA	NA	NA	2	1.58496	198	216	+	207	-44	16.2839	1.76e-06	0.153	TTAAGTTGGCTATGCTTTC	Y	X	SAME
FBgn0260943-3L-17141018-17141318-.fasta	FBgn0260943	3L	A	-	0.843239	abr_avg	0	1	1	8	26	-	17	34	13.9819	8.76e-06	0.272	TCCAGCAGTCGTTGCGTTC	N	A	SAME
FBgn0260955-2L-14745159-14745459-.fasta	FBgn0260955	2L	A	-	NA	NA	NA	8	3.16993	100	118	-	109	-59	10.644	5.88e-05	0.534	TAAAGTAATCATTGGGTTT	Y	A	SAME
FBgn0260964-2R-9421705-9422005-.fasta	FBgn0260964	2R	A	-	0.842552	atg_avg	0	0	0	177	195	+	186	-136	11.1044	4.63e-05	0.49	TATAGAAGTCGATGATATT	N	A	DIFF
FBgn0260967-3L-8062316-8062616-.fasta	FBgn0260967	3L	A	-	NA	NA	NA	6	2.80735	96	114	-	105	-55	16.399	1.61e-06	0.145	TGTAGTTGGCTTTGTCTTT	Y	A	SAME
FBgn0260968-3L-8063009-8063309-.fasta	FBgn0260968	3L	A	-	0.961291	tes_avg	6.91031	24	4.64386	47	65	+	56	-6	13.1762	1.44e-05	0.333	TAAAGTATTCCTTTCCTTT	Y	A	DIFF
FBgn0260968-3L-8063009-8063309-.fasta	FBgn0260968	3L	A	-	0.961291	tes_avg	6.91031	24	4.64386	75	93	-	84	-34	18.2406	3.47e-07	0.0787	CTAAGGAGGCCTTGCATAT	Y	A	SAME
FBgn0261020-2L-8302934-8303234-.fasta	FBgn0261020	2L	A	-	0.254604	lsg_avg	7.19295	12	3.70044	125	143	+	134	-84	10.2987	7e-05	0.547	GTAAGAATTCTATGATTTT	N	A	DIFF
FBgn0261085-X-13253030-13253330+.fasta	FBgn0261085	X	X	+	0.901843	abr_avg	0	0	0	151	169	+	160	-91	12.0252	2.81e-05	0.43	CGAAGCTTGCATTGTTTTC	N	X	SAME
FBgn0261085-X-13253030-13253330+.fasta	FBgn0261085	X	X	+	0.901843	abr_avg	0	0	0	251	269	+	260	10	18.0104	4.27e-07	0.0849	CCCAGTTGGCCGCGAGTTT	N	X	SAME
FBgn0261089-2L-17592009-17592309+.fasta	FBgn0261089	2L	A	+	0.814671	abr_avg	3.6517	0	0	107	125	+	116	-135	11.6799	3.4e-05	0.446	GTAAGTATGCAATTACTTT	N	A	SAME
FBgn0261258-3L-21375350-21375650+.fasta	FBgn0261258	3L	A	+	0.280386	ltr_avg	5.46005	5	2.58496	220	238	+	229	-22	13.5215	1.17e-05	0.305	AGCAGCGAGCTTTGAGTTT	Y	A	SAME
FBgn0261268-2L-15271973-15272273-.fasta	FBgn0261268	2L	A	-	0.316336	tes_avg	10.6899	162	7.34873	267	285	-	276	-226	9.95339	8.3e-05	0.562	CTAAGAAGTCAGTTACTTT	N	A	SAME
FBgn0261270-2R-10158112-10158412-.fasta	FBgn0261270	2R	A	-	0.234122	ova_avg	7.32792	25	4.70044	250	268	+	259	-209	9.72319	9.27e-05	0.577	TATAGTTGGCATTAATTCA	N	A	DIFF
FBgn0261285-3R-14973581-14973881-.fasta	FBgn0261285	3R	A	-	0.291668	abr_avg	4.63762	2	1.58496	278	296	+	287	-237	14.2121	7.55e-06	0.255	CAAAGTTGGCTGCGCTTTA	N	A	DIFF
FBgn0261293-2R-12355463-12355763+.fasta	FBgn0261293	2R	A	+	0.961076	afb_avg	0	0	0	219	237	+	228	-23	10.0685	7.84e-05	0.562	CCAAATTAGCCTTTACTAT	Y	A	SAME
FBgn0261356-3R-6607938-6608238-.fasta	FBgn0261356	3R	A	-	NA	NA	NA	1	1	147	165	-	156	-106	11.6799	3.4e-05	0.446	ACCAGGATGCACTGAATTG	N	A	SAME
FBgn0261446-X-157977-158277-.fasta	FBgn0261446	X	X	-	NA	NA	NA	1	1	158	176	-	167	-117	10.2987	7e-05	0.547	TAAAGAAGGCCTTTACAAA	N	X	SAME
FBgn0261508-3R-3318942-3319242-.fasta	FBgn0261508	3R	A	-	NA	NA	NA	5	2.58496	282	300	+	291	-241	9.83829	8.77e-05	0.574	TCCAATTAGCAAGGAATTA	N	A	DIFF
FBgn0261514-2L-13957288-13957588+.fasta	FBgn0261514	2L	A	+	NA	NA	NA	6	2.80735	133	151	-	142	-109	14.2121	7.55e-06	0.255	TACAGTAGTCATTGCAAAT	N	A	DIFF
FBgn0261522-X-9581971-9582271+.fasta	FBgn0261522	X	X	+	NA	NA	NA	109	6.78136	172	190	+	181	-70	15.4782	3.19e-06	0.189	CAAAGTAGGCATTGAACAT	Y	X	SAME
FBgn0261534-2L-14351459-14351759-.fasta	FBgn0261534	2L	A	-	NA	NA	NA	1	1	113	131	-	122	-72	12.7158	1.9e-05	0.362	CAAAGTTGTCTTTGCAAAA	Y	A	SAME
FBgn0261561-3R-1639150-1639450+.fasta	FBgn0261561	3R	A	+	NA	NA	NA	235	7.88264	61	79	+	70	-181	9.83829	8.77e-05	0.574	ATCAGTTGGCGGTGCAACG	N	A	SAME
FBgn0261566-2L-14588183-14588483-.fasta	FBgn0261566	2L	A	-	NA	NA	NA	0	0	86	104	+	95	-45	12.0252	2.81e-05	0.43	TGCAGAGTGCAATGCTTTT	Y	A	DIFF
FBgn0261573-X-19415711-19416011+.fasta	FBgn0261573	X	X	+	NA	NA	NA	19	4.32193	11	29	+	20	-231	13.6366	1.09e-05	0.296	TCTAGCAGCCATTGCGTTG	N	X	SAME
FBgn0261614-2R-18989173-18989473-.fasta	FBgn0261614	2R	A	-	NA	NA	NA	67	6.08746	146	164	-	155	-105	9.83829	8.77e-05	0.574	AAAAGTGTGCGTTTCATTT	N	A	SAME
FBgn0261631-3L-6227105-6227405-.fasta	FBgn0261631	3L	A	-	NA	NA	NA	2	1.58496	11	29	-	20	31	10.1836	7.41e-05	0.557	CGCAGTTGGCATTTTCATA	N	A	SAME
FBgn0261686-2R-6244254-6244554-.fasta	FBgn0261686	2R	A	-	NA	NA	NA	805	9.65464	57	75	-	66	-16	15.7084	2.7e-06	0.186	TCAGGCAGGCTTTGCTATT	Y	A	SAME
FBgn0261703-X-15191548-15191848+.fasta	FBgn0261703	X	X	+	NA	NA	NA	2	1.58496	136	154	-	145	-106	9.95339	8.3e-05	0.562	GACAGCTTTCGATGCGTTT	N	X	DIFF
FBgn0261705-2R-18930411-18930711-.fasta	FBgn0261705	2R	A	-	NA	NA	NA	0	0	64	82	-	73	-23	10.8742	5.22e-05	0.511	CAAAGTTGGCGGTTAAAAT	Y	A	SAME
FBgn0261714-3R-7991857-7992157-.fasta	FBgn0261714	3R	A	-	NA	NA	NA	0	0	63	81	+	72	-22	11.4497	3.86e-05	0.458	CTCAGTTTTCTTGGACATT	Y	A	DIFF
FBgn0261789-3R-2171582-2171882-.fasta	FBgn0261789	3R	A	-	NA	NA	NA	85	6.42626	73	91	-	82	-32	14.9027	4.77e-06	0.219	GATAGTTAGCTTTGAAATT	Y	A	SAME
FBgn0261790-2L-7885374-7885674-.fasta	FBgn0261790	2L	A	-	NA	NA	NA	25	4.70044	91	109	-	100	-50	9.60809	9.8e-05	0.582	TTCGGTAGGCCGCGATTAT	Y	A	SAME
FBgn0261802-2L-22130970-22131270+.fasta	FBgn0261802	2L	A	+	NA	NA	NA	2	1.58496	15	33	+	24	-227	12.7158	1.9e-05	0.362	TCAAGTGATCATTGACTTA	N	A	SAME
FBgn0261808-3R-7023063-7023363+.fasta	FBgn0261808	3R	A	+	NA	NA	NA	3	2	78	96	+	87	-164	15.5933	2.94e-06	0.189	TTCAGTTGGCTTTTACTTT	N	A	SAME
FBgn0261834-X-15870650-15870950+.fasta	FBgn0261834	X	X	+	NA	NA	NA	7	3	220	238	+	229	-22	20.0822	5.49e-08	0.0311	CCTAGTTGGCCATGATTTA	Y	X	SAME
FBgn0261986-3R-21487266-21487566+.fasta	FBgn0261986	3R	A	+	NA	NA	NA	13	3.80735	191	209	+	200	-51	13.2913	1.35e-05	0.321	CCCAATTGGCATTGCTATC	Y	A	SAME
FBgn0261989-2R-9459994-9460294-.fasta	FBgn0261989	2R	A	-	NA	NA	NA	18	4.24793	26	44	+	35	16	10.9893	4.92e-05	0.503	CCCAGAAAGCTCTGCATCT	N	A	DIFF
FBgn0262030-3L-2005600-2005900-.fasta	FBgn0262030	3L	A	-	NA	NA	NA	103	6.70044	100	118	+	109	-59	10.9893	4.92e-05	0.503	TAAAGTTGGCAGGGTTTCT	Y	A	DIFF
FBgn0262098-2R-20696620-20696920+.fasta	FBgn0262098	2R	A	+	NA	NA	NA	31	5	223	241	-	232	-19	14.5574	6.02e-06	0.237	CAAAGTTTGCTGTGACTTC	Y	A	DIFF
FBgn0262101-X-17140998-17141298-.fasta	FBgn0262101	X	X	-	NA	NA	NA	3	2	29	47	-	38	13	13.6366	1.09e-05	0.296	CGAAGTGGGCAGTGCCTAG	N	X	SAME
FBgn0262102-2R-14574626-14574926+.fasta	FBgn0262102	2R	A	+	NA	NA	NA	85	6.42626	80	98	-	89	-162	9.60809	9.8e-05	0.582	TCCAGCTGGCCGTTGATTC	N	A	DIFF
FBgn0262352-2L-13119043-13119343+.fasta	FBgn0262352	2L	A	+	NA	NA	NA	20	4.39232	161	179	+	170	-81	12.3705	2.32e-05	0.396	AGCAGCTGGCGATGCAAAT	N	A	SAME
FBgn0262358-2L-4437536-4437836+.fasta	FBgn0262358	2L	A	+	NA	NA	NA	1	1	77	95	+	86	-165	14.9027	4.77e-06	0.219	TAATGTTGGCCATGAATTA	N	A	SAME
FBgn0262360-2R-9488553-9488853-.fasta	FBgn0262360	2R	A	-	NA	NA	NA	38	5.2854	109	127	-	118	-68	10.9893	4.92e-05	0.503	CTAAGCTTGCTTTTCCTTA	Y	A	SAME
FBgn0262485-X-15115158-15115458-.fasta	FBgn0262485	X	X	-	NA	NA	NA	25	4.70044	121	139	-	130	-80	17.4349	7.01e-07	0.0939	AGTAGTTGGCCATGATTTA	Y	X	SAME
FBgn0262486-X-15117480-15117780-.fasta	FBgn0262486	X	X	-	NA	NA	NA	13	3.80735	180	198	-	189	-139	17.4349	7.01e-07	0.0939	AGTAGTTGGCCATGATTTA	N	X	SAME
FBgn0262487-X-16962505-16962805-.fasta	FBgn0262487	X	X	-	NA	NA	NA	63	6	112	130	-	121	-71	17.8953	4.72e-07	0.0891	CCAAGTAGGCGTTTCATTT	Y	X	SAME
FBgn0262528-3L-15654716-15655016+.fasta	FBgn0262528	3L	A	+	NA	NA	NA	0	0	46	64	+	55	-196	11.9101	3e-05	0.431	TGCAGATGTCTTGGAATTG	N	A	SAME
FBgn0262531-3L-17639786-17640086-.fasta	FBgn0262531	3L	A	-	NA	NA	NA	1	1	140	158	+	149	-99	13.7517	1.01e-05	0.288	TAAAGTAGGCTTTAATTAT	N	A	DIFF
FBgn0262546-2L-7840281-7840581-.fasta	FBgn0262546	2L	A	-	NA	NA	NA	3	2	25	43	-	34	17	14.6725	5.57e-06	0.229	GAAAGTAGTCCTTGCATAA	N	A	SAME
FBgn0262559-3R-14051867-14052167+.fasta	FBgn0262559	3R	A	+	NA	NA	NA	61	5.9542	77	95	+	86	-165	11.4497	3.86e-05	0.458	GAAAGTATGCTTTTCCTTA	N	A	SAME
FBgn0262563-2R-13027379-13027679-.fasta	FBgn0262563	2R	A	-	NA	NA	NA	18	4.24793	97	115	+	106	-56	14.2121	7.55e-06	0.255	TAAAGCTGGCAAAGCTTTT	Y	A	DIFF
FBgn0262566-2R-21027013-21027313-.fasta	FBgn0262566	2R	A	-	NA	NA	NA	107	6.75489	102	120	-	111	-61	10.0685	7.84e-05	0.562	ATTAGTTAGCTTTGTATTA	Y	A	SAME
FBgn0262574-2R-7198085-7198385+.fasta	FBgn0262574	2R	A	+	NA	NA	NA	6	2.80735	10	28	+	19	-232	15.4782	3.19e-06	0.189	CACAGGAGGCTTGGAGTTG	N	A	SAME
FBgn0262581-3L-14665486-14665786-.fasta	FBgn0262581	3L	A	-	NA	NA	NA	1080	10.0782	116	134	-	125	-75	12.1403	2.64e-05	0.414	TCTAGGAGGCCAGTCATTA	Y	A	SAME
FBgn0262608-X-4141095-4141395+.fasta	FBgn0262608	X	X	+	NA	NA	NA	2	1.58496	250	268	+	259	9	9.72319	9.27e-05	0.577	TCAAGTAGTCGATACATTC	N	X	SAME
FBgn0262614-3R-4671960-4672260-.fasta	FBgn0262614	3R	A	-	NA	NA	NA	2	1.58496	98	116	+	107	-57	10.644	5.88e-05	0.534	GCCAGCAGGCAACGCGATC	Y	A	DIFF
FBgn0262636-4-415897-416197-.fasta	FBgn0262636	4	A	-	NA	NA	NA	0	0	124	142	+	133	-83	14.5574	6.02e-06	0.237	CCAAGTAAGCATTGCCAAG	N	A	DIFF
FBgn0262681-3L-158160-158460-.fasta	FBgn0262681	3L	A	-	NA	NA	NA	23	4.58496	251	269	+	260	-210	11.5648	3.62e-05	0.448	CGATGCTGGCCCTGAAATG	N	A	DIFF
FBgn0262714-3L-12798751-12799051+.fasta	FBgn0262714	3L	A	+	NA	NA	NA	4	2.32193	237	255	-	246	-5	9.95339	8.3e-05	0.562	ATAAGTAATCTATGAAATA	Y	A	DIFF
FBgn0262733-3L-4626081-4626381-.fasta	FBgn0262733	3L	A	-	NA	NA	NA	2	1.58496	56	74	-	65	-15	10.644	5.88e-05	0.534	CGCAGTTTCCCACGATTTT	Y	A	SAME
FBgn0262786-2L-11657159-11657459+.fasta	FBgn0262786	2L	A	+	NA	NA	NA	35	5.16993	223	241	+	232	-19	10.0685	7.84e-05	0.562	TAAAGCATGCGGTGGGTTT	Y	A	SAME
FBgn0262787-3L-6268636-6268936+.fasta	FBgn0262787	3L	A	+	NA	NA	NA	305	8.25739	41	59	-	50	-201	10.644	5.88e-05	0.534	TAAAGATTGCGATGCATAT	N	A	DIFF
FBgn0262792-3L-17926857-17927157+.fasta	FBgn0262792	3L	A	+	NA	NA	NA	2	1.58496	219	237	+	228	-23	10.644	5.88e-05	0.534	AAAAGCAAGCTGTGCTTAA	Y	A	SAME
FBgn0262793-3L-17926881-17927181+.fasta	FBgn0262793	3L	A	+	NA	NA	NA	7	3	195	213	+	204	-47	10.644	5.88e-05	0.534	AAAAGCAAGCTGTGCTTAA	Y	A	SAME
FBgn0262813-3L-13830605-13830905+.fasta	FBgn0262813	3L	A	+	NA	NA	NA	0	0	216	234	-	225	-26	10.5289	6.23e-05	0.537	TGAAAGTGTCCATGCATTG	Y	A	DIFF
FBgn0262817-2R-6972840-6973140+.fasta	FBgn0262817	2R	A	+	NA	NA	NA	5	2.58496	104	122	+	113	-138	12.3705	2.32e-05	0.396	TGCAGCTGGCCGCGCAAAT	N	A	SAME
FBgn0262845-2R-19489928-19490228-.fasta	FBgn0262845	2R	A	-	NA	NA	NA	180	7.49985	83	101	-	92	-42	12.0252	2.81e-05	0.43	CCTAGTTGGCGTGGAGAAA	Y	A	SAME
FBgn0262869-3R-16310259-16310559-.fasta	FBgn0262869	3R	A	-	NA	NA	NA	0	0	225	243	+	234	-184	11.1044	4.63e-05	0.49	CAATGTTGGCTCTGCGATT	N	A	DIFF
FBgn0262879-2L-20477498-20477798-.fasta	FBgn0262879	2L	A	-	NA	NA	NA	0	0	20	38	+	29	22	9.72319	9.27e-05	0.577	GAAAGTTTTCTCTGAATTG	N	A	DIFF
FBgn0262882-2R-13092462-13092762+.fasta	FBgn0262882	2R	A	+	NA	NA	NA	25	4.70044	233	251	+	242	-9	12.7158	1.9e-05	0.362	TGAAGCAAGCTTTGAAAAA	Y	A	SAME
FBgn0262967-X-7387134-7387434-.fasta	FBgn0262967	X	X	-	NA	NA	NA	99	6.64386	204	222	-	213	-163	21.003	1.85e-08	0.0151	TAAAGTTGGCCTGGAATTT	N	X	SAME
FBgn0262981-X-18515280-18515580+.fasta	FBgn0262981	X	X	+	NA	NA	NA	13	3.80735	230	248	+	239	-12	12.8309	1.77e-05	0.357	ACCAGTAGGCATTTAATAG	Y	X	SAME
FBgn0262986-3L-11951140-11951440+.fasta	FBgn0262986	3L	A	+	NA	NA	NA	0	0	122	140	-	131	-120	12.8309	1.77e-05	0.357	CATAGCTGTCCTTGAAAAG	N	A	DIFF
FBgn0263023-3R-11659103-11659403-.fasta	FBgn0263023	3R	A	-	NA	NA	NA	4	2.32193	84	102	-	93	-43	16.2839	1.76e-06	0.153	AAAAGGAGGCTTTGACTTA	Y	A	SAME
FBgn0263102-2R-6445142-6445442+.fasta	FBgn0263102	2R	A	+	NA	NA	NA	4	2.32193	48	66	-	57	-194	11.795	3.2e-05	0.442	ACTAGGTGGCATCGCCTTA	N	A	DIFF
FBgn0263113-2R-13426576-13426876+.fasta	FBgn0263113	2R	A	+	NA	NA	NA	9	3.32193	209	227	+	218	-33	12.0252	2.81e-05	0.43	TATTGTTTGCCTGGCATTT	Y	A	SAME
FBgn0263117-3R-18149765-18150065-.fasta	FBgn0263117	3R	A	-	NA	NA	NA	0	0	87	105	-	96	-46	14.097	8.13e-06	0.265	CCCAGGAGGCCGTGTTTCT	Y	A	SAME
FBgn0263219-3L-8231496-8231796+.fasta	FBgn0263219	3L	A	+	NA	NA	NA	0	0	175	193	+	184	-67	9.72319	9.27e-05	0.577	AAAGGTTGGCAATGCTATC	Y	A	SAME
FBgn0263246-3L-3247764-3248064+.fasta	FBgn0263246	3L	A	+	NA	NA	NA	0	0	29	47	+	38	-213	11.5648	3.62e-05	0.448	ACAGGTTGGCAATGCCATA	N	A	SAME
FBgn0263251-3L-9965161-9965461+.fasta	FBgn0263251	3L	A	+	NA	NA	NA	66	6.06609	223	241	+	232	-19	10.8742	5.22e-05	0.511	CTAAGATATCTTGGAATTT	Y	A	SAME
FBgn0263271-2R-6243285-6243585-.fasta	FBgn0263271	2R	A	-	NA	NA	NA	696	9.44501	62	80	-	71	-21	17.7802	5.22e-07	0.0894	CAAAGCAGGCTGTGAGATT	Y	A	SAME
FBgn0263322-2L-2619936-2620236+.fasta	FBgn0263322	2L	A	+	NA	NA	NA	0	0	188	206	+	197	-54	9.95339	8.3e-05	0.562	TCAAGAATGCATTGTAAAT	Y	A	SAME
FBgn0263403-3R-6913891-6914191+.fasta	FBgn0263403	3R	A	+	NA	NA	NA	17	4.16993	46	64	+	55	-196	14.5574	6.02e-06	0.237	GGCAGTGGGCGTGGACTTT	N	A	SAME
FBgn0263747-X-15666953-15667253+.fasta	FBgn0263747	X	X	+	NA	NA	NA	3	2	82	100	+	91	-160	12.1403	2.64e-05	0.414	CCAAATTTGCCATGTCTTT	N	X	SAME
FBgn0263748-X-15672928-15673228+.fasta	FBgn0263748	X	X	+	NA	NA	NA	0	0	49	67	-	58	-193	9.72319	9.27e-05	0.577	GGAAATTGGCAGGGAATAT	N	X	DIFF
FBgn0263778-X-8219171-8219471-.fasta	FBgn0263778	X	X	-	NA	NA	NA	1	1	71	89	-	80	-30	10.644	5.88e-05	0.534	GTAAATAGGCTTCGCGTTT	Y	X	SAME
FBgn0263831-3L-5145425-5145725-.fasta	FBgn0263831	3L	A	-	NA	NA	NA	5	2.58496	119	137	-	128	-78	9.83829	8.77e-05	0.574	AAAAGTTATCATTGCCAAT	Y	A	SAME
FBgn0263841-3L-21291593-21291893+.fasta	FBgn0263841	3L	A	+	NA	NA	NA	76	6.26679	106	124	+	115	-136	10.8742	5.22e-05	0.511	CGAAGTAAGCTAGTAATTA	N	A	SAME
FBgn0263982-2L-19101793-19102093+.fasta	FBgn0263982	2L	A	+	NA	NA	NA	406	8.66888	147	165	+	156	-95	9.60809	9.8e-05	0.582	TGCAGTAAGCTTTCATATA	N	A	SAME
FBgn0264260-2L-15776801-15777101-.fasta	FBgn0264260	2L	A	-	NA	NA	NA	176	7.46761	39	57	-	48	3	16.0537	2.1e-06	0.164	ATCAGTTAGCCATGCCTTT	N	A	SAME
FBgn0264486-3L-12882619-12882919+.fasta	FBgn0264486	3L	A	+	NA	NA	NA	0	0	150	168	-	159	-92	9.72319	9.27e-05	0.577	CCAAGCAGGCGTATACTTC	N	A	DIFF
FBgn0264492-3L-23090188-23090488+.fasta	FBgn0264492	3L	A	+	NA	NA	NA	38	5.2854	46	64	-	55	-196	13.7517	1.01e-05	0.288	CCAAGTTTGCATAGATTTG	N	A	DIFF
FBgn0264494-2L-1732273-1732573+.fasta	FBgn0264494	2L	A	+	NA	NA	NA	3	2	123	141	-	132	-119	11.1044	4.63e-05	0.49	AACAGCAGGCTATAAATTA	N	A	DIFF
FBgn0264516-3L-3972648-3972948+.fasta	FBgn0264516	3L	A	+	NA	NA	NA	13	3.80735	104	122	-	113	-138	14.7876	5.16e-06	0.226	AAAAGTTGTCAGTGAGTTT	N	A	DIFF
FBgn0264544-2L-15676051-15676351-.fasta	FBgn0264544	2L	A	-	NA	NA	NA	3	2	123	141	-	132	-82	10.5289	6.23e-05	0.537	TAAAGCTAGCATCGTATTT	N	A	SAME
FBgn0264545-2L-15711048-15711348-.fasta	FBgn0264545	2L	A	-	NA	NA	NA	3	2	123	141	-	132	-82	10.5289	6.23e-05	0.537	TAAAGCTAGCATCGTATTT	N	A	SAME
FBgn0264560-2R-8213614-8213914+.fasta	FBgn0264560	2R	A	+	NA	NA	NA	25	4.70044	79	97	-	88	-163	9.60809	9.8e-05	0.582	CCAAGCTGTCGATCAAATT	N	A	DIFF
FBgn0264563-3R-22890907-22891207+.fasta	FBgn0264563	3R	A	+	NA	NA	NA	192	7.59246	81	99	-	90	-161	11.9101	3e-05	0.431	ATCAGTGGTCATTGATTTA	N	A	DIFF
FBgn0264598-X-2281646-2281946-.fasta	FBgn0264598	X	X	-	NA	NA	NA	0	0	278	296	-	287	-237	9.95339	8.3e-05	0.562	ACAAGCAGTCGTAGCTTTA	N	X	SAME
FBgn0264606-3L-2711639-2711939-.fasta	FBgn0264606	3L	A	-	NA	NA	NA	0	0	213	231	+	222	-172	11.5648	3.62e-05	0.448	ACCAGCTGGCCCAGCATTA	N	A	DIFF
FBgn0264695-2L-16766483-16766783+.fasta	FBgn0264695	2L	A	+	NA	NA	NA	9	3.32193	56	74	-	65	-186	11.6799	3.4e-05	0.446	GCAAGTGGGCATTTCTATG	N	A	DIFF
FBgn0264855-2L-414726-415026-.fasta	FBgn0264855	2L	A	-	NA	NA	NA	6	2.80735	72	90	-	81	-31	13.4064	1.25e-05	0.313	CGAAGTAATCATTGTATTT	Y	A	SAME
FBgn0265001-2L-9770945-9771245-.fasta	FBgn0265001	2L	A	-	NA	NA	NA	0	0	187	205	+	196	-146	10.0685	7.84e-05	0.562	CGAAGATGGCTGGGAACTG	N	A	DIFF
FBgn0265060-2R-2868649-2868949-.fasta	FBgn0265060	2R	A	-	NA	NA	NA	1	1	124	142	-	133	-83	10.5289	6.23e-05	0.537	CCTAGTTATCCATGCAAAA	N	A	SAME
FBgn0265089-3L-8222073-8222373+.fasta	FBgn0265089	3L	A	+	NA	NA	NA	298	8.224	224	242	+	233	-18	13.6366	1.09e-05	0.296	CCAAGGTGGCAACGCTTTA	Y	A	SAME
FBgn0265185-2R-8839747-8840047-.fasta	FBgn0265185	2R	A	-	NA	NA	NA	10	3.45943	270	288	+	279	-229	9.72319	9.27e-05	0.577	CCAAACAGGCGGTACTTTT	N	A	DIFF
FBgn0265186-2R-8839747-8840047-.fasta	FBgn0265186	2R	A	-	NA	NA	NA	1	1	270	288	+	279	-229	9.72319	9.27e-05	0.577	CCAAACAGGCGGTACTTTT	N	A	DIFF
FBgn0265257-2L-6747863-6748163-.fasta	FBgn0265257	2L	A	-	NA	NA	NA	45	5.52356	45	63	-	54	-4	10.0685	7.84e-05	0.562	TCAAGGAACCTTTGAGTTC	Y	A	SAME
FBgn0265341-2R-5931249-5931549+.fasta	FBgn0265341	2R	A	+	NA	NA	NA	3	2	129	147	-	138	-113	10.5289	6.23e-05	0.537	TGAAGTGTGCCTGTCCATT	N	A	DIFF
FBgn0265342-2R-5937602-5937902+.fasta	FBgn0265342	2R	A	+	NA	NA	NA	116	6.87036	221	239	+	230	-21	9.72319	9.27e-05	0.577	TTAAGTAGGCTTGCCTATA	Y	A	SAME
FBgn0265630-X-13105656-13105956-.fasta	FBgn0265630	X	X	-	NA	NA	NA	42	5.42626	38	56	-	47	4	10.5289	6.23e-05	0.537	TCTAGTTGGCATCTCGTTA	N	X	SAME
FBgn0265632-2R-4137049-4137349-.fasta	FBgn0265632	2R	A	-	NA	NA	NA	10	3.45943	193	211	-	202	-152	12.4856	2.17e-05	0.38	TAAAGTAGGCATTTTATTG	N	A	SAME
FBgn0265726-X-13586074-13586374+.fasta	FBgn0265726	X	X	+	NA	NA	NA	48	5.61471	191	209	+	200	-51	13.0611	1.55e-05	0.344	CGAAGTAGGCCCTGTTAAT	Y	X	SAME
FBgn0265835-2R-16122249-16122549+.fasta	FBgn0265835	2R	A	+	NA	NA	NA	0	0	99	117	+	108	-143	10.9893	4.92e-05	0.503	CCAAGGATTCAACGAATTT	N	A	SAME

## Sheet: motif_divergence
FBgn_motif_start	FBgn	chrom	XA	TS_8	HK_2	strand_SD	mot1	mot2	mot3	mot4	mot5	mot6	mot7	mot8	mot9	mot10	mot11	mot12	mot13	mot14	mot15	mot16	mot17	mot18	mot19	gn_strand	motif_strand	tau	tissue_max_exp_FlyAtlas	tes_exp_FlyAtlas	RPKM_testis	log(RPKM_testis)
FBgn0264560_79	FBgn0264560	2R	A	N	N	DIFF	S	sub_del_new	S	S	S	D	D	D	S	D	sub_del	sub_del	sub_del	sub_del_new	S	S	S	S	D	+	-	NA	NA	NA	25	4.70044
FBgn0039754_61	FBgn0039754	3R	A	N	N	DIFF	S	S	S	S	S	S	S	S	S	S	S	S	S	S	S	S	S	S	S	-	+	0.684435	ejd_avg	5.2855	7	3
FBgn0003002_105	FBgn0003002	3R	A	N	N	DIFF	S	S	S	S	S	S	S	S	S	S	S	S	S	D	S	S	S	S	S	+	-	0.790301	lcns_avg	0	0	0
FBgn0033294_254	FBgn0033294	2R	A	N	N	DIFF	S	S	S	S	S	S	S	S	S	S	S	S	S	S	S	S	S	S	S	+	-	NA	NA	NA	5	2.58496
FBgn0264695_56	FBgn0264695	2L	A	N	N	DIFF	S	S	S	S	S	S	S	S	S	S	S	S	S	S	S	S	S	S	S	+	-	NA	NA	NA	9	3.32193
FBgn0003502_118	FBgn0003502	2L	A	N	N	DIFF	S	S	S	S	S	S	S	S	S	S	S	S	S	S	S	S	S	S	S	-	+	0.35153	lcns_avg	4.04844	1	1
FBgn0263102_48	FBgn0263102	2R	A	N	N	DIFF	S	S	S	S	S	S	S	S	S	S	S	S	S	S	S	S	S	S	S	+	-	NA	NA	NA	4	2.32193
FBgn0036639_80	FBgn0036639	3L	A	N	N	DIFF	S	S	S	S	S	S	S	S	S	S	S	S	S	S	S	S	S	S	S	+	-	NA	NA	NA	0	0
FBgn0043005_226	FBgn0043005	3R	A	N	N	DIFF	S	S	S	S	S	S	S	S	S	S	D	S	S	S	S	S	S	S	S	-	+	0.843113	abr_avg	3.72571	2	1.58496
FBgn0053339_128	FBgn0053339	3R	A	N	N	DIFF	S	S	S	S	S	S	S	S	S	S	S	S	S	S	S	S	S	S	S	+	-	NA	NA	NA	1	1
FBgn0038912_115	FBgn0038912	3R	A	N	N	DIFF	S	S	S	S	S	S	S	S	D	S	S	S	S	S	S	S	S	S	S	+	-	0.463946	aeye_avg	4.55287	5	2.58496
FBgn0050280_165	FBgn0050280	2R	A	N	N	DIFF	S	S	D	S	S	S	S	S	S	S	S	S	S	S	S	sub_del	sub_del	sub_del	sub_del_new	+	-	0.908783	afb_avg	0	0	0
FBgn0259989_197	FBgn0259989	2L	A	N	N	DIFF	S	S	S	S	S	S	S	S	S	S	S	D	D	S	S	S	mel_del_new	S	S	+	-	NA	NA	NA	113	6.83289
FBgn0261703_136	FBgn0261703	X	X	N	N	DIFF	S	S	S	S	S	S	S	S	S	D	D	S	S	S	S	S	S	S	S	+	-	NA	NA	NA	2	1.58496
FBgn0026438_238	FBgn0026438	2L	A	N	N	DIFF	S	S	S	S	S	S	S	S	S	S	S	S	S	S	S	S	S	S	S	-	+	0.845607	aeye_avg	0	0	0
FBgn0261514_133	FBgn0261514	2L	A	N	N	DIFF	S	S	S	S	S	S	S	S	S	S	S	S	S	S	S	S	S	S	S	+	-	NA	NA	NA	6	2.80735
FBgn0015576_77	FBgn0015576	3R	A	N	N	DIFF	S	S	S	S	S	S	S	S	S	S	S	S	S	S	S	S	D	D	S	-	+	0.3277	aeye_avg	5.88008	4	2.32193
FBgn0026385_273	FBgn0026385	2R	A	N	N	DIFF	S	S	D	S	S	S	S	S	S	S	D	D	S	S	S	S	S	S	S	-	+	1	aeye_avg	0	0	0
FBgn0010905_38	FBgn0010905	3L	A	N	N	DIFF	S	S	D	S	S	N	N	N	N	N	N	N	N	N	N	N	N	N	N	-	+	0.334762	abr_avg	4.46624	5	2.58496
FBgn0265186_15	FBgn0265186	2R	A	N	N	DIFF	S	S	S	S	S	S	S	S	S	S	S	S	S	S	S	S	S	S	S	-	+	NA	NA	NA	1	1
FBgn0004875_84	FBgn0004875	3L	A	N	N	DIFF	N	N	N	N	N	N	N	N	N	N	N	N	N	N	N	N	N	N	N	+	-	0.260156	abr_avg	4.41726	21	4.45943
FBgn0085287_166	FBgn0085287	3L	A	N	N	DIFF	D	S	S	S	S	D	D	S	S	S	S	S	D	D	S	S	S	S	S	-	+	NA	NA	NA	29	4.90689
[truncated: 825 more rows]
